# Supplementary material for: The Identification of MATE Antisense Transcripts in Soybean Using Strand-Specific RNA-Seq Datasets
Source: MDPI journal article supplement (doi:10.3390/genes13020228), 2022-01-26
Supplement: s1 [file s1]

**Table S1.** List of strand-specific RNA-seq datasets of *Glycine soja* [1] used for transcriptome assembly and *MATE* antisense transcript identification.

| BioProject/SRA Accession | Soybean germplasm                                                       | Tissue type                                                                                                                  | Condition                                                                                                                  |
|--------------------------|-------------------------------------------------------------------------|------------------------------------------------------------------------------------------------------------------------------|----------------------------------------------------------------------------------------------------------------------------|
| SRP158454 [2]            | W05                                                                     | Embryo, cotyledon and hypocotyl, root, apical bud, stem, flower, 7-day pod, 14-day pod, 14-day seed, 40-day pod, 40-day seed | Normal                                                                                                                     |
|                          |                                                                         | Nodule, root                                                                                                                 | Roots were treated with <i>Sinorhizobium fredii</i> CCBAU 25509 or <i>Sinorhizobium fredii</i> CCBAU 45436 to form nodules |
| PRJNA281671 [3]          | C1, C3, C4, C5, C6, C7, C8, C9, Y1, Y2, Y3, Y4, Y5, Y6, Y7, Y8, Y9, Y10 | Seed                                                                                                                         | Normal                                                                                                                     |
| PRJNA369483 [4]          | ys1, ys16, ys17, ys23, ys26, ys29, ys34                                 | Seed                                                                                                                         | Normal                                                                                                                     |
| PRJNA336336 [5]          | PI407179, PI424007, PI424123, PI507656                                  | Leaf                                                                                                                         | Ozone                                                                                                                      |

## References

1. Lin, X.; Lin, W.; Ku, Y.-S.; Wong, F.; Li, M.-W.; Lam, H.-M.; Ngai, S.-M.; Chan, T.-F. Analysis of soybean long non-coding RNAs reveals a subset of small peptide-coding transcripts. *Plant Physiol.* **2020**, *182*, 1359–1374.
2. Xie, M.; Chung, C.Y.-L.; Li, M.-W.; Wong, F.-L.; Wang, X.; Liu, A.; Wang, Z.; Leung, A.K.-Y.; Wong, T.-H.; Tong, S.-W.; et al. A reference-grade wild soybean genome. *Nat. Commun.* **2019**, *10*.
3. Lu, X.; Li, Q.-T.; Xiong, Q.; Li, W.; Bi, Y.-D.; Lai, Y.-C.; Liu, X.-L.; Man, W.-Q.; Zhang, W.-K.; Ma, B.; et al. The transcriptomic signature of developing soybean seeds reveals the genetic basis of seed trait adaptation during domestication. *Plant J.* **2016**, *86*, 530–544.
4. Yu, C.; Qu, Z.; Zhang, Y.; Zhang, X.; Lan, T.; Adelson, D.L.; Wang, D.; Zhu, Y. Seed weight differences between wild and domesticated soybeans are associated with specific changes in gene expression. *Plant Cell Rep.* **2017**, *36*, 1417–1426.
5. Waldeck, N.; Burkey, K.; Carter, T.; Dickey, D.; Song, Q.; Taliencio, E. RNA-Seq study reveals genetic responses of diverse wild soybean accessions to increased ozone levels. *BMC Genomics* **2017**, *18*, 498.
