# Supplementary material for: The Identification of MATE Antisense Transcripts in Soybean Using Strand-Specific RNA-Seq Datasets
Source: MDPI journal article supplement (doi:10.3390/genes13020228), 2022-01-26
Supplement: s1 [file s1]

**Table S2.** List of primers used in this study.

| Primer <sup>#</sup>                                                   | Primer sequence (5'-3') |
|-----------------------------------------------------------------------|-------------------------|
| MSTRG.9425 RTq-PCR forward ( <i>Glyma.03G0018400</i> RT-qPCR reverse) | CCGTGACAAGAGTTGGTTGTT   |
| MSTRG.9425 RTq-PCR reverse ( <i>Glyma.03G0018400</i> RT-qPCR forward) | CAGCTTCATGGTACTGTGCCT   |
| MSTRG.47510 RTq-PCR forward ( <i>Glyma.11G026300</i> RT-qPCR reverse) | GCTTAACAGGTCCAACTTTGAGT |
| MSTRG.47510 RTq-PCR reverse ( <i>Glyma.11G026300</i> RT-qPCR forward) | AGATCCAACGCAGAGACCAA    |
| MSTRG.45962 RTq-PCR forward ( <i>Glyma.10G287600</i> RT-qPCR reverse) | TTGTCCTCGTCTGCCTGTGA    |
| MSTRG.45962 RTq-PCR reverse ( <i>Glyma.10G287600</i> RT-qPCR forward) | GGACGGGTACTTGTCTGATGT   |
| MSTRG.5534 RTq-PCR forward ( <i>Glyma.02G097800</i> RT-qPCR reverse)  | TTGTCCTGGTCTCTGGTGT     |
| MSTRG.5534 RTq-PCR reverse ( <i>Glyma.02G097800</i> RT-qPCR forward)  | GGTTCACCTGAATGGCTTGTG   |
| MSTRG.84397 RTq-PCR forward ( <i>Glyma.19G120900</i> RT-qPCR reverse) | AAGCTACTTTTCTCTTGCTGC   |
| MSTRG.84397 RTq-PCR forward ( <i>Glyma.19G120900</i> RT-qPCR forward) | ACATGAAAAACGCCGAGGTTC   |

<sup>#</sup>The forward primer for antisense transcript was used as the reverse primer for the corresponding sense transcript and *vice versa*.
