# Supplementary material for: The Identification of MATE Antisense Transcripts in Soybean Using Strand-Specific RNA-Seq Datasets
Source: MDPI journal article supplement (doi:10.3390/genes13020228), 2022-01-26
Supplement: s1 [file s1]

**Supplementary Material 1:** Sequences, chromosomal positions, and strand information of *MATE* antisense transcripts identified in *Glycine soja* in this study.

>**Gsoja\_MSTRG.66727.1** GeneID=Gsoja\_MSTRG.66727;Strand=+;Pos=Chr15:8377942-8378384,  
ATAAATGGAACCCAACTGAGGTGAGATAGACCTTCTAATATGAGAAATGAAATGAATGTT  
TACCATTAGGCCATAGGCCGAAGAGCTGAATGCCACTGTTGCCGAGGTTGGCAGCGGCGAG  
TTCGAGGTTTCCGAGGTGGCCGGCGAAGGCGCGAGTAACGTTGGACATGAGGTTGTTGAA  
GACGTAAACGAGGATGGCGGGAGCGGCGAGGGGGAAGAGGAGGTTGAGTTCGATCCATGT  
GGCGGAGAGGATGCGCTTGGACCAGGGTAGGGTGGGGTCAGAGAGGACCTCTTCGAGACG  
GGAATCAGCAGAGTGATGATGATGATGCGTTGAGTTTATCAAGGGTTGGCGTAGTAGGTT  
CTGGTTCTGGGATTCCATCATGTGTGTGTGTGGGGTTGTCGTGTGTGCTGGAACATAGA  
ATGGGGTACTAAATACTGTTGGG

>**Gsoja\_MSTRG.32572.1** GeneID=Gsoja\_MSTRG.32572;Strand=-;Pos=Chr08:4000730-4001052,  
CATGTTTTATGAAATTCATTCTGAAATAGGTAGTCATTTGAGTTGTTATTTTTGTTCTT  
CCACTGGTTACAATGCACAAAAGTTCTATAAATGTATGTCTTTGAAATTCATGGCCCTTC  
CAATCTTTATTCCATTACTTGTTCCTCAATTTGGGGCTGTATACAACAACATTAGTCCTTC  
GGTGGCAGGTTTTGGGATCAGAATGATAAAGCCAATAACCATAAATTGATTAGGGAACTA  
GTTCTGTTTTTGATGCGGTAATACGCTGTCTCTAGTAGTTGGCGGGATGGTTATGAGTT  
CAACTCTCCTTTGAGCTTTCCTT

>**Gsoja\_MSTRG.39211.1** GeneID=Gsoja\_MSTRG.39211;Strand=-;Pos=Chr09:18277715-18278130,  
TGACTGAAAAAAGTAATTTATTTTTCTCATTTGTATACATGCACTCAGAGTTTACATACT  
ACTAACAGTACGAAGAATAATCTTCTAAATACGACAAAATATTACAATAAGCAGAGGATA  
CATCATTAAACAGAGACCATACAGTAAACATAGGCCAAAAAAAAGAAAGATACTTTGAA  
TATAACACTTGCAAGTGTAATGAACCCGTCCAATATAATATAATAAGACTATCACC  
ATAGTTGTATAGTGCATAAATCATGTTTTGAATAAAGACAACCTGGTCCTAAATGGTGAAA  
AGTGATACAAAACATTTTCTGCTCAACAATGAAATTTCTTTGTTAGATGTCATCTCATC  
ATCAAGACATTGAGCGGCCTCTGAGAAAACGCCATGGTCCCGTACCTGTTCCCATC

>**Gsoja\_MSTRG.52475.22** GeneID=Gsoja\_MSTRG.52475;Strand=-;Pos=Chr11:45344733-  
45344898,45345073-45345246,45345421-45345558,45345862-45345960,

GTGGGTAAGATGGAGAGAGTGAGGTTGAGGGAGGGATGGTGGATGGATAGGGCGATGATG  
GGTAGGGTGGTTGAGATGTTGGGGAAGGAGTGTTTGGAGGACTATAAATTGGAGAAGGTG  
TCTTTGGTGGTGTGAAACATAGGGAGGTTGGTTATGAGGGGAAGGAGCATTTGGAGGAC  
TATAAGCAGGAGATGGTGTGTTTTGGAGGAGTAGGAACATTTGGTGGAGTGTAATAGGTG  
AAGGTGTTTTGGGAGGAGTGGGAACATTAGGAGGACTATAAATTGGAGAAGGTGTCTTTG  
GTGGTGTAGGAACATAGGGAGGTTGGTTATGAGGGGAAGGAGCATTTGGAGGACTATAAG  
CAGGAGATGGTGTGTTTTGGAGGAGTAGGAACATTTGGTGGAGTGTAATAGGTGAAGGTG  
TTTTGGGAGGAGTGGGAACATTAGGAGGATTATAAGAAGGAGAAGGTGTTTTGGAGGTG  
TAGGAACATAGGTGGATTGTTACTAGGGGAAGGAGCTTTGGGGGAGTGTACACAGGAG  
AGGGTATTTTTGGAGGCGTTGGAAAATTAGGAGGAGT

>**Gsoja\_MSTRG.15167.1** GeneID=Gsoja\_MSTRG.15167;Strand=-;Pos=Chr04:8803608-8804149,8828564-8828668,

CCGTTACTATTATAGAATTATGTATAGAACTTATTTCTGTCTCACTAATTTCCATCCA  
CGCAACACTTAAAGAAAAAAAAAATGATCCACTCACTTAATAACAAAGAAACCTTGTC  
AGCTAGTTGTTAGCCAGCAATAAAAGATAAGAAAACAAGGAATCAAAGAAATTAATGATG  
ACAGGGTAAATCACGAGCTTCATCACTTTTCTCTCATCTTATCCGTCTCCACAATCCTGC  
AATAAAAAATTGAAAAATATGATTAATTGAACTTTTTCTGTGCTAAAATATGATTAACA  
TCTAATTAATTAGTCTTACTAAAGAATATGTAGTAACACCATAGGTTGGAATTACAAGT  
TATTGTCGGTGCGTGGGGATCTCAAATTCAACTCATGGTAATATAACATAGCTATCCTA  
AAGAATAACCGGGCCTTTAATTTGAATACAACAACAACTTGGTGAATATTGAAAGAAAT  
ATATATATATGCAGCATCCAATACAACGGCAAACTCATAGAATCCAGATTGGTGAATAA  
CAAACACGATCCATTGGCTAAATCAAATGTTAATTGGAGGCTTCAGATTGCCATTGGAG  
TTAGATTTTGACCACTTACTTACACGAAAGCAAGCTTTCTCCTCCTG

>**Gsoja\_MSTRG.32571.1** GeneID=Gsoja\_MSTRG.32571;Strand=-;Pos=Chr08:3999993-4000225,

GAAAGTGATCTGGATCCCATCTAGAAAGCTAGAAAGGGCCAAAAGTGGCATCATGAAT  
GAAACATATCTGATCACTTCTTTGTCATTACTGTAAACATGTCCCAGACATTCCGCACT  
AGAATCATGGCTGAAACTAAAATGACCCCTTCAATTAAGGCCATTGATAACACCACCCGA  
ACTGCTAGACTTGCGGCTTGTGGATTTCCTACTCCCAAGTTCATTGGAGACCCG

>**Gsoja\_MSTRG.52475.8** GeneID=Gsoja\_MSTRG.52475;Strand=-;Pos=Chr11:45344091-45344898,45345073-45345162,45345262-45346448,

TACAACTCACATTGGTAACCATAGATACACAGATTATACGACATAAAATTAATTATGAGA  
CGCGATCTCATTTGTCCAAGTAAAAATATTAGAAAAAATATATAAAAGTGTTACAATTA  
CTATATACTATAACTCAAGTTCCAAAGAAAAGTTTGATTTTTCTAATCAATAGTGGTACTT  
AGAGCAGCACCGACCAGAACTATAACTCAAGTTCCAAAAAAAAGTTTGATTTTTCTAACC  
AAGAGTGGTGCTTAGAGCAGCACCGACCAGAATGGTTAGTGAATACACTCCAAACCGCGA  
CGGCGTTATAGACGACGCACCGTTTAGTCTGGCTGGCGTCGTTTCGTTGACGACGACGG  
CGTTTGAGATGATCCCGACGACGACGACGGCGAGGGGGTTGTTGCCGCCGACGACGGTAA  
TGGCGGCGATGTTGCCGGGGTGAGGGAGGAAGAGGGTGGGTAAAGTGGGTGGTGAGTTGA  
AGCAGAAGGTGGGTAAAGATGGAGAGAGTGAGGTTGAGGGAGGGATGGTGGATGGATAGGG  
CGATGATGGGTAGGGTGGTTGAGATGTTGGGGAAGGAGTGTTTGGAGGTGTTGGATTAAT  
GTAAGGTGGTTGAGATGTTGGGGAATGAGAGTTTGGAGGTGCTGCAATGGAAGGAGGTTG  
GGAAGTGGGTGAAGGAGTGGTGTTTGGAGGTGTGGGAATGTAAGGTGGTTGAGATGTTGG  
AGATGGGGTTATTGGAACAAAGGGTGGTTGATGGGCAGGGGAAGGCGTTTTTGGAGGGGT  
TGGAGTGTAGGGAGGTTGAGAAATAGGAGAAGGAGTGTTTGGAGGAGTTGGGACATAAGG  
TTGGTTGCCAGGGGGAGGTGTTTTTGGAGTAGTAGTGGGAACATTTGGAGGACTATAAAT  
TGGAGAAGGTGTCTTTGGTGGTGTTGAAACATAGGGAGGTTGGTTATGAGGGGAAGGAGC  
ATTTGGAGGACTATAAGCAGGAGATGGTGTTTTTGGAGGAGTAGGAACATTTGGTGGAGT  
GTAAATAGGTGAAGGTGTTTTGGGAGGAGTGGAACATTAGGAGGATTATAAGAAGGAGA  
AGGTGTTTTTGGAGGTGTAGGAACATAGGGAGGTTGGTTATGAGGGGAAGGAGCATTGG  
AGGACTATAAGCAGGAGATGGTGTTTTTGGAGGAGTAGGAACATTTGGTTGGTTATGAGG  
GGAAGGAGCATTGGAGGACTATAAGCAGGAGATGGTGTTTTTGGAGGAGTAGGAACATT  
TGGTGGAGTGTAATAGGTGAAGGTGTTTTGGGAGGAGTGGAACATTAGGAGGATTATA  
AGAAGGAGAAGGTGTTTTTGGAGGTGTAGGAACATAGGGTGGATTGTTACTAGGGGAAGG  
AGCTTTTGGGGGAGTGACACAGGAGAGGGTATTTTTGGAGGCGTTGGAAAATTAGGAGG  
AGTATAAACTGGGGAAGGAGTTGTGGAGGAGTTGGAATATATGGAGGATGATTAGCAGG  
TGAAGGTGCTTGAGTGGGAACATTGGGAGGAGTGATACAGGGGAAGGAGTTTTTGGAGG  
TGTTGGAACATTAGGTGGATAATGAATAGGTGAAGGTGGTTTTGGATGAACATAGGGAGG  
GCTGGAAATAGGTGAAGGTGTTTTAGGAGGAGGTATTGGAACATAGGGTGGATGATAAGG  
AGTTTCTGGAGGAGTTGGAACAGTTGGAGTTTGGAGGAGTGCTGGAACATAAGGTGCTCT  
CGGAGGAGTAATTGGAACATAAGGAGTGTTTGGAGGGGTGGAACATAAGGTGGATTTGG  
ATGATAAGGTGCTTTTGGAGGAGTAATTGGAACGTAAGGAGTGTTTGGAGGTGTCGGAGA

ATAATAAGGAGGTGGCTCTCTCACAGCCAACACCACAATAATCAATTTCTGACCCTTCTC  
ACAATTATCATCTTTCCCACTAATGAAGTAAAATGGACCCGATCTATCAAACCTGAAACTC  
CGAGTCACCATCCTCAAACCTTCTTGATCGGGTCTTCTTGTTACATTTCTCATAATCATC  
ATTGTTCAACCAACACAGTATCTGAGTCCTTCTTGACTTAAA

>**Gsoja\_MSTRG.52475.5** GenelD=Gsoja\_MSTRG.52475;Strand=-;Pos=Chr11:45344091-  
45344832,45345007-45345162,45345337-45346476,

AACAACAAAAGAATTTGATGATAATTATTACAACCTCACATTGGTAACCATAGATACACAG  
ATTATACGACATAAAATTAATTATGAGACGCGATCTCATTTGTCCAAGTAAAAATATTAG  
AAAAAATATATAAAAGTGTTCACAATTACTATATACTATAACTCAAGTTCCAAAGAAAGT  
TTGATTTTTCTAATCAATAGTGGTACTTAGAGCAGCACCGACCAGAACTATAACTCAAGT  
TCCAAAAAAAAGTTTGATTTTTCTAACCAAGAGTGGTGCTTAGAGCAGCACCGACCAGAA  
TGGTTAGTGAATACACTCCAAACCGCGACGGCGTTATAGACGACGACCGTTTAGTCTGG  
CTGGCGTCGTTTCGTTGACGACGACGGCGTTTGAGATGATCCCGACGACGACGACGGCG  
AGGGGGTTGTTGCCGCCGACGACGGTAATGGCGGCGATGTTGCCGGGGTGAGGGAGGAAG  
AGGGTGGGTAAGTGGGTGGTGCAGTTGAAGCAGAAGGTGGGTAAGATGGAGAGAGTGAGG  
TTGAGGGAGGGATGGTGGATGGATAGGGCGATGATGGGTAGGGTGGTTGAGATGTTGGGG  
AAGGAGTGTTTGGAGGTGTTGGATTAATGTAAGGTGGTTGAGATGTTGGGAATGAGAGT  
TTGGAGGTGCTGCAATGGAAGGAGGTTGGGAAGTGGGTGAAGGAGTGGTGTGTTGGAGGTG  
TGGAATGTAAGGTGGTTGAGATGTTGGAGATGGGGTTATTGGAACAAAGGGTGGTTGAT  
GGGCAGGGGAAGGCGTTTTTGGAGGGGTTGGAGTGTAGGGAGGTTGAGAAATAGGAGAAG  
GAGTGTTTGAGGGAGTTGGGACATAAGGTTGGTTGCCAGGGGGAGGTGTTTTTGGAGTAG  
TAGTGGGAACATTTGGAGGACTATAAATTGGAGAAGGTGTCTTTGGTGGTGTGAAACAT  
AGGGAGGTTGGTTATGAGGGGAAGGAGCATTGAGGACTATAAGCAGGAGATGGTGTTT  
TTGGAGGAGTAGGAACATTTGGTGGAGTGTAATAGGTGAAGGTGTTTTGGGAGGAGTGG  
GAACATTAGGAGGATTATAAGAAGGAGAAGGTGTTTTTGGAGGTGTAGGAACATAGGGAG  
GTTGGTTATGAGGGGAAGGAGCATTGAGGACTATAAGCAGGAGATGGTGTTTTTGGAG  
GAGTAGGAACATTTGGTGGAGTGTAATAGGTGAAGGTGTTTTGGGAGGAGTGGAACAT  
TAGGAGGATTATAAGAAGGAGAAGGTGTTTTTGGAGGTGTAGGAACATAGGGTGGATTGT  
TACTAGGGGAAGGAGCTTTTGGGGGAGTGACACAGGAGAGGGTATTTTTGGAGGCGTTG  
GAAAATTAGGAGGAGTATAAACTGGGGAAGGAGTTTGTGGAGGAGTTGGAATATATGGAG

GATGATTAGCAGGTGAAGGTGCTTGAGTGGGAACATTGGGAGGAGTGTATACAGGGGAAG  
GAGTTTTTGGAGGTGTTGGAACATTAGGTGGATAATGAATAGGTGAAGGTGGTTTTGGAT  
GAACATAGGGAGGGCTGGAAATAGGTGAAGGTGTTTTAGGAGGAGGTATTGGAACATAGG  
GTGGATGATAAGGAGTTTCTGGAGGAGTTGGAACAGTTGGAGTTTGAGGAGGTGCTGGAA  
CATAAGGTGCTCTCGGAGGAGTAATTGGAACATAAGGAGTGTGGAGGGGTGGAACAT  
AAGGTGGATTTGGATGATAAGGTGCTTTTGGAGGAGTAATTGGAACGTAAGGAGTGTG  
GAGGTGTCGGAGAATAATAAGGAGGTGGCTCTCTCACAGCCAACACCACAATAATCAATT  
TCTGACCCCTTCTACAATTATCATCTTTCCCACTAATGAAGTAAAATGGACCCGATCTAT  
CAAACGAAACTCCGAGTCACCATCCTCAAACCTTCTGATCGGGTTCTTCTGTACATT  
TCTCATAATCATCATTGTTACACCACCAACACAGTATCTGAGTCCTTCTGTACTTAA

>**Gsoja\_MSTRG.79813.1** GeneID=Gsoja\_MSTRG.79813;Strand=+;Pos=Chr18:23010953-  
23011524,23012138-23012817,

AGATAATTAACCAGAGCATGACAGCAGAGGCAAGAGAGAGACGAACAAAGCCCCAAAGAT  
TGTGAAAGGCTTTGAAGGTAAAGCCAGACCAGGCCTCCCCGAGGCCCCACCCATTATAT  
AAACGAGCTGCGCAAGGTGATGAACCACCACGACGCGTTCAGCACCACGGCAGCGCCGA  
CGAGCCCCACCGGAGCTTCAGCATGAGCAGCCAGCTGAACACGGTGTGCAGCACCAGCG  
CCGCCGCCGAATCCACGCCATCACCATGATCCTGCTCTGCGCCTGCAGGAACTTCTGCG  
CCGGGTAGTTCACCGGTACGCGAACAGCTGCGGGATCATCCACACCGCGAAATCCCCCG  
CCGCCGCCGAAATCGCCTCCGTCTGCCCTATCGCCGCAGCAGCGCGCCGCGAAGATGT  
AGAGGAGCGTCAGCAGGATCGCGGTGGCGTTCAGGATCACCCACGAGCGCTGCATGTACA  
CGCCCAGCATGTGCACTTGCCCCGCTCCGTACGCTTGTCACATAGCGTTTCCAACGCGC  
TTCCCATTCCAAAGTGCAGCGCAAAGTCCACAATGATGCCAAGGCAGAAGCCGGCGATGAC  
GGAGTTTTCAATGGAGATGGCGGCGAGGGCGAGGGTGCTGACGTGGCCGGAGAAGACTTG  
GGTGACGGCGCCGAGGGAGTACTGGCAGACGGAGGTGAAGATGGCGGGGCCGGCGAGGTA  
CCAGAGCTTCTTCTGACTCGGCGAAGAACTCTCTGGCGAAGTCGCCGGCGCCGGCGATCGG  
AGCGATGTCATCGGATTTGCGCGTGAAGACGACGGCGGGGTCCGGTGTGTGGTGTGCGGG  
CGTGAGAAGTGGGTGAGTTTGGTCCTCATGGTCTCCATCGTGAATTCGTGATATGAATC  
AGAGATACGAAAAAATTGAAAAATTCTAGAACAACCTTTATAAAGAAAAAGTTCCGGCCTTC  
AGAGCAGGTTTTTACTGTTACCCAATGTAATGCCACACTCCGTCATCGGTTTCGAAAAAGG  
AGATAAAAGTAAAAAGGATAGGGAGAAAAATCAATCATAATGTCACGGAAAGTAGATAAA

AAAACATAGTGACAAAATAAAATTATTTTAAAGTTTAGGGTTATAACTTTTTTCCAGAG  
TTTAGGGTTATAGTTGAAACGCCATAGTTGCTATAAAATATTTTATTCGCAATTGTCCGG  
TTCTCATGTAAGAAAAAGTATTGTTTCATGTCATTTAAAAGATAGTTTTAGCC

>**Gsoja\_MSTRG.52475.15** GeneID=Gsoja\_MSTRG.52475;Strand=-;Pos=Chr11:45344112-  
45344898,45345073-45345162,45345337-45346411,

ACGACATAAAATTAATTATGAGACGCGATCTCATTTGTCCAAGTAAAAATATTAGAAAAA  
ATATATAAAAGTGTTCACAATTACTATATACTATAACTCAAGTTCCAAAGAAAGTTTGAT  
TTTTCTAATCAATAGTGGTACTTAGAGCAGCACCGACCAGAACTATAACTCAAGTTCCAA  
AAAAAAGTTTGATTTTTCTAACCAAGAGTGGTGCTTAGAGCAGCACCGACCAGAATGGTT  
AGTGAATACACTCCAAACCGCGACGGCGTTATAGACGACGACCGTTTAGTCTGGCTGGC  
GTCGTTTCGTTTCGACGACGACGGCGTTTGAGATGATCCCGACGACGACGACGGCGAGGGG  
GTTGTTGCCGCCGACGACGGTAATGGCGGCGATGTTGCCGGGGTGAGGGAGGAAGAGGGT  
GGGTAAGTGGGTGGTGCAATTGAAGCAGAAGGTGGGTAAGATGGAGAGAGTGAGGTTGAG  
GGAGGGATGGTGGATGGATAGGGCGATGATGGGTAGGGTGGTTGAGATGTTGGGGAAGGA  
GTGTTTGGAGGTGTTGGATTAATGTAAGGTGGTTGAGATGTTGGGGAATGAGAGTTTGA  
GGTGCTGCAATGGAAGGAGGTTGGGAAGTGGGTGAAGGAGTGGTGTGTTGGAGGTGTGGGA  
ATGTAAGGTGGTTGAGATGTTGGAGATGGGGTTATTGGAACAAAGGGTGGTTGATGGGCA  
GGGGAAGGCGTTTTTGGAGGGGTTGGAGTGAGGGAGGTTGAGAAATAGGAGAAGGAGTG  
TTTGAGGGAGTTGGGACATAAGGTTGGTTGCCAGGGGGAGGTGTTTTTGGAGTAGTAGTG  
GGAACATTTGGAGGACTATAAATTGGAGAAGGTGTCTTTGGTGGTGTGAAACATAGGGA  
GGTTGGTTATGAGGGGAAGGAGCATTTGGAGGACTATAAGCAGGAGATGGTGTGTTTTGGA  
GGAGTAGGAACATTTGGTGGAGTGTAATAGGTGAAGGTGTTTTGGGAGGAGTGGAACA  
TTAGGAGGATTATAAGAAGGAGAAGGTGTTTTTGGAGGTGTAGGAACATAGGGAGGTTGG  
TTATGAGGGGAAGGAGCATTTGGAGGACTATAAGCAGGAGATGGTGTGTTTTGGAGGAGTA  
GGAACATTTGGTGGAGTGTAATAGGTGAAGGTGTTTTGGGAGGAGTGGAACATTAGGA  
GGATTATAAGAAGGAGAAGGTGTTTTTGGAGGTGTAGGAACATAGGGTGGATTGTTACTA  
GGGGAAGGAGCTTTTGGGGGAGTGACACAGGAGAGGGTATTTTTGGAGGCGTTGAAAAA  
TTAGGAGGAGTATAAACTGGGGAAGGAGTTTGTGGAGGAGTTGGAATATATGGAGGATGA  
TTAGCAGGTGAAGGTGCTTGAGTGGGAACATTGGGAGGAGTGATACAGGGGAAGGAGTT  
TTTGGAGGTGTTGGAACATTAGGTGGATAATGAATAGGTGAAGGTGGTTTTGGATGAACA

TAGGGAGGGCTGGAAATAGGTGAAGGTGTTTTAGGAGGAGGTATTGGAACATAGGGTGGATGATAAGGAGTTTCTGGAGGAGTTGGAACAGTTGGAGTTTGAGGAGGTGCTGGAACATAAGGTGCTCTCGGAGGAGTAATTGGAACATAAGGAGTGTTTGGAGGGGTGGAACATAAGGTGGATTTGGATGATAAGGTGCTTTTGGAGGAGTAATTGGAACGTAAGGAGTGTTTGGAGGTGTCGGAGAATAATAAGGAGGTGGCTCTCTCACAGCCAACACCACAATAATCAATTTCTGACCTTCTCACAATTATCATCTTTCCCACTAATGAAGTAAAATGGACCCGATCTATCAAAC TGAAACTCCGAGTCACCATCCTCAAACCTTCTTGATCGGGTTCTTCTTGTTACATTTCTCA TAATCATCATTGTTACCACCAACACAGTATC

>**Gsoja\_MSTRG.40295.1** GeneID=Gsoja\_MSTRG.40295;Strand=+;Pos=Chr09:38832874-38833374,

TGAAATCGTAACGCGACCACGACTGATATTTAAACCTTGGTTCCCACCCATCCATCAGT TTAAACTTATGAAGGAAAAGAGAACTAACATACCAATAAACTGAAACCTGTGACAGAGGC AAAAGAAGTGGCCATGGAAGCACCAGAGAGAGACAACCTCGCCAAGATGGCCAACAAACAT GACAGATATGATACTGAGGCCAAAAATTCAAAAGGGTCACTGATATCAAAGGCCCTGCAAG CCATAACTGCTTCTTCACTTCTTCTATAACTTCCCTTCTCTCAATACCCCTCCCTGATGA TGATGAGTGTGAGTGCTTAATCAATGGAGACTGAAGAGATGCACTTTGGTTTTGGTCTCC TCTCTCCATTTCTTCTTTGTTGCTCTTTAAGTTCTTAACACATGGAAGACTCAGACAG AGAAAAATGTTGCATATTGCATGGTGTGTTAAAAAGATTATAAAAAACATCTGAAAAACT CTAGATAAAGGCGGAACTGGA

>**Gsoja\_MSTRG.52475.9** GeneID=Gsoja\_MSTRG.52475;Strand=-;Pos=Chr11:45344091-45345072,45345421-45346429,

CATAGATACACAGATTATACGACATAAAATTAATTATGAGACGCGATCTCATTTGTCCAA GTAAAAATATTAGAAAAAATATATAAAAGTGTTACAATTACTATATACTATAACTCAAG TTCCAAAGAAAGTTTGATTTTTCTAATCAATAGTGGTACTTAGAGCAGCACCGACCAGAA CTATAACTCAAGTTCAAAAAAAAGTTTGATTTTTCTAACCAAGAGTGGTGCTTAGAGCA GCACCGACCAGAATGGTTAGTGAATACACTCCAAACCGCGACGGCGTTATAGACGACGCA CCGTTTAGTCTGGCTGGCGTCGTTTCGTTGACGACGACGGCGTTTGAGATGATCCCGAC GACGACGACGGCGAGGGGGTTGTTGCCGCCGACGACGGTAATGGCGGCGATGTTGCCGGG GTGAGGGAGGAAGAGGGTGGGTAAAGTGGGTGGTGCAATTGAAGCAGAAGGTGGGTAAAGAT GGAGAGAGTGAGGTTGAGGGAGGGATGGTGGATGGATAGGGCGATGATGGGTAGGGTGGT

TGAGATGTTGGGGAAGGAGTGTGGAGGTGTTGGATTAATGTAAGGTGGTTGAGATGTT  
GGGGAATGAGAGTTTGGAGGTGCTGCAATGGAAGGAGGTTGGGAAGTGGGTGAAGGAGTG  
GTGTTTGGAGGTGTGGGAATGTAAGGTGGTTGAGATGTTGGAGATGGGGTTATTGGAACA  
AAGGGTGGTTGATGGGCAGGGGAAGGCGTTTTTGGAGGGGTTGGAGTGTAGGGAGGTTGA  
GAAATAGGAGAAGGAGTGTGGAGGGAGTTGGGACATAAGGTTGGTTGCCAGGGGGAGGT  
GTTTTTGGAGTAGTAGTGGGAACATTTGGAGGACTATAAATTGGAGAAGGTGTCTTTGGT  
GGTGTGAAACATAGGGAGGTTGGTTATGAGGGGAAGGAGCATTGGAGGACTATAAGCA  
GGAGATGGTGTGTTTTGGAGGAGTAGGAACATTTGGTGGAGTGTAATAGGTGAAGGTGTT  
TTGGGAGGAGTGGGAACATTAGGAGGATTATAAGAAGGAGAAGGTGTTTTTGGAGGTGTA  
GGAACATAGGGAGGTTGGTTATGAGGGGAAGGAGCATTGGAGGACTATAAGCAGGAGAT  
GGTGTGTTTTGGAGGAGTAGGAACATTTGGTGGAGTGTAATAGGTGAAGGTGTTTTGGGA  
GGAGTGGGAACATTAGGAGGATTATAAGAAGGAGAAGGTGTTTTTGGAGGTGTAGGAACA  
TAGGGTGGATTGTTACTAGGGGAAGGAGCTTTGGGGGAGTGACACAGGAGAGGGTATT  
TTTGGAGGCGTTGGAAAATTAGGAGGAGTATAAACTGGGGAAGGAGTTTGTGGAGGAGTT  
GGAATATATGGAGGATGATTAGCAGGTGAAGGTGCTTGAGTGGGAACATTGGGAGGAGTG  
TATACAGGGGAAGGAGTTTTTGGAGGTGTTGGAACATTAGGTGGATAATGAATAGGTGAA  
GGTGGTTTTGGATGAACATAGGGAGGGCTGGAAATAGGTGAAGGTGTTTTAGGAGGAGGT  
ATTGGAACATAGGGTGGATGATAAGGAGTTTCTGGAGGAGTTGGAACAGTTGGAGTTTGA  
GGAGGTGCTGGAACATAAGGTGCTCTCGGAGGAGTAATTGGAACATAAGGAGTGTGTTGA  
GGGGTTGGAACATAAGGTGGATTTGGATGATAAGGTGCTTTTGGAGGAGTAATTGGAACG  
TAAGGAGTGTGTTGGAGGTGTCGGAGAATAATAAGGAGGTGGCTCTCTCACAGCCAACACC  
ACAATAATCAATTTCTGACCCTTCTCACAATTATCATCTTTCCCACTAATGAAGTAAAT  
GGACCCGATCTATCAAACCTGAAACTCCGAGTCACCATCCTCAAACCTTCTTGATCGGGTTC  
TTCTTGTTACATTTCTCATAATCATATTGTTACACCACCAACACAGTATCTGAGTCCTTC  
TTGTACTTAAA

>**Gsoja\_MSTRG.40292.1** GeneID=Gsoja\_MSTRG.40292;Strand=+;Pos=Chr09:38829349-38829867,  
AGAGGTTAAGATAGAATATGAAATAAGAAAATATTCCATTAGTGCATCAAATGACTTATT  
ACAACAAGATAAAATAATTGTACTACTCTATTCTATCCGAAACTTAGTTTACAGTCACAA  
AATTACCCCTAATATAACCAACCATAGACTCACCAGTGGGGCAATGAGAAAAATTGAAAG  
GTTTTCAATAACTAGATCAAAATCACATTTAGTATCTTCTACACAAGAACATAATCTTTT



CCCTCCAAAAACATCAAGACGTCCCCTACCAACACATACATAAAAAATAAAATAATAAAA  
CCACTTTATTCACTTCCAATGGCCAACTGCATCATCTATCATCTTTCGCGCATATATAAT  
TGCCCCTAGACTTTTCTGCCAAAAGAAGGATACCAAACATGTATTGTTTTCATCCAAAT  
AGAATTTAACTCAGAATGTGCAACTGCAACGATATTGCATCTTCATGAACTAAGCTCTC  
AAGTGTTACTGAATTATAGACTCTATCTGTTGCTTTCTT

>**Gsoja\_MSTRG.65597.1** GeneID=Gsoja\_MSTRG.65597;Strand=-;Pos=Chr15:2792958-2793198,  
GCCCAGCAACAGCCAGACCATCCGCAAGAAGAGACACTGCCAACCAACCTGCAGACATA  
CTTGAAATGCAGCCATAGATGTTGGCCCCTGCCGTGCAGCTAGTGATGCAGCCAGTGTCA  
CACAGAATGTTACAGCGATGACTCTCATTAAATAATAGAAAACCTGGATGACAACAACAAT  
ATAGGGAAGGACAAAGATGGTGTCAAGTCTCAATACTAAAGTGTTAGTAAACCTAAACAG  
A

>**Gsoja\_MSTRG.15162.1** GeneID=Gsoja\_MSTRG.15162;Strand=-;Pos=Chr04:8777225-8778120,  
GAAAGTTTGAAGAATTCCCAAAGGCCAACAAAAGCTTCAACAGAAAAACAGTCCACGAG  
CGAGGGCAACCACCAAAGAGTGTATACCCGAGCATTCCCAAACAGAGAGCCACCACGAG  
AAACCAATGGAAAGAGCAGTGCCAACAATCCCAATTCTCATCTATAAACAAAAACCCAA  
CTCACTAACACGTGAACCGCAAGAGCCACCCCTGAAACCCAAGCAATGATGCCGGTCTTC  
AACTGGCACTGCAGGAACCGCTGCAAAGTGAAGTGAACGGGAAGCTCAGGTGCAATGGG  
ATCAACCAAACCGCCACCAGCCCCGCTGCTCCGCCACCGCGACGGGCTGCCCTATTAGC  
TTCAACACCGGCGTCGAAAAATGAACACCGGCAACAACAGAATGGAAGACAGGAACAGA  
ACAACCCACGAGCGTTGCAAATAAACGCCCAATATGCGCTGTTGTCCGGCGCCGTACGCC  
TGCCCGCATAGTGTCTCAAGCGCACTCGCCATACCCAATAAAAAAGGAATAAGTTCGTT  
AACAAAAATTAATACTAACTAACGACTAACACAATAATGCGGTGAATGAAAAGTGGGAAAT  
AGTGAATGAAAAGTGGTAAGTGGAAAGTGTTACCAAGAAACCGAAGGTGATGGAGATGAG  
GACGGTGCAGGCGATGGAAATGGCGGCGAGGTCGAGATCGCCGAGGTGGCCGGCTAAGGA  
CTGGGTGACGACGGTGATGGAGAACATGGCGAGGCGGGTGAAGATGGAGGGGGCAGCGAT  
GTGCCATAGCTTCTTGATTGGAACATGATCGTTGGAAGAGAGAGTGATTGTTGGATCC  
GTGTGGTTGTGGTGGCAGTGTTGACTTTATCAGAGGATGCTCATGCTCTTCTTCAT

>**Gsoja\_MSTRG.52475.28** GeneID=Gsoja\_MSTRG.52475;Strand=-;Pos=Chr11:45344746-45344898,45345247-45345354,45345529-45345654,45345862-45346016,

TGCCGGGGTGAGGGAGGAAGAGGGTGGGTAAGTGGGTGGTGCAGTTGAAGCAGAAGGTGG  
GTAAGATGGAGAGAGTGAGGTTGAGGGAGGGATGGTGGATGGATAGGGCGATGATGGGTA  
GGGTGGTTGAGATGTTGGGGAAGGAGTGTTTGGAGGTTGAGAAATAGGAGAAGGAGTGTT  
TGAGGGAGTTGGGACATAAGGTTGGTTGCCAGGGGGAGGTGTTTTGGAGTAGTAGTGGG  
AACATTTGGAGGACTATAAATTGGAGAAGGTGTCTTTGGTGGTGTAGGAACATAGGGAGG  
TTGGTTATGAGGGGAAGGAGCATTGAGGACTATAAGCAGGAGATGGTGTGTTTTGGAGG  
AGTAGGAACATTTGGTGGAGTGTAATAGGTGAAGGTGTTTTGGGAGGAGTGGGAACATT  
AGGAGGATTATAAGAAGGAGAAGGTGTTTTGGAGGTGTAGGAACATAGGGTGGATTGTT  
ACTAGGGGAAGGAGCTTTTGGGGGAGTGACACAGGAGAGGGTATTTTTGGAGGCGTTGG  
AA

>**Gsoja\_MSTRG.52475.29** GeneID=Gsoja\_MSTRG.52475;Strand=-;Pos=Chr11:45344746-45344832,45345007-45345102,45345355-45345366,45345463-45345654,45345862-45346016,

TGCCGGGGTGAGGGAGGAAGAGGGTGGGTAAGTGGGTGGTGCAGTTGAAGCAGAAGGTGG  
GTAAGATGGAGAGAGTGAGGTTGAGGGAGGGATGGTGGATGGATAGGGCGATGATGGGTA  
GGGTGGTTGAGATGTTGGGGAAGGAGTGTTTGGAGGTTGAGAAATAGGAGAAGGAGTGTT  
TGAGGGAGTTGGGACATAAGGTTGGTTGCCAGGGGGAGGTGTTTTGGAGTAGTAGTGGG  
AACATTTGGAGGACTATAAATTGGAGAAGGTGTCTTTGGTGGTGTGAAACATAGGGAGG  
TTGGTTATGAGGGGAAGGAGCATTGAGGACTATAAGCAGGAGATGGTGTGTTTTGGAGG  
AGTAGGAACATTTGGTGGAGTGTAATAGGTGAAGGTGTTTTGGGAGGAGTGGGAACATT  
AGGAGGATTATAAGAAGGAGAAGGTGTTTTGGAGGTGTAGGAACATAGGGTGGATTGTT  
ACTAGGGGAAGGAGCTTTTGGGGGAGTGACACAGGAGAGGGTATTTTTGGAGGCGTTGG  
AA

>**Gsoja\_MSTRG.57214.2** GeneID=Gsoja\_MSTRG.57214;Strand=-;Pos=Chr12:39967237-39967640,39967716-39968346,

GAATCAAGAGCCAACTCAGGATTAGGGAGAAGCCCCGCGAGCAAAACCAGAATCTGAAAG  
TACCATGTCTCCAGGCACAGCATGACCGCGGACGCAGCGGAGAGCTTGAAGAACCCATAC  
AAACCGCTAAACGCCTCCACGTGAACCCCTGCCACGTGCGCCTGCACCTCTCGCTCTTC  
ACTATGTACACGTACTGTCCAATCACCATTATCCACCACGACAGGCTCAGCACCAGCGAC

GCCCCAACAGCCCCAACCAATCTCGTACACCGCCACCAACTCATCCCCAGGTGGACC  
ACCAGCGTCGCCGCTGATATGTACGCGCTCGGTGCCACTATGCTCTGCGCTTGGAGAAAC  
TTCTGGATCGGGAAGTTCGCCGCGTATGCGAATATCTGTGGGATCAACCCGTACACAAAG  
AGTGCTGCCGCCGACGCGATTCTCGGTGATTCCCCGAGGAATATTAGCATCGGTTGCTG  
AATACGTATATCACGGTCAACACTACGCCGGCTAGTGAGAGAAGAATCGTTGACCGCTGC  
ATGTAGACTCCTAACATCCCGTACTTTTGAGCTCCGAATGCTTGCCGCATAGCGTCTCC  
ACGGCACTCCCCATACCAACTGCAAGTAATCATGAGGCCGTAGGCGAACATTTGGATGC  
CGGTGTTGCCGAGGGAGGCGGCGGCGAGTTCGAGGTTGCCGAGGTGGCCGGAGAAGATTT  
GGGTGGACATGGACATGAGGTAGTTGATGAGGTAGACGATGACGGCAGGGGCGGCGAGGA  
AGAAGAGGAGCTTCAACTCGATCCACGTGGCGGGTCCCACACGGTTGAGGAAGGGTAGGG  
TGTCGTCGGAGAGAATTCTCTCAAGTTGCCCATGGGAGGAGGACTCGTGCTTTGAGTTTG  
ATCGAGTTCCTCCGCTGTAAACAGTGGCTCTTCTCCGCTGAACCCATTGATCTCGATC  
CGAATTCACGGCAAAGAAGGCTTCTCTCCTGTAACGTTTGGAGCAGCAGCAATCTCGCC  
GCCACAAGTCCCAAC

>**Gsoja\_MSTRG.52475.19** GeneID=Gsoja\_MSTRG.52475;Strand=-;Pos=Chr11:45344518-  
45344706,45344755-45344898,45345073-45345162,45345511-45345792,45345841-45345929,

AGGGATGGTGGATGGATAGGGCGATGATGGGTAGGGTGGTTGAGATGTTGGGGAAGGAGT  
GTTTGGAGGTGTTGGATTAATGTAAGGTGGTTGGGAAGTGGGTGAAGGAGTGGTGTTGG  
AGGTGTGGGAATGTAAGGTGGTTGAGATGTTGGAGATGGGGTTATTGGAACAAAGGGTGG  
TTGATGGGCAGGGGAAGGCGTTTTTGGAGGGGTGGAGTGTAGGGAGGTTGAGAAATAGG  
AGAAGGAGTGTTTGGGGAGTTGGGACATAAGGTTGGTTGCCAGGGGGAGGTGTTTTTGG  
AGTAGTAGTGGGAACATTTGGAGGACTATAAATTGGAGAAGGTGTCTTTGGTGGTGTGA  
AACATAGGGAGGTTGGTTATGAGGGGAAGGAGCATTGGAGGACTATAAGCAGGAGATGG  
TGTTTTTGGAGGAGTAGGAACATTTGGTGGAGTGTAATAGGTGAAGGTGTTTTGGGAGG  
AGTGGGAACATTAGGAGGATTATAAGAAGGAGAAGGTGTTTTTGGAGGTGTAGGAACATA  
GGGTGGATTGTTACTAGGGGAAGGAGCTTTTGGGGGAGTGACACAGGAGAGGGTATTTT  
TGGAGGAGTTGGAATATATGGAGGATGATTAGCAGGTGAAGGTGCTTGAGTGGGAACATT  
GGGAGGAGTGATACAGGGGAAGGAGTTTTTGGAGGTGTTGGAACATTAGGTGGATAATG  
AATAGGTGAAGGTGGTTTTGGATGAACATAGGGAGGGCTGGAAATAGGTGAAGGTGTTTT  
AGGAGGAGGTATTG

>**Gsoja\_MSTRG.5529.1** GeneID=Gsoja\_MSTRG.5529;Strand=+;Pos=Chr02:7817334-7817573,

ACACAAAACCTCCTAGAAAGCCATCCACCATGAAAGAGAGACAAAGCACAGGAACTATCTT  
TGCAACATAATGTACAACCTTCATCTCATTGCTAAATGCAAATCCCAACACATGACGGAA  
GCAAAAGAGAACAGAGCTAAAGACAACCTGCATCCGTGAATGCTAGAACAATTACAGCAAA  
AACAGCCTCTCGCGCTGCCTGTGGTCTTCGTGCCCCTAATTCATTCGAAACCCGGGTACT

>**Gsoja\_MSTRG.28717.1** GeneID=Gsoja\_MSTRG.28717;Strand=-;Pos=Chr07:9578514-9578773,

GGTTTGTAGGAACTTAGTAATGCACCGAAGAAGACCATTGGCCGAAAGGCTTGGGATCAA  
GTATCTGGCATATAGTTGAGCATGTGCAGCAATTTCTTTGTCTTGATGGAGAGCAACTAG  
AATAGGCCCTAAGAATACCCAAATAATGGAGAGGGGTATGGTAACAAGGGTGAGAACCAA  
CATGGCACCTTGGGTGTGTACACCAAGCATGTGAAACTGCTTTGCTCCATATGCTTGACC  
ACAAAATGTGTCTAGTGCGC

>**Gsoja\_MSTRG.29212.1** GeneID=Gsoja\_MSTRG.29212;Strand=-;Pos=Chr07:14875254-14877261,

AATTAATTCCTTTAATAAATATAAGAATTATTACAAAAGAAAAGAATATTACACCGTC  
AATCAACAATCATCATAATTTTTTTTTTTTTTTTATCAAGAGTTGTTGTTGTCCACAGCG  
GCAAGCAACGGTTGTTTGTGGCCGTGCGATCCTTGATCAAGGGCCGTGAGTAACTGGGCC  
CGGCAGGCCTGGTACTCCCAATCGGTGGTCCCAATCATATACAACATTAGGCCCGCGCAA  
CAAACCTGGGCCGACAACAGGCCAGCCAGAGCCACAGAACCCAACTCGAGCCAGAAC  
GCAAGCCCAACCGCCACCGGCATCCCCACCAGATAAAACGCTCCCAGGTTACGTTGCGC  
GCCACGTTGCGCCGCGCGTCCCCCTACCACCCCGCATCCCACCGTCTGCGGGCAGTTT  
CCGAGCTCGCACAACCCAGAATCGGCAGCGCCGCTGCCGTGAGCCGAGAAATCCCCTCG  
TCCCCGGTGAACATCCTCCCCACCTCCTCCGCATCGCCGTCGAAAAACCACCGCGGAG  
AAGCCCATCACTGCGGCGAAGAACACCGCTACCACCGCCGACATCCTGGCGCGTGACCC  
CTGTTGCGGCCAAGCTGGTTCCCCACGCGCGTGGAACCGCAAATCCCAGAGACGAGGGG  
AAGACATAGATCAACGACGTCGTCTGGATTAATCCCATAGCCGCCACGCTGGCAGTG  
GGGTCCACCAAACCCACACAACAAATCATAATCTCATACCACCACCATTCAAACAA  
ACCGAGACGCAGCTCGGCGCCGCAAGCCTAAGCAGCGGCTCCCAGCCGCCGAAACTCC  
CGGCTCGGCGCGGTCCACGTGGCCAGGTGGACCCACTTATCCACACGTAGAGGACCAGC  
AGACTTAGAATGGAAAACTGGAGGCGGCGGAGGCGGCGGACGCCGGGCAGGCCGCGC  
TGGACGAGGAGCAAGTTGAATGGAACGTGGAGGAGAGTGCCGGCGAGGGACGCTAACGTT

ACCGGGTGGGTGATGTTCTGGGCGCGAAGGTAGACTCTGATTGGGTGGAGGAAGGAGTTG  
GTGACGAGGTCGGGGAGAAGGAAAACTAAATAGGTTTGTGCCATTTGGGTGATGTGTGTG  
TGTTGGTGGAGTAGGATAAAGACTTTAGACATGTTAAGCCACAAGAGCGAAAATGGGGATT  
GAAGAGAATAATAAGAAGATGACGCAGCGTTGGAGGGTGAGAGAGAGGAGTTTAGGACGC  
TTAGCTCCGAAGGCTTGGGAACAAAGAGGTTCCATTCTAAGGAGAGACCAGAGAGAACG  
GAGTAACCGGTGATGTTGGCGAAGGCGATGGCTAAGGAACCTGCGGCCAGTTCGGTGTCT  
CCTAGGTGGCCGAGGAACAGCATGGAGACCATGGAACGCGCTAGAAAATGAGACCAGTG  
AGTGCTGTCGGGAATGCCAACTCCCACAGGGATTCGCTTCTCCTATCACATCCCACATT  
ATTGTCGAACGTCTTGTTAACACACCACCTAATTCTTCGGTCTGCTTTTCCTTATCATCA  
TGCCTCTGCTCTGATTTTGATTTCGCACATGTTCTTGGTTCTTCTATTTTATGACGACGAC  
TACTACTACTACTACTACACGTCTTCCTTCGTTGTTATGAAATGAAGACTCAAAAGAGGG  
TATATATGTACGTGTTTATGAATGATTTTGAATAATATGATGAAGGAAGAGTGCGTGTTG  
TGAAAACCTGCGATACACATACTAGACAGTGTTCTGAAACAAAGAGGAGGAGGAGGA  
GGAGGAGGAGAGGGGACTCTGTTTTTTTTTAAAGGGTGGAAGCGGTGGGAGCTAGGAGC  
AGAGTGATAAATGAAGAAAGAACTAATTACTGCGTGGGAGTGAAGAAGTGAGAAGGATG  
GGCGAGTATAAATAGAATTGAGGAGGATTTGAATTGAGCGTGTTTTCTGTTTAAAT  
ACTATGTGTAAGTGACCCTTCTTCCTT

>**Gsoja\_MSTRG.28712.1** GeneID=Gsoja\_MSTRG.28712;Strand=-;Pos=Chr07:9566342-9566887,  
CAGACCATGAGTGCTGAAGGAAAAGCAAGACTGAGAAATTGAGGAATGTTCTGCAAGGAT  
TCCCTTGAGAAACCAGTCCAAGTGCTTTTGCAGGAAGAGGAGAACCTGATGTAAAGTGCT  
AGTAGCACCGTGTTAAGCCAATTTGAAATGCAAAATGCAATGGCAGCTCCTTTGATGCCA  
AGCCCAAATTTTAGAACCAAAAGCCAACAGAGAAGGGCATGTGCTAAGGTAGTGAATCCA  
GAAGCTAGCATCATTGGAAGGACAATGTTCTGGGTTTGTAGGAACCTAGTAATGCACCGA  
AGAAGAGCGTTGGCTGAAAGGCTTGGGATCAAGTATGTGGCATATAGTTGAGCTTGTGCT  
GCAATTGTTTTGTCTTGATGCAGAACCAACCAGAATAGGCCTCAAGTATGCCCAAATAAAA  
GACATTGGTATAGTAGCAAGCATGATGATCACTATGGCTCTCTGCATGTGTATGCCAAC  
ATATGATACTGCTGTGCTCCATATGATTGACCACAAAATGTGTCAAGTGCACTTGACATA  
CCTAGC

>**Gsoja\_MSTRG.65595.1** GeneID=Gsoja\_MSTRG.65595;Strand=-;Pos=Chr15:2789754-2790594,

GTTTCAGCCTTTCAAGTTAGAACTTGCATTTTTTCAGAAAGATATGTCCTACAGAAAGGCTA  
TAACATGATATATGCATATCATACCTGGCATCCTTAAAGAAAGTGCAAATTGGTATTCTC  
CTCCAATCACCTAATGAATACATACTCTCTTTCTCAGCCATATTTGAGAAGCCAAATTCA  
CTGTGTTGTTTGAGAAACCAAACGAGCAAAGGCAACTTATTGAGGCTAGTGATACATAAC  
TGAAGAGATACTGAAGGAGCTCCAATATTTGGCATGCGTTAAACTTTTAACTTGAGCATT  
AACAGTTAAAGACATCATAATAATTCGGCCCCAAAGTAGAGAGACTGCATAATACTATC  
TCGGTATTTATGTGGTTAAACACAGACCAACCAATCAAGTCAAATCATAATGGAATAACA  
TCATGGAATAGGGATAGACTCCACAGTGATGAAAAAGTTGGTAAAGGAGATGCCCTTTAA  
TATTCTTCCCCTCTTGCATAGAATAGTCCTTCTCACTATGTATGAGCAAACCACTAACT  
ATAATAATAAAGAATGAAAAAAGTACTTGATTAAACACACACAAAGAGGGTTTACCCCCA  
TGAGAAAACACTGTAAAGTGAGTTCCCCTTAATTCAAACCTGGACATTTGGGATTTGAAA  
GAGAGTCAAACCAACCCATCACAAGTAAGACAAATAAACTGCAATTCAGGCTTTGAAACT  
CCACAGTCAGGCTTTAATACTAGCTTTGAAATAAAACACCCTTAACTTGGGGGCGAAAAA  
CAACCATAGCATGATAATGGAACCTCTGAGAACAGAACAAGAGACGTTTGAGTTGAGGTAG  
G

>**Gsoja\_MSTRG.52475.2** GeneID=Gsoja\_MSTRG.52475;Strand=-;Pos=Chr11:45317721-  
45317734,45344717-45344844,45344941-45345072,45345247-45345336,45345511-45345652,

TGAGAAATAGGAGAAGGAGTGTTTGAGGGAGTTGGGACATAAGGTTGGTTGCCAGGGGGA  
GGTGTTTTTGAGTAGTAGTGGAACATTTGGAGGACTATAAATTGGAGAAGGTGTCTTT  
GGTGGTGTTGAAACATAGGGAGGTTGGTTATGAGGGGAAGGAGCATTTGGAGGACTATAA  
GCAGGAGATGGTGTTTTTGAGGAGTAGGAACATTTGGTGGAGTGTAATAGGTGAAGGT  
GTTTTGGGAGGAGTGGAACATTAGGAGGATTATAAGAAGGAGAAGGTGTTTTGGAGGT  
GTAGGAACATAGGGAGGTTGGTTATGAGGGGAAGGAGCATTTGGAGGACTATAAGCAGGA  
GATGGTGTTTTTGAGGTGTAGGAACATAGGGTGGATTGTTACTAGGGGAAGGAGCTTTT  
GGGGGAGTGACACAGGAGAGGGTATTTTTGGAGGCGTTGGAAAATTAGGAGGAGTATAA  
ACTGGGGAAGGAGTTCTTGAGGTGT

>**Gsoja\_MSTRG.52478.1** GeneID=Gsoja\_MSTRG.52478;Strand=-;Pos=Chr11:45322732-45323210,

CGAGAAAATAATCTATCATCAATCATATGGTTCTCCATTGTCAATTACACGTAGTTTCCT  
AGTTTTTTTATAGTATTCTTTTACGGTGGGATACATTACTCCCCATCTATTCTTGATGT

GTTCCCGTGAGACTGTTACATTATATGCCAAGATTTACTCTCTGCAACTCACCAACACTC  
CCAAATAAAATATAAAAAAAGTGTGAGCACTTTCTCAAATGAATATAAGCAAGAAACG  
CTTACCAAAATCATGTTCAAGTGTTCACCTATCTGATAAACTTCTGCATAATAGAATGC  
AAACCTTTTTCTTTTTTTTTTACCATAAGTCCAATTCCATTCAAGTAAACAACAAGAGGC  
CGTTCTTTATCATTGTCCCTAGAGAGATCCAATTTAGTCCATTTGGCACGCCTTATGAAA  
AGGAAGAGAGTCCCACTTTGACAAAGTAACCCACAAATCAGACCAATCCATAAACCTTA  
>Gsoja\_MSTRG.5532.1 GenelD=Gsoja\_MSTRG.5532;Strand=+;Pos=Chr02:7841861-7842099,  
GGAGAGAATAATTAACCTGAAAGAACTCCTTGTAAGCTGTCAGTAAAAATAGAGAGACAG  
AGCAGAGGGATCATAACAGCCACATAATGAACAACCATACGGTCATCACTATAGGCATAA  
CCCAAGATATGTCTGCAGCCGAATAGTGTGCACTTACAATGAAACCCTCTGTGACTGCA  
AGGAACATCGTTGCAGAAACAGCCACATGAACTGCTTGTGGATTCCCAGCTCCTAATTC  
>Gsoja\_MSTRG.52477.1 GenelD=Gsoja\_MSTRG.52477;Strand=-;Pos=Chr11:45320962-45321906,  
TAGAATTTAGAACCTTACCATATTGCAATCAACGAAGTGGTTATCTGTGAGTCGGGCATT  
AGTCCAGCTAAGAAAACCAAACTTCAAAGCCCAATACTCCAACTTGCATAACATAAA  
CATCAGGTAATAAGATGATATATGAATCTGGACGAACCATGGTTTTTACCCTTGTATTGA  
GGTGTTTTTCACTTTAAACAAATCGTGTCTCTGATTTTTCTTAATTTCTATTTGCGCTC  
TATAATTTATTGGTGCTCCTAGGTTTTTGCAAATTTGGGAGAATTTATTTTCACTGTCTA  
TTACTCTATTATTGAGTTTGTTATTGTGTTGGCTTGTTTTTCCAATCAAGATGAACAATC  
AAAAGGGCTAGCTAAGTGAAAGGTTATTAGTAATTCATACCATACCATTGCAGCAGAGGG  
CAGAGCTAGTCTCATGTTTGTAATACGTAACGAAATGAATGCGTTGAAAATCCTTTCCA  
TGTCTGCTTGAACCTTCTAGCATAATTACATACAAGGCCAATAATAGCAATGATATCCA  
TAGTGAAATAGAAGCAGCAACTGGTGCACCTGTAAACTCAGACCTGACCACTGAACCAA  
GCCATATGCAACACCAATATGAACCAGCATTGGAAGAGCAGAGAGTACAACCAATGGAAT  
TACTACAGATTGTGTCTGGAGAACTCAAGATGTTTTGCAAGAAGCTATAAGCAAACAC  
TCCCGGGATAAGAACTTCATATAAAGTGCAGCTGTTCTTGCAATGTCGGGAGATTGATG  
AAGCAACACTAGGATGGGTTCTGTATAGAACCAAATAATGGATATAATGATTGAAAAAAT  
AAGAGATATGATGCAAGAGGCTTGTAGGTAAATCCCAGCATTTGGTATTCCTTTGCACC  
AAATCCTTGTCCGCAGAGTGTTCCAGTGCCCCACTCAAACCAAC

>**Gsoja\_MSTRG.61707.50** GenelD=Gsoja\_MSTRG.61707;Strand=+;Pos=Chr14:2477086-  
2477438,2477511-2477911,

GAAAATGATTGGACAAGAACACCTAAATTTGTTTCATTAATTATTATTTGCAACATCAAA  
TGTTTGTTTCACATATATTAGACAAGTTTTTTTTTTTGAATAAAGCAACTTCAAAGCACC  
CATCATTTTTATTATACTATTTCTTCCTTGCCTTAATCATGAGCTTAATAAAGTTTTCA  
TCCTGAAGTTGTAATTGGTGCTCTTGGTGGCCCTGAAATTGTAATCGGTGCCCTTGGCGA  
CCCTGCCTTTGGTGGCCCCGAAGTTGTAATCGGTGCCCTTGGTGGCCCTGCCTTTGGTGG  
TCCCGAAGTTGTAATTGGTGCTCTTGGTTGCCCTGCCTTTGGTGGTCCTGAAGTTGTAAT  
CGGTACCCCTTGGGGGCCCTTCCTTTGGTGGTCCCGAAGTTGAAATTGGTGCTCTTGGTAG  
CCCTGCCTTTGGTGGTCTGAAGTTGTAAGTGGTGGCTCTGGTTCTGAAGCTGTAAGTAG  
TGCCCTTGGTGACCCTGCCTTTGGTGGCCCCAAAGTTGTAATAAGTACCCTTGGGGGCC  
TTCTTTGGTGGCCCCGAAGTTGAAATTGGTGCTCTTGGTGGCCCTGCCTTTGGTGGTCC  
TGAAGGTGTAAGTGGTGGCTCTGGTTCTGAAGCTGTAAGTGTGAGAACAAATACAAGTAG  
TAGATGAAAAATTGCAACAAACACTTTCTTCATTTTGAAAACGAATTTCTATCTCAATA  
AACTTTTAGGATACACTTGTATTTTGATGGGAA

>**Gsoja\_MSTRG.14969.1** GeneID=Gsoja\_MSTRG.14969;Strand=-;Pos=Chr04:7659745-7660042,

AGACGGAGACGCAGTTAGGAACAGCTAGTGCGAGAAGGGAAGACCATCCCCTGAGGCAGT  
CGGTGCTAGGGGGAACCCACGAGTCCTTGTAGACACGAGAGAAGTAAACAAAGGAAGAAA  
GGAAGATGAAGAGGTTTAGGTTGGTCCACACCATGGCTATTGCAACGCCAGACACTCCCA  
TTTTAAAGTGGACAACTAATAGGAAGTTGAGAGGGACGTGGAGGAGGACGGAGATTGCGG  
AGCAGTAGGTGAGGGGTAACGTGATGCTTTGTGTTTCGGAGGTAGATTCTCAGAGGGTG

>**Gsoja\_MSTRG.26694.1** GeneID=Gsoja\_MSTRG.26694;Strand=+;Pos=Chr06:46819304-46819564,

GAGCCAACTCAGGGTGAGGAAGCAATCCTGCAAGCAGAACCAAAATTTGGAAGTACCACG  
TTTCTAAGCACAGCATCACCGCTGAAGCTGCAGACAACCTAAAAAACTCTGCTAACCCCG  
AAAATGCTTGAAAAGTGAACCCTCTCCACGTGTGCTTACACCTCTCACTCTTCACAATGT  
ACACAAACTGCGCAATCACAATGATCCACCACGAAACACTCAACACCAAAGATGCACCCA  
ACAGACCAAGCCCCACCTTAT

>**Gsoja\_MSTRG.417.2** GeneID=Gsoja\_MSTRG.417;Strand=-;Pos=Chr01:2612174-2612427,2612458-  
2612933,2696306-2696317,

AGAAGAAGAAGAAAGAAGAAAACACATAAAACCCGAAGAAGAAGAAGAAAAAAGAAA  
CCGCTACTCAACATGACCAGAGGATGAAATAAATCAAATAGATCCCGTCCGTCCGTGTGC



GGAAAAGAAAGATCAAGGGCGGAAATGCCACCACGTGGGACGAATCAAAGACAATTGTTCTCATGAAAGATCTTAAGCCACCAAGGCCATGGCTACGAAGGTTCCAGCGAGTGCAGAGGTAGCAATGAAGGCCTTGCTGACGGAGAATGCAGCGGAGGGCGGTGGAGGCTCGGCGCCACCGGAGGGTCCGGGTGAGGGTCCGGGTGGAGTGTTAGGAGAGGTGGGGCTTGGTGCTACTGTAGGAGAAGGTGAAGGAGGAGAGGCTGCAGGAGAGGAAGCAGGTGTAGGTGCAGCCGTTGGTGGTGCTGGTGCTGGTGTTGGTGTTGCTGCTGGTGGTGGAGTTGCTGCTGGTGGTGGGGTTGCTGGTGTTGGTGGGTGCTGGTGCAAGGTGCTGATCTGGGTGGTGGTGGTGGTGGGGTTGTAGTGGGTGGTTGTGACGGTGCAGCACCTGGGGCTTGGGCTAAGCATGAGCTAGCCAAGAGCCCCAAGATCAGAAACAGTTGCACAGCACCAGAACCCATATCTAGAGAGAAAGTAGTAGTAGTAGTGCTTGGGTGTGTAAGAGAGAGATAAGAGAGTTTGAGCAGTGGAAAGATGATAAGAGAACAGAATATATAAAAAGAG

>**Gsoja\_MSTRG.57914.1** GeneID=Gsoja\_MSTRG.57914;Strand=+;Pos=Chr12:44102584-44103337,

AGAAATAGAAGAAGGAGATGGGTCCATACGATATGTATGATATTATATTGTAACAAGACGACAGATAAAGAAAAATGAAAAATGTCAATCAAGTATATATAGTGTGTAAGTACATGCA TGTCTCATTACTTGCTATGAAATGATTGTTGACAGGATATATACAAATACCTAAATGACC TATGAATGCTGTGTCTATGAGAGAAGCAATGGGATCAGCAGCAATAGCCAGTGCCGAGGG GAATGCAATCCCTAGTATCTCCCGAGAAAGAGCATCCAACCTTGAAACATTCCTACATTT ATTCACATTAGCAGAATCATATCACTCAAGAGCTTCATGTAAATCAATAATGTAACCAC ATATATGACAAGATAAGATCTTTTATAATTATTCTAGAAAGCATAATGTTCTCCTTCAAG AAAAATAGCATAATGTATATATGCGCTGAATATATACCTCGCATCTCTGAAGAAAACAAA GAGAGGCATCTTCCACTTGTTGTTGGGCTCGTTGGAACATCCATTCTCGTCCATTGGATT GTGAATCTCACACAAGAGATCTTCACTGAAGTGCTTGAAACAATTGATCAAAAGAAGAAA TTAAGATCGTTCACGATAATTAAGGTCAATCCTCAACTATGTACCTGCCAAGTTAATCAT AATTTGAGTTTGAGATCGTCCAATATTAATGTTTATATAATGTTACATTAATCAAAACT AAGAAGGAATGTATATATATATGATGGTCACGCC

>**Gsoja\_MSTRG.52475.13** GeneID=Gsoja\_MSTRG.52475;Strand=-;Pos=Chr11:45344107-45344832,45345007-45345162,45345511-45346449,

TTACAACTCACATTGGTAACCATAGATACACAGATTATACGACATAAAATTAATTATGAGACGCGATCTCATTTGTCCAAGTAAAAATATTAGAAAAAATATATAAAAGTGTTCACAATT

ACTATATACTATAACTCAAGTTCCAAAGAAAGTTTGATTTTTCTAATCAATAGTGGTACT  
TAGAGCAGCACCGACCAGAACTATAACTCAAGTTCCAAAAAAGTTTGATTTTTCTAAC  
CAAGAGTGGTGCTTAGAGCAGCACCGACCAGAATGGTTAGTGAATACACTCCAAACCGCG  
ACGGCGTTATAGACGACGCACCGTTTAGTCTGGCTGGCGTCGTTTCGTCGACGACGACG  
GCGTTTGAGATGATCCCGACGACGACGACGGCGAGGGGGTTGTTGCCGCCGCAGACGGTA  
ATGGCGGCGATGTTGCCGGGGTGAGGGAGGAAGAGGGTGGGTAAGTGGGTGGTGCAGTTG  
AAGCAGAAGGTGGGTAAGATGGAGAGAGTGAAGTTGAGGGAGGGATGGTGGATGGATAGG  
GCGATGATGGGTAGGGTGGTTGAGATGTTGGGGAAGGAGTGTTGGAGGTGTTGGATTAA  
TGTAAGGTGGTTGAGATGTTGGGGAATGAGAGTTTGAGGTGCTGCAATGGAAGGAGGT  
GGGAAGTGGGTGAAGGAGTGGTGTGTTGGAGGTGTGGGAATGTAAGGTGGTTGAGATGTTG  
GAGATGGGGTTATTGGAACAAAGGGTGGTTGATGGGCAGGGGAAGGCGTTTTTGGAGGGG  
TTGGAGTGTAGGGAGGTTGAGAAATAGGAGAAGGAGTGTTTGAGGGAGTTGGGACATAAG  
GTTGGTTGCCAGGGGGAGGTGTTTTTGGAGTAGTAGTGGGAACATTTGGAGGACTATAAA  
TTGGAGAAGGTGTCTTTGGTGGTGTGAAACATAGGGAGGTTGGTTATGAGGGGAAGGAG  
CATTTGGAGGACTATAAGCAGGAGATGGTGTGTTTTTGGAGGAGTAGGAACATTTGGTGGAG  
TGTAATAGGTGAAGGTGTTTTGGGAGGAGTGGAACATTAGGAGGATTATAAGAAGGAG  
AAGGTGTTTTTGGAGGTGTAGGAACATAGGGTGGATTGTTACTAGGGGAAGGAGCTTTTTG  
GGGAGTGTACACAGGAGAGGGTATTTTTGGAGGCGTTGGAAAATTAGGAGGAGTATAAA  
CTGGGGAAGGAGTTTGTGGAGGAGTTGGAATATATGGAGGATGATTAGCAGGTGAAGGTG  
CTTGAGTGGGAACATTGGGAGGAGTGATACAGGGGAAGGAGTTTTTGGAGGTGTTGGAA  
CATTAGGTGGATAATGAATAGGTGAAGGTGGTTTTTGGATGAACATAGGGAGGGCTGGAAA  
TAGGTGAAGGTGTTTTAGGAGGAGGTATTGGAACATAGGGTGGATGATAAGGAGTTTCTG  
GAGGAGTTGGAACAGTTGGAGTTTGAGGAGGTGCTGGAACATAAGGTGCTCTCGGAGGAG  
TAATTGGAACATAAGGAGTGTTTGGAGGGGTGGAACATAAGGTGGATTTGGATGATAAG  
GTGCTTTTGGAGGAGTAATTGGAACGTAAGGAGTGTTTGGAGGTGTCGGAGAATAATAAG  
GAGGTGGCTCTCTCACAGCCAACACCACAATAATCAATTTCTGACCCTTCTACAATTAT  
CATCTTTCCACTAATGAAGTAAAATGGACCCGATCTATCAAACCTGAAACTCCGAGTCAC  
CATCCTCAAACCTTCTTGATCGGGTCTTCTTGTTACATTTCTCATAATCATCATTGTTCA  
CCACCAACACAGTATCTGAGT

>**Gsoja\_MSTRG.52475.6** GeneID=Gsoja\_MSTRG.52475;Strand=-;Pos=Chr11:45344091-45344616,45344833-45344844,45344941-45345072,45345247-45345336,45345511-45345654,45345841-45345843,45345895-45346448,

TACAACTCACATTGGTAACCATAGATACACAGATTATACGACATAAAATTAATTATGAGA  
CGCGATCTCATTTGTCCAAGTAAAAATATTAGAAAAAATATATAAAAGTGTTCACAATTA  
CTATATACTATAACTCAAGTTCCAAAGAAAGTTTGATTTTTCTAATCAATAGTGGTACTT  
AGAGCAGCACCGACCAGAACTATAACTCAAGTTCAAAAAAAAGTTTGATTTTTCTAACC  
AAGAGTGGTGCTTAGAGCAGCACCGACCAGAATGGTTAGTGAATACACTCCAAACCGCGA  
CGGCGTTATAGACGACGCACCGTTTAGTCTGGCTGGCGTCGTTTCGTTGACGACGACGG  
CGTTTGAGATGATCCCGACGACGACGACGGCGAGGGGTTGTTGCCGCCGACGACGGTAA  
TGCGCGCGATGTTGCCGGGGTGAGGGAGGAAGAGGGTGGGTAAGTGGGTGGTGCAATTGA  
AGCAGAAGGTGGGTAAGATGGAGAGAGTGAGGTTGAGGGAGGGATGGTGGATGGATAGGG  
CGATGATGGGTAGGGTGGTTGAGAAATAGGAGAAGGAGTGTTTGAGGGAGTTGGGACATA  
AGGTTGGTTGCCAGGGGGAGGTGTTTTTGGAGTAGTAGTGGGAACATTTGGAGGACTATA  
AATTGGAGAAGGTGTCTTTGGTGGTGTGAAACATAGGGAGGTTGGTTATGAGGGGAAGG  
AGCATTTGGAGGACTATAAGCAGGAGATGGTGTTTTTGGAGGAGTAGGAACATTTGGTGG  
AGTGTAATAGGTGAAGGTGTTTTGGGAGGAGTGGGAACATTAGGAGGATTATAAGAAGG  
AGAAGGTGTTTTTGGAGGTGTAGGAACATAGGGAGGTTGGTTATGAGGGGAAGGAGCATT  
TGGAGGACTATAAGCAGGAGATGGTGTTTTTGGAGGTGTTGGAACATTAGGTGGATAATG  
AATAGGTGAAGGTGGTTTTTGGATGAACATAGGGAGGGCTGGAAATAGGTGAAGGTGTTTT  
AGGAGGAGGTATTGGAACATAGGGTGGATGATAAGGAGTTTCTGGAGGAGTTGGAACAGT  
TGGAGTTTGAGGAGGTGCTGGAACATAAGGTGCTCTCGGAGGAGTAATTGGAACATAAGG  
AGTGTTTGGAGGGGTTGGAACATAAGGTGGATTTGGATGATAAGGTGCTTTTGGAGGAGT  
AATTGGAACGTAAGGAGTGTTTGGAGGTGTCGGAGAATAATAAGGAGGTGGCTCTCTCAC  
AGCCAACACCACAATAATCAATTTCTGACCCTTCTACAATTATCATCTTTCCCACTAAT  
GAAGTAAATGGACCCGATCTATCAAACGAACTCCGAGTCACCATCCTCAAACCTCTT  
GATCGGGTTCTTCTTGTTACATTTCTCATAATCATCATTGTTACCACCAACACAGTATC  
TGAGTCCTTCTTGTAATAA

>**Gsoja\_MSTRG.437.1** GeneID=Gsoja\_MSTRG.437;Strand=+;Pos=Chr01:2762297-2762533,

CAAAAATGGTGTGAGGTCTTAAGTAGATCTTGCACTTCTGTGTCGTTTGAAAACAGGGA  
AGGGTACTCATTCCGCGAGATCATCAAAACAATAGCGAGTAAACTCCGATCAAAACCGA

AGTAATCACGGCAACCACTAGGGAAAATAATGCTGTTCTTGGGTGGCGTGCCCCTAGTTC  
ATTCGATATTCTCACACTGAAATTTTCATCCAACTTTACATAAAAAACAATAGTCT  
>Gsoja\_MSTRG.9430.1 GeneID=Gsoja\_MSTRG.9430;Strand=+;Pos=Chr03:492299-492519,  
CAGTGAATACAAGAGCATAGGCAGCGAGTTCTCTTGAACCAATATGACCAATAAAAGCTT  
GGCTTATAACATTGATGCCAAAGGTCGTAAACCTTGTGAATATGGCTGGTGCTGCCACTA  
TCCACATCTCTTTGCTCTCTTCCCACACCCTCTTCACCAATGATAAATTATCTTCTTCTG  
ACACTTCCTCTTTGCTCAGCAACTTCTTCTCTAGATTCCCC

>**Gsoja\_MSTRG.39207.1** GeneID=Gsoja\_MSTRG.39207;Strand=-;Pos=Chr09:18274102-18274358,  
ATTCATTTCCACATTCTCAGTCTCATTGTTCTCTTTGGATGCAACTTTCTCTATGTCTTG  
AAGGGAATGATCATCGAGCATTACTTGTCTTTGGACTTAGCCTTATCACTTAACTTCTT  
TTCTGTATTGATTTTTTCAATGGTATTTTCTCAGCTACGAAGGAAGTTGTGATGCTAAC  
CAAAGGGAAGATGGTAATCCTTGAAGCTTGGTTGAACAAAGCAATGGACACTCCTGCAGC  
AGCAAGCTCCACGGGCC

>**Gsoja\_MSTRG.52475.33** GeneID=Gsoja\_MSTRG.52475;Strand=-;Pos=Chr11:45344784-  
45344988,45345088-45345178,  
GTAGGAACATAGGGAGGTTGGTTATGAGGGGAAGGAGCATTTGGAGGACTATAAGCAGGA  
GATGGTGTTTTTGGAGGAGTAGGAACATTTGGTTGGTTATGAGGGGAAGGAGCATTTGGA  
GGACTATAAGCAGGAGATGGTGTTTTTGGAGGAGTAGGAACATTTGGTGGAGTGTAATA  
GGTGAAGGTGTTTTTGGGAGGAGTGGGAACATTAGGAGGATTATAAGAAGGAGAAGGTGTT  
TTTGGAGGTGTAGGAACATAGGGTGGATTGTTACTAGGGGAAGGAGCTTTTGGGGG

>Gsoja\_MSTRG.77249.1 GeneID=Gsoja\_MSTRG.77249;Strand=+;Pos=Chr17:40642095-40642385,  
ACCATGACTCCAAAGGCGAGGCCAGCAATAACAGAATTTTCAACAGAACTGCTGCAAGA  
TCAAGGTCACCAACAAGGCCAGCAAATGTTTGAGTGAGTGACCAAGTGAGTACTGACAT  
ATAGAGGTAACGATAGCAGGGCCAGCTATTTCCATAGCTTCTTCGACTCAAACCCAAAT  
CTCTTAACAACAGTGTTTCGGTGTCTTCTCCTCCTCAACATTAGAACAAGAGTTGTCAATG  
TTTTCTAGTAAGGGAGAATCCATTGGCTTGGTTAGTAGGTTACTTGCACT

>**Gsoja\_MSTRG.65598.1** GeneID=Gsoja\_MSTRG.65598;Strand=-;Pos=Chr15:2794482-2794793,  
GATTCTATATTTCAATTCATTTCACTATATATGAGACTATGAGAGTAGAGTTAGAGATT

TTCTGTACATACTTATGATGTAGAGGTAAATTTTTCAACCAATACCCCAAGCACAATCAA  
GCAGGGAAAAGTGCCTATTCTTTCTGAAGAATTTTTTAAGCAACTTAAAAACCTAGGGAA  
AGCTTCTCTTCACTTAAATGTAATCAGTAAACACCACTGAAAACTAGGCCTAATATGAAG  
CTATAACTACGGTGTCTGCCATGTGCAGTCATGAGCTCCTTAGGAACTCCCAAGGTCCTG  
ATCCCGTTCCAA

>**Gsoja\_MSTRG.52475.7** GeneID=Gsoja\_MSTRG.52475;Strand=-;Pos=Chr11:45344091-  
45344832,45345007-45345162,45345262-45346448,

TACAACTCACATTGGTAACCATAGATACACAGATTATACGACATAAAATTAATTATGAGA  
CGCGATCTCATTTGTCCAAGTAAAAATATTAGAAAAAATATATAAAAGTGTTCAACAATTA  
CTATATACTATAACTCAAGTTCAAAGAAAGTTTGATTTTTCTAATCAATAGTGGTACTT  
AGAGCAGCACCGACCAGAACTATAACTCAAGTTCAAAAAAAAGTTTGATTTTTCTAACC  
AAGAGTGGTGCTTAGAGCAGCACCGACCAGAATGGTTAGTGAATACACTCCAAACCGCGA  
CGGCGTTATAGACGACGCACCGTTTAGTCTGGCTGGCGTCGTTTCGTTGACGACGACGG  
CGTTTGAGATGATCCCGACGACGACGACGGCGAGGGGGTTGTTGCCGCCGACGACGGTAA  
TGGCGGCGATGTTGCCGGGGTGAGGGAGGAAGAGGGTGGGTAAGTGGGTGGTGCAATTGA  
AGCAGAAGGTGGGTAAGATGGAGAGAGTGAGGTTGAGGGAGGGATGGTGGATGGATAGGG  
CGATGATGGGTAGGGTGGTTGAGATGTTGGGGAAGGAGTGTTTGGAGGTGTTGGATTAAT  
GTAAGGTGGTTGAGATGTTGGGGAATGAGAGTTTGGAGGTGCTGCAATGGAAGGAGGTTG  
GGAAGTGGGTGAAGGAGTGGTGTTTGGAGGTGTGGGAATGTAAGGTGGTTGAGATGTTGG  
AGATGGGGTTATTGGAACAAAGGGTGGTTGATGGGCAGGGGAAGGCGTTTTTGGAGGGGT  
TGGAGTGTAGGGAGGTTGAGAAATAGGAGAAGGAGTGTTTGGAGGAGTTGGGACATAAGG  
TTGGTTGCCAGGGGGAGGTGTTTTTGGAGTAGTAGTGGGAACATTTGGAGGACTATAAAT  
TGGAGAAGGTGTCTTTGGTGGTGTTGAAACATAGGGAGGTTGGTTATGAGGGGAAGGAGC  
ATTTGGAGGACTATAAGCAGGAGATGGTGTTTTTGGAGGAGTAGGAACATTTGGTGGAGT  
GTAAATAGGTGAAGGTGTTTTGGGAGGAGTGGGAACATTAGGAGGATTATAAGAAGGAGA  
AGGTGTTTTTGGAGGTGTAGGAACATAGGGAGGTTGGTTATGAGGGGAAGGAGCATTGG  
AGGACTATAAGCAGGAGATGGTGTTTTTGGAGGAGTAGGAACATTTGGTTGGTTATGAGG  
GGAAGGAGCATTGAGGACTATAAGCAGGAGATGGTGTTTTTGGAGGAGTAGGAACATT  
TGGTGGAGTGTAATAGGTGAAGGTGTTTTGGGAGGAGTGGGAACATTAGGAGGATTATA  
AGAAGGAGAAGGTGTTTTTGGAGGTGTAGGAACATAGGGTGGATTGTTACTAGGGGAAGG

AGCTTTTGGGGGAGTGTACACAGGAGAGGGTATTTTGGAGGCGTTGGAAAATTAGGAGG  
AGTATAAACTGGGGAAGGAGTTTGTGGAGGAGTTGGAATATATGGAGGATGATTAGCAGG  
TGAAGGTGCTTGAGTGGGAACATTGGGAGGAGTGTATACAGGGGAAGGAGTTTTTGGAGG  
TGTTGGAACATTAGGTGGATAATGAATAGGTGAAGGTGGTTTTGGATGAACATAGGGAGG  
GCTGGAAATAGGTGAAGGTGTTTTAGGAGGAGGTATTGGAACATAGGGTGGATGATAAGG  
AGTTTCTGGAGGAGTTGGAACAGTTGGAGTTTGAGGAGGTGCTGGAACATAAGGTGCTCT  
CGGAGGAGTAATTGGAACATAAGGAGTGTTTGGAGGGGTTGGAACATAAGGTGGATTTGG  
ATGATAAGGTGCTTTTGGAGGAGTAATTGGAACGTAAGGAGTGTTTGGAGGTGTCGGAGA  
ATAATAAGGAGGTGGCTCTCTCACAGCCAACACCACAATAATCAATTTCTGACCCCTCTC  
ACAATTATCATCTTTCCCACTAATGAAGTAAAATGGACCCGATCTATCAAACCTGAACTC  
CGAGTCACCATCCTCAAACCTCTTGATCGGGTCTTCTTGTTACATTTCTCATAATCATC  
ATTGTTCAACCAACACAGTATCTGAGTCCTTCTTGACTTAAA

>**Gsoja\_MSTRG.57217.1** GeneID=Gsoja\_MSTRG.57217;Strand=-;Pos=Chr12:39971164-39971424,

ACTTCAAATTGCTGCTTAGACAACCTAGAATTAATCCTTGGCAGTTTTAATTTTAATTCC  
CTACCTCATAATGGAACAACGAAGTGTTAACTACCTGTTGAATCTCTAGAATTAGTCC  
TTATAAATTGGTTTCAATAAAAAATAATAAAAGAGAATATTATGTCTCTCTTGCTCTC  
CTACATAAACAAGTTATTCTTCAATTTAGTAGTGGTTCCTTCTTGTCCTCCCATTTGGTC  
AGCCTCTTGGCTGCTTCCTCT

>**Gsoja\_MSTRG.89036.1** GeneID=Gsoja\_MSTRG.89036;Strand=-;Pos=Chr20:42497574-42499349,

TGATAATAAAGAATCTTCCTTGATTTGAGCTTTGGTGGCTTCTCTGCACCAACCTCCTT  
GCTGTCATCAACAACAACACTGGTTAGTTTCTTGGCCCTAGAGCCTCAGCATCCCAATC  
CGTTCGACTCAGAACCACCAACATGGTCACTGCACAAGACCCCTGAGCCGCAAGTAACCC  
AAGCCACAACCCTTGAAAATCAAACCCTGCGAAAAAACCAAGCCAAACCGCCACAGGCAT  
TCCCACAAGATAGAAACAACCTAAGTTAATGTTGGCACCAACTTTAGGCCTTGCTGTGCC  
TCTCAGCACTCCACACCCCGTTGTTTGAGGACAGTTCCGAGTTCGAGAGTCCTATAAC  
CGGTAGCACAATGAGGTCAAAGTTATTATCTCCTTGCTTGTTGTGAACATGTTGGCCCA  
AATGTTCTAACCAGAATGGTGAAAACCAAGCGAAAACACCTAACATGAAGCTGCAAGA  
GAGGCCAACTATGGAAGAAAAATTTGCCTTCGAGGGCTTTTGC GCGCCTAATTTGTTGCC  
AACTCTTGTTGGACACGCTGAAGCTTATTGACGATGGGAAAATGTAGAGCAAGGAAGTTGT

TTGAATCAAAATCCCCATGGAGGCCACGGTTGCTCTAGGATTCACCAACAACCCGCATAA  
CAAAATCATGATCTCATACCACCACCATTCTAGGCACACGGAAATGCAGCTTGGGATAGC  
CAAATTGAGGAGCGATTTCCATTGTGTAAACACTCGAAAGAAAAGCCTCCCCATGTTTT  
CTTATGGGTGCCAGAGAAGACTATGTAGAGAATCAAAGAAGCTACGAGGTTGAGGTTAGT  
CCAAACCCCGCTGAGAGCCACGCCTTTGATTCCCCAATTGAGGTGGGAAACGAGAAGGTA  
GTTGATAGGAATATGGAGGAGAATTGAGAAAGTGGCACAAGAGTGAGAGGCAGAGTAAT  
GGATTGGCTTCGAAGGTAAATTCTTAAAGGGTGTAAGAAAGATTGTGCTAAGAGGTCAGG  
GATGGAATAAAGAAGATATGATTGGGCTTGTGTGGCGATAGCCTCGTCTTGGCCACATAA  
TAGAAGGATATGCTTCATGTAGAGCCAAAGGAGAGAGATTGGGATACAAGTGAAGAGGAG  
CAAGAGAATGGTTCTTTGTAAGCAGAGGCCGAGGAGGGAGAACTTTTTGGCACCGTAGGC  
TTGTCCGCAAATGGATTCCATTCCGACGGCGAGGCCGGAGAGGATAGAGTAGCCGCTGAT  
GTTGGCGAAGCCCACGGCGAGTGAGCCGCCGGCTAAGGCCAGCTCGCCGAGGCGGCCAG  
GAAGAGCATGGAGATCATGGAACGGCAGTAGAGCAAGAGACCGGTGAGGATCATGGGGAA  
GGCTATCTTGCATATTGAAATGAGTTCTTTCAAGACATGATGATGGGTTTGCATTGTTCT  
TGGGTCGTTTTTTTCTTCATGGAGTGTTGTTAGTGTTACTGTTATGTCCTTTTGGATCAA  
GGGGTTGGTGATCATCATGTCTGCCTCTGGGGGTTTCATTGAAACTACATACTCCGGGTT  
TGAGTTGCATTTGCAGGGGAGGTGGGAAGTTATATGACACATATTTTCTGCTTTTGTGT  
GTGTGTGTGTCAAGAAAAGAGTGTTTATAGAGAACACGTGAAAGTTGAACCGAGAAAAGAAA  
GAGAGAGATAGAGAGGATTATAGGGTGAACGGGAGGGGGTTGAGCACAGGCTTGTCTTGG  
GGCTTTTATAGGAGATTTTGGGTGGGAATATGGGCG

>**Gsoja\_MSTRG.52475.18** GeneID=Gsoja\_MSTRG.52475;Strand=-;Pos=Chr11:45344491-  
45344646,45344989-45345006,45345181-45345336,45345511-45345654,45345841-  
45345843,45345895-45345986,

AGTGGGTGGTGCAGTTGAAGCAGAAGGTGGGTAAGATGGAGAGAGTGAGGTTGAGGGAGG  
GATGGTGGATGGATAGGGCGATGATGGGTAGGGTGGTTGAGAAATAGGAGAAGGAGTGTT  
TGAGGGAGTTGGGACATAAGGTTGGTTGCCAGGGGAGGTGTTTTTGGAGTAGTAGTGGG  
AACATTTGGAGGACTATAAATTGGAGAAGGTGTCTTTGGTGGTGTGAAACATAGGGAGG  
TTGGTTATGAGGGGAAGGAGCATTTGGAGGACTATAAGCAGGAGATGGTGTTTTTGGAGG  
AGTAGGAACATTTGGTGGAGTGTAATAGGTGAAGGTGTTTTGGGAGGAGTGGGAACATT  
AGGAGGACTATAAATTGGAGAAGGTGTCTTTGGTGGTGTAGGAACATAGGGAGGAGTGTA  
TACAGGGGAAGGAGTTTTTGGAGGTGTTGGAACATTAGGTGGATAATGAATAGGTGAAGG

TGGTTTTGGATGAACATAGGGAGGGCTGGAAATAGGTGAAGGTGTTTTAGGAGGAGGTAT  
TGGAACATAGGGTGGATGATAAGGAGTTT

>**Gsoja\_MSTRG.52475.23** GenelD=Gsoja\_MSTRG.52475;Strand=-;Pos=Chr11:45344733-45344898,45345247-45345354,45345529-45345672,45345862-45345960,

GTGGGTAAGATGGAGAGAGTGAGGTTGAGGGAGGGATGGTGGATGGATAGGGCGATGATG  
GGTAGGGTGGTTGAGATGTTGGGGAAGGAGTGTTGGAGGGGTTGGAGTGTAGGGAGGTT  
GAGAAATAGGAGAAGGAGTGTTTGAGGGAGTTGGGACATAAGGTTGGTTGCCAGGGGGAG  
GTGTTTTTGGAGTAGTAGTGGGAACATTTGGAGGACTATAAATTGGAGAAGGTGTCTTTG  
GTGGTGTAGGAACATAGGGAGGTTGGTTATGAGGGGAAGGAGCATTTGGAGGACTATAAG  
CAGGAGATGGTGTTTTTGGAGGAGTAGGAACATTTGGTGGAGTGTAATAGGTGAAGGTG  
TTTTGGGAGGAGTGGGAACATTAGGAGGATTATAAGAAGGAGAAGGTGTTTTTGGAGGTG  
TAGGAACATAGGGTGGATTGTTACTAGGGGAAGGAGCTTTTGGGGGAGTGACACAGGAG  
AGGGTATTTTTGGAGGCGTTGGAAAATTAGGAGGAGT

>**Gsoja\_MSTRG.46556.1** GenelD=Gsoja\_MSTRG.46556;Strand=+;Pos=Chr10:50641045-50641577,50726117-50726126,

TACGGTAATAGGGGAGCCAGTGTTGAGAACGCGCCAGCCTCTAACGACACCTTCGGTGGC  
ATCCATAGCAATGGTTCGGACAACGCCTTCACCCAAATGCTGCGCCACCTCCAACACAAG  
CCTCGACGAGTGATCCAGAACCTCCAGCGCGGTCATGATCGGAGGCCAAACCCTCGTCGAA  
TCTGACATCGACGACGGCACCAATGACCTGGCAGACCTGCCCATCGCGCCCTTCCCGGT  
GAATTCATCGGTGATCTTCCCGCCGCCGCCGAGCTCCTTCTTCCCGGAGGAGGAGGAGA  
GGGAGGAGCGGTAGCAGCAGCCGCGCGGTGGCGTACTCGGCGACGCGGTTCAAGCAAGTA  
TCCGTGCGGTGAGGCACGGTTGGATGACGTGAGCCTCGATGTCGATGCGGAAATTGAGGG  
CTTCGATTGAGATCTACGAAGGGAGGATCGAATCAGAGAAGATACGAGCCTGCGTGAAGC  
CATCTTCAGAGAGAGAGAGAGAGAGAGAGAGAAAGAAAGAAGAGGGCTAGGGTTTTCATGGA  
TGA

>**Gsoja\_MSTRG.52476.1** GenelD=Gsoja\_MSTRG.52476;Strand=-;Pos=Chr11:45319666-45320071,

CAAAAGATAGAGGAATTTACCATAACTGCCACGCCAGTGACACTGAACCATGAATTTGCA  
AGAGTAGCACCAGCAAGCTGAAGCTACCAAGGTGACCAACAAGCATGACAGAAACCAAA  
ATGATCAAGTGATAGAACAAGTTGGTAAGAATCATTGGCAGTGAAAACAAGAGTTGGTG



TTGGCCTCTTCATGTCCAACACTTTGTTCCACCATCCCTCAGCTTGGGGGGATCTTGTG  
TTTTGATCTCTCCATTATTATCAGATGCTCTCAATAGGGGTACTCCTGTTCTTCTGAA  
CTAGAACTTGCCACCATCTTCTCTATCTCCTCTTTTATCTGCTCCACGTTTTCCATATAT  
ATGTGTAAGGAAGCACTTTGAATTTTTGGTGATATTAATATAAGCC

>**Gsoja\_MSTRG.84379.1** GenelD=Gsoja\_MSTRG.84379;Strand=-;Pos=Chr19:37666702-  
37666711,37713437-37715223,

TATTATTGGCTACATTATGTGGTAGAGTTATGTGTATACCTCTATTGCGTTTGCAGTAGC  
ATGTCCAAGATCATTATGACAGTGCATAGAAATAATAACATTTTCTGCTCCAGGGACATT  
GGCTTTTATATCAGCAATCAATTGTCTAATCTCGAATGGCATTGTTATGCCACAGTGTC  
ACCTATGCCCAAAGTTGTTGCCCCAGCTTTGATAACTTCTTCCAAAATTTGATAAAGAAA  
CTCTCTATCCGATCTGGTCTCATAATGGTTGAATAATGTAATAAGAAGAACTCAAATTC  
ATGACTATATATATCAACATTTGACACCAACAAAAATGTATATAATATTCACTTCATACA  
AAATTACACTATTTACACTTATTTATTTAATACTACTTAATTTTTACTTTTAAATATAG  
GGTAGTTTGCTTATTCTTATTTTTTTCAAGTAAGCATTTTTTTAAATAAAATAAAAATT  
TTATTTTTTTTCTAATATGTTTGTTTAACTATTTACTTGAAATAAGTAATTCTATCTAT  
TTATTAATAAAATTAATAATCACCTATTTTAAATTAATTTTTTAAGTTTAAACAAAATC  
ACCCATAAATCATAAATACTTCATTTGTCTCTAATTATAAGACTCTTTTAATTAATTCAC  
ACCCCTTAATAATTAATTTAATTAATCACATTAAATTTATCAATTATTTATATTATCAT  
TTTAAATTAATTCTTTTATTATCACTCTATCCATTTAATTATTTCTCATTAAATTTAGA  
GAGAAAATAATTAAATATATAAAAGAAAAATAATTAATACATCTATAAATCAAAAAAA  
TATCTTATTAATAAAATAAACAAATTTTTAAAAATAGTCTTATAATCAGGAAAAAAGTA  
TAAGCTAAAAGCTATTTTAAATAATGTAGGAAAAAATGCATTATGAATCTTATTCTAAGT  
GATAACTAATGCTACAAAACAAAACAAACAACTTAGTGTATGTTTGCGAATGCGATCCAA  
TCGTGTTGAACGGAAAAAATAGACTTTCTGAGGCAAAATTTCCAAAAGCAACACCCATGT  
TGCTTTCCCGTTGCATTGAAGCCAACGGAAATACAAACACAGCCTTAACCTCTGGAAAGA  
TGAGGCAGAAACGTGGGTGTGCAACGTAGAATGAGCACAACTAATAATTTGTCCGATAT  
GATTGAGTTAACGCCTACCCTTGTCGTGTTTTTTCTTTATGATCACAGTAGTCTCGTCCA  
AGCACTTTGGCCAAACGATAAAAAGAATATGGACAAGCGCAGTGGCATCGTGATTCTGTTT  
TTTTTTTCAGTAAGAAGGTGAGCGTGCATTACTAGGTGTTGGCTTAACTGGTGTACGCAG  
GTGGTAGCATTGTGTTGGTGCAGTGTTTGGTGAACCTTTGTGAACTACTGTGAGTGAGCAA

GGAAAATGCCAAACGAGAGGGTGTGTGTACCCGCGAGTTCAGGGACCTAAGAAGAGGGGC  
AAAGGGTGAGTTTTATCAGTGTGTTTGCTTTGGGTTGGTGATTTCAAAATTATATATAGT  
GAGTTTAATTACCACAAAAGCCACAATTTTTGTTGCCTTTAATTTAAAAATAATGTTGAG  
CTTAAGTTTCCGCCAATCCAAACACAGTGAAAATTAAGAACAATGTTACATCTTACTTTA  
GGGTGGATTGAAATAACTTGAATTCAATACTCTGCATCTGTAGAGAGGAGAGGTGAGGAG  
AGAGAATTTAAAATTGAAATAAAAGAGAGATGGAAAAAAGGAAAATATGCATCTTA

>**Gsoja\_MSTRG.5327.1** GeneID=Gsoja\_MSTRG.5327;Strand=+;Pos=Chr02:6508568-6509264,

ATCATAAAGCAACCACTCACAAGCCTCCAACCCATTGATCCTACCCACCAAACAAAATC  
CCAATGTCATAAATCATAATTGGTGTCAATTCATTTCTCTAGTGTGGTGTCTTTTTCTT  
AGCAAATGTCATCTTTGTTGTTCCCATTTCCATTCACCAACAACCCTTTTCTTTCTTCAT  
CTCTCTCATTTTCCTTATTCCTAAGCCCATTGCAACTACCCATTTCAATCCTTGTGAGCT  
TCTCAGCCTTCAAAGCCTCAGCTTCCCAATCTGTCTCACCAACACAACATAGAGGATTG  
ACACAGCACATGCAACCTGGGCCGACAGAAGCCCAAACCAAAGCCCCTGAACCCAACCT  
TGAACCAAAATGCCAGGCCCACTGCCACCGGGGTGCCACAAAGTAGAAAGAGCCCAGGT  
TTATGTGAGCCCCAATACCAGGCCGGGCCATGCCACGAAGGATCCCACAGCCCGTGGTTT  
GTGGGCAGTTTCCAAGCTCACACAAGCCCATAATTGGCATAACTGATGCAACCAACGCTT  
TGACGGGCTCATCATTGGTGAAAAGCCCAGCCCATCTTTGACCCAGAATCACAGTCCATG  
TCACATTGATGAAGCCTATCACAAAAGCGCATCCTAAGGCAACCACTGCTGCTAGCTTTG  
CCTTGTATGGTTTTCCAGCTCCAAGCTCATTCCCTAC

>**Gsoja\_MSTRG.77238.1** GeneID=Gsoja\_MSTRG.77238;Strand=+;Pos=Chr17:40586745-  
40586952,40635551-40635867,40636051-40636135,

CAGCAATACTGTTTGTGGATAAGTATGCAAGAACCAATGCCAAGTACCCCTCAGCAACAC  
ATGTTAGCCTTTAGAAGAGCGGGGTCACATGAAAAGGAAAATGTTAGATGTTGTCTATT  
TGGATGACTTGATATGGACCATTGAAATACAAGAAATGAGTGTGTCTTCACAAATAAG  
TAGGTTACATGACAAATTTGGATTAAAGGTGGTGTGATTTATAGATAAGATTGAGATTCT  
TTTGTTTAAATACTACTTAGTTAAACACTTGTAAATTAGTGCTCAACCAAATGGTGCTCAA  
TCATGTGAAATATCTATGTAGAAATCATAACAAGCTGGCCTATAATCTAAAATTAAATTT  
CCAAGTCCTCACTCAAATACATGTCGAAAAATTTAAAGTTCTTCATTTATTGGTGCCACT  
CAATAGAGTCTCTGTCTAATTCTCTACTATGATAAAAAAATCATTGATCATACGAAATT

GCTCCTCCCCACTTTCTCACGCGGCTTTCTGCTTCTTCAGCCTGTTTTTTCCAGTTTCG  
TATTGAAGTGACGATTATAAGGATTGTAGTCTGCAAACTATGCCTGCAATCATCCCTGA  
CCAAATACCC

>**Gsoja\_MSTRG.28715.1** GeneID=Gsoja\_MSTRG.28715;Strand=-;Pos=Chr07:9570506-9571093,

AACATTTAATATTAGAGAAAATAGCAAAAATGTATTTAGATTAAACATAATATTTTTTTTT  
ATTAATATCATACGAAATTCTATTAAATTGTGAACCATTCTCTCCCACTGCTAATTTA  
GTCTTTGGTTTGATTTTAACAGCCTAATTATGAATCTACGAGGGCACTTTCCTTTTATAT  
ACAAAATAGTTGTACCAAAAAAATGTTCACTAAAACTGCTTTTCTAAATAATCAGAAT  
CACTAAGCATAATTACTGTTCAACTGTGGAAGATTTTCATTTTGGTCTCTTGGCAGTGCA  
TTTGCATCAGTTGGCACTCCGTTGCTTCTTATTCTTTTTGCTGCCTTATTTGCCTGAACA  
GTATATATAAAGATATTGCGTTATTGATGGTATGATCCAAAGTTAGAATTTTTTTTATAG  
ACAAATATTAATTATTTATTTATTAGTTTTTATAAGCAGACAAATGAAGATCGAATGGGT  
GACCTTTCCTCATTCTTTCTTTCTCAACCACCGACCAATCTTACATTTCTCCAAAAT  
TGAAAATTGATAACACCAGTGATTTGAACGAAGACTTACTTCTTTCTC

>**Gsoja\_MSTRG.61707.49** GeneID=Gsoja\_MSTRG.61707;Strand=+;Pos=Chr14:2477086-  
2477438,2477466-2477912,

GAAAATGATTGGACAAGAACACCTAAATTTGTTTCATTAATTATTATTGCAACATCAAA  
TGTTTGTTTCACATATATTAGACAAGTTTTTTTTTTTGAATAAAGCAACTTCAAAGCACC  
CATCATTTTTATTATACTATTTCTTCTTTGCCTTAATCATGAGCTTAATAAAGTTTTCA  
TCCTGAAGTTGTAATTGGTGCTCTTGGTGGCCCTGAAATTGTAATCGGTGCCCTTGGCGA  
CCCTGCCTTTGGTGGCCCCGAAGTTGTAATCGGTGCCCTTGGTGGCCCTGCCTTTGGTGG  
TCCGAAGTTGTAATTGGTGCTCTTGGTGGCCCTGCCTTTGGTGGTCCTGAAGCTGTAAC  
TGGTGGCCCTTGGTGGCCCTGCCTTTGGTGGCCCTGAAGTTGTAATCGGTACCCTTGGGGG  
CCCTTCCTTTGGTGGTCCCGAAGTTGAAATTGGTGCTCTTGGTAGCCCTGCCTTTGGTGG  
TCCTGAAGTTGTAAGTGGTGGCTCTGGTTCTGAAGCTGTAAGTGTGCTTGGTGACCC  
TGCTTTGGTGGCCCCAAAGTTGTAATAAGTACCCTTGGGGGCCCTTCCTTTGGTGGCCC  
CGAAGTTGAAATTGGTGCTCTTGGTGGCCCTGCCTTTGGTGGTCCTGAAGGTGTAAGTGG  
TGGCTCTGGTTCTGAAGCTGTAAGTGTGAGAACAATAACAAGTAGTAGATGAAAAATTGC  
AACAAACACTTTCTTCATTTTGTAACGAATTTCTATCTCAATAAACTTTTTAGGATAC

ACTTGTATTTTGATGGGAAT

>**Gsoja\_MSTRG.61707.2** GeneID=Gsoja\_MSTRG.61707;Strand=+;Pos=Chr14:2414297-2414306,2477172-2477438,2477763-2477912,

ACATTTTTTTTTTTTTTTTTGGAATAAAGCAACTTCAAAGCACCCATCATTTTTATTATA  
CTATTTCTTCCTTTGCCTTAATCATGAGCTTAATAAAGTTTTCATCCTGAAGTTGTAATT  
GGTGCTCTTGGTGGCCCTGAAATTGTAATCGGTGCCCTTGGCGACCCTGCCTTTGGTGGC  
CCCGAAGTTGTAATCGGTGCCCTTGGTGGCCCTGCCTTTGGTGGTCCCGAAGTTGTAATT  
GGTGCTCTTGGTTGCCCTGCCTTTGGTGGTCCTGAAGGTGTAAGTGGTGGCTCTGGTTCT  
GAAGCTGTAAGTGTGAGAACAATACTAGTAGATGAAAAATTGCAACAAACACTTTC  
TTCATTTTGTAACGAATTTCTATCTCAATAAACTTTTAGGATACACTTGTATTTTGA  
TGGAAT

>**Gsoja\_MSTRG.5534.1** GeneID=Gsoja\_MSTRG.5534;Strand=+;Pos=Chr02:7845482-7845723,

CAAAACACTAAACCCAGAAACATTGGTGAGAGAGGTCGCAATAGCAACACTTGAAAGAGA  
GAGCTGGTTAAGATGGCCAACCATTACTAAGGACACCACTGGCAAAAGGTATTGTAACAC  
ACTTGAAACCGCCATTGGAGCTGCTATAGTACCCACCTTCTCAGCTCTTCCCTCATTTT  
CATCCATCCCCACTTTCCTGTGCAACTTTCTCCATCACTGCACCCTTTTATCATTTTTG  
TA

>**Gsoja\_MSTRG.52475.12** GeneID=Gsoja\_MSTRG.52475;Strand=-;Pos=Chr11:45344092-45344898,45345073-45345162,45345262-45345336,45345511-45346404,

AAAATTAATTATGAGACGCGATCTCATTTGTCCAAGTAAAAATATTAGAAAAAATATATA  
AAAGTGTTCACAATTACTATATACTATACTCAAGTTCCAAAGAAAGTTTGATTTTCTA  
ATCAATAGTGGTACTTAGAGCAGCACCGACCAGAACTATAACTCAAGTTCCAAAAAAG  
TTTGATTTTCTAACCAAGAGTGGTGCTTAGAGCAGCACCGACCAGAAATGGTTAGTGAAT  
ACACTCCAAACCGCGACGGCGTTATAGACGACGCACCGTTTAGTCTGGCTGGCGTCGTTT  
CGTTGACGACGACGGCGTTTGAGATGATCCCGACGACGACGACGGCGAGGGGGTTGTTG  
CCGCCGACGACGGTAATGGCGGCGATGTTGCCGGGGTGAGGGAGGAAGAGGGTGGGTAAG  
TGGGTGGTGCAGTTGAAGCAGAAGGTGGGTAAGATGGAGAGAGTGAGGTTGAGGGAGGGA  
TGGTGGATGGATAGGGCGATGATGGGTAGGGTGGTTGAGATGTTGGGGAAGGAGTGTGTTG  
GAGGTGTTGGATTAATGTAAGGTGGTTGAGATGTTGGGGAATGAGAGTTTGGAGGTGCTG

CAATGGAAGGAGGTTGGGAAGTGGGTGAAGGAGTGGTGTGGAGGTGTGGGAATGTAAG  
GTGGTTGAGATGTTGGAGATGGGGTTATTGGAACAAAGGGTGGTTGATGGGCAGGGGAAG  
GCGTTTTTGGAGGGGTTGGAGTGTAGGGAGGTTGAGAAATAGGAGAAGGAGTGTGGAGG  
GAGTTGGGACATAAGGTTGGTTGCCAGGGGGAGGTGTTTTGGAGTAGTAGTGGGAACAT  
TTGGAGGACTATAAATTGGAGAAGGTGTCTTTGGTGGTGTGAAACATAGGGAGGTTGGT  
TATGAGGGGAAGGAGCATTGGAGGACTATAAGCAGGAGATGGTGTGGAGGAGTAG  
GAACATTTGGTTGGTTATGAGGGGAAGGAGCATTGGAGGACTATAAGCAGGAGATGGTG  
TTTTTGGAGGAGTAGGAACATTTGGTGGAGTGTAATAGGTGAAGGTGTTTTGGGAGGAG  
TGGGAACATTAGGAGGATTATAAGAAGGAGAAGGTGTTTTGGAGGTGTAGGAACATAGG  
GTGGATTGTTACTAGGGGAAGGAGCTTTGGGGGAGGTGTACACAGGAGAGGGTATTTTTG  
GAGGCGTTGGAAAATTAGGAGGAGTATAAACTGGGGAAGGAGTTTGTGGAGGAGTTGGAA  
TATATGGAGGATGATTAGCAGGTGAAGGTGCTTGAGTGGGAACATTGGGAGGAGTGTATA  
CAGGGGAAGGAGTTTTTGGAGGTGTTGGAACATTAGGTGGATAATGAATAGGTGAAGGTG  
GTTTTGGATGAACATAGGGAGGGCTGGAAATAGGTGAAGGTGTTTAGGAGGAGGTATTG  
GAACATAGGGTGGATGATAAGGAGTTTCTGGAGGAGTTGGAACAGTTGGAGTTTGAGGAG  
GTGCTGGAACATAAGGTGCTCTCGGAGGAGTAATTGGAACATAAGGAGTGTGGAGGGG  
TTGGAACATAAGGTGGATTTGGATGATAAGGTGCTTTGGAGGAGTAATTGGAACGTAAG  
GAGTGTGGAGGTGTCGGAGAATAATAAGGAGGTGGCTCTCTCACAGCCAACACCACAA  
TAATCAATTTCTGACCCTTCTCACAATTATCATCTTTCCCACTAATGAAGTAAAATGGAC  
CCGATCTATCAAAGTAACTCCGAGTCACCATCCTCAAAGTCTTGATCGGGTCTTCT  
TGTTACATTTCTCATAATCATCATTGTTACCACCAACACAGTATCTGAGTCCTTCTGT  
ACTTAA

>**Gsoja\_MSTRG.77238.2** GenelID=Gsoja\_MSTRG.77238;Strand=+;Pos=Chr17:40635557-  
40635865,40636048-40636151,

TGATTTATAGATAAGATTGAGATTCTTTGTTTAAATACTACTTAGTTAAACACTTGTA  
T TAGTGCTCAACCAAATGGTGCTCAATCATGTGAAATATCTATGTAGAAATCATAACAAG  
CTGGCCTATAATCTAAAATTAAATTTCCAAGTCCTCACTCAAATACATGTCGAAAAATTT  
AAAGTTCTTCATTTATTGGTGCCACTCAATAGAGTCTCTGTCTAATTCTCTACTATGATA  
AAAAAATCATTGATCATACGAAATTGCTCCTCCCACTTTCTCACGCGGCTTTCTGCTT  
CTTCAGCCTCTCTTTTCCAGTTTCGTATTGAAGTGACGATTATAAGGATTGTAGTCTG

CAAAACTATGCCTGCAATCATCCCTGACCAAATACCCTGAATTACACAGGCAT

>**Gsoja\_MSTRG.47510.1** GeneID=Gsoja\_MSTRG.47510;Strand=+;Pos=Chr11:1887315-1888221,

TTGTGTTTTCTTTCTTTGTATGAATGCATGCGTCTATGCTCTGCCTCTTTAAAATTAG  
CACACCTAGAAAGAATCAATTTGATGCAAAAAATATAAAAGAATGGAGGTGACGTCGTT  
GTGATGATCAATCAAATAATAATGAATCAGAGCAATATTCCTTGGTAGCGCAGGAACTG  
AAGAAGCAATTCTGATCTTGTTCTCAGACGATGATGTGAGTTCTTTGGCTCTTTGAACT  
TGGCCCTCCCAATTGGTGCGAGCCAACACAATTAACATGGTGAACATACAAGAGGCTTGG  
GCGGCCAATAAACCAAGCCACAAGCCTTTGAAATCAAAGCCGGCAAAGAACTCAACCTC  
ACCGCAACGGGCATTCCCACTAGATAGAAGCAACCCAAATTTATATTCGCTCCCAACTTG  
GGCCTCGCGGTTCCCCTCAAACGCCACAAACCGTTGTTTTCGGACAGTTTCCAATTTCG  
CAGAGCCCAATGATGGGCAACACCATCGACGTCAAAGCAATGATCTCCGCGTCACGTGTG  
AACATCGAAGCCCACGCTTGCCTCACCAGAACGGCGAAAAATAATGCCGAGAAACCCAAA  
CCGTAAGTATACATAACCCACCAAGTGTGCGACTTTTGCCTTTTGGGATTCTCCGCA  
CCCAGTTCATTTCCGACACGTGTGGAAACCGCAAAGCTCAGGGAAGATGGGAAAATGTAT  
ATCAGAGCAGTGGTTTGTATCAGAACCCCATGATGCAACCGTTGCTTGGGGATTAATC  
AATAACCCGCAAAGTAAATCATGATTTTCGTACCACCACCTCGAGGCATACGGAAATG  
CAACTTGGAATTGCCAAATTCAAAAGCGATTTCCAACCGCTCAAGATGCCCTTCAACGAA  
ACACCTG

>**Gsoja\_MSTRG.47511.1** GeneID=Gsoja\_MSTRG.47511;Strand=+;Pos=Chr11:1888673-1889280,

GCCCATGGCGAGGCCCGAGAGAATAGAATAGCCCGTGATGTTGGCGAATCCAATGGCGAG  
AGAGCCACCAGCTAAGGCAAGCTCACCCACACGACCGAGGAAGAGCATGGAGATTACGGA  
GCGAGAATAGAGTAATAACCCGTTAGCACCATGGGTAATGCTATGTTGGCTATGCATTT  
GACTTCGTTGAGAGCGAGGGAAAAATGGGTTTTAGTTTGATGGTTATTTTGGCCTTGTTT  
GAATAATGTTGTTGGGGGTTTGGGGATCAAAGGGGGAGCATGTGAGCTGGCTCCTCATG  
AATTTTGGTTGTGGGCATGTTTGGATGGCCCTCATTGCTATCACACAAAGTGGAGGGAGA  
TGACGATAACTGGCACATGGCTTGACGGAGACAGAGATATTTAGCTAGGGAGTACTAAG  
TGTTTGTGTGTAAGTCACAGAGAAAATCTTGGTTGGTTTGGGGATTGCAATTTGCAAGA  
GTGTGTGAGGAGAGGTATTTAAAAGAGATTCTTGGACGTATCTGAATTTATTTATTATGG  
AGTATCCGGGACGGCCACTAATGGAAATGGAAAGATAGGGTTGACAGAGTATTGGCGTTT

CCGAGTAG

>**Gsoja\_MSTRG.41608.1** GeneID=Gsoja\_MSTRG.41608;Strand=-;Pos=Chr09:45513654-45515073,45515411-45515983,45516125-45516465,

CACCAACCCACATTCAATTCTCCTTTTCCAACAAAATTCCCTCTCCTAATCCTCCACCG  
TCCAATTCCCTGCATATTCCAAGATGATGAGATGTTGCCAAGTGGATGCTCACCTTTAA  
CTAGGTTATTTGTAGCCCTTGAGGCAGAATCGTGATGTTCAAGCAGTTTGTATTTTTTT  
TTTTATCTGTATATAGTTAAAACCCTGGCTAGTATCAGTTAGCTCTCGATACTAATATG  
GTGCATTCCATAGATGAGGAGAGAGCCATTGTCTCATCCTTCTACCGAAAATACTGCATC  
CTTCTTTCACACCTGCTTTAACGGAATCAATGCAGTATCAGTTCCGTACACTCTTGCATC  
TGGGGGCTGGTTAAGCTTGGCTCTTTTGTGCTATTGCTGCCGCGACATTTTACACAGG  
CGTGTTGATTAAGATGAATGGATAAGGATTCTGAATATCAGAACCTACCCTGATATGGG  
CGAACTTGCCTTTGGAAAGACGGGAAGGCTAATAATATCAGGGTTAATATACACGGAGCT  
CTTCTTGGTTTCGGTAGGGTTCTTGATTCTCGAAGGTGATAACTTGAGTAACTTATTTCC  
CACTGTGGAGATTCATACAGCTGGCTTAGCAATTGGTGGGAAGAACTGTTTGTGATATT  
GGTTGCCCTTGTCTTGGACAACTTGAGGATACTTTCTTATGTATCTGCAAGTAGGGTATT  
TGCTTCTGCTATCATTATTCTGTCAATATCATGGACTGCAACATTTGATGGAGTTGGGTT  
TCATCAAAAGGGAACCTCTGTTAATTGGAAGGGAAACCCACAGCTGTTAGCTTATATGC  
CTTTTGCTATTGTGCACATCCTGTGTTCCCGAGCTTGTACAATTCCATGAGAAACAAACA  
CCAATTCTCTAATGTACTACTTGTAGCTTTCTCTTAAGCACTGCTGGTTATGCATCCAT  
GGCTATAATTTGTTGCCTAATGTTTGGTCCCAAGGTTGAATCACAGGTCACATTAAACCT  
GAAAATAAATAAGTAAGCCCGAAAATAGCAATATGTACTACCTTGGTCAATCCCATATC  
CAAGTTTGCTTTGATGGTAACACCTATTACCAATGCTTTGAAAGACTTGCTTCCAAGGAC  
TTACAGGAATAGAGCGACCAGAATCCTGATTAGTACTGTCTTAGTAATCAGAACTACTAC  
TGTTGCCCTTGTGTTCTTTCTTTGGGTATCTCATGTCCCTTTCTTGAGCGTTTCTAAG  
TGTTACAGCTTCTATTATGTTTCCATGCCTTCGTTACTTGAAGATTCAGGCACTTAGAG  
AAAATTTGGGTGTGAGATAGTAGCCATGGTGATAATAATAATAGCACCTATAGCAATGGG  
AATAACCGGGACCTACACCTCTCTCATGGAAATAGTGCATCATTTGTAAGGAAAATGTAA  
AAATTACACCCAATTTTTTTGGGTGCATGTATATGAAAGGAAGAAATTTTGGCGTGAGAT  
AGTCAGCATGTTTCGCGTGTGTTGGACACACGATGCCAAGGTCATTTGACGTGAAAATCCAC  
GTTTGGATAGAAGCTAGTATTAGCATGCACGTTTGGTTCCACGATTTAGATGTGATTTTC

AGAAGCTAACAGTTATATCAAGATAGGTTCTGATGTAGATGAGCTTGCAATTTGGAAAGAC  
AGGAAGGCTAATAATATCAGGTTAATATACACGGAAGTAGCTCTACTTGGTTTTAATAGG  
TTCCTTGATTCTGGAAGGTGATAACCCGAGTAACTTATCCCCAATGTGGATATTCTTAG  
TTTCTTGCACTTTGGCTTGACAATTGGTGGGAAGAACTCTTTGTGATATTGGGTACCCT  
TATCATCTTGCCCACTTCGGTTGAACAACCTGAGTTATGAGGTGATGAATGAGTTTTTAA  
AAAGAGAAGGGATGAGGTGTGCAGGCTATGGCCAGAGTAGAGAGAGACAGGTATTGTGTG  
TGTGATAGAGGTTAGAGAGAATTGTTGGTGAGTGTTAGGTGAGGTCACGGTAGTTGCGGT  
GACAGAGAGAAATATTTGATTGGTATGGCATGTGCATGTAATGAGAGACAGAATGTGTGA  
GTTTTGTTTAGTTATTTGTGTGTGAAATTGCAGTGCATGCGAGTAATTAGTGGCCGGGGA  
GTGTGTGAGAAGAATGGGAAAAAGTTCGTTACACTGATCAATGTAAACCAATTATGTCC  
ATCTTATGATTCTGCAAAAAAGAAGTTAATTTATTTTATAAATGATCAATGATAAATA  
AATATGATTGTATAAAATTATTATTGTGATCAATATTGATCACACATGATTAAC

>**Gsoja\_MSTRG.40293.1** GeneID=Gsoja\_MSTRG.40293;Strand=+;Pos=Chr09:38830162-38830941,

CCAATATGCAATACAAAAGCAAACACGATAGATGATGGAATCCCAACTATATAGTATGAC  
CCCAGATTGACAAATGCACCAATTTTCTGCCAACCATCCTCTAGCAGTGCCTGAATTA  
TTGTTGACAAAGTGAAAAAAGAAAGTTATACATCATCTATTTTCATGCTTATGTGATGTGC  
AAGAAGGAAATGTGGGTTCTAAAGAAAATTGGCCACAAAATGAACTAATTCCGTTTAAAGT  
CTTAAGTGTGAGTATGCCTCGCATATTTATGCAATATGCATTGGAGAAATTTAAACTAA  
AGAAAATCAAATCTTACAATTGCTTCACTGAAAGCTTCACATACACTCATTTGTACTATG  
CACACATGTTCTTTCCGGGTATTGGCCCATAGTAACCAGATGTCAATTGACTGTATACT  
ATTTGCATTTTTGTATGTGAGATGTATTGGAAGTTCCAATATGCCTCTCAGCCTATACCA  
GTGCTTTTGAGTCATAGCTCCTGTGCAGACAAGTAAAAGTAATGGGGGAAAAAGAAAAACC  
TGAAAGAACACATTGGAGTCCATCCAGAAAGTTGGATGCTGCCAGAATTGGGAACATAGT  
TGCTACATATTCGACCACTTCTACTTCATTGCTATATGCATAGCCCCAGATATTGCGTAC  
AAGTATCATCACTGTTCCCACTATGATGCCCTCAATAATTGCTAGTACTAAGACAACACG  
CACTGCTAAACGTGCATTCCACGGACGACCAGCTCCAAGTTCATTTGAGACACGAATGCT

>**Gsoja\_MSTRG.61248.1** GeneID=Gsoja\_MSTRG.61248;Strand=+;Pos=Chr14:252124-253126,

AGTTTTTGTATCCTTAAAACCGCGGAAAATGCCTTGAAGAGCCAAAGAAAGTACAACAGC  
AGGAGCGCCAACAGCTCTTAAAGAGAGAAAGTGTCGTGCGGGAACATATGTTGGATTTTG  
CTGATGAAAAGGAGAAGACAATTGATATACTTGGAAGAGGATACAAGAAATATAACGCAT



AAAGTAGAGGGTGAAAACATACTGTAGGAACACCAATTAAATGGAGAAAAGCTCCAGCTC  
CCAGGTATAAAGCTAAAGCCTCAAAAAAGCCAAGGGCGAGTGCCAATAGCAGAGCAGTGG  
AGACAGAGGAGAGTTGTTGTTTTGTTTTGGCATCTGCAGCGGAGGAAGACTTGGCAATGT  
CCTCGGCAACAAAGGAAGTAGCAACACTTAGAAGGGGGATATTA AAAAGCTTAGAAATGA  
TGTTAAAGATGGATATGGAAACGCCGGCAGAAGCCAATTCAACGGTGCCAAGTCGACCAA  
TGTAGGCGGTTTCCATCAACTGTGCTAAGGGGTCAATTGCCTGACTGGCAAGGGCGGGCA  
GAGTCAGCGATATAAGCTCTCGTTTGACATCCACAGAAGCAGAATCTGAATGATGTTGGT  
CCTCAGAAGTGTAGGAAGAGGGTTTAGAGCCAAGGGCTATGAACGGCGAGGAGAGACTTG  
GGCTATGGCGCAGGAAGTGGTGGTGGGGTGGTGGCCATAACCGAAACTGATATGGTTGC  
GCTTGCGCAGGAAGGGTATTCTGGTGAAGCCTCCATGATATTGAAGTTGGTATTGAGAGG  
TGGTGAAATGTATAGCCTCCATGAGCATCAGCGCTGCACTGCAACAAAGTACAAAGTTGA  
ATAATCCATCAACATGGAAATAAATATCAAATAGCAGACTCGACTCCACCTGCAGCCCCAC  
AGAATGTATCGTCGCCCTCTGCAATTGAAATTGTTAGCCGATGATTGCAACGTTTTCTT  
TTATAAATTTCAACAACGCCCATTTGCCAACAATTTTAGTTCC

>**Gsoja\_MSTRG.40294.1** GeneID=Gsoja\_MSTRG.40294;Strand=+;Pos=Chr09:38831463-38832003,

AAACCATAACAGCTGAAGGAATGGCAAGCCTCACAAATGAGGGAATGTTATGCAGTGCCT  
CTTTGGAAAATCCTGTCCAAGATTTTGCACATGAAGGAGAAAACATGACATAGAGTGAGA  
GTATAGTAACATTCAACCAATAAGATATAGAATTTGCTACAGCAGCTCCTCTGTTCCCAA  
GTCCAGACTTGAAAAGTAACTAGAACATATAAGTACATGTAGTAATGTGGTAATTGCAG  
AGCTGCACATCATTGGGAATACAATATTTGGGTTTGTAGAAATCTGTTGAGGCACAGTA  
GAAGGCCATAAGCAAAAAGGCTTGGAAGCATAAACCTAGCATAACTCCCGGCTTCTGCAG  
CTATTTAGGATCCTGGCCAAGGAAAGTTAGAATGGACCTTGTGTTTGCCCAAATAATTG  
CAAGCGGAATGCTGACGATCATGAGAGTGAACATGGCTCTCTGCAAGTGTATGCCTAACA  
TGTGATACTGCTTTGCTCCATATGACTGGCCACAAAACGTGTCCAAGGAACTTGCCATTC  
C

>**Gsoja\_MSTRG.57216.1** GeneID=Gsoja\_MSTRG.57216;Strand=-;Pos=Chr12:39969695-39970055,

AGATAAGACGGGTTGAATGCCATTGAGGACAAGAGAAAGGGCAAGGAGTGGACAAAGATC  
TGAAACTGCAGCAGCAACCTCTTACCCCCTGTGAAGGCATAGCTAATGACATCTCTTAA  
TGCAAGAACCACAGTGCTGCAATTACTGATATTATGAAAGAAATCACTGTCACCACAAC

CACCGAAAACGATGCTGATTTTGGACTTCTTGCTCCTAGTTCGTTGCTCACCTCACGCT  
GCATTATATATTCTCACAGTATATAATATATAATAATACTTGCAAATTTACGAAATAAA  
TAAATAAAAAACAGGAATCCAATTACTACCTGCAGCTGCATTGAATCCAACAGAGATCA  
T

>**Gsoja\_MSTRG.82273.2** GeneID=Gsoja\_MSTRG.82273;Strand=-;Pos=Chr19:96440-96462,158281-158457,178085-178100,

TCTAATTATTAATAAGTCCCTCGAATTTAGGGGGCATGGGGATTGTAATTCTTTCAACT  
TCTAGAGGTATAATGACAGATCGAGAGGCTCGATTAGAAAGAATTGGCGGAGAAGTTTTA  
TGTTATATATGGTAATCTTTCTAACACCCGAATTATATGAGAACTTCGATCCATTTTTG  
GTAAAAAAAAAAAAAAAAAAAAAAAAAAAAAAAAAAAA

>**Gsoja\_MSTRG.39210.1** GeneID=Gsoja\_MSTRG.39210;Strand=-;Pos=Chr09:18276833-18277083,

CTCCACACACCGGCAAACATGCGAAGACTCATGTAGATGGTTAGTGCAATCCATATCCCA  
ACGAAACCTTTGCTCTTAGAGAGAAGAAACAATGAAGCAACACTTGCCAATGACACGGTG  
ACCTGAACAAATTATGAGCATAGAAATTTGCTAAATAAATTTGATAGAGATGACGAATAC  
TTTTTTTTAATAAAAAGTTATTGTATGAGAGAACTTACCAAGGAGTATGCAGAATATGCAA  
AATCAGATGCC

>**Gsoja\_MSTRG.66726.1** GeneID=Gsoja\_MSTRG.66726;Strand=+;Pos=Chr15:8376864-8377489,

AAACTGAGATAGAATCAAGAGAGAGTTGAGGGTTATCAAGCAAGCCAGTAATGAGCACGA  
GCACCTGAAAATACCAAGTCTCAAACACAGCATCACCGCGGACGCAGCCGATAGCTTAA  
CAAAATCCCAGAGTCCAGAGAATGCCTCAACACTAAACCCACTCCACGTATCCTTAACT  
TTGAAGCACTAACAACATACAAAACTGTGCCCAACAATGATCCACCAAGACAACTCA  
GCATCAACGACGAACCCATGATCCCAAACCCTAACTTGACACCACCACCCAGCTCAGCG  
CCACGTGCAGCACCAGCGTGGCAGCGGAGATGTATGTGCTCGGCGCCACCACGCTCTGCG  
CCTGCAGAACTTCTGTATGGGGAAGTTCACTGCGTAAGCGAAGATCTGCGGGATCAGAC  
CGTACACGAACATCGCGGCCACTGATGCCACCTCCGGTGGCTCCCCAGCAAGAGAAGAA  
TTGGTTTGCAGAAAATGTACACCACCGTTAAGGGAATCCCTGTTATGGTTAGCACGATAA  
TTGCTCTCTGCATGTATATCCCTAGCATTTTCATATTTGTTCGCTCCGTACGCTTGTTCCAC  
ATAAAGTCTCCACCGCACTTCCCATA

>**Gsoja\_MSTRG.52475.35** GeneID=Gsoja\_MSTRG.52475;Strand=-;Pos=Chr11:45344812-45345072,45345247-45345366,45345415-45345497,

GGAAGGAGCATTTGGAGGACTATAAGCAGGAGATGGTGTTCCTTGGAGGAGTAGGAACATT  
TGGTGGAGTGTAATAGGTGAAGGTGTTCCTTGGAGGTGTAGGAACATAGGGAGGTTGGTT  
ATGAGGGGAAGGAGCATTTGGAGGACTATAAGCAGGAGATGGTGTTCCTTGGAGGAGTAGG  
AACATTTGGTGGAGTGTAATAGGTGAAGGTGTTCCTTGGGAGGAGTGGGAACATTAGGAGG  
ATTATAAGAAGGAGAAGGTGTTCCTTGGAGGTGTAGGAACATAGGGAGGTTGGTTATGAGG  
GGAAGGAGCATTTGGAGGACTATAAGCAGGAGATGGTGTTCCTTGGAGGAGTAGGAACATT  
TGGTGGAGTGTAATAGGTGAAGGTGTTCCTTGGGAGGAGTGGGAACATTAGGAGGATTATA  
AGAAGGAGAAGGTGTTCCTTGGAGGTGTAGGAACATAGGGTGGAT

>**Gsoja\_MSTRG.66724.1** GeneID=Gsoja\_MSTRG.66724;Strand=+;Pos=Chr15:8371058-8371331,

CTTAAATTATTTGAAGCATATTACTTGCAAATTTCCAAGCATACATAAGAAAAAAC  
AAAACAATAATTCATCAACTTTCTTTCTTTAATTTCCAGTGAGAACTCGAAATCCG  
AACCCACAATCTCTGTTAGGCCAATGGTCAGCAGAAGAACCATTTCAACTCTGAATCTT  
AGGTTCTTCTTGTACCCCCACTTATTTAATCGTTTCTTGTCTGATTACCTGCATGCA  
TCATAATGTACGATATATGGATGTTGACTTAATT

>**Gsoja\_MSTRG.9426.1** GeneID=Gsoja\_MSTRG.9426;Strand=+;Pos=Chr03:461641-461920,467578-467757,

CTTGACTTGCAAGTGAATAATGTTACCAAGCACTATTCCAAGTGAATACCTATGAGGTA  
ATAACACCCTATGTTACATATGCTACAATGCTTTGCCACCCTGCTCCAACAGCCACCCC  
TATTGAAATCATATAATTTATGTCGTTGAGTGTAAAAACAATAGGGTTCAAATCTTA  
AACTATTAAAAGTTCTTTAAACCAAGACACCAAGATTATATAAGCATACCTGAGAGTACA  
GGTTGAATACTGTTTAGTAACAAAGAACTGCTAACAAGGTGACAAATCCCCACAGCA  
GTAGCCACATCTTCGTTTGAAGTAAAGAGATAAGCTACTTTTCTTTAAAATTAAAAAA  
AGAACAAATAAGATAAACCAATTGCAAATGATGTAAGCACTGTCACAACTATAGAGAAC  
TTTGCAGCTTTGGAGTTTTCCCTTCCAAGTTCATTTGCCA

>**Gsoja\_MSTRG.52475.34** GeneID=Gsoja\_MSTRG.52475;Strand=-;Pos=Chr11:45344787-45345006,45345181-45345246,45345421-45345540,

GTGTCTTTGGTGGTGTGAAACATAGGGAGGTTGGTTATGAGGGGAAGGAGCATTGGAG  
GACTATAAGCAGGAGATGGTGTGTTTTGGAGGAGTAGGAACATTTGGTGGAGTGTAATAG  
GTGAAGGTGTTTTGGGAGGAGTGGGAACATTAGGAGGACTATAAATTGGAGAAGGTGTCT  
TTGGTGGTGTAGGAACATAGGGAGGTTGGTTATGAGGGGAAGGAGCATTGGAGGACTAT  
AAGCAGGAGATGGTGTGTTTTGGAGGAGTAGGAACATTTGGTGGAGTGTAATAGGTGAAG  
GTGTTTTGGGAGGAGTGGGAACATTAGGAGGATTATAAGAAGGAGAAGGTGTTTTGGAG  
GTGTAGGAACATAGGGTGGATTGTTACTAGGGGAAGGAGCTTTTGG

>**Gsoja\_MSTRG.26930.1** GeneID=Gsoja\_MSTRG.26930;Strand=+;Pos=Chr06:48017638-48017864,  
AAAACACTAAACCCAGAAACATTGGTGAGAGAGGTTGCAATAGCAACAGTTGAAAGAGAG  
AGCTGGTTAAGATGGCCAACCATTACCAAGGACACCACTTGCAAAAGATATTGCAACACA  
CTTGCAACCACCATTGGAGCTGCTATAGTACCCACCTTCTTCAGCTCTTCCCTCATTGCT  
CTCCTCCTTTTCATCCATCCCCACTTTCTGTCTCTGAACCTTCTTC

>**Gsoja\_MSTRG.79812.1** GeneID=Gsoja\_MSTRG.79812;Strand=+;Pos=Chr18:23000838-23001216,  
TAAAGAGAAAATGACTCACCATGACCCCTTGTCAAGCTTGTAACCTAAAATAAGACCCA  
GAGGAATACCGAAAAAGTAGTAACAAGCAATATTCACGTAAGCAACCACAGCCTGCCACC  
CTGCGCCAACAGCAACACCTGAGAGAACGGGTTGCACGTTGTTGATGACAATGCAAAGGG  
CCAACATGGGCGTGAGCTCTACCACAATCTTCTCACTTCTGAATCATTTGAAAACAAGA  
AAGGGTACTGGTTCGGGAAGATTATCAGCACCATCGAGAGCATGACACCGATCAGAGTTG  
AAGTAATCACAGCAACAAGAAGTGAAAACCTTGCTGTTCTTGGGTGACATGCTCCTAGTT  
CATTTGACACCCTCACACT

>**Gsoja\_MSTRG.52475.11** GeneID=Gsoja\_MSTRG.52475;Strand=-;Pos=Chr11:45344092-  
45345162,45345262-45345336,45345511-45346404,  
AAAATTAATTATGAGACGCGATCTCATTTGTCCAAGTAAAAATATTAGAAAAAATATATA  
AAAGTGTTCACAATTACTATATACTATAACTCAAGTTCCAAAGAAAGTTTGATTTTCTA  
ATCAATAGTGGTACTTAGAGCAGCACCGACCAGAACTATAACTCAAGTTCCAAAAAAAAG  
TTTGATTTTCTAACCAAGAGTGGTGCTTAGAGCAGCACCGACCAGAATGGTTAGTGAAT  
ACACTCCAAACCGCGACGGCGTTATAGACGACGACCGTTTAGTCTGGCTGGCGTCGTTT  
CGTTCGACGACGACGGCGTTTGAGATGATCCCGACGACGACGACGGCGAGGGGGTTGTTG

CCGCCGCAGACGGTAATGGCGGCGATGTTGCCGGGGTGAGGGAGGAAGAGGGTGGGTAAG  
TGGGTGGTGCAGTTGAAGCAGAAGGTGGGTAAAGATGGAGAGAGTGAGGTTGAGGGAGGGA  
TGGTGGATGGATAGGGCGATGATGGGTAGGGTGGTTGAGATGTTGGGGAAGGAGTGTTTG  
GAGGTGTTGGATTAATGTAAGGTGGTTGAGATGTTGGGGAATGAGAGTTTGGAGGTGCTG  
CAATGGAAGGAGGTTGGGAAGTGGGTGAAGGAGTGGTGTGGAGGTGTGGGAATGTAAG  
GTGGTTGAGATGTTGGAGATGGGGTTATTGGAACAAAGGGTGGTTGATGGGCAGGGGAAG  
GCGTTTTTGGAGGGGTTGGAGTGAGGGAGGTTGAGAAATAGGAGAAGGAGTGTTTGAGG  
GAGTTGGGACATAAGGTTGGTTGCCAGGGGGAGGTGTTTTTGGAGTAGTAGTGGGAACAT  
TTGGAGGACTATAAATTGGAGAAGGTGTCTTGGTGGTGTGAAACATAGGGAGGTTGGT  
TATGAGGGGAAGGAGCATTGGAGGACTATAAGCAGGAGATGGTGTGGTGGAGGAGTAG  
GAACATTTGGTTGGTTATGAGGGGAAGGAGCATTGGAGGACTATAAGCAGGAGATGGTG  
TTTTTGGAGGAGTAGGAACATTTGGTGGAGTGTAATAGGTGAAGGTGTTTTGGGAGGAG  
TGGGAACATTAGGAGGATTATAAGAAGGAGAAGGTGTTTTTGGAGGTGTAGGAACATAGG  
GAGGTTGGTTATGAGGGGAAGGAGCATTGGAGGACTATAAGCAGGAGATGGTGTGGTGG  
GAGGAGTAGGAACATTTGGTGGAGTGTAATAGGTGAAGGTGTTTTGGGAGGAGTGGGAA  
CATTAGGAGGATTATAAGAAGGAGAAGGTGTTTTTGGAGGTGTAGGAACATAGGGTGGAT  
TGTTACTAGGGGAAGGAGCTTTTGGGGGAGTGACACAGGAGAGGGTATTTTTGGAGGCG  
TTGGAAAATTAGGAGGAGTATAAACTGGGGAAGGAGTTTGTGGAGGAGTTGGAATATATG  
GAGGATGATTAGCAGGTGAAGGTGCTTGAGTGGGAACATTGGGAGGAGTGATACAGGGG  
AAGGAGTTTTTGGAGGTGTTGGAACATTAGGTGGATAATGAATAGGTGAAGGTGGTTTTG  
GATGAACATAGGGAGGGCTGGAAATAGGTGAAGGTGTTTTAGGAGGAGGTATTGGAACAT  
AGGGTGGATGATAAGGAGTTTCTGGAGGAGTTGGAACAGTTGGAGTTTGAGGAGGTGCTG  
GAACATAAGGTGCTCTCGGAGGAGTAATTGGAACATAAGGAGTGGTTGGAGGGGTTGGAA  
CATAAGGTGGATTTGGATGATAAGGTGCTTTGGAGGAGTAATTGGAACGTAAGGAGTGT  
TTGGAGGTGTCGGAGAATAATAAGGAGGTGGCTCTCTCACAGCCAACACCACAATAATCA  
ATTTCTGACCCTTCTACAATTATCATCTTTCCCACTAATGAAGTAAAATGGACCCGATC  
TATCAAAGTGAAGTCCGAGTCACCATCCTCAAAGTCTTGATCGGGTCTTCTTGTTAC  
ATTTCTCATAATCATCATTGTTCAACCAACACAGTATCTGAGTCCTTCTGTACTTAA

>**Gsoja\_MSTRG.5533.1** GenelD=Gsoja\_MSTRG.5533;Strand=+;Pos=Chr02:7842648-7843173,

GGGACAGCAAAGCGAAAGAACTCTCCAACACCAACCAAAGCATTCTTGAGAAAGAGATG

CGTGTTTTCTCACAAGCAGAGGAATACCTCACAAAGGACAAAAGCATTATCACATTAAAC  
CAAACGCAAAGGCTGAAGGAGATTGCGGCACCAACATGTCCCAACCCCAGTTTAAAAACA  
AGGGTCCAACATGTTACTACGTGGAAGCACAAAGCTATAGCGGAGGTTAGAATCATGGGA  
GAAATCAAACCTCTGGGTCTGGAAAAATCGTGTTAGAGGTTTGAGAATTGCGGAACCAAAT  
AGAGCAGGTATTAGCCAAATGGCATATTTACGAACTTCAAGGGATATTGTTGGGTCTTGG  
CCTAATAGAGTTAATATTTTGTCAATTGAAAATCCATAGAATTGTGATCGGGAAACAAACC  
AAAGAAAGGGATATTATGGCAGTGTAAGTATATAGTCCAAATTTTTCATATTGCCCTGCC  
CCGAAAGCTTGCCACATAAAGTTTCCAATCCACCAGCCATCCCTG

>**Gsoja\_MSTRG.52475.16** GenelD=Gsoja\_MSTRG.52475;Strand=-;Pos=Chr11:45344112-  
45344844,45344941-45345102,45345355-45345366,45345463-45346411,

ACGACATAAAATTAATTATGAGACGCGATCTCATTTGTCCAAGTAAAAATATTAGAAAAA  
ATATATAAAAGTGTTCACAATTACTATATACTATAACTCAAGTTCCAAAGAAAGTTTGAT  
TTTTCTAATCAATAGTGGTACTTAGAGCAGCACCGACCAGAACTATAACTCAAGTTCCAA  
AAAAAGTTTGATTTTTCTAACCAAGAGTGGTGCTTAGAGCAGCACCGACCAGAATGGTT  
AGTGAATACACTCCAAACCGCGACGGCGTTATAGACGACGCACCGTTTAGTCTGGCTGGC  
GTCGTTTCGTTTCGACGACGACGGCGTTTGAGATGATCCCGACGACGACGACGGCGAGGGG  
GTTGTTGCCGCCGACGACGGTAATGGCGGCGATGTTGCCGGGGTGAGGGAGGAAGAGGGT  
GGGTAAGTGGGTGGTGAGTTGAAGCAGAAGGTGGGTAAGATGGAGAGAGTGAGGTTGAG  
GGAGGGATGGTGGATGGATAGGGCGATGATGGGTAGGGTGGTTGAGATGTTGGGGAAGGA  
GTGTTTGGAGGTGTTGGATTAATGTAAGGTGGTTGAGATGTTGGGGAATGAGAGTTTGA  
GGTGCTGCAATGGAAGGAGGTTGGGAAGTGGGTGAAGGAGTGGTGTTTGGAGGTGTGGGA  
ATGTAAGGTGGTTGAGATGTTGGAGATGGGGTTATTGGAACAAAGGTGGTTGATGGGCA  
GGGGAAGGCGTTTTTGGAGGGGTTGGAGTGATAGGGAGGTTGAGAAATAGGAGAAGGAGTG  
TTTGAGGGAGTTGGGACATAAGGTTGGTTGCCAGGGGGAGGTGTTTTTGGAGTAGTAGTG  
GGAACATTTGGAGGACTATAAATTGGAGAAGGTGTCTTTGGTGGTGTTGAAACATAGGGA  
GGTTGGTTATGAGGGGAAGGAGCATTTGGAGGACTATAAGCAGGAGATGGTGTTTTTGA  
GGAGTAGGAACATTTGGTGGAGTGTAATAGGTGAAGGTGTTTTGGGAGGAGTGGGAAACA  
TTAGGAGGATTATAAGAAGGAGAAGGTGTTTTTGGAGGTGTAGGAACATAGGGAGGTTGG  
TTATGAGGGGAAGGAGCATTTGGAGGACTATAAGCAGGAGATGGTGTTTTTGGAGGTGTA  
GGAACATAGGGTGGATTGTTACTAGGGGAAGGAGCTTTTGGGGGAGTGTACACAGGAGAG

GGTATTTTTGGAGGCGTTGGAAAATTAGGAGGAGTATAAACTGGGGAAGGAGTTTGTGGA  
GGAGTTGGAATATATGGAGGATGATTAGCAGGTGAAGGTGCTTGAGTGGGAACATTGGGA  
GGAGTGTATACAGGGGAAGGAGTTTTTGGAGGTGTTGGAACATTAGGTGGATAATGAATA  
GGTGAAGGTGGTTTTGGATGAACATAGGGAGGGCTGGAAATAGGTGAAGGTGTTTTAGGA  
GGAGGTATTGGAACATAGGGTGGATGATAAGGAGTTTCTGGAGGAGTTGGAACAGTTGGA  
GTTTGAGGAGGTGCTGGAACATAAGGTGCTCTCGGAGGAGTAATTGGAACATAAGGAGTG  
TTTGGAGGGGTTGGAACATAAGGTGGATTTGGATGATAAGGTGCTTTTGGAGGAGTAATT  
GGAACGTAAGGAGTGTTTGGAGGTGTCGAGAATAATAAGGAGGTGGCTCTCTCACAGCC  
AACACCACAATAATCAATTTCTGACCCTTCTCACAATTATCATCTTCCCACTAATGAAG  
TAAATGGACCCGATCTATCAAACCTGAACTCCGAGTCACCATCCTCAAACCTTCTTGATC  
GGTTCCTTCTTGTTACATTTCTCATAATCATCATTGTTCCACCACCAACACAGTATC

>**Gsoja\_MSTRG.52475.31** GeneID=Gsoja\_MSTRG.52475;Strand=-;Pos=Chr11:45344746-  
45344832,45345007-45345018,45345067-45345162,45345337-45345354,45345529-  
45345654,45345862-45346016,

TGCCGGGGTGAGGGAGGAAGAGGGTGGGTAAGTGGTGGTGCAGTTGAAGCAGAAGGTGG  
GTAAGATGGAGAGAGTGAGGTTGAGGGAGGGATGGTGGATGGATAGGGCGATGATGGGTA  
GGGTGGTTGAGATGTTGGGGAAGGAGTGTTTGGAGGTTGAGAAATAGGAGAAGGAGTGTT  
TGAGGGAGTTGGGACATAAGGTTGGTTGCCAGGGGAGGTGTTTTTGGAGTAGTAGTGGG  
AACATTTGGAGGACTATAAATTGGAGAAGGTGTCTTTGGTGGTGTAGGAACATAGGGAGG  
TTGGTTATGAGGGGAAGGAGCATTTGGAGGACTATAAGCAGGAGATGGTGTTTTTGGAGG  
AGTAGGAACATTTGGTGGAGTGTAATAGGTGAAGGTGTTTTTGGAGGTGTAGGAACATA  
GGGTGGATTGTTACTAGGGGAAGGAGCTTTTGGGGGAGTGTACACAGGAGAGGGTATTTT  
TGGAGGCGTTGGAA

>**Gsoja\_MSTRG.82125.1** GeneID=Gsoja\_MSTRG.82125;Strand=-;Pos=Chr18:56851923-56852396,

GAGAAAGGGATGCGTGTTTTCTCACAAGCAGAGGAATACCTCACAAAGGACAAAAGCAAC  
ATCACATTAAACCAACACAAAGGCTGAAGGAGATTGCAGCACCAACATGTCCCAACTCC  
AATTTAAATACAAGGGTCCAACATGTTGCTCCGTGGAAGCACAAAGCTATGGCAGAGGTT  
AGAATCATGGGAGAAATCAAACCTCTGGGTCTGGAAAAATCGTGTTAGAGGTTTGAGAATT  
GCGGAACCAATAGAGCAGGTATTAGCCAAATGGCATATTTACGAGCTTCAAGGGAAATT  
GTTGGGTCTTGGCCTAAGAGTGTTAATATTTTGTCCATGAAAGTCCATAGAATTGTGATT

GGGAAACAAATCAAAGAAAGGGAGATTACGGCAGTGTAAGTATATTGTCCAAATTTTCA  
TATTGCCCTGCCCCGAAAGCTTGGCCACATAAAGTTTCCAATCCACCAGCCATC

>**Gsoja\_MSTRG.82126.1** GeneID=Gsoja\_MSTRG.82126;Strand=-;Pos=Chr18:56853611-56854220,  
AGACACTCCATTATTACAAACACTACTTGTGTTGACATTCTGGTGTGTTTCTCTATTTTT  
CTTGTAACATTATATTATCTATTACATATTTATGTCTTTGCTTTCATTTATTTCTTTGTC  
TCTCTCGATGTTGATGTAGGTGTCTCATAACATTTCTTTGCGAAAACCATACTTTTCGTGA  
CAGATTGTATATCTCTGTACCAACTAGCTTTAAGCACTCGTCATGTGATTTGATTCATTT  
TCGTCTGGTGGTTTAGCATCAAATATTCTCTCCCTTGCCATCATTGCCTACAAAAATTGC  
ACAAATCCGACACCTAATTAACACCAAACATACAATATTTCTACATTGCAACAAAGAAAT  
CATATTGGGTTATTAAGGATAGTGTCAAATTTATAAATCGTGAACCTGTTTCTTCCAGTT  
GGTAAGAGCAGTAACAAGGGAAAGGAGAATCGATTGGACAATGGAGCCAGTGACTATTCC  
AATCCAGAGGCCCTTTGCTCTTAAATGTGCAACAAAGCCAAGTACGATACCTACAGGAAT  
TCCTACCAGATAAAATGCTCCCAGATTGACATAGGCTCCTAGATGTTGCCACCCACTTCC  
TCTAGCAACC

>**Gsoja\_MSTRG.5528.1** GeneID=Gsoja\_MSTRG.5528;Strand=+;Pos=Chr02:7816755-7816954,  
CCTGTTTTTCCCAGTTTGTAATGCTGTCTAGCAAAGCCAGTATTATTGTTTGTAGTGTAG  
ATCCGGTTAATATTCCAATCCAAAGGCCTTTACCATTGAAGTTAAGACCAAAACCAAACA  
AGAGAGACACAGGGATTCCCACGGCATAATATGCTACAAGATTGGTAATTGCCCTATCT  
TCTGCCATCCACTGCCTCTG

>**Gsoja\_MSTRG.52475.1** GeneID=Gsoja\_MSTRG.52475;Strand=-;Pos=Chr11:45317721-  
45317734,45344717-45344832,45345007-45345072,45345247-45345336,45345511-  
45345654,45345862-45346016,  
TGCCGGGGTGAGGGAGGAAGAGGGTGGGTAAGTGGTGGTGCAGTTGAAGCAGAAGGTGG  
GTAAGATGGAGAGAGTGAGGTTGAGGGAGGGATGGTGGATGGATAGGGCGATGATGGGTA  
GGGTGGTTGAGATGTTGGGGAAGGAGTGTTTGGAGGTTGAGAAATAGGAGAAGGAGTGTT  
TGAGGGAGTTGGGACATAAGGTTGGTTGCCAGGGGAGGTGTTTTTGGAGTAGTAGTGGG  
AACATTTGGAGGACTATAAATTGGAGAAGGTGTCTTTGGTGGTGTGAAACATAGGGAGG  
TTGGTTATGAGGGGAAGGAGCATTGAGGACTATAAGCAGGAGATGGTGTGTTTTGGAGG  
AGTAGGAACATTTGGTGGAGTGTAATAGGTGAAGGTGTTTTGGGAGGAGTGGAACATT



AGGAGGATTATAAGAAGGAGAAGGTGTTTTGGAGGTGTAGGAACATAGGGTGGATTGTT  
ACTAGGGGAAGGAGCTTTTGGGGGAGTGACACAGGAGAGGGTATTTTGGAGGCGTTGG  
AAAATTAGGAGGAGTATAAACTGGGGAAGGAGTTCTTGGAGGTGT

>**Gsoja\_MSTRG.32263.1** GeneID=Gsoja\_MSTRG.32263;Strand=+;Pos=Chr08:2663248-2664830,

CAGGATCAGCACGGGGTGTGTTGCTTTTGATCAAACAAACGATCAAGACGAGGGAGTCT  
CAGTAACAACACCCGTCAACGGCTGTTTCTGTCCGTCCATCACTCCATCTTCGACCAACG  
TCAGCAACTGGGCCCAGTGGGCTTCAAACCTCCAATCGGTGGTCCAATCACATACAACA  
TAAGACCCGCGCAACACACCTGGGCCGAGAGCAGGCCAGCCATAGCCCACAGAATCCAA  
CGTCAAACCAGAACCCAAGTCCAACCTGCCACGGGCATCCCGACCAAATAGAACGCGCCCA  
GGTTCACATTCGCCGCCGTGTTTCGGCCGCGCCGTCCCTCTAACGACGCCGCACCCACCG  
TCTGCGGACAGTTCCCGAGTTCGCAAATTCCGAGGATCGGCAGCGCCATCGACGTGATCC  
TTAATATGTCCTCGTCGGCGGTGAACATCGTCCCCACCGCCGCGCATCCCGACGGCGA  
AAAACATCGCCGAGAATCCATAATCGCTGCGAGAAAAACAGAAACCACCGCGGATAGTT  
TGGCCCGAGAGGGACGATTGGCTCCCAGCGCGTTCCCGACGCGAGTCGAAACCGCGAAAC  
CAAGCGAGGAGGGAAAAACATAGATGAGTGAAGTGATTTGAATGAGTATCCCCATGGAAG  
CAACGGTAGCGGTGGGGTCCACGAGAAGCCCGCAAAGAATGATCATGATCTCATACCACC  
ACCACTCCAAGCAAACGGAGACGCAGCTAGGCGCAGCGAGCCGAAGGAGCGGCTTCCAGC  
CGCTGAGACATTCTCGGCTCGGCGCGGAGCAGTGCAAGCCGAAAAGAAGACGGCGGCAC  
CGAGGAAGAGGAGGATGGAGAGGTTGGAAGCGGCGGAGGCAGCGGCGACACCGGCGAGGC  
CGAGGCGGAGGCGCGTGACGAGGAGGTAGTTGAAGGGGAGGTGGAGGAGGGTTCCGGCGA  
GGGAAGCTAAGGTGACAGGGTGGGTGACGCCCTGGGCGCGAAGGTAAATGCGGATTGGGT  
GGAGGAAGGAGTGGGTGAGGAGGTCGGGGAGGGAGAAGAGGAGGTAGGTGTGGGCCATTA  
GGGTGATGTTGGGGTCCTGGTGCAAGAGATCAACGAGGATGTTGGACATGTTGAGCCAGA  
GGAGTGATATTGGGATGGAGCAGAGTAACAGGAACATGACGCAGCGGTGGAGGGTCAACG  
ACAACACATTACGCGTTTTGCGCCGAATGCTTGGGAGCATAGCGGTTCCATCCCGAGTG  
CTAGACCCGACAGCACCGAATAGCCTGTGATGTTTCGCGAACGCCATTCCTAGGGACCTG  
CTGCCAGTTCTAGCTCTCCTAGGTGTCCCAGGAACAGCATCGATACCATGGAACGCGCGT  
AGAATATCAGCGCCGTTAAGGCTATCGGAAACGCCAGCTCCCCACCGCTTCACTTCTC  
TCCTTATGCTCCAACAGTGCTGCCCCCTTTTTCTACTGCTCCCTCCATCAACGTGTAAT  
CTACTACTTCTCTGTTTTTGATCCCATCTTAATGGATCCTCTCAAACCTCAAACCTGCAC

TCTCACTCTCACTCTCCTAAACA

>**Gsoja\_MSTRG.52475.21** GeneID=Gsoja\_MSTRG.52475;Strand=-;Pos=Chr11:45344733-45344832,45345007-45345162,45345337-45345558,45345862-45345960,

GTGGGTAAGATGGAGAGAGTGAGGTTGAGGGAGGGATGGTGGATGGATAGGGCGATGATG  
GGTAGGGTGGTTGAGATGTTGGGGAAGGAGTGTTTGGAGGACTATAAATTGGAGAAGGTG  
TCTTTGGTGGTGTGAAACATAGGGAGGTTGGTTATGAGGGGAAGGAGCATTGGAGGAC  
TATAAGCAGGAGATGGTGTTTTTGGAGGAGTAGGAACATTTGGTGGAGTGTAATAGGTG  
AAGGTGTTTTGGGAGGAGTGGAACATTAGGAGGATTATAAGAAGGAGAAGGTGTTTTTG  
GAGGTGTAGGAACATAGGGAGGTTGGTTATGAGGGGAAGGAGCATTGGAGGACTATAAG  
CAGGAGATGGTGTTTTTGGAGGAGTAGGAACATTTGGTGGAGTGTAATAGGTGAAGGTG  
TTTTGGGAGGAGTGGAACATTAGGAGGATTATAAGAAGGAGAAGGTGTTTTTGGAGGTG  
TAGGAACATAGGGTGGATTGTTACTAGGGGAAGGAGCTTTTGGGGGAGTGACACAGGAG  
AGGGTATTTTTGGAGGCGTTGGAAAATTAGGAGGAGT

>**Gsoja\_MSTRG.82124.1** GeneID=Gsoja\_MSTRG.82124;Strand=-;Pos=Chr18:56849921-56850147,

CAGAAACATTGGTGAGAGAGATTGCAATAGCAACACTTGAAAGAGAGAGCTGGTTAAGAT  
GGCCAACCATTACCAATGACACCACTTGCAAAGATATTGCAACACACTTGCAACCACCA  
TTGGAGCTGCTATAGTACCCACCTTCTTCAGCTCTTCCCTCATTGCTCTCCTCCTTTTCA  
TCCATCCCCACTTTCCTGTCTCTGAACCTTCTCCATCACTGCCTCT

>**Gsoja\_MSTRG.73450.1** GeneID=Gsoja\_MSTRG.73450;Strand=+;Pos=Chr17:2077621-2078263,

GTACAAAAGAAGGAAGAAAAGGTTGCTAAAATTGGCAACAAAGGATGAGATAGCGATTCC  
CGGCACGCCAAGGTTAAGTTTGAAGGTTAGAAAAGTGAGGGTTGGAAGGTGTAGAAGAAT  
GGATAGTAAAGTGCACCACAACAGTGGCCAAGTTGTGCCTTTACTACGTAGGAAGATTCTG  
AAGAGGGTGGAGGAAGCTATTGGCAATGAGGTCTGGAATTGCGAAGCGGCAATAGAGGGT  
TGCTACTCGGGTTATGTCTGGATTCTGGCGAAGGCATAGCATGAGAGATTGAGGTTGAG  
CCAAAGAAGAGAAATGGGGAGAGAAAATAGCAGTAACATGAGAATTGTTCTCTGCAAAGT  
TAGAGAGAGTAAGGACAAGTTTCGAGAACCGAAGGCTTGGGTGCAGAGGGGTTCCATGCC  
CATGGCTAGACCTGAGAGGACAGAGTAACCGGTTATGTTGGTCAAGCCTATGGCCAAAGA  
ACCTCCGGCTAATTCCAGGCTTCCAATCTTCCCATGCACACAATAAGGTCATGTTTTT

GAGGTAACCCACAAGACTCATGGCTGCTATTGGGAACCCTATGTCTGTCATTCTCCTTAC  
TTCTTCCAATACCTGCATTCATGGTAAATAAAATACAGACGTC

>**Gsoja\_MSTRG.438.1** GeneID=Gsoja\_MSTRG.438;Strand=+;Pos=Chr01:2766060-2766637,

GGTGTGTTTTGCAAGCACTCACCAGAGCATAACAGCAGAAGCAAGAGAGAGGCGAAAGAA  
CCCCCAAAGACTCCGAAACGCTTCCACGAGAACCCGTTCCACGCCGCCAGCACCACCC  
TCCGAAAACATAAACCAACTGGGCCACCACCACGAACCACCACGATCCGTTGAGCACGAC  
GGCGGCGCCACGAGCCCCACTCCAGCTTCACCATGAGCAGCCAGCTCAGCACCAGGGTG  
CAGCACCATGGCCATCCCGCTATCGCCGCGATCACCATCACCTTGCTCTGCGCCTGCAG  
GAACTTCGCCACCGGAAAATTCAGCGCGTAAGCGAACAGCTGCGGAATCATCCAAATGGC  
GAAGGTCCCCGCAGCCTCCGAAATTTGGTGTCTTGCCCTATCAACTTCAGAACTTGTC  
CGCGAAGATGTACAAAGGGCACAGTACACAGGCCGTGCTGAGGAGTAACACCCATGATCG  
TTGCATGTACACTCCCAGCATGTCCAGCTTCCCTGCCCCCACTGCTTGCCGCACAGCGT  
TTCCAACGCGCTTCCCATCCCTAGCTGCTCGGAATCAC

>**Gsoja\_MSTRG.9298.1** GeneID=Gsoja\_MSTRG.9298;Strand=-;Pos=Chr02:50466587-  
50466615,50537508-50538020,

ATCTTGATGTGCATTGGAGTAGATTAGTGTAGAGAAGAGGGGCAGGAGTGGAATTGCAA  
AGAGAACCGGCTGCAGTGTGAGGAAGAGAGAGATGGGGGCAAGAAGTAAATTAAGAATGA  
TGGCAGTGATGCATGAGGGGATGAAGGAAATTAGAAGGAGCGTGACCTACATGCCTCGAC  
CAGGGGGATGAGGTGGTGGAGCAGGTGATGGAGGCGATGAGGCGTGTCGGGAGGAGGTG  
CTGGATTCGGGTGGTTTGAGGACTCCGGTGGGTGGGGGTGTGAGGGACCTCGATCTCTAC  
GCTTCGCGAGAACACCGAGGTCGTTCTGGCGTCGTCGAGAGCCTCGAGGTTATGTCCAA  
GTAATATGCCTTCGAGCAGTTATTAGAGTACTCCCCCTTTTGTAAATAAAATAAACTTC  
ATTTTCTATTGCTATTTTTTACCTGGGTGGAATCCTCACCTGTAATAATTCGGCTTAA  
TTTTCATGTAATTATGTTTGCTCAACCAAAGAAAAAAAAAAAAAAAAAAAAAAAAAAAAAA  
AA

>**Gsoja\_MSTRG.52475.32** GeneID=Gsoja\_MSTRG.52475;Strand=-;Pos=Chr11:45344777-  
45344898,45345421-45345542,

AGGTGTCTTTGGTGGTGTGAAACATAGGGAGGTTGGTTATGAGGGGAAGGAGCATTTGG  
AGGACTATAAGCAGGAGATGGTGTGTTTTGGAGGAGTAGGAACATTTGGTGGAGTGTAAT

AGGTGAAGGTGTTTTGGGAGGAGTGGGAACATTAGGAGGATTATAAGAAGGAGAAGGTGT  
TTTTGGAGGTGTAGGAACATAGGGTGGATTGTTACTAGGGGAAGGAGCTTTTGGGGGAGT  
GTAC

>**Gsoja\_MSTRG.52475.27** GeneID=Gsoja\_MSTRG.52475;Strand=-;Pos=Chr11:45344745-  
45344832,45345007-45345072,45345247-45345276,45345355-45345366,45345463-  
45345591,45345635-45345792,45345841-45345929,

AGGGATGGTGGATGGATAGGGCGATGATGGGTAGGGTGGTTGAGATGTTGGGGAAGGAGT  
GTTTGGAGGTGTTGGATTAATGTAAGGTGGTTGGGAAGTGGGTGAAGGAGTGGTGTTTGG  
AGGTGTGGGAATGTAAGGTGGTTGAGATGTTGGAGATGGGGTTATTGGAACAAAGGGTGG  
TTGATGGGCAGGGGAAGGCGTTTTTGGAGGGGTGGAGTGTAGGGAGGTTGAGAAATAGG  
AGAAGGAGTGTTTTTGGAGTAGTAGTGGGAACATTTGGAGGACTATAAATTGGAGAAGGT  
GTCTTTGGTGGTGTGAAACATAGGGAGGTTGGTTATGAGGGGAAGGAGCATTGAGGA  
CTATAAGCAGGAGATGGTGTTTTTGGAGGAGTAGGAACATTTGGTGGAGTGAAATAGGT  
GAAGGTGTTTTGGGAGGAGTGGGAACATTAGGAGGATTATAAGAAGGAGAAGGTGTTTTT  
GGAGGTGTAGGAACATAGGGTGGATTGTTACTAGGGGAAGGAGCTTTTGGGGGAGTGTAC  
ACAGGAGAGGGTATTTTTGGAGGCGTTGGAAA

>**Gsoja\_MSTRG.417.1** GeneID=Gsoja\_MSTRG.417;Strand=-;Pos=Chr01:2599678-2599687,2612473-  
2612895,2696306-2696317,

AGAAGAAGAAGAAAAAAGAAACCGCTACTCAACATGACCAGAGGATGAAATAAATCAAA  
TAGATCCCGTCCGTCCGTGTGCGGAAAAGAAAGATCAAGGGCGGAAATGCCACCACGTGG  
GACGAATCAAAGACAATTGTTCTCATGAAAGATCTTAAGCCACCAAGGCCATGGCTACGA  
AGGTTCCAGCGAGTGCAGAGGTAGCAATGAAGGCCTTGCTGACGGAGAATGCAGCGGAGG  
GCGGTGGAGGCTCGGCGCCACCGGAGGGTCCGGGTGAGGGTCCGGGTGGAGTGTTAGGAG  
AGGTGGGGCTTGGTGTCACTGTAGGAGAAGGTGAAGGAGGAGAGGCTGCAGGAGAGGAAG  
CAGGTGTAGGTGCAGCCGTTGGTGGTGGTGGTGGTGGTGGTGGTGGTGGTGGTGGTGGT  
GAGTTGCTGCTGGTGTGTTGTTGTTG

>**Gsoja\_MSTRG.52475.24** GeneID=Gsoja\_MSTRG.52475;Strand=-;Pos=Chr11:45344744-  
45344832,45345007-45345072,45345247-45345354,45345529-45346458,

TGATAATTATTACAACTCACATTGGTAACCATAGATACACAGATTATACGACATAAAATT

AATTATGAGACGCGATCTCATTTGTCCAAGTAAAAATATTAGAAAAATATATAAAAGTG  
TTCACAATTACTATATACTATAACTCAAGTTCCAAAGAAAGTTTGATTTTTCTAATCAAT  
AGTGGTACTTAGAGCAGCACCGACCAGAACTATAACTCAAGTTCCAAAAAAAGTTTGAT  
TTTTCTAACCAAGAGTGGTGCTTAGAGCAGCACCGACCAGAATGGTTAGTGAATACACTC  
CAAACCGCGACGGCGTTATAGACGACGCACCGTTTAGTCTGGCTGGCGTCGTTTCGTTCCG  
ACGACGACGGCGTTTGAGATGATCCCGACGACGACGACGGCGAGGGGGTTGTTGCCGCCG  
CAGACGGTAATGGCGGCGATGTTGCCGGGGTGAGGGAGGAAGAGGGTGGGTAAGTGGGTG  
GTGCAGTTGAAGCAGAAGGTGGGTAAGATGGAGAGAGTGAGGTTGAGGGAGGGATGGTGG  
ATGGATAGGGCGATGATGGGTAGGGTGGTTGAGATGTTGGGGAAGGAGTGTGGAGGTG  
TTGGATTAATGTAAGGTGGTTGAGATGTTGGGGAATGAGAGTTTGGAGGTGCTGCAATGG  
AAGGAGGTGGGAAGTGGGTGAAGGAGTGGTGTTGGAGGTGTGGGAATGTAAGGTGGTT  
GAGATGTTGGAGATGGGGTTATTGGAACAAAGGGTGGTTGATGGGCAGGGGAAGGCGTTT  
TTGGAGGGGTGGAGTGTAGGGAGGTTGAGAAATAGGAGAAGGAGTGTGGAGGGAGTTG  
GGACATAAGGTTGGTTGCCAGGGGGAGGTGTTTTGGAGTAGTAGTGGGAACATTTGGAG  
GACTATAAATTGGAGAAGGTGTCTTTGGTGGTGTAGGAACATAGGGAGGTTGGTTATGAG  
GGGAAGGAGCATTTGGAGGACTATAAGCAGGAGATGGTGTTTTGGAGGAGTAGGAACAT  
TTGGTGGAGTGTAATAGGTGAAGGTGTTTTGGGAGGAGTGGGAACATTAGGAGGATTAT  
AAGAAGGAGAAGGTGTTTTGGAGGTGTAGGAACATAGGGTGGATTGTTACTAGGGGAAG  
GAGCTTTTGGGGGAGTGACACAGGAGAGGGTATTTTTGGAGGCGTTGGAAAA

>**Gsoja\_MSTRG.61707.53** GenelD=Gsoja\_MSTRG.61707;Strand=+;Pos=Chr14:2477112-  
2477356,2477681-2477912,

ATTTGTTTCATTAATTATTATTTGCAACATCAAATGTTTGTTTCACATATATTAGACAAG  
TTTTTTTTTTGGAATAAAGCAACTTCAAAGCACCCATCATTTTTATTATACTATTTCTTC  
CTTGCCTTAATCATGAGCTTAATAAAGTTTTCATCCTGAAGTTGTAATTGGTGCTCTTG  
GTGGCCCTGAAATTGTAATCGGTGCCCTTGCGACCCCTGCCTTTGGTGGCCCCGAAGTTG  
TAATCAGTACCCTTGGGGGCCCTTCCTTTGGTGGCCCCGAAGTTGAAATTGGTGCTCTTG  
GTGGCCCTGCCTTTGGTGGTCCTGAAGGTGTAAGTGGTGGCTCTGGTTCTGAAGCTGTAA  
CTGTGAGAACAAATACAACCTAGTAGATGAAAAATTGCAACAAACACTTTCTTCATTTTGT  
AAAACGAATTTCTATCTCAATAAACTTTTTAGGATACACTTGTATTTTGATGGGAAT

>**Gsoja\_MSTRG.5530.1** GeneID=Gsoja\_MSTRG.5530;Strand=+;Pos=Chr02:7820058-7820304,  
GTGACATCAGCAAAGGAAGTAGCCAATGCAACCCCTGCAAGGGAGAGTTCACCAAGATGA  
CCAGCCATCATCAATGACACCACTTGCAGCAAAAAGTGTGACACTGAGACCACCACCATT  
GGTGCTGCCATCAAAGTACATTCTTCAACTCTTGGACAAAGCCACTACTACTCTTTGAG  
TTTGTTAAGGTCACCTCTTGTTTTCTTTGGCAACAATGTCTCCTCCATTTCTTTCTTT  
CTTTCTT

>**Gsoja\_MSTRG.61707.51** GeneID=Gsoja\_MSTRG.61707;Strand=+;Pos=Chr14:2477094-  
2477299,2477345-2477438,2477763-2477912,  
TTGGACAAGAACACCTAAATTTGTTTCATTAATTATTATTTGCAACATCAAATGTTTGTT  
TCACATATATTAGACAAGTTTTTTTTTTGGAATAAAGCAACTTCAAAGCACCCATCATTT  
TTATTATACTATTTCTTCCTTTGCCTTAATCATGAGCTTAATAAAGTTTTCATCCTGAAG  
TTGTAATTGGTGCTCTTGGTGGCCCTGAAGTTGTAATCGGTGCCCTTGGTGGCCCTGCCT  
TTGGTGGTCCCGAAGTTGTAATTGGTGCTCTTGGTTGCCCTGCCTTTGGTGGTCTGAAG  
GTGTAAGTGGTGGCTCTGGTTCTGAAGCTGTAAGTGTGAGAACAATACTAGTAGAT  
GAAAAATTGCAACAACACTTTCTTCATTTGTAAACGAATTTCTATCTCAATAAACTT  
TTAGGATACACTTGTATTTTGATGGGAAT

>**Gsoja\_MSTRG.28718.1** GeneID=Gsoja\_MSTRG.28718;Strand=-;Pos=Chr07:9580303-9580542,  
TTGAAATGCTGTTTGGATTGAATCTATAAAGGTAGAGCTAGCAACAAGTGGCATCATGGA  
AGTCACATATTTGACCACTTCATGTACATTGGTAAAAACACGGCCCCAACTCTCCATAA  
TATCATAAGGGAAGCAAATTCTAAAATCCCCACTGCAGAGGCCAAGAACATGGTGACTTT  
AACTGCTAAATATGCAGCTTTTGGACTACCAGCCCCTAATTCATTTGAGATCCTTGACT

>**Gsoja\_MSTRG.9427.1** GeneID=Gsoja\_MSTRG.9427;Strand=+;Pos=Chr03:462346-463548,  
TGTTAATACTGTAAATAATAAAATTTAATCTCAATATGCCAAGAGAGAAGAGCATACTTT  
AAGTCTGGCCAATAAAATCAACAACATAAAATAGAACTCAACATAGATATGCTATAGTG  
CAAAGGATTACCATATGGATAGAGCATCAATTTGAACCTCAGCGTTTTTCATATTACCAG  
TCAAAAGAATCAATATTGTGTTGTACCAGAGCTCAAGACTGTAAAATATACAACAACCTC  
CAAGTTAGGATGCATCTAACTTTAGTAATCCATTCCTAATTTCCATACAAATTAAGGAA  
ATCCAAATTTATTTACAATCATGGCATTCTAAGGACCTTAACCCCTTTAGTTGATTGA  
GAACAAAGCTCACCATAACATGGCACCAGCTGAAAGGGAAAGCTTGACAACAGGCCAAAG

ATCTTTGAATGCTAAAGAAGAGAAACCTTTCCATGTTTCAGGGCACCAACCGCATGTAAT  
AAATATTAGTTGACCAACATTGGGAATCCAATATGCCAAAATTGTTGAAATCATTGCACC  
AGGAATCCCATACTTGAATTGTATTGTGAATAGCCAAGAGAGGGACACATGAATGATTAT  
TGATAATGTTGCCAAGAATGCAATTATGACATTCTTGCTTTGAGATTGAAGGAATGTCTG  
ACAGTTGAATGACACAATATAAGCAAATAAGATTGGAATTGACCAAAGAGAAACGTTTCT  
TGCCACTCGTGCTATGCTCTCATCTTGGCCTAAGAGAGTCAAAATTGGGCTTGTGAAGAT  
GAACAACGGAAGAAGGCAGAGTGCAGTTAAGAATAAACTATCGATGATCTTTGAAGATA  
CACTCCCATCATGTCATATTCTTTTGACCGTATGCTTGTCCGCAAAGTGTGACAACGC  
ACTTGACATTCTAACTACAATCGCCAGTTCACACCCACAAATAATTTGTGTTATTCCTT  
GCCTATACTTCTCCACTGAATAAATAGTATTGTTGGCCAATAGCCATATGAAGTTGAATT  
ATATATACATATAACATGATGAAAGCTGCACTGATCAACAACAATGTAATTTTGAATAT  
GTTTTTGGCTCATCTTTCTTTTAGAATTTGCAAAGTTCGGATCTTGTTCCAGCAAAAATT  
TTATCCATCTTCAACCCTAAATAAATTATAATGTATCATTTTATGATCCGTAGCTAAGGT  
TCT

>**Gsoja\_MSTRG.46128.1** GeneID=Gsoja\_MSTRG.46128;Strand=+;Pos=Chr10:48333319-48334810,

CTTCCCTATACAGCTAAAGACAAATTCCTGATAGATTCTCTCTCTCCCTTTGTCTTCTT  
TGATTTTTCCCTTTTGGTTTTTGTTCCTGTCCAAAAAACCGAGATTACTAAAAGTTAA  
ACCCACGATTGTTTATCTTCTTCTGAATCAGCTAATGATAATAAAGAATCTTCCTTGATT  
TCAGCTTTGGGTGGCTTCTCTGCACCAACCTCCTTGCTGTCATCAACAGCAACAACAACA  
CTGGTTAGTTTCTTTGCCCTTAGAGCCTCAACATCCCAATCCGTTTGACTCATAACCACC  
AACATGGTCACTGCACAAGACCCCTGAGCCGCAAGTAACCCAAGCCACAACCCTTGAAAA  
TCAAGCCCTGCGAAGAAACCAAGCCAAACCGCCACAGGCATTCCAACAAGGTAGAAACAA  
CCTAAGTTAATGTTAGCACCAACTTTAGGCCTTGCTGTGCCTCTTAGCACTCCGCACCCC  
GTTGTTTGAGGACAGTTTCCGAGTTCGCAGAGTCTATAATCGGTAACACCAATGAGGTC  
AAGGTTATTATTTCTTGTCTTGTGTGAACATGCTGGCCCAAATGTTCTAACCAGAATG  
GTGAAAACAAAAGCTAAAAAACCTAACATGAAGCTGCAAGAGAGGCCAACTATGGCAGAA  
AGTTTAGCCTTTGAGGGCTTTTGAGCACCTAATTTGTTACCAACTCTTGTGGACACGCTG  
AAGCTTATTGACGATGGGAGAATGTAGAGCAGAGAAGTGGTTTGGATCAAAATCCCCATG  
GAAGCCACGGTTGCTCTAGGATTCACCAACAACCCGCATAACAAAATCATGATCTCATAC  
CACCACCATTCTAGGCACACGGAAATGCAGCTTGGGATAGCCAAGTCGAGGAGCGATTTC

CATTGCGTGAAACACTCAAAAGAAAAACCTCCCCATGTTTTCTTATGCGTACCAGAGAAG  
ACTATGTAAAGAATCAAAGAAGCTATGAGGTTGAAGTTAGTCCAAACCCCGCTGAGAGCC  
ACGCCTTTGATTCCCCAATTGAGGTGGGAAACAAGAAGGTAGTTAATGGGGATGTGAAGG  
AGAATTGAGAAAGTGGCGCAGAGAGTGAGAGGCAGAGTAATGGATTGGCTTCGAAGGTAA  
ATTCTTAAAGGGTGTAAGAAAGATTGTGCTAAGAGGTCAGGGATGGAATAAAGAAGATAT  
GATTGGGCTTGTGTGGCTATGGCCTCGTCCTGGCCACATAAAGAAGGATATGCTTCATG  
TAGAGCCAAAGGAGAGAGATTGGAATGGAAGTGAAGAGGAGCAAAGAATGGTTCTTTGT  
AAGCAGAGGCCGAGGAGGGTGAACTTTTTGGCACCGTAGGCTTGTCCGCAAAGGGTTCC  
ATTCCGACAGCGAGGCCGAGAGGATCGAGTAACCGGTGATGTTGGCGAAGCCGACGGCG  
AGTGAGCCGCCGGCTAAGGCCAGCTCGCCGAGGCGGCCGAGGAAGAGCATGG

>**Gsoja\_MSTRG.52475.3** GeneID=Gsoja\_MSTRG.52475;Strand=-;Pos=Chr11:45317721-  
45317734,45344717-45344832,45345007-45345102,45345355-45345366,45345463-  
45345558,45345862-45345986,

AGTGGGTGGTGCAGTTGAAGCAGAAGGTGGGTAAGATGGAGAGAGTGAGGTTGAGGGAGG  
GATGGTGGATGGATAGGGCGATGATGGGTAGGGTGGTTGAGATGTTGGGGAAGGAGTGTT  
TGGAGGACTATAAATTGGAGAAGGTGTCTTTGGTGGTGTGAAACATAGGGAGGTTGGTT  
ATGAGGGGAAGGAGCATTGGAGGACTATAAGCAGGAGATGGTGTGTTTTGGAGGAGTAGG  
AACATTTGGTGGAGTGTAATAGGTGAAGGTGTTTTGGGAGGAGTGGAACATTAGGAGG  
ATTATAAGAAGGAGAAGGTGTTTTTGGAGGTGTAGGAACATAGGGTGGATTGTTACTAGG  
GGAAGGAGCTTTTGGGGGAGTGACACAGGAGAGGGTATTTTTGGAGGCGTTGGAAAATT  
AGGAGGAGTATAAACTGGGGAAGGAGTTCTTGGAGGTGT

>**Gsoja\_MSTRG.52475.4** GeneID=Gsoja\_MSTRG.52475;Strand=-;Pos=Chr11:45344082-  
45345006,45345355-45346448,

TACAACACATTGGTAACCATAGATACACAGATTATACGACATAAAATTAATTATGAGA  
CGCGATCTCATTTGTCCAAGTAAAAATATTAGAAAAATATATAAAAGTGTTACAATTA  
CTATATACTATAACTCAAGTTCCAAAGAAAGTTTGATTTTTCTAATCAATAGTGGTACTT  
AGAGCAGCACCGACCAGAACTATAACTCAAGTTCCAAAAAAAGTTTGATTTTTCTAACC  
AAGAGTGGTGCTTAGAGCAGCACCGACCAGAATGGTTAGTGAATACACTCCAAACCGCGA  
CGGCGTTATAGACGACGACCGTTTAGTCTGGCTGGCGTCGTTTCGTTGACGACGACGG  
CGTTTGAGATGATCCCGACGACGACGACGGCGAGGGGTTGTTGCCGCCGACGACGGTAA



TGGCGGCGATGTTGCCGGGGTGAGGGAGGAAGAGGGTGGGTAAGTGGGTGGTGCAGTTGA  
AGCAGAAGGTGGGTAAGATGGAGAGAGTGAGGTTGAGGGAGGGATGGTGGATGGATAGGG  
CGATGATGGGTAGGGTGGTTGAGATGTTGGGGAAGGAGTGTGGAGGTGTTGGATTAAT  
GTAAGGTGGTTGAGATGTTGGGGAATGAGAGTTTGGAGGTGCTGCAATGGAAGGAGGTTG  
GGAAGTGGGTGAAGGAGTGGTGTGGAGGTGTGGGAATGTAAGGTGGTTGAGATGTTGG  
AGATGGGGTTATTGGAACAAAGGGTGGTTGATGGGCAGGGGAAGGCGTTTTTGGAGGGGT  
TGGAGTGTAGGGAGGTTGAGAAATAGGAGAAGGAGTGTGGAGGGAGTTGGGACATAAGG  
TTGGTTGCCAGGGGGAGGTGTTTTTGGAGTAGTAGTGGGAACATTTGGAGGACTATAAAT  
TGGAGAAGGTGTCTTTGGTGGTGTGAAACATAGGGAGGTTGGTTATGAGGGGAAGGAGC  
ATTTGGAGGACTATAAGCAGGAGATGGTGTGTGGAGGAGTAGGAACATTTGGTGGAGT  
GTAAATAGGTGAAGGTGTTTTGGGAGGAGTGGGAACATTAGGAGGATTATAAGAAGGAGA  
AGGTGTTTTTGGAGGTGTAGGAACATAGGGAGGTTGGTTATGAGGGGAAGGAGCATTGG  
AGGACTATAAGCAGGAGATGGTGTGTGGAGGAGTAGGAACATTTGGTGGAGTGTAAT  
AGGTGAAGGTGTTTTGGGAGGAGTGGGAACATTAGGAGGATTATAAGAAGGAGAAGGTGT  
TTTTGGAGGTGTAGGAACATAGGGTGGATTGTTACTAGGGGAAGGAGCTTTGGGGGAGT  
GTACACAGGAGAGGGTATTTTTGGAGGCGTTGGAAAATTAGGAGGAGTATAAACTGGGGA  
AGGAGTTTGTGGAGGAGTTGGAATATATGGAGGATGATTAGCAGGTGAAGGTGCTTGAGT  
GGGAACATTGGGAGGAGTGTATACAGGGGAAGGAGTTTTTGGAGGTGTTGGAACATTAGG  
TGGATAATGAATAGGTGAAGGTGGTTTTGGATGAACATAGGGAGGGCTGGAAATAGGTGA  
AGGTGTTTTAGGAGGAGGTATTGGAACATAGGGTGGATGATAAGGAGTTTCTGGAGGAGT  
TGGAACAGTTGGAGTTTGAGGAGGTGCTGGAACATAAGGTGCTCTCGGAGGAGTAATTGG  
AACATAAGGAGTGTTTGGAGGGGTGGAACATAAGGTGGATTTGGATGATAAGGTGCTTT  
TGGAGGAGTAATTGGAACGTAAGGAGTGTTTGGAGGTGTCGGAGAATAATAAGGAGGTGG  
CTCTCTCACAGCCAACACCACAATAATCAATTTCTGACCCTTCTCACAATTATCATCTTT  
CCCACTAATGAAGTAAAATGGACCCGATCTATCAAAGTGAAGTCCGAGTCACCATCCTC  
AAACTTCTTGATCGGGTCTTCTTGTTACATTTCTCATAATCATCATTGTTCAACACCAA  
CACAGTATCTGAGTCCTTCTTGTACTTAAAACTATCAA

>**Gsoja\_MSTRG.66725.1** GeneID=Gsoja\_MSTRG.66725;Strand=+;Pos=Chr15:8373481-8373749,

CAGATAACACCGGTTGGATTCCATTAAGAATGAGAGTGACGGCCAAGTAGGGACAGAGGT  
CTGAGACCGCATTAGCGACGGTTTCACCATCTGTGAATGCATAGCTTACAACCCGACGCA

GTGCAAGGACCACCACTGCTTCTATCACCGCAATTATGAAAGATATCATATTTCACTACAA  
TCACTGAGAATGCTGCAGACTTTGGATGCTCAGCTCCCAACTCGTTACTCACCTCACGC  
TGCACTAATTATCAGTTTACAACATCAC

>**Gsoja\_MSTRG.39209.1** GeneID=Gsoja\_MSTRG.39209;Strand=-;Pos=Chr09:18275716-18275973,  
AAGAAGGGAAGATGTGAGCCACACTTGCAAGCAGGTTTGAATGCAGCCATAGGAATTGG  
ACCAAACCTTGCTGCCAATGAGGCTGCCAAGGTCTGGCAGAATGTAACAGCTATTACTCT  
TGCCAACAACAGACCTCCTATTGAAAATGAAAATAAATTTGAACATGAGTAAATTCTAGC  
TTGATAAGTGATGAACATATATTTAATTTTTCTTTTTTGGTAAAGACAACAAATATTATG  
TATCAGAGACAATTCTGC

>**Gsoja\_MSTRG.31243.1** GeneID=Gsoja\_MSTRG.31243;Strand=-;Pos=Chr07:44700847-44701086,  
TGACAATCTTGCCCTTTCACCTTGCCCCGCTCCAAGTTCATTGCCTACTCTGGTTGACAC  
CGATGCACTTAATGCCGTTGGCAAAGTGTACATAAGAGACGTGGTTTGTATCACTATGCC  
AGCAGTGGCTAGAGAAACACGAGGGTTATGAAGGTAACCTGCTGAAATTGTCATCAACTC  
GTACCACCACCATTTCCAAGCAAACAGCTAGACAACCTTTGTATCGAAAATTTCAATAGCAC

>**Gsoja\_MSTRG.52475.10** GeneID=Gsoja\_MSTRG.52475;Strand=-;Pos=Chr11:45344091-  
45344898,45345073-45345192,45345463-45346448,  
TACAACTCACATTGGTAACCATAGATACACAGATTATACGACATAAAATTAATTATGAGA  
CGCGATCTCATTTGTCCAAGTAAAAATATTAGAAAAAATATATAAAAGTGTTTACAATTA  
CTATATACTATAACTCAAGTTCCAAAGAAAGTTTGATTTTTCTAATCAATAGTGGTACTT  
AGAGCAGCACCGACCAGAACTATAACTCAAGTTCCAAAAAAAGTTTGATTTTTCTAACC  
AAGAGTGGTGCTTAGAGCAGCACCGACCAGAATGGTTAGTGAATACACTCCAAACCGCGA  
CGGCGTTATAGACGACGACCGTTTAGTCTGGCTGGCGTCGTTTCGTTGACGACGACGG  
CGTTTGAGATGATCCCGACGACGACGACGGCGAGGGGTTGTTGCCGCCGACGACGGTAA  
TGGCGGCGATGTTGCCGGGGTGAGGGAGGAAGAGGGTGGGTAAGTGGGTGGTGCAGTTGA  
AGCAGAAGGTGGGTAAAGATGGAGAGAGTGAGGTTGAGGGAGGGATGGTGGATGGATAGGG  
CGATGATGGGTAGGGTGGTTGAGATGTTGGGGAAGGAGTGTGGAGGTGTTGGATTAAT  
GTAAGGTGGTTGAGATGTTGGGGAATGAGAGTTTGGAGGTGCTGCAATGGAAGGAGGTTG  
GGAAGTGGGTGAAGGAGTGGTGTGGAGGTGTGGGAATGTAAGGTGGTTGAGATGTTGG

AGATGGGGTTATTGGAACAAAGGGTGGTTGATGGGCAGGGGAAGGCGTTTTTGGAGGGGT  
TGGAGTGTAGGGAGGTTGAGAAATAGGAGAAGGAGTGTGTTGAGGGAGTTGGGACATAAGG  
TTGGTTGCCAGGGGGAGGTGTTTTTGGAGTAGTAGTGGGAACATTTGGAGGACTATAAAT  
TGGAGAAGGTGTCTTTGGTGGTGTGAAACATAGGGAGGTTGGTTATGAGGGGAAGGAGC  
ATTTGGAGGACTATAAGCAGGAGATGGTGTCTTTGGTGGTGTAGGAACATAGGGAGGTTG  
GTTATGAGGGGAAGGAGCATTGAGGACTATAAGCAGGAGATGGTGTGTTTTGGAGGAGT  
AGGAACATTTGGTGGAGTGTAATAGGTGAAGGTGTTTTGGGAGGAGTGGGAACATTAGG  
AGGATTATAAGAAGGAGAAGGTGTTTTTGGAGGTGTAGGAACATAGGGTGGATTGTTACT  
AGGGGAAGGAGCTTTGGGGGAGTGACACAGGAGAGGGTATTTTTGGAGGCGTTGGAAA  
ATTAGGAGGAGTATAAACTGGGAAGGAGTTTGTGGAGGAGTTGGAATATATGGAGGATG  
ATTAGCAGGTGAAGGTGCTTGAGTGGGAACATTGGGAGGAGTGATACAGGGGAAGGAGT  
TTTTGGAGGTGTTGGAACATTAGGTGGATAATGAATAGGTGAAGGTGGTTTTGGATGAAC  
ATAGGGAGGGCTGGAAATAGGTGAAGGTGTTTTAGGAGGAGGTATTGGAACATAGGGTGG  
ATGATAAGGAGTTTCTGGAGGAGTTGGAACAGTTGGAGTTTGAGGAGGTGCTGGAACATA  
AGGTGCTCTCGGAGGAGTAATTGGAACATAAGGAGTGTGTTGGAGGGGTGGAACATAAGG  
TGGATTTGGATGATAAGGTGCTTTTGGAGGAGTAATTGGAACGTAAGGAGTGTGTTGGAGG  
TGTCGGAGAATAATAAGGAGGTGGCTCTCTCACAGCCAACACCACAATAATCAATTTCTG  
ACCTTCTCACAATTATCATCTTTCCCACTAATGAAGTAAAATGGACCCGATCTATCAAA  
CTGAAACTCCGAGTCACCATCCTCAAACCTTCTTGATCGGGTTCTTCTTGTTACATTTCTC  
ATAATCATCATTGTTACACCAACACAGTATCTGAGTCCTTCTTGACTTAAA

>**Gsoja\_MSTRG.26928.1** GeneID=Gsoja\_MSTRG.26928;Strand=+;Pos=Chr06:48014148-48014350,  
GTTTCTCCAGTTGGTAAGAGCAGTAACAAGGGAAAGGAGAATCGATTGGACAATGGAGC  
CAGTGAATATTCCAATCCAGAGGCCCTTTGCTCTTAAATGTGCAACAAAGCCAAGTACGA  
TACCTACAGGAATTCCTACCAGATAAAATGCTCCCAGATTGACATAGGCTCCTAGATGTT  
GCCACCCACTTCCTCTAGCAACC

>**Gsoja\_MSTRG.28714.1** GeneID=Gsoja\_MSTRG.28714;Strand=-;Pos=Chr07:9568723-9570163,  
AACAAAATGTTATGAGTAGAGGGGATAGTGTGCCTTAGTTCGAGGCAAGGCTCCTCCTAA  
AAGAGAAATGGAATTCTGGAAATAAGCTTTTGCATGGTTTATTCATTATGCATGCAGCCT  
TTATATACTGCAGCTTTCTTTACACGTATAACCAACCTAATGAACAGGATTAACAACTC

TATCAACCTGCAACTGAATTAACAACTACACGTAACCTGACACGTGGGTTATTATA  
CTTGGCTATAGCGTTTTCTTCTTACTAACATTTCTTAGCCCATCAAAAACACCTTGCCT  
CAAGGTGTTGGGTGCAGAAAAAAGAACATGAGTAAACAGAAGCTCAGCCTGTGCCAG  
CCATGGTTGTGGTTGAGGCGGTGGCTTCGGTGGATGTGGTGGCGGGTGTGGTGGCGAACG  
TTGTCGCCGATGACAGACAGAGCAAATCCAAGTCTTGACGACGAAAAAATCCAAACCAA  
GCGCAGATGAATCTGATGCTTGATGGCATCATCGCCGAGCAAATTGGTGTCTATTGCCATA  
AGGGATTTGCGGCAATGGTCGTGGCGGTAAAGACAGTGGGCAGTGCGGAGTGATAGGGG  
CAACGAACGACTAAGCTGGAAGTGGTGGTTGGTCGTATGAAAGTGGGGAAGCGGCAGCGG  
AGCCATGGGTGCGACTGTTTTGAGTGTGGGATGGTGGGAAACAGCCAAGGGAGGCGGAAT  
TGACGTGGGTGCTGCTGTAGGTGGTGGTTGTGCGGAGGAGGACGAAGCTGATGTGGGTGC  
TGCTGTAGGTGGTGGTTGTGCGGAAGAGGACGGAGCTGATGTGGGTGTTGTTGTTGTTGG  
CGTTATAGGATCCATGGAAGGTGGCATGGTTTGCAGAGTGGTGGTACTAAACAAGCTGAA  
CATACGGTGTGGGTACTCGCAAATCAATAGCTAGCGGCGGCAGTGGTGGCTGCACCGA  
AGAAGGAAGCCATGGCATCCGGGTATCGCACAAGGCTAGTAAGCGGATCCGAGTACTCTC  
AAAATCAATCCCAAGGGATTGAGCTGGATGTATATAAGGAGAAGGTGGGAACTGAGACGG  
AAGGGATGACTCCTACAGAGGGTGGTGTGTTATGGCATAGCCGAGTAGGGGTAGAGGCA  
GCCATGGAAGACAGTCATGGATGACAGGTGCGACCAATTGTTATGAGTAGAGGGGATAAT  
GTGCCTTAGTTGAGACAAGGCTCCTCCTAAAAGAGAAAATGGAATTCTGGAAATAAGCTT  
TTGCATGGTTTATTATTATGCATTCAGCCTTTATATACTGCAGCTTTCTTTACACGTAT  
AACCAACCTAACTAACAGGATTAACAACTCTAACAACTGCAACTGAATTAACAACTA  
CACGTAACCTAATCTGCACGTGGGTTATTATACTTGGCTATAGCGTTTTCTTCTCCTAAC  
A

>**Gsoja\_MSTRG.39208.1** GeneID=Gsoja\_MSTRG.39208;Strand=-;Pos=Chr09:18274868-18275081,  
CTTTTAATTTATGCATTTTCATTCTTTCACACATTCTCTAAAGGCTTCATTTCAAAGAA  
AATATGGATCATTTGAACCTACGAATAACATATAAAGGAGTTGTAGTGCCTTGAATCCT  
CGAAAGATTCTTGCATGGCCAAGGACAAAAGCACTGCTGGAGCACCTAATGATCTCAAT  
CTCAAGTATTTAATAGCAGGGTTTAGCATAGGAG

>**Gsoja\_MSTRG.77248.1** GeneID=Gsoja\_MSTRG.77248;Strand=+;Pos=Chr17:40638590-40638935,  
CATAACATAACAGCTGAAGCCAAAGAAAGCTTTACAAAACCAAACAAGTCCGAAAATGCT

AGCCATGTAAATCCACTCCATGCTCCATCTGACTTAGTGATGAAAATGTACAACAATTGT  
GCAATCACAATCACCCACCATGATGTATTGAGAGTAACTGCTGCTCCAATTAGGCCCCAT  
CCAAGCTTAAATATAACAAGCCAACTAAAAAATGTGTGCAGCACCAAACAACACTACTGAT  
ATCCATAACATCACCAGCACTTTCCTCTGTGCCTGTAGGAACCTTACTATTGGAAAGTTT  
ATAGCGTATGCAAACAACAGGATATCATCCACACAGCAAACCTTC

>**Gsoja\_MSTRG.15163.1** GeneID=Gsoja\_MSTRG.15163;Strand=-;Pos=Chr04:8781426-8781677,  
GACATAAAAACATGAGAAAAGGCATCCTAATCTTTTCCCCTCATCATCACTCTATAC  
ATAGATTGTCCCTCTGTTCAAGCTCAACTTCACTATTATCAGTGATTGAAGACGACTCAT  
CCAATTTACATACTTCACAAGCTTATGAATTCATCATATCTTTTCCACATTATCTATA  
AGTTCCTCTTTCAAACCCATTCCGAAACACACCAGTATAGTAGACGCGGAGTTTTATTG  
AGCAACTGCGTC

>**Gsoja\_MSTRG.52475.20** GeneID=Gsoja\_MSTRG.52475;Strand=-;Pos=Chr11:45344685-  
45344988,45345262-45345642,45345781-45345909,  
GCGATGATGGGTAGGGTGGTTGAGATGTTGGGGAAGGAGTGTTTGGAGGTGTTGGATTAA  
TGTAAGGTGGTTGAGATGTTGGGGAATGAGAGTTTGGAGGTGCTGCAATGGAAGGAGGTT  
GGGAAGTGGGAGAAGGAGTGTTTGAGGGAGTTGGGACATAAGGTTGGTTGCCAGGGGGAG  
GTGTTTTTGGAGTAGTAGTGGGAACATTTGGAGGACTATAAATTGGAGAAGGTGTCTTTG  
GTGGTGTTGAAACATAGGGAGGTTGGTTATGAGGGGAAGGAGCATTTGGAGGACTATAAG  
CAGGAGATGGTGTTTTTGGAGGAGTAGGAACATTTGGTGGAGTGTAATAGGTGAAGGTG  
TTTTGGGAGGAGTGGGAACATTAGGAGGATTATAAGAAGGAGAAGGTGTTTTTGGAGGTG  
TAGGAACATAGGGAGGTTGGTTATGAGGGGAAGGAGCATTTGGAGGACTATAAGCAGGAG  
ATGGTGTTTTTGGAGGAGTAGGAACATTTGGTTGGTTATGAGGGGAAGGAGCATTTGGAG  
GACTATAAGCAGGAGATGGTGTTTTTGGAGGAGTAGGAACATTTGGTGGAGTGTAATAG  
GTGAAGGTGTTTTGGGAGGAGTGGGAACATTAGGAGGATTATAAGAAGGAGAAGGTGTTT  
TTGGAGGTGTAGGAACATAGGGTGGATTGTTACTAGGGGAAGGAGCTTTTGGGGGAGTGT  
ACACAGGAGAGGGTATTTTTGGAGGCGTTGGAAAATTAGGAGGAGTATAAACTGGGGAAG  
GAGTTTGTGGAGGAGTTGGAATATATGGAGGATG

>**Gsoja\_MSTRG.65596.1** GeneID=Gsoja\_MSTRG.65596;Strand=-;Pos=Chr15:2791444-2791644,

GTGTGGTAATAACTCTTTGGTTTCAGCATCCTTAGGTGGACCTGTTTCCAAGCATCTACC  
CTCCTCTATATGAGGGTTTTCTCCACTAAGGGTATCTTCCTCAGCCACAAAAGAGGTTGT  
GACACTGACAAGCGGGAATATTGCGATCCTTGATACTTGATTGAAGAGAGCTATGGAAAC  
TCCTACAGCAGCAAGCTCTAC

>**Gsoja\_MSTRG.61707.54** GenelD=Gsoja\_MSTRG.61707;Strand=+;Pos=Chr14:2477194-  
2477299,2477345-2477548,2477711-2477905,

CTTCAAAGCACCCATCATTTTTATTATACTATTTCTTCCTTGCCTTAATCATGAGCTTA  
ATAAAGTTTTCATCCTGAAGTTGTAATTGGTGCTCTTGGTGGCCCTGAAGTTGTAATCGG  
TGCCCTTGGTGGCCCTGCCTTTGGTGGTCCCGAAGTTGTAATTGGTGCTCTTGGTTGCC  
TGCTTTGGTGGTCTGAAGGTGTAAGTGGTGGCTTTGGTTCTGAAGCTGTAAGTGGTG  
CCTTGGTGGCCCTGCCTTTGGTGGCCCTGAAGTTGTAATCGGTACCTTGGGGGCCCTTC  
CTTTGGTGGTCCCGAAGTTGAAATTGGTGCTCTTGGTGGCCCTGCCTTTGGTGGTCTGA  
AGGTGTAAGTGGTGGCTCTGGTTCTGAAGCTGTAAGTGTGAGAACAAATACAAGTAGTAG  
ATGAAAAATTGCAACAAACACTTTCTTCATTTGTAAACGAATTTCTATCTCAATAAAC  
TTTTTAGGATACACTTGTATTTGA

>**Gsoja\_MSTRG.52475.30** GenelD=Gsoja\_MSTRG.52475;Strand=-;Pos=Chr11:45344746-  
45344832,45345007-45345018,45345067-45345162,45345511-45345654,45345862-45346016,

TGCCGGGGTGAGGGAGGAAGAGGGTGGGTAAAGTGGTGGTGCAGTTGAAGCAGAAGGTGG  
GTAAGATGGAGAGAGTGAGGTTGAGGGAGGGATGGTGGATGGATAGGGCGATGATGGGTA  
GGGTGGTTGAGATGTTGGGGAAGGAGTGTTTGGAGTTGAGAAATAGGAGAAGGAGTGTT  
TGAGGGAGTTGGGACATAAGGTTGGTTGCCAGGGGGAGGTGTTTTTGGAGTAGTAGTGGG  
AACATTTGGAGGACTATAAATTGGAGAAGGTGTCTTTGGTGGTGTGAAACATAGGGAGG  
TTGGTTATGAGGGGAAGGAGCATTTGGAGGACTATAAGCAGGAGATGGTGTTTTTGGAGG  
AGTAGGAACATTTGGTGGAGTGTAATAGGTGAAGGTGTTTTTGGAGGTGTAGGAACATA  
GGGTGGATTGTTACTAGGGGAAGGAGCTTTTGGGGGAGTGTACACAGGAGAGGGTATTTT  
TGAGGCGTTGGAA

>**Gsoja\_MSTRG.52475.17** GenelD=Gsoja\_MSTRG.52475;Strand=-;Pos=Chr11:45344330-  
45344538,45344811-45344844,45344941-45345072,45345421-45346061,

CGGCGAGGGGGTTGTTGCCGCCGACGCGTAATGGCGGCGATGTTGCCGGGGTGAGGGA

GGAAGAGGGTGGGTAAGTGGGTGGTGCAGTTGAAGCAGAAGGTGGGTAAGATGGAGAGAG  
TGAGGTTGAGGGAGGGATGGTGGATGGATAGGGCGATGATGGGTAGGGTGGTTGAGATGT  
TGGGGAAGGAGTGTTTGGAGGTGTTGGATTAATGTAAGGTGGTTGAGATGTTGGGGAATG  
AGAGTTTGGAGGTGCTGCAATGGAAGGAGGTTGGGAAGTGGGTGAAGGAGTGGTGTGG  
AGGTGTGGGAATGTAAGGTGGTTGAGATGTTGGAGATGGGGTTATTGGAACAAAGGGTGG  
TTGATGGGCAGGGGAAGGCGTTTTTGGAGGGGTTGGAGTGTAGGGAGGTTGAGAAATAGG  
AGAAGGAGTGTTTGAAGGAGTTGGGACATAAGGTTGGTTGCCAGGGGGAGGTGTTTTTGG  
AGTAGTAGTGGGAACATTTGGAGGACTATAAATTGGAGAAGGTGTCTTTGGTGGTGTGA  
AACATAGGGAGGTTGGTTATGAGGGGAAGGAGCATTGGAGGACTATAAGCAGGAGATGG  
TGTTTTTGGAGGAGTAGGAACATTTGGTGGAGTGTAAATAGGTGAAGGTGTTTTGGGAGG  
AGTGGGAACATTAGGAGGATTATAAGAAGGAGAAGGTGTTTTTGGAGGTGTAGGAACATA  
GGGAGGTTGGTTATGAGGGGAAGGAGCATTGGAGGACTATAAGCAGGAGATGGTGTGGT  
TGGAGGTGTAGGAACATAGGGTGGATTGTGTTTTAGGAGGAGGTATTGGAACATAGGGTG  
GATGATAAGGAGTTTCTGGAGGAGTTGGAACAGTTGGAGTTTGAAGGAGGTGCTGGAACAT  
AAGGTGCTCTCGGAGGAGTAATTGGAACATAAGGAGTGTTTGGAGGGGTTGGAACATAAG  
GTGGATTTGGATGATAAGGTGCTTTTGGAGGAGTAATTGGAACGTAAGGAGTGTTT

>**Gsoja\_MSTRG.9429.1** GenelD=Gsoja\_MSTRG.9429;Strand=+;Pos=Chr03:485756-486027,

GGAACATTTAATACTTTAGCAACTACTTATATAATTTTATTAATTTAAGAAATATTTGAG  
AGAGAATATACTGATAGGATGGTACTATAGTATAATAACTATCAAGCAATCCCCTGAATG  
TATAACGTACAATAGCCAAACAAACAATGATGATATTGATAAATAGGAGTCTGAACTAA  
TTATCTGATGTACTTGTTCATGATCAAGTTCCACCTTATACCACTTACTAATACGATTA  
CGGGCTATAGTTACCTGCACATTGACATAACG

>**Gsoja\_MSTRG.28713.1** GenelD=Gsoja\_MSTRG.28713;Strand=-;Pos=Chr07:9568099-9568405,

GTTATGATGCATAAGGTTCTTAGAACTATGAGGAAAAGATAATTTTAGTGCAACTTTTG  
GTATCACTTTACTCAATACCTGATAATGCTGTTTGAATTGAATCTACAAAGACAGAGCTT  
GCAAGAATTGGTGTCATGGATGCCACATAACGGATTACTTCAGGTATATTGGTAAAAATA  
TGCCCCCAAATGTTTCTTGACCATGAGAAGAATAAATCCTAAAGCCCCAACCCACGAAG  
GACATTAACAAGGTGACTTTAACCGCTAAATATGCAGCTTTTGGACAGCCAGCCCCTAGT  
TCATTTG

>**Gsoja\_MSTRG.52475.14** GenelD=Gsoja\_MSTRG.52475;Strand=-;Pos=Chr11:45344112-45344832,45345007-45345162,45345337-45345975,45346127-45346411,

ACGACATAAAATTAATTATGAGACGCGATCTCATTGTCCAAGTAAAAATATTAGAAAAA  
ATATATAAAAGTGTTCACAATTACTATATACTATAACTCAAGTTCCAAAGAAAGTTTGAT  
TTTTCTAATCAATAGTGGTACTTAGAGCAGCACCGACCAGAACTATAACTCAAGTTCCAA  
AAAAAAGTTTGATTTTTCTAACCAAGAGTGGTGCTTAGAGCAGCACCGACCAGAAATGGTT  
AGTGAATACACTCCAAACCGCGACGGCGTTATAGACGACGCACCGCAGTTGAAGCAGAAG  
GTGGGTAAAGATGGAGAGAGTGAGGTTGAGGGAGGGATGGTGGATGGATAGGGCGATGATG  
GGTAGGGTGGTTGAGATGTTGGGGAAGGAGTGTTTGGAGGTGTTGGATTAATGTAAGGTG  
GTTGAGATGTTGGGGAATGAGAGTTTGGAGGTGCTGCAATGGAAGGAGGTTGGGAAGTGG  
GTGAAGGAGTGGTGTGTTGGAGGTGTGGGAATGTAAGGTGGTTGAGATGTTGGAGATGGGG  
TTATTGGAACAAAGGGTGGTTGATGGGCAGGGGAAGGCGTTTTTGGAGGGGTGGAGTGT  
AGGGAGGTTGAGAAATAGGAGAAGGAGTGTTTGGGGAGTTGGGACATAAGGTTGGTTGC  
CAGGGGGAGGTGTTTTTGGAGTAGTAGTGGGAACATTTGGAGGACTATAAATTGGAGAAG  
GTGTCTTTGGTGGTGTGAAACATAGGGAGGTTGGTTATGAGGGGAAGGAGCATTGAGAG  
GACTATAAGCAGGAGATGGTGTGTTTTGGAGGAGTAGGAACATTTGGTGGAGTGTAATAG  
GTGAAGGTGTTTTGGGAGGAGTGGGAACATTAGGAGGATTATAAGAAGGAGAAGGTGTTT  
TTGGAGGTGTAGGAACATAGGGAGGTTGGTTATGAGGGGAAGGAGCATTGAGGACTAT  
AAGCAGGAGATGGTGTGTTTTGGAGGAGTAGGAACATTTGGTGGAGTGTAATAGGTGAAG  
GTGTTTTGGGAGGAGTGGGAACATTAGGAGGATTATAAGAAGGAGAAGGTGTTTTTGGAG  
GTGTAGGAACATAGGGTGGATTGTTACTAGGGGAAGGAGCTTTGGGGGAGTGACACAG  
GAGAGGGTATTTTTGGAGGCGTTGGAAAATTAGGAGGAGTATAAACTGGGGAAGGAGTTT  
GTGGAGGAGTTGGAATATATGGAGGATGATTAGCAGGTGAAGGTGCTTGAGTGGGAACAT  
TGGGAGGAGTGATACAGGGGAAGGAGTTTTTGGAGGTGTTGGAACATTAGGTGGATAAT  
GAATAGGTGAAGGTGGTTTTTGGATGAACATAGGGAGGGCTGGAAATAGGTGAAGGTGTTT  
TAGGAGGAGGTATTGGAACATAGGGTGGATGATAAGGAGTTTCTGGAGGAGTTGGAACAG  
TTGGAGTTTGGAGGAGTGCTGGAACATAAGGTGCTCTCGGAGGAGTAATTGGAACATAAG  
GAGTGTTTGGAGGGGTGGGAACATAAGGTGGATTTGGATGATAAGGTGCTTTTGGAGGAG  
TAATTGGAACGTAAGGAGTGTTTGGAGGTGTCGGAGAATAATAAGGAGGTGGCTCTCTCA  
CAGCCAACACCACAATAATCAATTTCTGACCCTTCTCACAAATTATCATCTTTCCCACTAA



TGAAGTAAAATGGACCCGATCTATCAAACCTGAAACTCCGAGTCACCATCCTCAAACCTTCT  
TGATCGGGTTCTTCTTGTTACATTTCTCATAATCATCATTGTTCAACCAACACAGTAT  
C

>**Gsoja\_MSTRG.5531.1** GeneID=Gsoja\_MSTRG.5531;Strand=+;Pos=Chr02:7840680-7841468,  
CCAAATTAGAATAATATAATAAAACAGTCATGCATGGACACTCCATTATTACAAACACTC  
CATTATTTTTCTTGTAACATTTATATTATCTGTTACTTATTTCTTTGCTTTCATTTATTT  
CTTTGGCTCTCTAGATGTTGACGTAGGTGTCTCGTAACATTTCTTTGCGAAACCATAGTT  
TGGTGACTTATTTCTACGGAAAAATCAAATTATATATCTATGTCTATGTGAGACACAGC  
TGACCAAACCTAGCTTTAAGCACTCGTCATGTGATATGATCCATTACGTCTGGTGGTTTA  
GCATCAAATACTCTTCCCTTGCCATCATTGCCTACAAAAATTGCACAAATCCGACACCT  
AATTAACACCAAACATACAATATTTCTACATTGCAAAAAAGAAAGCATATTGGATAATTA  
AGGATAGTGTCAAATTTATCAATTGTGAACCTGTTTTTCCAGTTGGTAAGAGCAGTAAT  
AAGGGAAAGGAGAATCGATTGGACAATGGAGCCAGTGACAATTCCAATCCAGAGGCCCTT  
TGCTCTGAAATGTGCAACAAAGCCAAGTAGGATACCCACAGGAATTCCTACCAGATAAAA  
CGCTCCCAGATTGACATAGGCTCCTAGATGTTGCCACCCACTTCCTCTAGCAACCCCTGA  
TTATTTTATCTATTTACTTATTTATTTTCGTTGCAGGTTAGCAAAATAATAATGATAGTT  
ACTGACAAAAATATAACACACCAAATGCATTGGTAACACATTTTCTAACGTTATCTTTTA  
ACAAACCCG

>**Gsoja\_MSTRG.61707.48** GeneID=Gsoja\_MSTRG.61707;Strand=+;Pos=Chr14:2472615-  
2472625,2477172-2477438,2477763-2477906,  
GACAATTTTTTTTTTTTTTTTGAATAAAGCAACTTCAAAGCACCCATCATTTTTATTAT  
ACTATTTCTTCCTTGCCTTAATCATGAGCTTAATAAAGTTTTCATCCTGAAGTTGTAAT  
TGGTGCTCTTGGTGGCCCTGAAATTGTAATCGGTGCCCTTGGCGACCCTGCCTTTGGTGG  
CCCCGAAGTTGTAATCGGTGCCCTTGGTGGCCCTGCCTTTGGTGGTCCCCGAAGTTGTAAT  
TGGTGCTCTTGGTTGCCCTGCCTTTGGTGGTCTGAAGGTGTAAGTGGTGGCTCTGGTTC  
TGAAGCTGTAAGTGTGAGAACAATAACAACCTAGTAGATGAAAAATTGCAACAAACACTTT  
CTTCATTTTGTAACGAATTTCTATCTCAATAAACTTTTTAGGATACACTTGTATTTTG  
AT

>**Gsoja\_MSTRG.9425.1** GeneID=Gsoja\_MSTRG.9425;Strand=+;Pos=Chr03:460834-461427,

TTCTTTGAATAAGACTAAAAATTATCCGGGAAGTATTATATCATTTATCCTAAAGTACTT  
CTTAAACTAATTAACTATATTAGTCTATAAAGTATTACAAATCATGCTACATAGTTTTA  
CACCTTTGAATAAGACTAACAATTATCCGGGAAGTATTATACCATTTATCCTAAAATACT  
AATTAACTATATTAGTCTTTAAAGTATTACAAATCATGCTACATAGTTTCTCAAGTATT  
GAAAAATTCTTCAAATTAGTCTCTCAATGCTAGTAAAATATATCAATCCAGAGACTAACT  
TAAGGAACATTCAATACTTTAAGAACTACTTGTATAATTTATAATTTAATTAATTTAAGG  
ACTATTTGGGAGACTACATTGATAGTTTATTCAAATACCTATCAAGCAATCTCTTGGCTA  
TATAACACCGGCTAAACAAATAAGGACGATATAGATTAGAGTCTGAACTAATTATCTGA  
TGTAAGTGTTCACGGTCAAGGTCCACCTTAGACCACTTACTAATACGATTACGGGCTAT  
AATTACCTGCACAATGACAATGATTTTCATCAAGTTCTATATCAAATATCTAATA

>**Gsoja\_MSTRG.52475.26** GeneID=Gsoja\_MSTRG.52475;Strand=-;Pos=Chr11:45344745-  
45344832,45345007-45345072,45345247-45345336,45345511-45345591,45345635-  
45345792,45345841-45345929,

AGGGATGGTGGATGGATAGGGCGATGATGGGTAGGGTGGTTGAGATGTTGGGGAAGGAGT  
GTTTGGAGGTGTTGGATTAATGTAAGGTGGTTGGGAAGTGGGTGAAGGAGTGGTGTTTGG  
AGGTGTGGGAATGTAAGGTGGTTGAGATGTTGGAGATGGGGTTATTGGAACAAAGGGTGG  
TTGATGGGCAGGGGAAGGCGTTTTTGGAGGGGTGGAGTGTAGGGAGGTTGAGAAATAGG  
AGAAGGAGTGTTTTTGGAGTAGTAGTGGGAACATTTGGAGGACTATAAATTGGAGAAGGT  
GTCTTTGGTGGTGTGAAACATAGGGAGGTTGGTTATGAGGGGAAGGAGCATTTGGAGGA  
CTATAAGCAGGAGATGGTGTTTTTGGAGGAGTAGGAACATTTGGTGGAGTGTAATAGGT  
GAAGGTGTTTTGGGAGGAGTGGGAACATTAGGAGGATTATAAGAAGGAGAAGGTGTTTTT  
GGAGGTGTAGGAACATAGGGTGGATTGTTACTAGGGGAAGGAGCTTTTGGGGGAGTGTAC  
ACAGGAGAGGGTATTTTTGGAGGCGTTGGAAA

>**Gsoja\_MSTRG.84397.1** GeneID=Gsoja\_MSTRG.84397;Strand=-;Pos=Chr19:37788756-  
37789093,37791007-37792862,

ATGACGTGATATAAAGAGATAGAAAGAAATAAAAAAATCTGACCAAGCTTCGAATTACAA  
ACGAATCCGATTTTACAGAAAGTTATGACGTGATATAAAGAGATAGATAGAAAGTTATCAA  
CTCTTGAAGACTCAAGCTTCGAATTACAAACGAATCCGATTTTTTACTCCAACAAAATCT  
GACCAAAGCAGATTCCAGCACTCATTACGTGATTAATCAAATCAAACCTAGTGGGACGGAA

TTAACTTCTGTATGGGTACGTGACACCTTAATACTGATTTTTGTTTTATAGATTAATAT  
TAGTTATTAATTTGTTTTGTTAGTAAAAGAGATTCAAATCAATCACCTCTCTCTCCTCTC  
TTCACCACCATACCAAATCTTATAACCCCTCCTAACACACTTATAAACTCCTTGATATTA  
TTCAGAATAAAAGCATATCTATGAGATGAGGGAAAAATACTTATTGATTAACTCCACACT  
AACCACAGAATCTGATTCCAGCCACACTTTCTTCAGATTCCGAATCCAGGCTATGGTATG  
TGTAAGAACTGGTAATTGGTGACAAAATTGTATTTATCATATTCATTTCATTGCCTGAGTT  
TAATATATGAACAACTTCTTCATAGTTAAAAACAGAGAGCGCTTGGCCTAGGAAAATTAT  
TAAAATTAGAGAGTAAGAAACAAGATAACATACCAGAATACCATTGGCAAAGCGTATGAT  
GACAGTGAACACAAGAGCATAAGCAGCGAGTTCCTTGAACCAATATGACCAATAAATGC  
TTGGCTTATAACACTGATGCCAAAGGTGGTGAACCTTGTGAATATGGCTGGTGCTGCCAC  
TATCCACATCACCTTGCTCTCTCCACACCCTCTTCACCAATGATAATTTCTCTTCTTC  
TTCTTCTTCTCTGATTTTTTTCTCTGCTCAACAGCTTCTTCTCTAGATTCCCCTCCAT  
TTTTGTGTCTTATGTCGTTGTTGGGGACTCTTAAGATCGATCAGAGACTTAACAGTTCA  
CAAGGGAGTTTGGGGCTGATATTAACAGAAAATAAAAAAAGAATGAGTATATATCTT  
ATCGTTGCTCTTGACGAGAGGAACAGCAACTAGACGCACACTATACACAAGAACTTCAA  
TTTATATGCACCAGGAGGGGTACTAAGTGTAACATCCCATTTTTTTCATAAATAAATTTA  
ATAATTTTTTTTAGTAAAAATAATAAAAAATAAATAAATAGAGTAAATAATAGGTCGTAAA  
TGCCCCTAACTATAAATAGCGCTAGGTTTTTCAGATTGACTCCTCAGCCTCCTCTGTCTC  
TCATTTTCGTTTTTCCCCTTCTCCTCTCAAACCCCTTCTTTTTCCCGTCGCCCACAAAA  
CCTGTCTCAGAAAAATGATGATCTCGGACTCATTACCGTTGGATTGTCGTGAAATTTGA  
GCACCACGTTGCAACCCAATTCGAGAATTCTACCGTTGGGAATTGAAAAATCATGTC  
TGGGCTTAGAGGAAAACCCCTTCGATTGTAGCTTTTTATTTTTCCGCAGAAACCCAAAAC  
TGTCTCGGTAAAACTACGATCCCGATTTCGTTAACCGTTGGATTTTCATGAAATTTGGAT  
ATGTTGCTCGAAATTAATTTCTCACACTCTACCGTTGGGATTTGCGAGATAATATTCT  
TGGTGGGAGAAAAAGGAACCGCATGAAGACAGTACAAGCGGAGGCTTCAATCTCTTCTCC  
GTCTCTCTGACGTTGAGAATTCTATCGGAGCAGTCGGAGGAAAAACTTGAGGAATCTCA  
GGAAACCGCTATAGATGTCTCTATCGTTGTCGGAAGACACGTGAGTCCACTTAGAGACGA  
CTAGGTGAATTGATTTAAGGAACCTTTTGCTGAAGGACGTCGAGACACAACGCTCTGATA  
GGATGTGACATTGGGGTATAGGGTTTTATTAATTGTATGAAGTCTTAAACGGTCTTGC  
TTAAACCGAGATAACTTTATTAGAAATTTGGACAAGTTTGAATATGATGTAGAAGAAAGT  
GAATGTGAGCCTTTTATCCCTTTGAAAACTTGTATTTACACATGTAAAAAAAATACT

ATTAATTAATATTTGGATTTTTATTCCTTTATCAGTATATATGTGAGAGATAGAGGGTGT  
CACAGTAAGAGAATCTTTTATCACATATATTATT

>**Gsoja\_MSTRG.57214.1** GeneID=Gsoja\_MSTRG.57214;Strand=-;Pos=Chr12:39966271-  
39966421,39967073-39968662,

ATTTTTCAAACAAAGAATGAAAATAGAATGTTTCTATCATATTTTTTTCATTCTCTATT  
TTCTCCGAACAAACAATGGCACAACTAAAGCAGCTTATTGTACTTGAATGGTGATTATT  
TCACACCTCATTTTGGGGTATATGCTGCTTAAATTAATAAGAAATGCTGAAAAGCTAGA  
TATAATGGGGAAAAAAGTGTTAATTTTGATATATTTTGAATCTGGAGAAGGTTGTATAT  
TTTTATATATGAATGGATTTGAAATTTTCGATGAGAGATGCAAAGTAAGAAATAAAGAAG  
TTACCAGATAGAAAGGGAATCAAGAGCCAACCTCAGGATTAGGGAGAAGCCCCGCGAGCAA  
AACCAGAATCTGAAAGTACCATGTCTCCAGGCACAGCATGACCGCGGACGCAGCGGAGAG  
CTTGAAGAACCCATACAAACCGCTAAACGCCTCCACGTGAACCCCTGCCACGTGCGCCT  
GCACCTCTCGCTCTTCACTATGTACACGTAAGTGTCCAATCACCATTATCCACCACGACAG  
GCTCAGCACCAGCGACGCCCCAACAGCCCCAACCAATCTCGTACACCGCCACCCAAT  
CATCCCCAGGTGGACCACCAGCGTCGCCGCTGATATGTACGCGCTCGGTGCCACTATGCT  
CTGCGCTTGGAGAACTTCTGGATCGGGAAGTTCGCCGCGTATGCGAATATCTGTGGGAT  
CAACCCGTACACAAAGAGTGCTGCCGCCGACGCGATTCTCGGTGATTCCCCGAGGAATAT  
TAGCATCGGTTTCGCTGAATACGTATATCACGGTCAACACTACGCCGGCTAGTGAGAGAAG  
AATCGTTGACCGCTGCATGTAGACTCCTAACATCCCGTACTTTTGAGCTCCGAATGCTTG  
TCCGCATAGCGTCTCCACGGCACTCCCCATACCCAATGCAAGTAATATATATAATTTTG  
TGTTTTCAATAATTACGCGCAATTATCAGCAGAGATTCATTGAAAAGAAAATGGTGGT  
ACCATGAGGCCGTAGGCGAACATTTGGATGCCGGTGTTGCCGAGGGAGGCGGCGGCGAGT  
TCGAGGTTGCCGAGGTGGCCGAGAAGATTTGGGTGGACATGGACATGAGGTAGTTGATG  
AGGTAGACGATGACGGCAGGGGCGGCGAGGAAGAAGAGGAGCTTCAACTCGATCCACGTG  
GCGGGTCCCACACGGTTGAGGAAGGGTAGGGTGTCTCGTGAGAGAATTCTCTCAAGTTGC  
CCATGGGAGGAGGACTCGTGCTTTGAGTTTGATCGAGTTCCCTCCGCTGTTAACAGTGGC  
TCTTTCTCCGCTGAACCCATTGATCTCGATCCGAATTCACGGCAAAGAAGGCTTTCTCTC  
CTGTAACGTTTGGAGCAGCAGCAATCTCGCCGCCACAAGTCCCAACTCACCTACCACGAG  
GAGCCGTAAGGCACACCATCTCTTATATATACACATATAACGAGAATATTATATTATATT  
ATATTCAACAACCACTAGGAGGCGGAACTCACTGTAATTATAACTGATTTGAAACGTGTT

TGGGTGGGATAATCGTAGAAATGCTAGCTTTTTCGTTATGAAAATTACTAGAATATATGT  
GTTGATTTTTTATCCAAGTCAATCTCATTTTTACAAGAAAAAAAAAAAAACAGAATGTTA  
ATTTTTTTTTTCAGCCAAAAGAAAAGCTTTTAATAAATGAAGGTACAGGGTACCAATCCG  
T

>**Gsoja\_MSTRG.82273.1** GeneID=Gsoja\_MSTRG.82273;Strand=-;Pos=Chr19:77385-77406,96440-96460,158277-158457,

TCCCTCGAATTTTAGGGGGCATGGGGATTGTAATTCTTCAACTTCTAGAGGTATAATGA  
CAGATCGAGAGGCTCGATTAGAAAGAATTGGCGGAGAAGTTTTATGTTATATATGGTAAT  
CTTTCTAACACCCGAATTATATGAGAACTTCGATCCATTTTTGGTAAAAAAAAAAAGAA  
AAAAAAAAAAAAAAAAAAAAAAAAAAAAAAAAAAAAAAAA

>**Gsoja\_MSTRG.32570.1** GeneID=Gsoja\_MSTRG.32570;Strand=-;Pos=Chr08:3998727-3999590,

ACAAGATCTAGTTAAGAGCATCACATTAGCATCATTTTGCAAGGGAATTTACCATACCAG  
TGCATAACAGCTGAAGGAGCAGCGAGTTTAAGGAAATCAAGAAGGTTGTGCAGGGCCATC  
TTGGAAAAACCTGTCCAAGAGTGTTTGCATGCAGAAGAGAACCTCACATACAGAGAAATC  
AAGATTACATTTATCCAATACGATATGGAATTGGCCAAGGCTGCTCCTTTGATTCCAAGC  
CCTGACTTGAAAACCAAAGCCAACACAAAAGGACATGAAGCACAGCTGCAATTCCAGAA  
GTTAGCACCATTGGGAACACAATCTTTTGGGTTTGCAAGAACTTGAGAATGCACTGAAGA  
AGACCGTATGCAAATAAACTCGGGATCATGTACTGGGTGTATGAGCCGGCTTCCTTGAT  
ATGGCTTTGTCTTGGTGCATAGCCTTGAGAATTGGTTCTGTGTTGTACCAGATGATCGAA  
AGGAACACACTCATCTAAAACAACAAGCATGGATCTCTGCATGTGTATTCCAAGCATA  
TGGTATTGTCCTGCTCCATTTGATTGACCACAAAATGTGTCCAGTGCAGTAGCTAGCCCC  
AACAATAAGTTGAAGCCGGTGGCCGATGCGAAGGAAGAGGCCATGGAAGCGCCGGAAGA  
GGGAGGGTACCAAGATGGCCAATAACATGACAGAGATGGCTTGAAGAATGTATTGTAAA  
ATTCCAAGTGAAGAGAGGCACTGCTAACCATAGCAGCCTCTCACTTCTTCCACCACT  
TCTTCTCTCCCAATTCTCATTTTTCTTCAGATACATGCAAACATACAGACTACAGACTC  
TGCTGCCACCTTGTTTTGTTTCGG

>**Gsoja\_MSTRG.26929.1** GeneID=Gsoja\_MSTRG.26929;Strand=+;Pos=Chr06:48015542-48016055,

CTGGGACAGCAAAGCGAAAGAAGTCTCCAACACCAACCAAGCATTCTTGGAGAAAGGGA

TGCGTGTTTTCTCACAAGCAGAGGAATACCTCACAAAGGACAAAAGCAACATCACATTAA  
ACCAAACACAAAGGCTGAAGGAGATTGCAGCACCAACATGTCCCAACTCCAATTTAAATA  
CAAGGGTCCAACATGTTGCTCCGTGGAAGCACAAAGCTATGGCAGAGGTTAGAATCATGG  
GAGAAATCAAACCTCTGGGTCTGGAAAAATCGTGTTAGAGGTTTGAGAATTGCGGAACCAA  
ATAGAGCAGGTATTAGCCAAATGGCATATTTACGAGCTTCAAGGGAAATTGTTGGGTCTT  
GGCCTAAGAGTGTTAATATTTTGTCCATGAAAGTCCATAGAATTGTGATTGGGAAACAAA  
TCAAAGAAAGGGAGATTACGGCAGTGTAAGTATATTGTCCAAATTTTCATATTGCCCTG  
CCCCGAAAGCTTGGCCACCTAAAGTTTCCAATCC

>**Gsoja\_MSTRG.77247.1** GeneID=Gsoja\_MSTRG.77247;Strand=+;Pos=Chr17:40637108-40637356,

GGACTAACCTGATAGGACTGGTTGAAGGCTGTTTAGAAGCACTGTGACAGCTAGCAAAGC  
AGAAAGCCTAGTTGTTTCATTGGCAACTGGAACACTGGTGGTAAACAAGTAGGGAAAGTA  
ATCCTTTGTTAATAGCACTCCGATCATGACAACAACACCTATGGACACTGATGTGATGGA  
AACCACCCACACTGAAAACCTTGCAGCCTTGAAATCACCAGCTCCAAGTTCATTTGATAC  
TCTCACACT

>**Gsoja\_MSTRG.28719.1** GeneID=Gsoja\_MSTRG.28719;Strand=-;Pos=Chr07:9581432-9581504,9581832-9582136,

GGGTGTTACACCTCACTTTTAAAGAACTAAATCAAAATTTATCAGATAACTGAATTCC  
AGCGGGGATTACTGTTTTTGTAGTGTTATGCTAACGAATAACTATGGTTGTGCTCTAGGT  
ACATTGATGTTGATCTCAGTTTCGGATTCATATAACCAACATTATTATTCCAAGATAAGT  
CACTAGTTCTACACGTAAAACTAGAATTAAAATTCTTCAACTATCAAGCAGTATTGGCAT  
TTTGGTCACACGGAAGGTCCCCAAGTTGGACTCCATCGCCTCCTACTCTTTTGTGCTGCCT  
TTTTTACTTCTTTCTCCCAATTGGCGCGTAAGGTGACCAGAAGGAAACACACCACTTGC  
ACAGTAAGTGCTATTAGG

>**Gsoja\_MSTRG.9428.1** GeneID=Gsoja\_MSTRG.9428;Strand=+;Pos=Chr03:464035-464552,

GTTGACAAAATTATGTATCATATTCATTGCCTATGAGTTTAACAGATGAACAGTTCTTAA  
AAATAACAAAATGCTTTATAAGCACTCTCAAATTCTGGCCTAGGAAAAAAGAAATTGTG  
AGTAAGAACATAACATACCAGAATACCATTGGCAAAGCGTATGATGACAGTGAATACAAG  
AGCATAAGCAGCGAGTTCCTTTGAACCAATGTGACCAATAAATGCTTGGCTTATAACACT

GAGGCCAAAGGTGGTGAACCTAGTAAATATGGCTGGTGCTGCCACTATCCACATCACCTT  
GCTCTCTTCCACACCCTCTTCACCAATGATAAATTCTCTTCTTCTGATATTTTCTC  
TCTGCTCAGCAACTTCTGCTTTAGATTCCCCTCCATTTTTCGAGCCTTTTTTTGGGGGCT  
TCTTAAGATCAGAATAGAGGAGGGAGTTTGGGGCTCACTGTTTATAAAGAAAAATGGAAT  
AAAAGAATGAGTATCTTTTCGCTAATCTTGCATGAACC

>**Gsoja\_MSTRG.52475.25** GeneID=Gsoja\_MSTRG.52475;Strand=-;Pos=Chr11:45344745-  
45344832,45345007-45345162,45345337-45345354,45345529-45345617,

GACATAAGGTTGGTTGCCAGGGGGAGGTGTTTTTGGAGTAGTAGTGGGAACATTTGGAGG  
ACTATAAATTGGAGAAGGTGTCTTTGGTGGTGTAGGAACATAGGGAGGTTGGTTATGAGG  
GGAAGGAGCATTTGGAGGACTATAAGCAGGAGATGGTGTTTTTGGAGGAGTAGGAACATT  
TGGTGGAGTGTAATAGGTGAAGGTGTTTTGGGAGGAGTGGGAACATTAGGAGGATTATA  
AGAAGGAGAAGGTGTTTTTGGAGGTGTAGGAACATAGGGTGGATTGTTACTAGGGGAAGG  
AGCTTTTGGGGGAGTGTACACAGGAGAGGGTATTTTTGGAGGCGTTGGAAA
