# Supplementary material for: The Identification of MATE Antisense Transcripts in Soybean Using Strand-Specific RNA-Seq Datasets
Source: MDPI journal article supplement (doi:10.3390/genes13020228), 2022-01-26
Supplement: s1 [file s1]

**Supplementary Material 2:** Sequences, chromosomal position, and strand information of *Glycine max* MATE antisense transcripts predicted from the *Glycine soja* MATE antisense transcripts identified in this study.

>**Gmax\_MSTRG.58089.1** GeneID=Gmax\_MSTRG.58089;Strand=-;Pos=Chr11:8552160-8552384,  
CAGCATACTTGTGAAACCATTGTAGCCACGCAGCCCCTACAATTCCATAACCTAAATAG  
GTGCACAAAAGTACACAACCAGCGACATTTATAACTGTAGCAGCAGCTAAAGCTTTCAAG  
GGTCCCAAGGAATCTTTCATACCAAGACTGCAGAATGTGAATACCAAAACAATAAATTGA  
TTCAATAAGCCAAGGCTTACCATATTTTTCAAATCATACAAAGCA

>**Gmax\_MSTRG.99027.1** GeneID=Gmax\_MSTRG.99027;Strand=-;Pos=Chr19:37884598-37884798,  
ACTAAATCAATGCATATTCAATACTTTAAGGACTACTCATATAGTTTGATTAGTCTAAGG  
ACTACTTAAAAGAGAGTGATACTTTATCTAATGTACAACACTGGGCAAACAAATAATGAG  
GATATAAATAGGAATCTGAAACTAATTATCTGATGTAGTTGTTTCATGATCAGATTCCAC  
TTTAGACCACTTATTAATACG

>**Gmax\_MSTRG.47704.1** GeneID=Gmax\_MSTRG.47704;Strand=+;Pos=Chr09:40373194-40373705,  
ATAGAATATGAAATAAGAAAATATTCCATTAGTGCATCAAATGACTTATTACAACAAGAT  
AAAATAATTGTACTACTCTATTCTATCCGAACTTAGTTTACAGTCACAAAATTACCCCT  
AATATAACCAACCATAGACTCACCAGTGGGGCAATGAGAAAAATTGAAAGGTTTTCAATA  
ACTAGATCAAAATCACATTTAGTATCTTCTACACAAGAACATAATCTTTTCCCTCCAAA  
AACATCAAGACGTCCCCTACCAACACATACATAAAAATAAAATAATAAAACCACTTTATT  
CACTTCCAATGGCCAACTGCATCATCTATCATCTTTCGCGCATATATAATTGCCCTAGA  
CTTTTCTGCCAAAAGAAGGATACCAAAACATGTATTGTTTTCATCCAAATAGAATTTAAC  
TCAGAAATGTGCAACTGCAACGATATTGCATCTTCATGAAACTAAGCTCTCAAGTGTTACT  
GAATTATAGACTCTATCTGTTGCTTTCTTTGC

>**Gmax\_MSTRG.10872.1** GeneID=Gmax\_MSTRG.10872;Strand=+;Pos=Chr03:504887-505173,  
GCATCTTCCTTAAAAAAAATATTGGTTGTAGAGTATTGCTTTTTTAAATAACAATGTCC  
AATTAAATTCAAGGATCCGATCCTATCCAACATAATTTGCGTCCATACAAATAAACAATA  
TTTGCCTGTATAACACTAGCAACAGAAAATATATTGCCATAAATAAATCCGTGGCTAGAT  
TCATTAATTTTGAATTTAAAAAACTAAATCAAAGAAGGAACATGAAACTAATCATCTGAT

GTAATTGTTTCATGATCAGATTCCACCTTGGACCACTTATTAATACG

>**Gmax\_MSTRG.6395.1** GeneID=Gmax\_MSTRG.6395;Strand=+;Pos=Chr02:7919393-7920474,

CTCCACCCTAGACGTTTACTTCCAAAGCTTATTTGGTTGTAAGTTGTAAGTCAAGACTAT  
AAAACATGCATCTTCTTCCACCTCGATACTATTAATTGCATTGAATCTGCAAAACCATA  
GAGGCTCCCACCACTTTGCATTCCACAACATTATACATAGACATAATAACTTTTATCTGT  
TTACTTCACCAAATAGAAATAATAGCAAAACCAGAATCTGACAGAAAATTAGTCATTAC  
TTCCTTTTTCTTCCACTCTTTTATTCTTCTACTATAATTGCAAAATTTAAATTTTCAGAC  
TGAACCATTATGAGCTTTAATTGACTTCTCAACTATTCTCACCTTGCTTTTGTTCCTG  
CAGTAACCACAAAATACAATCATTTAGAGCCACTTTAATTAACAGTCAATTGTTATCCAT  
TGGATTCATCAAGCAAAGGCAACAAAAAGGGCTCAAACTAGAAAGGAAAGCAAAAAAACA  
AATGACACGTGCAATTATTAACAATGGAGAAGTTAAACTGTTACACTGTTAAAAAAGTA  
AAAACCAACCTCTTTCTGCCAATCTGTTAACTGTTACAACAGTCAGAATAATCACTTG  
TAGAACAGATCCTGTAAGACTTCCCATCCATAGTCCCTTGGCATTGAAATGTAGGACAAA  
ACCCAATAAGAATGCTAAAGGAACTCCCACAAGATAATAGGCTCCAAGGTTACATAAGC  
TCCTATTTGCTGAAATCCTCCACCTCTTGCAATCCCTGCACATATGAATATCCATTTTAT  
TGCTAATATTTGTGCTCAATTAATGATGCTAGAAATAACATAGACTATTTTCAGCAAATAAA  
AACTCACCAGAAAGAGCTCCTATTAGACTATCTGCAGTAAAAGACCCACAAAGAATGGGA  
ACAATATCTGAAACATAATCTACAACCTTCCTTGTCGTTGCTATAAGCATATCCTAATATA  
TGCCTACAACAAACGAAGAAAATGCTGACAATAACCCCATCAACAATTCCAATAATCACA  
ATAACACGAACAATACCTTGAGCTGCCTTTGGATTCCCTGCTCCTAATTCATTGAAATG  
CG

>**Gmax\_MSTRG.54537.1** GeneID=Gmax\_MSTRG.54537;Strand=-;Pos=Chr10:46174491-46174911,

TACCTGAATATGTCACTATTTTATGCTATAAATAATTTTATTACCTAATCTAGTCCTGC  
ATAGAGATATATTAGCTCATCTCTATGTCAGAGTAAAAGAAAATATCGATGTTTTTCATT  
TTTCACTGAGATGCTCAATAACTAAAAAATGAAAATTAAATTGGAAAAATAACCAAGTTT  
TTTTATCTTAATCAGACACCACGGCTAACTATGTTCTGTACCTAATTGGAATAGAGCAA  
CATTACGTGTAAATGGACAGAGAAGGAACACATAAAAAAAAAAAAAACAAAAACAAAAGAC  
TTTGAGAATTTGACTCGAGTGGAGGTGGAAGATATACAGGATTATGTAGAAGCCACTATC  
TTATCAACTCCAATGTCTTGTCTCCCATATCCGCATGCGTTTCAGTTGTTTGTCCACC

T

>Gmax\_MSTRG.91144.1 GenelD=Gmax\_MSTRG.91144;Strand=+;Pos=Chr17:40285361-40285584,  
CTGGTTGAAGGCTGTTTAGAAGCACTGTGACAGCTAGCAAAGCAGAAAGCCTAGTTGTTT  
CATTGGCAACTGGAACACTGGTGGTAAACAAGTAGGGAAAGTAATCCTTTGTTAATAGCA  
CTCCGATCATGACAACAACACCTATGGACACTGATGTGATGGAAACCACCCACACTGAAA  
ACTTTGCAGCCTTGAAATCACCAGCTCCAAGTTCATTTGATACT

>**Gmax\_MSTRG.54675.1** GenelD=Gmax\_MSTRG.54675;Strand=+;Pos=Chr10:46755636-46757588,  
GTGCAAGTTAATTAACCGATGGCAAATAAAAGAGAAACAACAACAAGACGATAATTACGT  
GAAAAATTTTAACATTATTATTGTAGTTAAATTCCTTGATCCACCCATGTGATCTAAAGT  
TATATTAATAAAAAAAAAAGTCATCCTCTGTCACTACCCTCTCCTTCCCTATACAGCTAAAGA  
CAAATTCCTGATAGATTTCTCTCTCTCCCTTTGTCTTCTTTGATTTTTCCCTTTTGGTT  
TTTGTTCTGTCCAAAAAAACCGAGATTACTAAAAGTTAAACCCACGATTGTTTATCTTC  
TTCTGAATCAGCTAATGATAATAAAGAATCTTCCTTGATTTGAGCTTTGGGTGGCTTCTC  
TGCACCAACCTCTTTGCTGTCATCAACAGCAACAACAACACTGGTTAGTTTCTTTGCCCT  
TAGAGCCTCAACATCCCAATCCGTTTGACTCATAACCACCAACATGGTCACTGCACAAGA  
CCCCTGAGCCGCAAGTAACCAAGCCACAACCTTGAAAATCAAGCCCTGCGAAGAAACC  
AAGCCAAACCGCCACAGGCATTCCAACAAGGTAGAAACAACCTAAGTTAATGTTAGCACC  
AACTTTAGGCCTTGCTGTGCCTCTTAGCACTCCGCACCCCGTTGTTTGAGGACAGTTTCC  
GAGTTCGCAGAGTCCTATAATCGGTAACACCAATGAGGTCAAGGTTATTATTCCTTGTC  
TTGTGTGAACATGCTGGCCCAAATGTTCTAACCAGAATGGTGAAAACAAAAGCTAAAAA  
ACCTAACATGAAGCTGCAAGAGAGGCCAACTATGGCAGAAAGTTTAGCCTTTGAGGGCTT  
TTGAGCACCTAATTTGTTACCAACTCTTGTTGACACGCTGAAGCTTATTGACGATGGGAG  
AATGTAGAGCAGAGAAGTGGTTTGGATCAAAATCCCCATGGAAGCCACGGTTGCTCTAGG  
ATTCACCAACAACCCGCATAACAAAATCATGATCTCATACCACCACCATTCTAGGCACAC  
GGAAATGCAGCTTGGGATAGCCAAGTCGAGGAGCGATTTCCATTGCGTGAAACACTCAAA  
AGAAAAACCTCCCCATGTTTTCTTATGCGTACCAGAGAAGACTATGTAAAGAATCAAAGA  
AGCTATGAGGTTGAAGTTAGTCCAAACCCGCTGAGAGCCACGCCTTTGATTCCCCAATT  
GAGGTGGGAAACAAGAAGGTAGTTAATGGGGATGTGAAGGAGAATTGAGAAAGTGGCGCA  
GAGAGTGAGAGGCAGAGTAATGGATTGGCTTCGAAGGTAAATTCTTAAAGGGTGTA AAAA  
AGATTGTGCTAAGAGGTCAGGGATGGAATAAAGAAGATATGATTGGGCTTGTGTGGCTAT

GGCCTCGTCCTGGCCACATAAAAGAAGGATATGCTTCATGTAGAGCCAAAGGAGAGAGAT  
TGGAATGGAAGTGAAGAGGAGCAAAAGAATGGTTCTTTGTAAGCAGAGGCCGAGGAGGGT  
GAACTTTTTGGCACCGTAGGCTTGTCCGCAAAAGGGTTCCATTCCGACAGCGAGGCCGGA  
GAGGATCGAGTAACCGGTGATGTTGGCGAAGCCGACGGCGAGTGAGCCGCCGGCTAAGGC  
CAGCTCGCCGAGGCGGCCGAGGAAGAGCATGGAGATCATGGAACGGCAGTAGAGCAAGAG  
ACCGGTGAGGATCATGGGGAGGGCTATCTTGGATATGGAAATGAGTTCTTTCAAGACATG  
ATGATGGGGTGGTGTACTGTTATGTCCTTTGGATCAAGGGGTTAGTGATCTTCATGTC  
GGATTCTCTGCCTCTTGGGATTTTCATTGAGTTGCATTTGCAGGGGAGCTGGGAACTTAT  
ATGACACATAGTTTCGCGAAAAGAGTGGTTTAGAGAACACGTGAAAGTTGAACTGAGAAA  
GAAAGAGAGAGAGAGAGGATTCTAGGGGAAAGG

>**Gmax\_MSTRG.85655.1** GeneID=Gmax\_MSTRG.85655;Strand=-;Pos=Chr16:34064665-34065179,  
TGGCACCGATGACACCTTGGTAAACACCGATAGAAGAGAGTTCAATGTCTCCAATATGAC  
CAGCATAGATGGAAGTTGAGGAGTCCATGAGAAGCTGAAACAGTGCAAGCAGAGCCATTG  
GGAGTGCTACTCTCCATATCTTCACTGTCTCCGTTTCGCAAAACAAACATAACATCCTTCA  
AGCTTTCCACCGGCAAATAGTCGGGTTCTGAAGTATGCTTTGGATCACTAATGGGGTTT  
CCATTTGAGGAGTTCTTTTTCTTCCCTCAACACTCAGTTTCTTCTAACTGAAGTTTGT  
ATAAACTTCCAATCATACAACAAGGAGTCATAAGGATGGCTTGGTTGTTGAATGCAGAAG  
GGTGAGAGAGATTGCTAACAAAACTAACAAATTAACAATTAACTTTTGTCAATCAAATA  
AAAATAATAACTTTCAAATCATAAAAGCCAAAATCTTAAACAGATCATGTAAAGCTTTGA  
CGCAAATGAGTAAGCACGAAGGCTTTCCTTTGAT

>**Gmax\_MSTRG.10867.1** GeneID=Gmax\_MSTRG.10867;Strand=+;Pos=Chr03:490615-490977,  
CAGAATACCATTGGCGAAACGTATGATGACAGTGAATACAAGAGCATAGGCAGCGAGTTC  
TCTTGAACCAATATGACCAATAAAAGCTTGGCTTATAACATTGATGCCAAAGGTCGTAAA  
CCTTGTGAATATGGCTGGTGTGCTGCTACTATCCACATCTCTTGTCTCTTCCCACACCCT  
CTTACCAATGATAAATTATCTTCTTGACACTTCCTTTGCTCAGCAACTTCTTCTC  
TAGATTCCCCTCCATTTTTTGAAGTCTTCTTCTTGAGATCGATCACTGTACACAAGGGAG  
TTTGGGGGCTGATATTATAAAAAGAGAAAAAGGAAGAAAAAATAAACACAAGTGAATCT  
AGC

>**Gmax\_MSTRG.10876.1** GeneID=Gmax\_MSTRG.10876;Strand=+;Pos=Chr03:545409-545697,  
TACGAGCAAAAGTAATGTCTCTATTGAAAAATTCAAAAGTAAGAAAGAAGTCCACTACTT  
TTGATTGAAGACTTTATGATCAATAAATAACCATTTCTTCACCAAAAAAATGACGTACAA  
TTGCTATCTACTTTTTTGCTGTATCACAACATAGTACATAGATGATGACACTGAAACTAA  
TTAGCTAACGTTTTTCTTTCTACTTCATTTTCATGATCAGGACTGTCCACCTTCGACCA  
CCTGCTAATACGCTTCTGAGCAATGGTAACCTGCACAGCATGATATGAT

>**Gmax\_MSTRG.58093.1** GeneID=Gmax\_MSTRG.58093;Strand=-;Pos=Chr11:8558800-8559215,  
GTCCACAAATCCAAAGACCCGTTGCTGGTCTGTAAACATCACAATTTCTTTATCTGAC  
TCCATATGCTTTGCTTCGCGAGTTCCTTTTTCTCACCTGCCTCGATATTTCTTCGTCTT  
TTTCTTCTTCTTCAAAAACATCACTGCTTTTGCTTTCTGCTTTGGCTTTGAAATGCGCGAA  
CGGTTACGGCGAAGAGAGTGCATGAAATGTGGAGACTGAGGCTGCGCCGGAGAGACACG  
AAGTGGGAGGAAGGGAAGGTGCAAAGAAACGAAGGGGAATGCGATGGTTTGAATGCGACG  
AATTAGGGTGCTGGTGGCGGAGAGAGGAGTGAAGAGATAGTGACGAGAGTTTCAAAGCCA  
TTTTTCGCTCTCTGCTTTCGTTTGGTAGAGGGAACGAAAAAGAACCCGAATATTTT

>**Gmax\_MSTRG.62822.1** GeneID=Gmax\_MSTRG.62822;Strand=-;Pos=Chr12:8614915-8615378,  
CTGTTAATAGGATATAGTGTAGCTAGACCCTAGATATAGAATGGTTTCGTGTAAGTAGGG  
ATGATTCATGAAAATGAAATTGTCTATATATAGTTTTTATATCAATGGTTTAATTCTTAT  
TGGATAAAAAACACGCGGAAGAGAGGCAAATCCAACCATGCATGGATGTGCATCACATT  
TTTATTTGTAGTGATTGGAATGAATATGAAAGTTAAATGAAGATATTACCAGATAAGACA  
GGTTGAATGCCGTTGAGAATAATAGAAAGAGCAAGTAGAGGACAAAGATCTGAGACAGCA  
GCAGCCACCTCTTCACCGTCTGTGAAGCATAGCTAATGACATCTCTTATTGCCAGCACCA  
CAAGTGCTACAATAACTGATATTATGAAAGAAATCAATGTCACCACCACAACCGAAAATG  
ACGCTGATTTTGGATTTCTTGCCCCTAGTTCATTGCTCACTCTC

>**Gmax\_MSTRG.10865.1** GeneID=Gmax\_MSTRG.10865;Strand=+;Pos=Chr03:484058-484336,  
TGCTAGTAAATATATAAATCCAAGGTCTAAATACAGGAACATTTAATACTTTAGCAACT  
ACTTATATAATTTTATTAATTTAAGAAATATTTGAGAGAGAATATACTGATAGGATGGTA  
CTATAGTATAATAACTATCAAGCAATCCCCTGAATGTATAACGTACAATAGCCAAACAAA  
CAATGATGATATTGATAAATAGGAGTCTGAAACTAATTATCTGATGTACTTGTTTCATGA

TCAAGTTCACCTTATACCACTTACTAATACGATTACGG

>**Gmax\_MSTRG.5537.4** GeneID=Gmax\_MSTRG.5537;Strand=+;Pos=Chr02:3724328-3724482,3724528-3724695,

GGGTCCGGCTGTGCCTGGTGCTGGTGGAGAACTAGCGGAAGGGACTGGTGAGGTTGCAGG  
AGAAGAAGCAGGTGTAGGTGCAGCTGTTGGTGTTGGCGTTGGTGTTGTTGCTGGTGGTGA  
TGTTGCTGGTGGAGGAGTTGCTGCTGCTGGTGGTGGTGGTGGTGGTGGTGGTGGTGA  
TGGGGTTGTAGTGGGTGGTTGTGTGGGTGCAGCACCTGGGGCTTGTGCTAAGCATGAGCT  
AGCCAGAAGACCCAAGATCAGAAGAAGTTGTAAAGCACCAGAACCCATCTAGCTATAGAG  
AAAATGAGAGACCAAAGAAAATG

>**Gmax\_MSTRG.65373.1** GeneID=Gmax\_MSTRG.65373;Strand=+;Pos=Chr12:39628871-39629081,

CCCATGTTCCCTGTAGCTAATTTTCCACATCCCAGATGTAAAAGTACTCTTCGCTACA  
ACATTGTTTGATTGTCGGTTTCCCCCTTGAATTTTTTGGAGCCTCAACATTTTCTTG  
GTTATTGTTTCATTTTCTATGTTATCAGTTTCAGTTTCTTTGTTAATCAACCTTTGGATA  
GTATCTTCCTCAGCCACAAAGGAAGTTGTAA

>**Gmax\_MSTRG.5537.1** GeneID=Gmax\_MSTRG.5537;Strand=+;Pos=Chr02:3702043-3702058,3723845-3725003,

TTTTTTTTTTTTTTTTTGTAAAGTAAAAAGAATGACAAACTGTTTTATTCTTTCAATTATT  
AGATGTACAATGAAATGATCAAGGTAATCTACATACACGTGTGAACACCAAAACAAATGA  
ATCACCAAATAATCATCATCAACGGCCACCACCCCTCCCAAATCTCGAATGGACAAACAC  
ATCAACAAAGTACAAAAGTAAACAAAATAAGTAAACACAAAACCCGAAGAAAATAAAAC  
CGCTAACTCAACATATGACCAGAGGATGAAACAAATCAAATGGATCTCGTCCGTCCGTGT  
GCGGGAAAGAAGGATCAAGGGCGGAAAAGCCTCCACGTGGACGAATCATCAAGACAATG  
CTTCTCTCGAAAGTTTTTAAGCCAAGACCATGGCTACGAAGATTCCAGAGAGTGCGGAGC  
CAGCAATGAAGGCCTTGCTGGCGGAGAATGCGGCGGAGGGTGGCGGTGGTGGCTCGGCGC  
CACCTGCGGGTCCGGGAGCGGGTCCGGCTGTGCCTGGTGTGGTGGAGAACTAGCGGAAG  
GGACTGGTGAGGTTGCAGGAGAAGAAGCAGGTGTAGGTGCAGCTGTTGGTGTGGCGTTG  
GTGTTGTTGCTGGTGGTGATGTTGCTGGTGGAGGAGTTGCTGCTGCTGGTGGTGGTGTG  
CTGGTGGTGGTGTGCTGGCGGGGTGGGTGCTGGTGCAGGTGCTGATCTTGGTGGTGGTG  
GTGATGGGGTTGTAGTGGGTGGTTGTGTGGGTGCAGCACCTGGGGCTTGTGCTAAGCATG

AGCTAGCCAGAAGACCCAAGATCAGAAGAAGTTGTAAAGCACCAGAACCCATCTAGCTAT  
AGAGAAAATGAGAGACCAAAGAAAATGTTGTAGTGCTTGTGTGTGTAAGAGAAGAGAGAG  
AGAGAGAGTTTGAGCAGTGGAAGATGATAAGGGAACAGAATATATAAAAAGAGAGGTAG  
AGTATGTAAGTGGGGGGCTTCAAAGGCGTTAAAGGACAGCGCTGATTAATGCATCAATAA  
TGCTACAAGATTCCTCCAACCTCAATGTCTTAATTTAATTTGCTCCAATATTTTTTTTCA  
GAGAGATTACTACTGTACTCCAATCAACTAGATCAAATATTAATTTCTGTATAATTAAT  
GATTATCATTGATCCAATAAAATAAAATTATGTAG

>**Gmax\_MSTRG.47706.1** GeneID=Gmax\_MSTRG.47706;Strand=+;Pos=Chr09:40375297-40375880,  
CAAACCATAACAGCTGAAGGAATGGCAAGCCTCACAATGAGGGAATGTTATGCAGTGCC  
TCTTTGGAAAATCCTGTCCAAGATTTTGACATGAAGGAGAAAACATGACATAGAGTGAG  
AGTATAGTAACATTCAACCAATAAGATATAGAATTTGCTACAGCAGCTCCTCTGTTCCCA  
AGTCCAGACTTGAAAACCTAGAATCCAACATATAAGTACATGTAGTAATGTGGTAATTGCA  
GAGCTGCACATCATTGGGAATACAATATTTTGGGTTTGTAGAAATCTGTTGAGGCACTGT  
AGAAGGCCATAAGCAAAAAGGCTTGGAAGCATAAACCTAGCATAACTCCCGGCTTCTGCA  
GCTATTTCAAGATCCTGGCCAAGGAAAGTTAGAATGGACCTTGTGTTTGCCCAAATAATT  
GCAAGCGGAATGCTGACGATCATGAGAGTGAACATGGCTCTCTGCAAGTGTATGCCTAAC  
ATGTGATACTGCTTTGCTCCATATGACTGGCCACAAAACGTGTCCAAGGAACTTGCCATT  
CCTACCTATTTCAACCAAAAACCAACAAAGAAAAGAAAAAAA

>**Gmax\_MSTRG.46374.1** GeneID=Gmax\_MSTRG.46374;Strand=-;Pos=Chr09:18853354-18853738,  
ATGCACTCAGAGTTTACATACTACTAACAGTACGAAGAATAATCTTCTAAATACGACAAA  
ATATTACAATAAGCAGAGGATACATCATTAAACAGAGACCATACAGTAAACATAGGCCAA  
AAAAAAGAAAGATACTTTGAATATAACACTTGCAAGTGTAATGAACCCGTCCAATAT  
AATATATAATAAGACTATCACCATAGTTGTATAGTGCATAAATCATGTTTTGAATAAAGA  
CAACTGGTCCTAAATGGTGAAAAGTGATACAAAACATTTTCTGCTCAACAATGAAATTC  
TTTTGTTAGATGTCATCTCATCATCAAGACATTGAGCGGCCTCTGAGAAAACGCCATGGT  
CCCGTACCTGTTCCCATCCTGCATT

>**Gmax\_MSTRG.46907.1** GeneID=Gmax\_MSTRG.46907;Strand=-;Pos=Chr09:33360850-33361136,  
TGAAGTAGAAACATTTTATTTTAATTAACAATAAAGATAGTGTCAAAAATATATTAATA

AGTGTATTGTTATTTTTTGAAGAAAAACAAATTTTACTACCACAAAACCTGTCAGAC  
CACTAGATGTGTGGCCAAACAAACCAATTACCAAAAGAGATGCTGATTAAAAAGTGCAT  
TGTTAACATTGTTTTTTTTCTTCTCATTTCATGTAACATTTTCTGCCAAGTCTGAGCGG  
AAATTGTTAACGTTCCATATTCGCATGCGATGAGCAGTTTGCTCCAC

>**Gmax\_MSTRG.536.1** GeneID=Gmax\_MSTRG.536;Strand=-;Pos=Chr01:2550530-2550539,2601674-2602317,2684302-2684316,

AGCAGAAGAAGAAGAAAAAAGAAACCGCTACTCAACATGACCAGAGGATGAAATAAATC  
AAATAGATCCCGTCCGTCCGTGTGCGGAAAAGAAAGATCAAGGGCGGAAATGCCACCACG  
TGGGACGAATCAAAGACAATTGTTCTCATGAAAGATCTTAAGCCACCAAGGCCATGGCTA  
CGAAGGTTCCAGCGAGTGCAGAGGTAGCAATGAAGGCCTTGCTGGCGGAGAATGCAGCGG  
AGGGCGGTGGAGGCTCGGCGCTACCGGAGGGTCCGGGTGAGGGTCCTGGTGGAGTGTTAG  
GAGAGGTGGGGCTTGGTGTCACTGTAGGAGAAGGTGAAGGAGGAGAGGCTGCAGGAGAGG  
AAGCAGGTGTAGGTGCAGCCGTTGGTGGTGCTGGTGCTGGTGTGGTGTGCTGCTGGTG  
GTGGAGTTGCTGCTGGTGGTGGAGTTGCTGCTGGTGGTGGGGTTGCTGGTGGTGGGGTTG  
CTGGTGTGGTGGGTGCTGGTGCAGGTGCTGATCTGGGTGGTGGTGGTATGGGGTTGTAG  
TGGGTGGTTGTGACGGTGCAGCACCTGGTGCTTGGGCTAAGCATGAGCTAGCCAAGAGCC  
CCAAGATCAGAAACAGTTGCACAGCACCAAGAACCATATCTAGAGAGAAAGTAGTAGTAT  
TGGTGCTTG

>**Gmax\_MSTRG.65157.5** GeneID=Gmax\_MSTRG.65157;Strand=+;Pos=Chr12:38511645-38511775,38511902-38511961,38512040-38512167,38524216-38524226,

GGTTATTGGAACAAAAGGTGGTTGATGGGTAGGGGAAGGGGTTTTTGGAGGGTTTGGAGT  
GTAGGGAGGTTGAGAAATAGGAGAGGGAGTGTTTGGAGGGGTTGGGACATAAGGTTGGTT  
GCCAGGGGAAGGTGTTTTTGGAGGAGTGGGAACATTTGGAGGACTATAAGAAGGAGAAGG  
TGTTTTTGGAGGTGTTGGAACATTAGGAGGAGTATAAACAGGGGAAGGAGTTTGTGGAGG  
AGTTGGAATAAATGGAGGATGATTAGTAGGTGAAGGTGCTTTAGGAGGAACATAGGGAGG  
ACTGTGAATAGGAGAAGGTGGAGGAAGGAG

>**Gmax\_MSTRG.54535.1** GeneID=Gmax\_MSTRG.54535;Strand=-;Pos=Chr10:46171777-46172454,

TGGGACTACATGGCTTTTTTGCCTGTGTGGGGATGAAAGTATGATCTTACCATATAGAG  
AGGGAATCAACAGCAACCAATGCATTATCAAGGTTGCCAGCAAGAACTATAACGCTCATC



ATATACCAAACCTTCAAGGCAAAGCATTACAGCTGATGCAAGAGAGAGCCTAACAAAGGCC  
CAAATATCCTTAAAAGCCAGCCATGACAATCCAGTCCATCCATCCTTACACCAGATCACA  
ACATAAACAAAGTTGAGCCACTGTGATCCCCAGCTTGTGATATCAAACGCCAAAGCTGCA  
CCAGCTAAGCCAAAATCTAGCACATAAATTAAGAGCCAGAGCATCCCAATGTGCAGAATT  
AAAGCCACCAACCCAATCCATGCAATAATGTTAACCTTGCTCTGAGCTTGAAGGAACTTT  
TGCGTTGGAAAATTGAAGGGAAGTGAAAGAAATTGTGGAATTACTAAAATAGAGAAACTC  
CCTGCAAGATCAGCTATATCTTCTGTTGACCAAGAACTTCAAAATTGGACCAGCAAAA  
ATGTATATTGGCAAGAGCAAAATACTGGTCACGGATAATATCACCCATGAGCGTTGCATA  
TAAACACCAAGCATATTAACCTGCCCAGCTCCGAAAGCTTGTCCACAAAGCGTCTCAGTT  
GCACTTCCCATCCCAAGC

>**Gmax\_MSTRG.46906.1** GeneID=Gmax\_MSTRG.46906;Strand=-;Pos=Chr09:33358686-33358945,  
CTGACATGACCTGTGAAGCACTATTGAGAACCATGGTTACACCAAGAAGGTATGCTAAAT  
CAGCAACAGCTTGTATCATATCCTCACTATTGGTAAAGATAATGGCGAAGTCTTCTTTAG  
TCAAGAAAATAACATTCATGAAAAGAACACCAAGGAGGAGAGACTGGAACATGGTCACAC  
AGAAAGTGTATTTGGCTGCTCTTGGCTGCGACATGCCAAGCGCATTGGAGATGCGAACAC  
TTGGAGGGCATAGAACAAAT

>**Gmax\_MSTRG.104828.1** GeneID=Gmax\_MSTRG.104828;Strand=-;Pos=Chr20:39433098-39435386,  
ATTTACGTGAAAAATTTGTAACATTATTATTGTAGTTAAATTCCTCGATCCACCCATGTG  
ATCTAAAATTATATAAAAAAGAAAAAGTCATCCTCTGTCACTACCCTCTCCTTCCTATA  
CAGCTAAAGACAAAATTCCTGATAGATTTCTCTCTCCCTTTGTCTTGTTTGATTTTTC  
CCTTTTGGTTTTTGTTCCTGACCAACAAAAACCGAGATTACCAAAAAGTTGAAACCCACG  
ATTGTTTATCTTCATCTGAATCAGCTAATGATAATAAGAATCTTCCTTGATTTAGCTT  
TCGGTGGCTTCTCTGCACCAACCTCCTTGCTGTCATCAACAACAACACTGGTTAGTTTCT  
TTGCCCTTAGAGCCTCAGCATCCCAATCCGTTGACTCAGAACCACCAACATGGTCACTG  
CACAAGACCCCTGAGCCGCAAGTAACCCAAGCCACAACCCTTGAAAATCAAACCCTGCGA  
AAAAACCAAGCCAAACCGCCACAGGCATTCCCACAAGATAGAAACAACCTAAGTTAATGT  
TGGCACCAACTTTAGGCCTTGCTGTGCCTCTCAGCACTCCACACCCCGTTGTTTGAGGAC  
AGTTTCCGAGTTCGCAGAGTCCTATAACCGGTAGCACAAATGAGGTCAAAGTTATTATCT  
CCTTGTCTTGTGTGAACATGTTGGCCCAAATGTTCTAACCAGAATGGTGAAAACCAAAG

CGAAAAACACCTAACATGAAGCTGCAAGAGAGGCCAACTATGGAAGAAAATTTTGCCTTCG  
AGGGCTTTTGC GCGCCTAATTTGTTGCCAACTCTTGTGGACACGCTGAAGCTTATTGACG  
ATGGGAAAATGTAGAGCAAGGAAGTTGTTTGAATCAAATCCCCATGGAGGCCACGGTTG  
CTCTAGGATTCACCAACAACCCGCATAACAAAATCATGATCTCATACCACCACCATTCTA  
GGCACACGGAAATGCAGCTTGGGATAGCCAAATTGAGGAGCGATTTCATTGTGTAAAAC  
ACTCGAAAGAAAAGCCTCCCCATGTTTTCTTATGGGTGCCAGAGAAGACTATGTAGAGAA  
TCAAAGAAGCTACGAGGTTGAGGTTAGTCCAAACCCCGCTGAGAGCCACGCCTTTGATTC  
CCCAATTGAGGTGGGAAACGAGAAGGTAGTTGATAGGAATATGGAGGAGAATTGAGAAAG  
TGGCACAAGAGTGAGAGGCAGAGTAATGGATTGGCTTCGAAGGTAAATTCTTAAAGGGT  
GTAAAAAAGATTGTGCTAAGAGGTCAGGGATGGAATAAAGAAGATATGATTGGGCTTGTG  
TGGCGATAGCCTCGTCTTGGCCACATAATAGAAGGATATGCTTCATGTAGAGCCAAAGGA  
GAGAGATTGGGATACAAGTGAAGAGGAGCAAGAGAATGGTTCTTTGTAAGCAGAGGCCGA  
GGAGGGGAGAACTTTTTGGCACCGTAGGCTTGCCGCAAATGGATTCCATTCCGACGGCGA  
GGCCGGAGAGGATAGAGTAGCCGCTGATGTTGGCGAAGCCCACGGCGAGTGAGCCGCCGG  
CTAAGGCCAGCTCGCCGAGGCGGCCAGGAAGAGCATGGAGATCATGGAACGGCAGTAGA  
GCAAGAGACCGGTGAGGATCATGGGGAAGGCTATCTTGCATATTGAAATGAGTTCTTTCA  
AGACATGATGATGGGTTTGCATTGTTCTTGGGTCGTTTTTTCTTCATGGAGTGTTGTTA  
GTGTTACTGTTATGTCCTTTTGGATCAAGGGGTTGGTGATCATCATGTCTGCCTCTGGGG  
GTTTCATTGAAACTACATACTCCGGGTTTGAGTTGCATTTCAGGGGAGGTGGGAAGTTA  
TATGACACATATTTCTGCTTTTTGTGTGTGTGTGTGTCAAGAAAAGAGTGGTTTAGAGA  
ACACGTGAAAGTTGAACCGAGAAAGAAAGAGAGAGATAGAGAGGATTATAGGGTGAACGG  
GAGGGGGTTGAGCACAGGCTGTCTTGGGGCTTTTATAGGAGATTTTGGGTGGGAATATG  
GGCGTCAAATCTGTCCGAGAACATGTTTCGCTATGATGTATGATTTGTAGTTAATTATAT  
TTGTTAAGTATATAGTCAGGTATTGAATTTTATATCAGTTATTTGTTGAGAAAAGATGA  
ATTTTTTAAGAAGAGTCTATGTTTACTTAGGAATTAGTCTTCGACTTTTCACTAGAAGG  
ACCAAAAGATAAGTGAACACCCAACAAAATTCAAAAACAAAAAATTAGCACTTGACGCA  
CTTTTGGAG

>**Gmax\_MSTRG.10878.1** GeneID=Gmax\_MSTRG.10878;Strand=+;Pos=Chr03:548081-548619,

CATAACATGGCACCAGCTGAAAGGGACATCTTGACAACAGGCCAGAGGTCTTTGAATGCC  
AAAAATGTGAAACCTTTCCATGTATCAGAGCACCAACCACATGTGACAAATATGAGTTGA

CCAATATTAGGAATCCAGTATGCCAAGCCTGCTGAAATCATAGCACCAGGAATCCCAAAC  
TTGAACTTCATTGTCAAAAGCCAGGAGAGAAACACGTGAATGACTATCGAAAAAGCCGCC  
AAGAACGCAATGATGATGTTCTTGCTTTGAGATTGCAGGAACGTCTGGCAAGTGAACGAG  
ACAATGAAAGCAAACATGACAGGGATTGACCAAAGAGCAATGTTTCCTGCCACTTGTGCT  
ATGCTCTCATCTTGGCCCAAGAGCAACAAAATGGGGCTTGTGAAGATGAACACAGGAAGA  
AGACAGACTGCAGTTAAGAACAAAACCTATCCATGATCTTTGAAGATACACTCCCATCATG  
CCATATTCTTTTGCCCCATATGCTTGTCCACAAAGTGTTGACAACGCACTCGCCATTCC

>**Gmax\_MSTRG.95016.1** GeneID=Gmax\_MSTRG.95016;Strand=-;Pos=Chr18:49026223-49030293,

CCACACAGTACACACCTAACTTGAATAGCAACAATGGACAAATCAGAGTACCTACTCTTA  
CTTGCAATTGTAGCTACCTTTAGCAATGAAAAAATACAAAATTGTGCAATTTCTAATAAA  
TACAAATTTCCAACAAAAAACCAAAGGGCCAAAAAGACTAGCCTCTAGGCTGTAGGCTGG  
TCATTCAATAATTTTCTCCCTCTCTGTTCTATTGGTCATTCAATCTCTACTTGAATCAGC  
AAGATTTTGACAATCGGTTAGCAGTAATTGGCTGCGGCATTTCAATAATTTACTGTAGTC  
CTGCAGTGATACTGGATTCTCTTTCATGGATTTAGTGCACTCATATTAGAGATCTTGAG  
AATCATGTTCTGATCTAATCATTATGAAAATGGCTTTTTAACCTGAGGAGTGAATGTTGG  
AACTTCTGAGTACTACTGAACACATGACCTTGAATGCATGTTGGTCAATCTTCTGCTCCA  
TCTTTATACCAGAATGTATCCCAAGGCCCACTTTTGCTGCTCAACCTTAAGAAAAACAAA  
ATATTA ACTCAATAAAAAATCTTATGAAGAAAATTTTGATCATGTTATTCATAGAGTATCC  
TACCCCTCCCAATAAAATACCAAGATAAAAGAGAACAAATAATATGTGACTTGATGTCA  
AGTCACATTCATCCAACATGTCCTGTGTCAATTTGCCATTGTTCCGAGGTAGGATTTGAA  
TGAGTAGTGCAATGGGTAATAACACACCAACATGAAGTTTCCCAACTATCACCTTCCAAA  
TGAATTAAATACTTCACATCCAAAGTCCAGCTAGAACACGCAAAGCCATGAAGATAAACA  
ATCCAGTCCAGACTCCAGGAAGCCCTACTGGAGCCACCACCAGAAGGAAAGTTGAAGAAA  
CTAGTCCAATAACACCACCATAACAAAAACCAAAGAAAAAAGGGCACGAGGAAATGA  
GTTAAGAGGAAAGAATCATATGGCATGTTTAACTATCTTTCAACCATGGTAGGAAATTAC  
CATCGAGTAAGCAGCATAACCAAAGTCTGATACCCCGTAATAAATCCCATCAATAACAAA  
TGCCAAAGCATTCACTGGTTGAGATCCAGCAACAACTGCACATGTAAATAAATTTCAGA  
CATTCCAATTGACGTTACTGTGTATACATGCTTCCACAGAAAGAATGGAGAATTGCACTG  
CATATAATGAACCTTATCAGCCCTACTAAAAGGTTACCATGGCTTAAACACCCATCAAG  
AACAAAAATTCTGATACTGTCAAAAAATATTAGCTTTCAATGTATTAATCAACATTAGAG

GAAGAACAGACAGACAAAAAAAATATAAACAGACATCCAAATGAAATGCTTTCTTTTA  
CTTTCTTGAGCGAACTCCTTTCCTGGTAAATGCACTATAATAGTTTCAAACAAAAGGATT  
TCAATTTGGAGTTGGTACTCATGACTTGGCCACTCAGACCCAATTCTGCACAGGCTAATA  
CTTTCAAACAAAAGGATTTTCAGTTTGGAGTTGGTACTCATGACTTGGCCACTCAGACCCA  
CTTCTGCACAGGCTAATACTTTCAAACAAAAGGATTTTCAGTTTGGAGTTGGTACTCATGA  
CTTGGCCACTCAGACCCACTTCTGCACAGGCTAATACTTTCAAACAAAAGGATTTTCAGTT  
TGGAGTTGGTACTCATAACTTGGCCACTCAGACCCACTTCTGCACAGGCTGAGTGTCTGA  
CTCTTAAAGTCAATCCAAGTCAACTAGGGAGTGGCATATAAAGCCTACAAAATGATAATA  
AAGGTAATTTTCTGCAAACAACTGTGATTTCTTACCCATATACCTGACCGAGCAACATCC  
AGAACTTCAGAACTGTGCTAAATAAACTAGAAAATGCTCCAAACCCAAAGAATAAGATC  
ATTGACAAAGTGATTCTGCTCCTAAACCAATCTGTTTAAACATGTAAAAGAGAGTACCAG  
AAAAGAATTCGGGGTCAGTATAAGTTCCAATCTCACTAACAGAAGGTATGAAGGAAGAAG  
AAAGCAATTTATGGTGACAACCTGCATCACTCTAAATATGACAAGGCTTGCTTGCTCATA  
ATTTCCAGGGAGTAATTACAGGCAAGAAGTGCCTGTAAAAGAAATGTCATTTTAAACAG  
ATACAGTAAGTTTCAGCCAAATTAATTTGATAGGACACCGGTGAATAATACTGATATTCA  
TATTGGTGAGGAGTCATAGGCCACTATATGGAAAGTTTATTCTAGGAGAAAGAAAAT  
AGGATTAGGGAGTGCGAGTTAGTTACATGACGTGGCATAGTAGATTCTAACAAATTCTGT  
TAGGGGATGGAGTATGTAAGGAGGTGAGGAGAGAGAAAAAAGGGAAGGGGGAATGGTGGT  
TGTTTAGGGGAATATTTCTCTGGAGAAGGAGTCACAGACTCTGGTTGTCATTCTCAATTC  
CTGTACTAGCTTTCTGCTATCTTTCATATTAAATAACACTGTTATATTGAATTTCTGTTT  
TTCATAACACCGTGACCGTGAGTTCTAACATAATTTCAAAGACCTAATAATTTTGAAATA  
GTTAGTTTGTTTCATATCTTCAAATAATAGATCATATCATCTGTACCATTGAACTGCA  
TGATACAGAGTCAATTCTTCCAATCTTGGCAAATGTTTCTTTTTGGGCCACATTGGAGG  
ATATGGTACAATATTTGAATTCTTATTTCTTACTAATACCATTTCAGTATCTTGGGAAAT  
GGAAAAGTATCAAGCTTATCATGTAAAATGGAATGCCCCCTGCTGGACGGTCCCACATCG  
TCTGCCTCAATTCCTGGGGTGTAACCTATATATTTGTTGGTCAACTTCACTTAATGTCAA  
TTGGTTTTAAGATAAGATTTAACATGATATCAAAGCCTATATCCCATCTTGGTCAATCGC  
CTGTTCTGGTAGGCTTGTTTGTCTGACAGGCATTTGTGAAGGGAGGGGTGTTGCAAGGT  
CCCACATCGCCTGCTTCAATTCTTGGTGTAAGCATCATTGAGCAAAGAAACAGACAACCA  
AACTTGCATGCAAATTTGATGACCTGCCATAGGTGGTATAGGGCCCTGCTGAGCTGCCAC  
AGATGTTGACAGCATCACAGTTATAAACACAGCCAAAGTCCTAGCAGAAACAAGACCACC

CACAAAGTGCAATAGTTAAAAAGGAAAGATTAATCTGCATCGCACCTTAACTCACATAAT  
GTATTCTGCCTAGTAATAGAAGCAATTAACCAAACAAAACATTTTCAAGTTAATGAAATT  
CATATTTTATTCTCAAAATACAAAACATTTTAGGAATAGGGGGAGGGGGGATGTTAGGG  
ATGTCTTTAAAACTTCAGCTATTGGGATAGCTGGTTCAAGACACAGTAAAATCCAATTT  
GAATCAAAAAGTAAAGTCTCTCCAGAGTTTCAAGCATAGGACAGAATCAAATGAAAAAT  
AATAAATAAATAAATAAACTTAAAGCACAAAATCAACAGAAACCAAATGTTATGCAAT  
CCACATATTCACACTTAGGTCATTAATTCTCAAGAAAAGGTATTGTTTGAGATACTCAGT  
TGAGTTAAATTTTCTATCCACAATCATGCACAGATGAAGCTGAATTTGCTATCCACAATC  
ATGAATAGATGAAGCTTGTCTAAGAAAATTTCAATGACATACTGCAGAACTTGCAATCA  
TCTTTCCAATCTACTCCAATCATTTTCATCATCATTACCAATTTTCATTGAAGGGAAGGGA  
AAGGCAAAGCAACAATTCACTTAATTGTGCATACCAGATTTGAGATAGCTGAAAAATTT  
TCTCCATAAAATTCGGAAGGGATTAGCAGCACTTTGTCACTCAATTTCCATAGCAGAAT  
GAAAGCTATTAAATATCTGGTGAACACAAAGACAACTCTGTTGAAAGCAGATCACATGA  
ATTAAGGGATGTGTGCAGAATGCACAGATAATACTAAGTTTAACACATCATTGACATACT  
CAGAGATCAAAGTAGCAACTGTAGCACCACCAAGACCAAAAAGAAATATTA

>**Gmax\_MSTRG.56420.1** GeneID=Gmax\_MSTRG.56420;Strand=+;Pos=Chr11:1868428-1871028,

CCGTGATAAGGTCGAGAGTCAAGTGATTTAATTAGAACTGCCATAATCATGTCCATATAA  
TTAATAAATGAAACAGAAACAGAAACAAAAACGCATTCCTTTGTGTTTTTCTTTCTTTG  
TATGAATGCATGCGTCTATGCTCTGCCTCTTTAAATAGCACAACTAGAAAGAATCAA  
TTTGATGCAAAAAATATAAAAGAATGGAGGTGACGTCGTTGTGATGATCAATCAAATAA  
TAATGAATCAGAGCAATATTCCTTGGTAGCGCAGGAACTGAAGAAGCAATTCTGATCTTG  
TTCCTCAGACGATGATGTGAGTTCTTTGGCTCTTTGAACTTGGCCCTCCCAATTGGTGCG  
AGCCAACACAATTAACATGGTGAACATACAAGAGGCTTGGGCGGCCAATAAACCAAGCCA  
CAAGCCTTTGAAATCAAAGCCGGCAAAGAACTCAACCTCACCGCAACGGGCATTCCCAC  
TAGATAGAAGCAACCCAAATTTATATTCGCTCCCACTTGGGCCTCGCGGTTCCCCTCAA  
AACGCCACAAACCGTTGTTTGC GGACAGTTTCCAATTCGCAGAGCCCAATGATGGGCAA  
CACCATCGACGTCAAAGCAATGATCTCCGCGTCACGTGTGAACATCGAAGCCACGCTTG  
CCTCACCGAAACGGCGAAAAATAATGCCGAGAAACCCAAACCGTAACTGATACATAACCC  
CACCAGTGCTGCGACTTTTGCCTTTTTGGGATTCTCCGCACCCAGTTCATTTCCGACACG  
TGTGGAAACCGCAAAGCTCAGGGAAGATGGGAAAATGTATATCAGAGCAGTGGTTTGTAT

CAGAACCCCCATTGATGCAACCGTTGCTTGGGGATTAATCAATAACCCGCAAAGTAAAAT  
CATGATTTTCGTACCACCACCACTCGAGGCATACGGAAATGCAACTTGGAATTGCCAAATT  
CAAAAGCGATTTCACACCGCTCAAGATGCCCTTCAACGAAACACCTGGCCATGTTTTTTT  
GTATACGCCGGAGACCCATATGTAGAGAATCAACGAAACAACGAGGTTAAAATTCGTCCA  
AACAGCGCCTAAGGCAATGCCTTTGATTCCAAGCTTAAGCACAGAGACGAGAAAAGTAGTT  
GATGGGTACGTGAAGGAGAATAGACAGAGATGCGGTGTATGTGAGAGGTAGGGTTATAGA  
TTGACTTCGTAAGTAGATTCTCAAAGGGTGTAGCAATGATTGTGCTACAAGATCGGGAAT  
AGAAAATAGTATGAAAGATTGAGCTTCGGTGGCGATGTCTTCTTGTGGCCACATAGGAT  
CAATAATTTCTTCATGTTGAGCCACAAGAATGAAATCAAACTGAAGTTAGAAGAAGCAA  
GACGATTGTCCTCTGCATAGCGAGACCCAAAAGTTTGAACCTTTTGGCCCCAAAAGCCTG  
GCCGCAAATGGGCTCCATGCCATGGCGAGGCCCCGAGAGAATAGAATAGCCCGTGATGTT  
GGCGAATCCAATGGCGAGAGAGCCACCAGCTAAGGCAAGCTCACCCACACGACCGAGGAA  
GAGCATGGAGATTACGGAGCGAGAATAGAGTAATAACCCGGTTAGCACCATGGGTAATGC  
TATGTTGGCTATGCATTTGACTTCGTTGAGAGCGAGGGAAAAATGGGTTTTAGTTTGATG  
GTTATTTTGGCCTTGTTTGAATAATGTTGTTGGGGTTTGGGGATCAAAAGGGGGAGCAT  
GTGAGCTGGCTCCTCATGAATTTTGGTTGTGGGCATGTTTGATGGCCCTCATTGCTATC  
ACACAAAGTGGAGGGAGATGACGATAACTGGCACATGGCTTGACGGAGACAGAGATATT  
TAGCTAGGGAGTACTAAGTGTTTGTGTGTAAGTCACAGAGAAAATCTTGGTTGGTTTGGG  
GATTTGCATTTTGAAGAGTGTGTGAGGAGAGGTATTTAAAAGAGATTCTTGGACGTATC  
TGAATTTATTTATTATGGAGTATCCGGGACGGCCACTAATGGAAATGGAAAGATAGGGTT  
GACAGAGTATTGGCGTTTCCGAGTAGTACCAACTCAAACGCCCCCTCCTCATAATTTTAA  
TTTTATTTTAAAAGAAAGCTAATATTCAAAGCGTATTTTTACGACCGTCTAATATCGTTA  
GTGCAGGGATTATTAGTGGACTTGGACGTAATGTATACTACTATAATCCATATAGAAGAG  
CCTTGTAGGAAGGAATTACCAATTCAAACGAATAAAGGTCAAAGTCTAGTAATTCCATT  
CCATAGTATATTTAACTCCTCCGCTTAATTTGTTGTGTAACTCACATTGCTTTATATTA  
AATTCATGAACTGGCCAATAGCATGAAGAACGTGTTAGGATTTGATGTATCCGTACCAAG  
AGGCAGAATTGAGTTTTGAAGGCTTTCACTTTATGAGGAGAGGACCCATTATGAAAGCGG  
CACCTTGACTTACTCTTCTAAGTTGAGAGTTTAATTTGGGTCCTTTATCTTTAAACTA  
GCTCGTGTGAAAAAAATGCCATGTCGGCATTGTTGATATGTAATGGGATTTAAATTAAT  
CCACTTTGTTTTAAACCCGTG

>**Gmax\_MSTRG.65157.1** GeneID=Gmax\_MSTRG.65157;Strand=+;Pos=Chr12:38510854-38511494,38512270-38512501,

TCGAGCAACAAGGAATGAATTGATGGTAATTACTACAACCTCACATTGGTAACCATAGATA  
CACAGATTATACTACAACATAAAAATTAATTATGAGACACGATCTCATCTGTCCAAAATAA  
CAATATTAGCAAAAAAATGAAAATGTTCAACAATTACTATATACTATAACTCAAGTTCCA  
AAAAACAAAAGTTTGATTTTTCTAACCAAGAATGGTGCTTAGAGCAGCACCAGCCAGAAT  
GGTCAGTGAATACAGCCCTAACCTCGACGGTGCTACAGACGACGCGCCGTTTGGTCTGGC  
TGGCGTCGTTTCGTTTCGACGCCCCGACGACGACGACGACGACGGTGAGGGAGTTGTTGC  
TGCCGGAGAAATGGTGGGAGTGGTGGCTGACGTCGACGGGGATGGTGGCGATGTTGCCGG  
AGCCAGGTAGGAAGGTGGGTAAGTGGGTGCAGATGAAGGTGAAGGTGAAGGTGGGTAAGA  
TGGAGAGAGTGAGGTTGAGGGAGGGATGGTGGATGGATAGGGTGGTTGAGATGTTGGGGA  
AAGAGTGTGGAGGTGTCGAATAGAAGGAGGTTGGGAAATGGGAGAAGGAGGTGTGGG  
GATGTAAGGTGGTTGAGATGTTGGAGATGGGGTTTTTGGAGGGAGTGTGGAGGTGTTG  
GAGGATAATAAGGAGGTGGCTCTCTCACAGCCAACACCACAATAATCAATTTCTGACCCT  
TTTCACAATTACCATCTTTCCCACTAATGAAGTAAAATGGACCCGATCGATCAAACCTGAA  
ACTCCGATTCACTATCCTCAAACCTTCTTGATCGGGTTCTTCTTGTTACATTTCTCATAAT  
CATCCTTGTTCAACCAACACAGTATCCGAGC

>**Gmax\_MSTRG.70935.1** GeneID=Gmax\_MSTRG.70935;Strand=-;Pos=Chr13:37706536-37706727,37707123-37707391,

AAATTTTCCTAGCATATTGCATCATTGTAAAGTAGCTAGCACCAATCTTATTATAAAAC  
TCAACAATATTGCTTATCATACATGATAATTCATTTCACTACATTCCTAAAGAAATTCTG  
AATATAATTTACCATGACAGCCAAACCAAGTGACAGAAAACCAAGAGTTTGCAAGAGTAGC  
ACCAGCAAGCTGAAGATCACCAAGGTGGCCAGCGAAAATTACAGAAACCAACACGATTAA  
GTAATAGAACAAGTTTGTAAGGAACATAGGTAGTGAAAAAAGTAATTGATGTTTGGCCTC  
CTCCAAATCCAGGATTTTGCTGTTCCACCATCGGTACTGTCTTGTTTCTTTATGATG  
AGATACATCTAATAGAGGTGTGAAGTGTGTTACTGTGCCATCTAAACCTGCTTTTCAG  
CATCTTCTATAATCTCTTTGCTCCTATTTCTATGTTCAAT

>**Gmax\_MSTRG.64519.1** GeneID=Gmax\_MSTRG.64519;Strand=-;Pos=Chr12:35571070-35571542,

CTTTTCTTCTACTTCAAATTGCTGCTTAGACAACCTAGAATTAATCCTTGGCAGTTTTA  
ATTTTAATTCCTACCTCATAATGGAACAACGAAGTGTTAACTACCTTGTTGAATCTC

TAGAATTAGTCCTTATAAATTGGTTTCAATAAAAAATAATAAAAGAGAATATTATGTC  
TCTCTTGCTCTCCTACATAAACAAGTTGTTCTTCAATTTAGTAGTGGTTCCTTCTGTCC  
TCCCATTGGTGCAGCCTCTTGGCTGCTTCTCTACCTACAATGAAGAAAATTCTCATTAG  
ACAGAAAAATTAACCTCCCCATTGCATGCATAGTTTTACGGAAATAAATTATTGCAGCTA  
TGGTTTTTTACCTCCTTAGTCCAATCCGTTCTAAATGTGACCCACAGTAGAATAATTGTT  
TGCATAACGGTGCCACCTAGCATTCCCAGCCATATTCCCTGCCACAAAAAAGC

>**Gmax\_MSTRG.10873.1** GeneID=Gmax\_MSTRG.10873;Strand=+;Pos=Chr03:508607-509036,

CAGAATTCCATTGGCAAAGCGTATGAGAACAGTGAACACAAGAGCATAAGCAGCAAGTTC  
CCTTGAACCAATATGACCAATAAATGCTTGGCTTATAACATTGATACCAAAGGTGGAGAA  
CCTTGTA AAAATGCCTGGTGCTGCCACTACCCACATCACCTTGCTCTCATTCCACACCCT  
CTTCACCAATGATAATTCCTCTTCTTCTGTTCTGATGTTTTTTTCTCTTTGATCAACAA  
CTTCTCCTTCACACCCCCCTGCATTTCTCTATTTTTTTTTTTTTTTTGCTTGCTAGTAG  
AAGGAAGAACA AACTAAGCAAGTGATGAGGGAGTGTAGGCCTGAATTTTTTTCTATTTTA  
AACCAAAAAAAGGTGTTGGCATGGCTTTAATTAATACAATAAAAAATAAATTACTCGCGGT  
GGTTGCATGC

>**Gmax\_MSTRG.79338.1** GeneID=Gmax\_MSTRG.79338;Strand=+;Pos=Chr15:8401984-8402209,

GTTTCCGAGGTGGCCGGCGAAGGCGCGAGTAACGTTGGACATGAGGTTGTTGAAGACGTA  
AACGAGGATGGCGGGAGCGGCGAGGGGGAAGAGGAGGTTGAGTTCGATCCATGTGGCGGA  
GAGGATGCGCTTGACCAGGGTAGGGTGGGGTCAGAGAGGACCTCTTCGAGACGGGAATC  
AGCAGAGTGATGATGATGATGCGTTGAGTTTATCAAGGGTTGGCGT

>**Gmax\_MSTRG.27311.1** GeneID=Gmax\_MSTRG.27311;Strand=-;Pos=Chr06:7114702-7115046,

AGGGGACTAGCTAAAAGAAAGAAAAGTAAGCGATGTGGGACAAATAAATAACGGGGAAAT  
GAAATAAATATTCCTTTTTCTCTACAGTACAATCCAAACCCAAGCAATCTCATTTGGAAG  
TGTGTATAATGAGAGGGTCTGTTTCAAGAGAAGGTGTCTTGGTAATAATCTCATCATGAT  
GATCCTCCGTGTCCATGACAAGAATCTCTGGAAGACGAACATTGTTACACTCCGTAGTAG  
GTAATTTGGAAGGAGCAGAATTAGCATTAGTAAGCTCGTTGGCCCTTGCACCTGGGCGT  
TCCAGTCAGTGGTGCAGAGAACGAATATCATGAGAGCAGCACATG



>**Gmax\_MSTRG.34861.1** GeneID=Gmax\_MSTRG.34861;Strand=-;Pos=Chr07:19197000-19197256,19198043-19200043,

TTAACAACAAATACCAGACTATAAATTACTGAATAAATAATGTTAATTGCGTTAAGATTA  
ATGCTAACCATTAAACGTAAAAAACTATTAATAAATTGTAATTACTACACAGTACACACCT  
AACTAACTTGAATAGCTGCAATGGACAAGTCAGAGTACTTATTCTTACATGCATTGCAGC  
TACCTTTAGCAATGAAAATATACAAAATTGTGCAATTCCTAATAAATACAAATTTCCAA  
CAAAAAACAGAGGGTCAAAAAGACTACCCTCTAAGCTGTAGGCTGGTCATTCAATAATTT  
TCTCCCTCCCTGTTCTATTGGCCATTCAATCAATACTTGAATCAGCAAGATTTTGGCAAT  
CGGTTAGCAGTAATTGGCTGCTACATTTCAATAATTTACTATAGTCCTGCAGTGATACTG  
GATTCTCTTTGCAGGAATTTAGTGCCCTCATATAAGAGAGCTCTTGAGAGAATCATTTTC  
TGATCATTCTGAAAATGGTTTTTAACCTGAGGAGTGAATGTTGGAATTCTGAGTACTG  
AATGCATGTTGGTCAATCTTCTGCTCCATCTCTATACCAGATTGTATCCCAAGGCCCACT  
TTTACTGCTCAACCTTAAGAAAACAAAAATATTAACCTCAATATAAATCTTATGAAGAAAA  
TTTTGATCATGTTATCCATAGAGTATCCTGCCCCTACCCAATAAAATACCGACATAAAAG  
AGAACAATAACATGCGACTTGATGTCATGTTACATTCATCCAACATGTCCTGTATCATT  
TTGCCATTGTTCTTTGAGCTAGGATTTGAATGAGTACGACAATGGGTAATAATACACAAA  
CATGAAGTTTCACAATTATCACCTTCCATATTAATTAATACTTCACCTCCAAACTCCAG  
CTAGAACACGCAAAGCCATGAAAATAAACAATCCAGTCCAGACTCCAGGAAGCCCTACTG  
GAGCCGCCACCAGAAGGAAAGTTGAAGAACTAGTCCAACCTAGAACCTACCCATAACAAA  
AGCCAAAAGAAAAAAAAGAGCACGAAATAATGAGTTAAGAGGGAAAAATAATATGGAATG  
TTTAACTATCTTTCAACCATTGTAGGAACTTACCATCGAGTAAGCAGCATATCCAAAGTC  
TGATACCCCATATAAATCCCATCAATAACAAATGCCAAAGCATTCACTGGTTGAGATCC  
AGCAACAACTGCACATGTAAATAAATTTAGATATTCCAATAGAGGTTACTATTTACAC  
ATGCTTCCACAGAAAGTATGGAGAACTGCACTTGCATATAATGAACATTTATTAGCCCTA  
CTAAAAGGTTACCATGGCTTAAACACCCATCAAGCACAAAAATTCTGATACTATCCAAAA  
ACATTAGCTTTCAATGTATTCATCCACATTAGAGGAAGGACAGACAGAAAAAACAACAT  
AAACAGACATCCAAATGAAATGCATTCTTCTACTTTCTTGAACGAACTCCTTTCCTGGTA  
AATGCACTATAATACTTTTCAACACATGAATTTTAATTTGGAGTTGGTACTCATGACTTA  
GCACTCAGACCCACTTCAGCACAGGCTGAGTGTCTGATTCTTAAAGTCAATCCAAGTCA  
ACTAGGGAGTGGCATATAAAGCTTACAAAATGACAATAAAGGTAATTTTCTGCAACAAC  
TCTGATTTCTTACCCATATACCTGACCAAGCAACATCCAGAACTTCAGAATCTGTGCTAA

ATAAACTAGAAAACGCTCCAAACCCAAAGAATAAGATTATTGACAAAGTGATTCCTGCTC  
CTAAACCAATCTGTTTAACATGCAAAAGAGAGTAGGAGAAAAGAATTCTGGGTCAGTATA  
AGTTCCAATCTCACTAAATGAAGGTACGGGGAATGAAGAGAGCAATTTATGGTGACAACC  
TGTATCACTCTATATATAACAAGGCGTGCTTGCTCATAGTTTCCCAGGGAGTAATTACGG  
GCAAGAAGTGCCTGTAAAAGACCAGCAAGCGCCAAAGCATCATTGAGCAAAGAAACCGAC  
AACCAGACTTGCAATTTGATGGCCTGCCATAGGTATAGGGCCCTGCTGAGCTGCC  
ACGGATGTTGACAGTGTACAGTTATAAACACAGCCAAAGTCCTAGCAGAAACAAGACCA  
CCTACAAAATGCAATAGTTAAATTAGTTATAAAGTAAAGATTAATCTGGCATTGCTCCTT  
AACTCGCATAATGTATTCTGTCTAGTCATAGAAGCAGT

>**Gmax\_MSTRG.55222.1** GeneID=Gmax\_MSTRG.55222;Strand=-;Pos=Chr10:49055328-49055865,

AGAATAATCACCAAACCATTACTGCTGAAGGGATAGCGAAACGAAAGAACTCCACATTC  
CTTTGAACAGCTCCATAGAAATCGGTGCGCGGGTTTTTGCACATGCAGAAGAGTATCTCA  
TGTATAACACAAGAAAAATCACATTTGACCATATTGAAATGCTCACAGCCAATGCTCCAC  
CAACATTACTCAGACTTGTCTTGAATACCAAGGCCCAACAAAGAGGTACATGAATAATGA  
GTGTGACACAAGAACTTGCAAACATGGGAAGAAGCAAACCTTTGGATTTGGAAATATCGAA  
CTAACGGCTGTAGAATTGCATATGCAAAAAGTGCTGGAACAAGCCAAATTGTGAACTTCC  
CTGCTTCATGGGAAATTAGAGGGTCCTGGCCTATGAAAAGTAGTATGGTTTCCATGTTGA  
TCCAAAGGAGAGACACCGGAATAGAAACCAAAATGAGAGAGAATATAGCAGTGTATGTTT  
GTATTCCAATTCTTTGATATTGTTGGCCTCCATAAGCCTGTCCACAAATTGTTTCCAG

>**Gmax\_MSTRG.104177.3** GeneID=Gmax\_MSTRG.104177;Strand=+;Pos=Chr20:36605682-  
36605828,36608596-36609241,

AAATACCTTGGAATGAATGAGAAAGAAGCAGAACAATTATCGCCATTCCTTATTTTACTG  
CATTAGCTTAGTTACCTTAGTATAGCAATCCTAACAGTTCTTGCCTCAAATTTTCTTTT  
CAGGAATATTCGATGGATTTTGCACATTAGTAGGTCTCAAAGCTTAAGAAGAAAGCAGTG  
AGATGGGAAAGGAAGAGACTTACAATAAGACTGAAGCCAGAGACAGCACAGAGAGAGATG  
GCAATGGCTGTGCTAGAGAGAGCAAGCTTACCCAAGTGACCAACCATCATCATTGAAATA  
ATCTGTAGAAAATACTGTGACAAAGTCACAGTAATCATAGGAGCTGCTAGATAACCCACT  
CTTTTCATTCCTGAGAAAAGACAGTCCATGTTATGGCTGAAGCTGAAGGATTCTCCGGC  
TCTGAGTCCTTATCTAAGAGACTATTTTCCATATCCTCTCCAAAGGGTCACAGAATCACT

GCACCTTGTCGAAACTGGTAGAAATAATGGCAGGGCTTTGGTGTTTTGTATGCTAAAAGG  
TTTAAATATTTACAAGTGGCAGCAGCAGTAGTTCTTCCAAGGTTTAAATATTTGTTTCAA  
TAATGACTGTCTCAGAGTCTCTCATGGGCTTCCCCCTTTATGTAGACGGAACAATATTT  
CAAGTAAATTTTAAAATTTAAAATCATTCCATCTAATCTAATTTAATCTAAATTTTAATT  
TTGATTTCTTATAATTTTAAATCTACAATTTTAAATTTTTTATTTTAAATTAAGACAAT  
TTAGTCAGAACAG

>**Gmax\_MSTRG.104177.9** GeneID=Gmax\_MSTRG.104177;Strand=+;Pos=Chr20:36605722-  
36605828,36606791-36608312,36608599-36609101,

GCCATTTCTTATTTTACTGCATTAGCTTAGTTACCTTAGTATAGCAATCCTAACAGTTC  
TTGCCTCAAATTTTTCTTTTCAGGAATATTCGATGGATTTTGACATACTGTGCCAAGTG  
CAGAGCCATAAAGACTTGGAAGTGGAGGCCAACCTGTTTTTCCCAGTTTGTACAACCTGT  
GATGAGAGATAGCATAATTGTTTGGCAGAAGGCACCAGTCAGTATTCCAATCCAAAGGCC  
TTTTCTCTTAATTGTAGCCAGAAACCCAATATGGCAGCCATTGGAATCCCACAACATA  
ATAAGCTCAAAGGTTTACATATGCTCCTATGTGCTGCCACCCACATCCTCTAGCAATACC  
TATAATGAAGGCATAACTCAGATTCCATTGCTTAAGAAGAGTAATGTGCATTGAAAAATA  
GTTCAAACAAGAACTAACCTGAAAGGGTACCGTGTAACGTGTCTACTATAACAGATATAC  
TTAAAGAGGAACCATATCTGTGACATAATCCACCACATCCTGCTCATTGCTAAATACAT  
AACCTAAAACCTGCCTGCTAGCAAAAATGATTGAGCTCACCAGAATGGCCTCAGAACTG  
CTAGAGTCATGGCAGCAGAAACAGATACTCGTGCTGATTGTGGACTTCCAGCTCCTAATG  
CATTTGAAACTCTAGTGCTGAACAACCCGCCAAAAGAGAAACCAATCAGAAAGAGGAAA  
AAATTCATTTACTATAATATCATTCTACATGAATACGAATATGCACAAATTGATGAGCTT  
AGGACTTGTGTGAATCAAAACCTTGCTGCTGAGCCAATTGCTTCTGGGATTGTGTAGATA  
GTTGTGATGATGGATAAACTGGTCAGAACATAGTTAACAATAACAACAAATTAGCAACAC  
TTGCATGAATGGAAATCAAATTTGGCTGAGTAACAATTTCAACACAGATTTTAAACAC  
AAAGCCATTCATGTCTGAAGGACTAGGATAAGTTGTACATACCATATGGATAAGACTGAA  
GTTTCAAGCTCTGGATTTGGTAGAAGACCAGAAAGCAAGGTTAGCAGCTCAAATGACCAC  
CACTCAAGGCTGCAACGATCAAATAAGTAAGAAACATACCATGGTTGAAAATTAATGGG  
AAATAAAAAACACAACACAAAAGATAAAATATAAGAGGAAGAACTCACCAAACCATTTCCA  
GCTGAAGGAATAGCATAGGTGAAGAATTCACCAATCCCATGGAATAGTTCCATTGAAATT  
GGGACTCGAGTCCTTTCACATTCAGTAGAGAATTTTATATATAAGCCAAGTAAATCACA

TTCAGCCAGTATGAAGTACCAATTGAAAATGCTGCTCCCAAGTTACCAAATCCAGATTTA  
AAGACCATTAACCAACTGAAAGCCACATGGAAGCAAAGAGTAATGGAGGAACTTATGACA  
AGGGGACTGATCAAACCTTTCATCAAAAAGAATCGAATCAAGGCCTGAAGTGTTGCATAA  
GCAAAGAGAGCAGGGATCATGCACAAAGCAAATTTTCCAGCTTCTTGTGAAATCGAAGGG  
TCTTGGCCAAGAAATATGAGTATCTTCTCCAAGTAGACCCAGAAAAGAGTCAGAGGAAGA  
CAAGCTAAATAGGTCTCAAAGCTTAAGAAGAAAGCAGTGAGATGGGAAAGGAAGAGACTT  
ACAATAAGACTGAAGCCAGAGACAGCACAGAGAGAGATGGCAATGGCTGTGCTAGAGAGA  
GCAAGCTTACCCAAGTGACCAACCATCATCATTGAAATAATCTGTAGAAAATACTGTGAC  
AAAGTCACAGTAATCATAGGAGCTGCTAGATAACCCACTCTTTTCATTCCTGAGAAAAG  
ACAGTCCATGTTATGGCTGAAGCTGAAGGATTCTCCGGCTCTGAGTCCTTATCTAAGAGA  
CTATTTTCCATATCCTCTCCAAAGGGTCACAGAATCACTGCACCTTGTCGAAACTGGTAG  
AAATAATGGCAGGGCTTTGGTGTTTTGTATGCTAAAAGGTTTAAATATTTACAAGTGGCA  
GCAGCAGTAGTTCTTCCAAGGTTTAAATATTTGTTTCAATAATGACTGTCTCAGAGTCTC  
TCATGGGCTTCCCCCTCTTATGTAGACGGAAC

>**Gmax\_MSTRG.96651.1** GeneID=Gmax\_MSTRG.96651;Strand=-;Pos=Chr18:57124296-57124508,  
AGAAACATTGGTGAGAGAGATTGCAATAGCAACACTTGAAAGAGAGAGCTGGTTAAGATG  
GCCAACCATTAACCAATGACACCACTTGCAAAAGATATTGCAACACACTTGCAACCACCAT  
TGGAGCTGCTATAGTACCCACCTTCTTCAGCTCTTCCCTCATTGCTCTCCTCCTTTTCAT  
CCATCCCCACTTTCCTGTCTCTGAACCTTCTTC

>**Gmax\_MSTRG.55226.1** GeneID=Gmax\_MSTRG.55226;Strand=-;Pos=Chr10:49060244-49061429,  
TTGCATTTTAAGTGGGAGTACTCTAATTTTTCATTGCTATATACAAGGATGTTATTGGAA  
ATTGAAGTGCTGCTCGTGAATTAATCCAATTGCTTTTACTTCACGTTACAGAACCTTAAC  
CAAAATTGGATTGAGAAAAAAGAACAAATCAATATCATTACAAATGTCTTGTCATGAGAA  
CCTTTTCCTCCTCTAACTCTAAAATTTGATCTTTTCTGCCACCAAAGCTAAACGATTTAC  
CAATACCAACAAAAGAAGCTGACAGATTTAAGGAATCTTCTCCATTTGCTAAAACTAATC  
CATCTTCTACAGCAAAATTTCTCTGAAATATCCTTTCCCATGCTTTAATTGCCTTTCTCA  
GGACACTTGAGCAATGAGTACATTTTCAGTCAGTAGTACATGTGTTCTCTAAAAAACAGG  
CTAGTAGTGCATGTCCAAAACCTGAATCTTAATAAGATTGCATGAGTTAAGATACTACTTT  
TCTTTGACTGTCAAAACAATTTCTCTAGTTTAAACATTCAATTCAAAGGGTTTGGTTTGA

TATATGAGAAAATATAACATTGTGAACATGGTGTTTTAGGACTGTGCCAAGTGCAAAGCA  
TGGACTTGGAAGTGGAGGCCAAACCTGTTTTCCAGTTTGTACAACCTGTAATGAGGGAT  
ACCATAACTGTTTGGCAGAAGGCACCAGTCAGTATTCCAATCCAAAGGCCTTTTCCTCTT  
AATTGTAGGCAGAAACCCAATATAGCAGCAATTGGAATTCCCACAACATAATAAGCGTCA  
AGGTTTACATATGCTCCTCTGTGCTGCCACCCACATCCTCTAGCAATACCTATAATGAAC  
AAGTATTACCTTACAGTATTATATTTTATGGCACAATTTCAGACTACATTGCGTAAGAGT  
GATATGCATTGAAAAATAGAGAAAAGAAAGAACCAAACCTGAGAGGGTATCATGTAAGGT  
GTCCAGTATAACAGATATACTTAAAAGAGGAACCATTTCTGTGAAATAATCCACCACGTC  
CAGCTCATTGCTAAATGCATAACCTACAACCTGCCTGCAAGCAAATATGATTGAGCTCAC  
CAGAATGGCCGCGGATGCTGCAAGAGTCATAGCAGCAGAAACAGACACTTGTGCCAATTG  
TGGACTTCCACCACCTAATGCATTTGAAACTCTAGTGCTGAGTAAC

>**Gmax\_MSTRG.72921.1** GeneID=Gmax\_MSTRG.72921;Strand=+;Pos=Chr14:228884-229134,  
GACCATCAAAAATATATGCCAGTGCATTAAATGGTTGAGAAGCACTGACAACTAGCAAC  
AATCACAGATAACAGTGTAATTCTAATGCGGATACAGACAAATGCAAACAAATACATACA  
AATCAATCACCAATACCATACATACCAACGCCAGAGTTTTGACCACCTGCAAGACTTCAG  
AGTCCTGAGTAAAAATAGTGGCTAAAGATCCAAACGATGCACCCAGAATTGCAGTCAAGC  
AAATACCCATT

>**Gmax\_MSTRG.6399.1** GeneID=Gmax\_MSTRG.6399;Strand=+;Pos=Chr02:7927886-7929336,  
GGAGTTGATCCAGCATTTTGACCAAATTAGAATAATATAATAAAACAGTCATGCATGGAC  
ACTCCATTATTACAAACACTCCATTATTTTTCTTGTAACATTTATATTATCTGTTACTTA  
TTTCTTTGCTTTCATTTATTTCTTTGGCTCTCTAGATGTTGACGTAGGTGTCTCGTAACA  
TTTCTTTGCGAAACCATAGTTTGGTGACTTATTTCTACGGAATCAAAATTATATATC  
TATGTCTATGTGAGACACAGCTGACCAAAGTAGCTTTAAGCACTCGTCATGTGATATGAT  
CCATTTACGTCTGGTGGTTTAGCATCAAATACTCTTTCCCTTGCCATAATTGCCTACAAA  
AATTGCACAAATCCGACACCTAATTAACACCAAACATACAATATTTCTACATTGCAAAAA  
AGAAAGCATATTGGATAATTAAGGATAGTGTCAAATTTATCAATTGTGAACCTGTTTTTT  
CCAGTTGGTAAGAGCAGTAATAAGGGAAAGGAGAATCGATTGGACAATGGAGCCAGTGAC  
AATTCCAATCCAGAGGCCCTTTGCTCTGAAATGTGCAACAAAGCCAAGTAGGATACCCAC  
AGGAATTCCTACCAGATAAAACGCTCCAGATTGACATAGGCTCCTAGATGTTGCCACCC

ACTTCCTCTAGCAACCCCTGATTATTTTATCTATTTACTTATTTATTTTCGTTGCAGGTT  
AGCAAAATAATAATGATAGTTACTGACAAAATATAACACACCAAATGCATTGGTAACACA  
TTTTCTAACGTTATCTTTTTAACAAACCCGCTTTTGAAATTTAGGTGACTCCATCCTAAC  
AATTTAGAAATGTTGATAACATATTTTTTAACACTTATTTTTTTAACAAATTCTTTCTTA  
CTAGTTAAAATTTAAACCACTCCAAACAATTTAGGAATGTTACCCCATCAAATAAGAA  
TGTGACTTACAACATATTTAGTGAGATGAATTTTACTCTAATGATTATGGGAGAGGCTGC  
GTCTGTTAAAAGTATCAAAGAGTGGTGCATTTCTTCTAGTTTAACCAAAAAGAGTGTAT  
TTCTAGCAATTTTTTGTCTTGTAGCTTTATTTTACTATGCAGCATTCAAGAGTAACCT  
AGTTGGTTGAAAGCACCAACGTACAATTTAATTTTCAAAAAGCAACAAGCAAAAAAAGAA  
TAGGAGAGAATAATTAACCTGAAAGAACTCCTTGTAAGCTGTCAGTAAAAATAGAGAGAC  
AGAGCAGAGGGATCATAACAGCCACATAATGAACAACCATACGGTCATCACTATAGGCAT  
AACCCAAGATATGTCTGCAGCCGAATAGTGTTGCACTTACAATGAAACCCTCTGTGACTG  
CAAGGAACATCGTTGCAGAAACAGCCACATGAACTGCTTGTGGATTCCCAGCTCCTAATT  
CATTCGAAACT

>**Gmax\_MSTRG.104177.10** GenelID=Gmax\_MSTRG.104177;Strand=+;Pos=Chr20:36605725-  
36605828,36606807-36608480,36608599-36609241,

ATTTCTTATTTTACTGCATTAGCTTAGTTACCTTAGTATAGCAATCCTAACAGTTCTTG  
CCTCAAATTTTTCTTTTCAGGAATATTCGATGGATTTTGCACATAGCCATAAAGACTTGG  
AAGTGGAGGCAAACCTGTTTTTCCCAGTTTGTACAACCTGTGATGAGAGATAGCATAATT  
GTTTGGCAGAAGGCACCAGTCAGTATTCCAATCCAAAGGCCTTTTCCTCTTAATTGTAGC  
CAGAAACCCAATATGGCAGCCATTGGAATCCCACAACATAATAAGCTCAAAGGTTTACA  
TATGCTCCTATGTGCTGCCACCCACATCCTCTAGCAATACCTATAATGAAGGCATAACTC  
AGATTCCATTGCTTAAGAAGAGTAATGTGCATTGAAAAATAGTTCAAACAAGAAGTAACC  
TGAAAGGGTACCGTGTAACGTGTCTACTATAACAGATATACTTAAAAGAGGAACCATATC  
TGTGACATAATCCACCACATCCTGCTCATTGCTAAATACATAACCTAAAACCTGCCTGCT  
AGCAAAAATGATTGAGCTCACCAGAATGGCCTCAGAACTGCTAGAGTCATGGCAGCAGA  
AACAGATACTCGTGCTGATTGTGGACTTCCAGCTCCTAATGCATTTGAACTCTAGTGCT  
GAACAACCCGCCAAAAGAGAAACCAATCAGAAAGAGGAAAAAATTCATTTACTATAATA  
TCATTCTACATGAATACGAATATGCACAAATTGATGAGCTTAGGACTTGTGTGAATCAAA  
ACCTTGCTGCTGAGCCAATTGCTTCTGGGATTGTGTAGATAGTTGTGATGATGGATAAAC

TGGTCAGAACATAGTTAACAATAACAACAAATTAGCAACACTTGCATGAATGGAAATCAA  
AATTTGGCTGAGTAACAATTTCAACACAGATTTTAAAACACAAAGCCATTCATGTCTGAA  
GGACTAGGATAAGTTGTACATACCATATGGATAAGACTGAAGTTTCAAGCTCTGGATTTG  
GTAGAAGACCAGAAAGCAAGGTTAGCAGCTCAAATGACCACCACTCAAGGCTGCAACGAT  
CAAATAAGTAAGAAACATACCATGGTTGAAAATTAATGGGAAATAAAAACACAACACAA  
AAGATAAAATATAAGAGGAAGAACTCACCAAACCATTCAGCTGAAGGAATAGCATAGG  
TGAAGAATTCACCAATCCCATGGAATAGTTCATTGAAATTGGGACTCGAGTCCTTTTAC  
ATTCAGTAGAGAATTTTCATATATAAGCCAAGTAAAATCACATTCAGCCAGTATGAAGTAC  
CAATTGAAAATGCTGCTCCCAAGTTACCAAATCCAGATTTAAAGACCATTAACCAACTGA  
AAGCCACATGGAAGCAAAGAGTAATGGAGGAACTTATGACAAGGGGACTGATCAAACCTT  
GCATCAAAAAGAATCGAATCAAGGCCTGAAGTGTTGCATAAGCAAAGAGAGCAGGGATCA  
TGCACAAAGCAAATTTTCCAGCTTCTTGTAAGTGAAGGGTCTTGGCCAAGAAATATGA  
GTATCTTCTCCAAGTAGACCCAGAAAAGAGTCAGAGGAAGACAAGCTAAAGTAAGAGAGA  
CAATAGCAGTGTATATTTGAACACCAAATTTTCGATATTGCTGTGCTCCATATGCTTGCC  
CACATTGAGTTTCCAGTGACATGACATTCCAAAGTGTGACATGTACAAAAAGACAA  
AGTGCAATTAATTCTTATAATTTTTTTAGAGACCATAGTAGGTCTCAAAGCTTAAGAAGA  
AAGCAGTGAGATGGGAAAGGAAGAGACTTACAATAAGACTGAAGCCAGAGACAGCACAGA  
GAGAGATGGCAATGGCTGTGCTAGAGAGAGCAAGCTTACCCAAGTGACCAACCATCATCA  
TTGAAATAATCTGTAGAAAATACTGTGACAAAGTCACAGTAATCATAGGAGCTGCTAGAT  
AACCCACTCTTTTCATTTCTGAGAAAAGACAGTCCATGTTATGGCTGAAGCTGAAGGAT  
TCTCCGGCTCTGAGTCCTTATCTAAGAGACTATTTTCATATCCTCTCAAAGGGTCACA  
GAATCACTGCACCTTGTCGAAAGTGGTAGAAATAATGGCAGGGCTTTGGTGTTTTGTATG  
CTAAAAGGTTTAAATATTTACAAGTGGCAGCAGCAGTAGTTCTTCCAAGGTTTAAATATT  
TGTTTCAATAATGACTGTCTCAGAGTCTCTCATGGGCTTCCCCCTTATGTAGACGGAA  
CAATATTTCAAGTAAATTTTAAATTTTAAATCATTCCATCTAATCTAATTTAATCTAAA  
TTTTAATTTGATTTCTTATAATTTTAAATCTACAATTTTAAATTTTATTTTAAATT  
AAGACAATTTAGTCAGAACAG

>**Gmax\_MSTRG.91143.1** GeneID=Gmax\_MSTRG.91143;Strand=+;Pos=Chr17:40283857-40284096,

GCTCAACCAAATGGTGCTCAATCATGTGAAATATCCATGTAGAAATCATAACAAGCTGGC  
CTATAATCTAAAATTAATTTCCAAGTCTCACTCAAATACATGTCGAAAAATTTAAAGT

TCTTCATTTATTGGTGCCACTCAATAGAGTCTCTGTCTAATTCTCTACTATGATAAAAAA  
AAATCATTGATCATATGAAATTGCTCCTCCCCACTTTCTCACGCGGCTTTCTGCTTCTTC

>**Gmax\_MSTRG.21812.1** GenelD=Gmax\_MSTRG.21812;Strand=-;Pos=Chr05:4910236-4912125,

GCGAGATCACAGAAACAGAGTCTGATTTTGATACTATGTTAGATTTTCATCTTAAAATTAA  
TTGGCTTTAAGTAAAATTATTCAACAGATATATAAATTACACTCTAAGGAGTTAGACAGC  
GATGTGGAACCTGGTATTTCCCAACAATTACAAACACTAGTGAGTTTGAAAAGGGACTCA  
ACATATTGTACATGGGAGGGGAAATATAAGGTTAGTCTGACTGTGAAGGAAGAAAGAAGGA  
AAATGGGAAGAGAATCATCTGCTAACAAAAAAATTAATAATTAATTTATCTATAGAAAAA  
AATTTGTACATGAGAATGATCACCCGGTTTTGACACTTGATTTTATCTACGTGTTGCGAGA  
CATGTCTAATTCTTTCTCAGAGGTATCTTTGCACAGTTCATTTACCTTATTTCTTGAAAC  
TTGTTACGTACCTGTGCGGTACATAATAACGTTTGTGCCTTGGTATATAGCCTCTTCGA  
CCCAATTTATTCTCACAATAAATGTTAACAACAAAATCAAGGAAGCAACAACACCAATCA  
AGAATCCTATAATGAGTCCAGCAAGTCCTAACCGAAGCTTGAAGGCAAAAACCGCACCCA  
ATGGTAAGGCCAGGAAATAGAATCCACCAATATTGGCATACATGCCAAGTCATGGTCTTG  
CAGTCCCTCGCACCATTCTCCACAAACCGTCACAGGAAAATTAACACTTCCACTAGAG  
CAATCACCAACATTGTCTTCTTCAAACCCTTTACAACCCCTTTAACATGGCTAAACAAAT  
TCCCTCAAACCCTTCTAGCAGCCACCATCATGGAACCTCCAATGCAAACCGATATAACAC  
TCACTGCCAAAGGCACACGTGCTGATTTATAAGCTTAACCAGCACTACGAGTGGAACAC  
AAGTGGCTAAAGAAAGCATCACCGAGTAAAGCAAATAGTCAAAGTTCAACACTAAGGCTA  
GAACCCCCACTGCTTGTTTTGCATTTGCCAAGTGGCCAGTGAGCAAGACTAGAATCTCAT  
AACACCACCACTCAAGGCACGTGTTGAGGCAGCATGATCCACTAAGCTTGATTAGCCTAA  
TCCAATCCATCATGTTCTGATCCCACCACCCTCCTTCCTTCCACAACATGCTCCCGTTTC  
TTCTCTCAAGAATCACAACATATATCGCCAGCATAACCATAACCATGAGATCGTTGATCC  
AAACCGCAATTGAAACACCTCGGAGTCGCATGGTCTTGGAGAGTAGTATGTTGACGGGTA  
TGTGAAAGGCTAGTGTCACAGCAGAACTAAACATGGTGGGAAGAGTCATGCACTGAGAGC  
TGAGGTAGGCTTTTAAGGGACAAAGGAGTGAAGTGACCAACAAGTCAGGTGTGAGATAGG  
AAACATATGTTTTGGCCACTATTGAGATCTCTTGTTGTTGGCCAAAACGGATCAAAATCT  
TGTCAACCTTAAGCCACAAGAAAGACAAGGGAAGTGTTACCAAAAGCAACAAGAGGGTTG  
TCATGAGAAGGGTCTTGTGAAGGAGCCGCACGTTCTTGGTTTCCATGGCGCCTCTTAGAC  
CGTTCAAGACAGAGAAGCCAGTGACATTAGCAAACTGAACCCGAGTGCGCCACCGGCTA



AGTTCAGCTCCCCAAGGTGGCCAAGAAAAGCTGTTGTTATGGCTGTCTTGGCGAACCTAG  
CCAAGTTCATATGGCCACAAGTGGAAGGTCTATCCCTCGTTGAACTCTTAGCTCTTCTAG  
TACCATCTTTATGAAATTGGCCTTATCGTTTGTGATTAGCTTCTCTCCTTGTTTTGATGT  
TGCTGACATTTTTTGCTTAGATAACGTTTTGGTGAGATTGTTGCAGAGTTCCACTAGCGC  
GTTTCTTTTATATAAGATTGGTTAAGGTTG

CTTGACAACAGGCCCAAGATCTTTGAATGCTAAAAATGAGAAACCTTCCATGTTTCATC  
GCACCAACCACACGTAATAAATATTAATTGACCAATATTAGGAATCCAGAATGCCAAAAT  
TGTTGAAATCATTGCACCAGGAATCCCAAACCTGAATTGTATAGTCAATAGCCAAGAAAG  
AAACACATGAATGATTATTGATAAAGCTGCCAAGAATGCAATTACGACATTCTTGCTTTG  
AGATTGAAGGAATGTCTGGCAATTGAATGAGACAATATAAGCAAATAAGATAGGAATTGA  
CCAAAGAGAAATGGTTCCTGCCACTTGTGCTATGTTCTCATCTTGGCCTAAGAGCATCAA  
TATTGGGCTTGTGAAGATGAACACAGGAAGAAGACAGAGTGCAGTTAAGAACAAAACCTAT  
CGATGATCTTTGAAGATACACTCCCATCATGTCATATTCTTTGCACCGTATGCTTGTCC  
ACAAAGTGTTGATAACGC

[illegible]

>**Gmax\_MSTRG.85662.1** GeneID=Gmax\_MSTRG.85662;Strand=-;Pos=Chr16:34081435-34081736,  
AACATAACACGTCACCTTTTTATTGTGGAGTAATAATAAGGCAGATTAATTCATGTTTG  
GTACTCCATCCATTCACACCATGTAGCAGCACTGTTTTGAAAAACGATCAATGCCGGAGC  
CAAAATAAAAACTTGTTTGGTTTTAGTTTATTTTCTTAGTTGTGAAAATAAAAACAAATT  
TGAGAGTGGTAAATAAATATATTAATAAATGAAGCATTGCTCCTTCTCATGTAACATTTT  
CCATGTCATTCGAGTGGAGGTTGTTGATGCTCCATATTCTCATGCGATGAGCTGTTTGCT  
CC

>**Gmax\_MSTRG.55218.1** GeneID=Gmax\_MSTRG.55218;Strand=-;Pos=Chr10:49045608-49045999,  
CTGAAACCAGTAACGGTGGCAAGAGAGATGGCTAAGGCGGCCAGAGAGATAGAGATTG  
TTATTGAGGTGACCAACCATCATGATTGACACAACCTGCAATAAATACTGGGTAGCAGTC  
ACAATTACCATAGGCACTGCTATGCAAATGATCCTCTTCATTTCTTCACCCAAACCATCC  
CATGTAACTTTCTGCTTCTCTCTTTGTTTTGCTAATAGATTCTCTTCCATGGTTTTCTAT  
CCTACTAGTACGACGAGTCCAATCGAGAGATAGAGTGCGTGAAAGATTTGAGTTGCTAAT  
ATGAAAGATTGTCTCTGCCTCTCAATCAATCATATACTATGACCACATTCTTTCTCTTT  
TAGTGAATTTATGAACCACCATGTGTTGAGGA

>**Gmax\_MSTRG.20764.1** GeneID=Gmax\_MSTRG.20764;Strand=-;Pos=Chr05:131279-131821,  
AAACATGAGTCCGGAAGGGATAGCTAATTTCAAGAACTCTGGAATGCTAAGTAAAGCGTT  
ACTAGAAAAGACAATCTTGGTCTTTTGACAAGCCGGAGAGAAGATCATATAAATTGCAAG  
CCAAACCACATTCAACCAATACGAGACTCCAATGGCTAATGCAGCTCCAATGTGTCTCAG  
TCCCAACTTAAAAACCAGACCCCAACAAATAGGAACATGCAAAACACAGTGCGGTGATTGA  
GCTGAAAACCATGGGAAAGATCATACTCTGAGTCTGGAAGTAGCGAGTGAGAGCTTGAAG  
AACAGCATGGCCAAATAGAGCTGGAATAAGGTATATGCAGTACTCACGAGCTGCATGAGA  
AATTTCAGGGTCTTGACTAAACAGCATGAGTATTTTATCAGTGAATATCCACACCAGAGA  
TATCGGGAGACAAACCAATGTCAGAGTCACAATCGCACACCAAATGTAGTTTCCAAACTT  
CCTATACTCTCCGCACCATAGGTTTGCCACATAAAGTTTCCAATGCACCGGACATTCC  
CAA

>**Gmax\_MSTRG.64516.1** GeneID=Gmax\_MSTRG.64516;Strand=-;Pos=Chr12:35567010-35568748,

AAAGAATGAAAATAGAATGTTTCTATCATATTTTTTTCATTCTCTATTTTCTCCGAACAA  
ACAATGGCACAAACTAAAGCAGCTTATTGTACTTGAATGGTGATTATTTACACCTCATT  
TTGGGGTATATGCTGCTTAAATTAAATAAGAAATGCTGAAAAGCTAGATATAATGGGGAA  
AAAAAGTGTTAATTTTGATATATTTTGAATCTGGAGAAGGTTGTATATTTTATATATGA  
ATGGATTTGAAATTTGATGAGAGATGCAAAGTAAGAAATAAAAGAAGTTACCAGATAGA  
AAGGGAATCAAGAGCCAACTCAGGATTAGGGAGAAGCCCCGCGAGCAAAACCAGAATCTG  
AAAGTACCATGTCTCCAGGCACAGCATGACCGCGGACGCAGCGGAGAGCTTGAAGAACCC  
ATACAAACCGCTAAACGCCTCCACGTGAACCCCTGCCACGTGCGCCTGCACCTCTCGCT  
CTTCACTATGTACACGTACTGTCCAATCACCATTATCCACCACGACAGGCTCAGCACCAG  
CGACGCCCCAACAGCCCCAACCAATCTCGTACACCGCCACCCAACCTCATCCCCAGGTG  
GACCACCAGCGTCGCCGCTGATATGTACGCGCTCGGTGCCACTATGCTCTGCGCTTGGAG  
AAACTTCTGGATCGGGAAGTTCGCCGCGTATGCGAATATCTGTGGGATCAACCCGTACAC  
AAAGAGTGCTGCCGCCGACGCGATTCTCGGTGATTCCCCGAGGAATATTAGCATCGGTTC  
GCTGAATACGTATATCACGGTCAACACTACGCCGGCTAGTGAGAGAAGAATCGTTGACCG  
CTGCATGTAGACTCCTAACATCCCGTACTTTTGAGCTCCGAATGCTTGTCCGCATAGCGT  
CTCCACGGCACTCCCCATACCCAACCTGCAAGTAATATATATAATTTTGTGTTTTCAATA  
ATTACGCGCAATTATCAGCAGAGATTCACTTGAAAAGAAAATGGTGGTACCATGAGGCCG  
TAGGCGAACATTTGGATGCCGGTGTGCGGAGGGAGGCGGCGGCGAGTTCGAGGTTGCCG  
AGGTGGCCGGAGAAGATTTGGGTGGACATGGACATGAGGTAGTTGATGAGGTAGACGATG  
ACGGCAGGGGCGGCGAGGAAGAAGAGGAGCTTCAACTCGATCCAGGTGGCGGGTCCCACA  
CGGTTGAGGAAGGGTAGGGTGTCTGTCGGAGAGAATTCTCTCAAGTTGCCCATGGGAGGAG  
GACTCGTGCTTTGAGTTTGATCGAGTTCCTCCGCTGTTAACAGTGGCTCTTTCTCCGCT  
GAACCCATTGATCTCGATCCGAATTCACGGCAAAGAAGGCTTTCTCTCCTGTAACGTTTG  
GAGCAGCAGCAATCTCGCCGCCACAAGTCCCAACTCACCTACCACGAGGAGCCGTAAGGC  
ACACCATCTCTTATATATACACATATAACGAGAATATTATATTATATTATATTCAACAAC  
CACTAGGAGGCGGAACCTCACTGTAATTATAACTGATTTGAAACGTGTTTGGGTGGGATAA  
TCGTAGAAATGCTAGCTTTTTCGTTATGAAAATTACTAGAATATATGTGTTGATTTTTTA  
TCCAAGTCAATCTCATTTTTACAAGAAAAAAAAAACAGAATGTTAATTTTTTTTTTTCAG  
CCAAAAGAAAAGCTTTTAATAAATGAAGGTACAGGGTACCAATCCGTATACAAAGTCAT

>**Gmax\_MSTRG.10862.1** GenelD=Gmax\_MSTRG.10862;Strand=+;Pos=Chr03:466665-467217,

GAGAAGAAAGCTCACCATAACATGGCACCAGATGAAATGGAAAGCTTGGCAACCGGCCAA  
AGATCTTTGAATGCTAAAAAAGAGAAACCTTTCCATGTTTCAGGGCACCAACCACATGTA  
ATAAATATCAGTTGACCAATGTTTCGGAATCCAGTATGCCAAAATTGTTGAAATCATTGCA  
CCAGGAATCCCATACTTGAATTGCATTGTGAATAGCCAGGAGAGGGACACATGAATGATT  
ATTGATAAAGCTGCCAAATATGAAATAATGACATTCTTGCTTTGAGATTGAAGGAATGTC  
TGGCAGCTGTTTGAGACAATATAAGCAAATAAGACAGGAATTGACCAAATAGAAATGGTT  
CTTGCCACTTGTGCTATGCTCTCATCTTGGCCTAAGAGAGTCAAAATTGGGCTTGTGAAG  
ATGAACAACGGAAGAAGACAGATTGCACTTAAGAATAAACTATCCATGATCTTTGAAGA  
TACACTCCCATCATGTCATATTCTTTGCGCCGTATGCTTGTCCACAAAGTGTGACAAT  
GCACTTGCCATTC

>**Gmax\_MSTRG.540.1** GeneID=Gmax\_MSTRG.540;Strand=-;Pos=Chr01:2611779-2612886,2613846-  
2613908,2616315-2617601,

AGTGATTATGATTTTGAAGAGTATTCAAAAAGATTATAAGATAGAGATTACCATAGCATG  
ACTCCAGCAGCAGCAGAGAGTTTCAGAAACTCCCAAAGACCAGAAAACGCTTCAACAGAG  
AAACCACTCCAAGTGTGAGGGCACCCACCCCAAACAACGTAGCCAAAAAGCCCCAAAGTG  
AGGACCCACCAAGAGAAGTTAATAGTAGCAGCAGCACCAACAACACCAAACCTGAAGCTTG  
AACACGAACAACCAACTTACAAACACATGCACCACGAGCGCCACCAGAGACACCCACGCT  
ATGGGCGCGGTCTTCAGCTGGCACTGCAAGAACCTCTGCAGAGGGAACTGAAACGCAAAG  
GCAAAGTGCACCGGTATCATCCAGATCGACACCGCGCCGGATAGCTCCGCCAACTCCTCC  
GGCTGCCCCAACAACTTCAACACCGGCGAGGCAAACAAGTACAAAGGCAAAAGAAAGATG  
CAACATATGAAAAGAACGATCCATGAACGCTGCATGTAAACGCCTAACATGTAGTACTTC  
TTCGCTCCAAAAGCTTGCCCGCATAGCGTTTCTAAAGCGCTTGCCATACCCAACTGATTA  
AAAGATAAATGCGAGTTAGTATTAACATTTAACGATTAGAAATTTCAATTCTAATCGGAG  
AACAACATTAAATTAATAACATGTTATTGTACTGGGCAATCTTCAACCTAGCTAAATAG  
TTTTCGATATTGTTCTAATTAGAGAACATGGCTAAAAACACATTATGTAAGTGTGTCTAA  
ATTTTGTGCTAAGTGGGATTAATAGTATTATATATTATACCAAGAGGCCGAAGTCGAAGC  
CAACGACGACATTATTGGCAATGGAGATGGCAGCGAGTTCGAGGTCACCAAGGTGGCCTG  
CAAAGGCTTGTGTTATGACTAACATGGAGTAGGATGCAATACGGCTGAAAATTGAAGGGC  
CTACTATGTGCCAAAGCCTCTTTGACTCAAGCCAAAACCTTCGTGGGAACTTTGGTCTT  
GTTCTCTTTCATCTGTAAAGGGTGAGCTTCTAATAGTGGAAGCTTTGCTTCTACTAAAG

GTGAATCCTCTTTGCTTGGCATCTCGGAGTCGCTAGCTAGCAATATGTGGTGCTGGTGAG  
GCTAGAGCTTCTGGGTGTTCTGAAAAGTGTGAAGGAAACAAATTTAAAGAAAGGAAGAAG  
AGTGATCACGAGAGAGGTTCAAAAGTACAGGCTTTTAAAGCAGATGTGGCATGGTCTGGT  
TTCTTTCAAATGAACAAACAAAAAAGGGTTGGACATATACATGGAGAAGTAAATATCAT  
GAGTTGATTCAAATTTTGATACCAACTGGAGTTAAAAGGAATGCTTCGGATTCTTGGAGA  
TGGAGAAACAAAATTCTGGTATGCATTCCACGAGGTCGGCATAACGAGGTGTTGACATAT  
ATATAATGATGAAGTTGACCTTGTCAATCAATTCTACCCTCTGTGGTGGCGTTTGAAGAT  
CTCCAATAAGTAGCTTTTCATGATTTTGAGGGATACTGTTATGACTAGAAGCATTGATCA  
ACAAAACCAAGAACCAGGAAGTGCAGAACCAAGCAAGGATGCAAAACCAATAATGGCCA  
AAAAGAGAAATCAACAAACCTACTACCTTAAAGGATTTTGTGTTAGCAAATTAGGAAGTA  
ATGGCTGAGCTTGTAGCTGAATAGTGGCACTCTAGATGCTTTGTTGGTTGATTCCATTCC  
GTTAAGAATTGTCCCTTTGATTTTGTCATTGTTTTCTTCAAGGCACACAATGCCAAAT  
CCGTTAGAGATTTGTTAGCTGCATTTCTATATATATAGGAATGATGTATTCTAATGGATA  
AGCAGAAATAAAATCTCTTTTCTCACCTGATTCTGGAGGTTCTAGGCCTCGAATGCTA  
GGATTTATTTTCAACTCATAACAACCTTTGGTGCTTTTATTAAGAGGCTCACCATGGCTGA  
ATCAACTCGGTCCAAATCCAATTGGGATCGCCTTGAAGAAGTCATAGTCAAATTGGCCTC  
TAACCAGATCCACGTTATTGAGAACTTGATGACCTTATGCATCCCATCACTGTCCTCGA  
AAACACTTCACCCCTAGTAGCCTCACCTTTCTCGTCCTCAGCCATACCTAAACCACCTAC  
CCACTTAACCAATCCACCAAAAATGAACTAGATGTCCCACGATTCGACGGCTTAGGCCC  
TTCTGGTTGGGTTTTCAAATTACGCAATCTTTGAATACTATTCCACCCCTAAATCAGA  
GCGTCTCACCATCGCCTCCTTTTATATAGAGGGTCCGGCCTTAGCCTGGTTTTAGTGGAT  
GATGCGTAGCCATCAGCTCACCACCTGGACGAGCTTCTGCAGGTAATCGAGGCCCGTTT  
CGCGCATTCCCCGTACGAGGACCCAACCGAAATTCTCTTCAAATTAACACAAAAAGGC

>**Gmax\_MSTRG.93969.1** GeneID=Gmax\_MSTRG.93969;Strand=+;Pos=Chr18:23076561-  
23077123,23077737-23078463,

ACCAGAGCATGACAGCAGAGGCAAGAGAGAGACGAACAAAGCCCCAAAGATTGTGAAAGG  
CTTTGAAGGTAAAGCCAGACCAGGCCTCCCCGCAGGCCCCACCCATTATATAAACGAGCT  
GCGCAAGGTTCGATGAACCACCACGACGCGTTCAGCACACGGCAGCGCCGACGAGCCCC  
ACCGGAGCTTCAGCATGAGCAGCCAGCTGAACACGGTGTGCAGCACGAGCGCCGCCGCCG  
CAATCCACGCCATCACCATGATCCTGCTCTGCGCCTGCAGGAATTCTGCGCCGGGTAGT

TCACCGGTACGCGAACAGCTGCGGGATCATCCACACCGCGAAATCCCCGCCGCCGCCG  
AAATCGCCTCCGTCTGCCCTATCGCCCGCAGCAGCGGCGCCGCGAAGATGTAGAGGAGCG  
TCAGCAGGATCGCGGTGGCGTTCAGGATCACCCACGAGCGCTGCATGTACACGCCAGCA  
TGTGCACTTGCCCCGCTCCGTACGCTTGTCACATAGCGTTTCCAACGCGCTTCCATTC  
CAAAGTGCAGCGCAAAGTCCACAATGATGCCAAGGCAGAAGCCGGCGATGACGGAGTTTTT  
AATGGAGATGGCGGCGAGGGCGAGGGTGTGACGTGGCCGGAGAAGACTTGGGTGACGGC  
GCCGAGGGAGTACTGGCAGACGGAGGTGAAGATGGCGGGGCCGGCGAGGTACCAGAGCTT  
CTTCGACTCGGCGAAGAACTCTCTGGCGAAGTCGCCGGCGCCGGCGATCGGAGCGATGTC  
ATCGGATTTGCCGTGAAGACGACGGCGGGGTCCGGTGTGTGGTGTGCGGGCGTGAGAAG  
TGGGTGAGTATGGTCCTCATGGTCTCCATCGTGAATTCGTGATATGAATCAGAGATACG  
AAAAAATTGAAAATTCTAGAACAACCTTTATAAAGAAAAAGTTCCGGCCTTCAGAGCAGGT  
TTTTACTGTTACCCAATGTAATGCCACACTCCGTATCGGTTTCGAAAAGGAGATAAAAG  
TAAAAAGGATAGGGAGAAAAATCAATCATAATGTCACGGAAAGTAGATAAAAAACATAG  
TGACAAAATAAAATTATTTTAAAGTTTAGGGTTATAACTTTTTTTCCAGAGTTTAGGGTT  
ATAGTTGAAACGCCATAGTTGCTATAAAATATTTTATTCGCAATTGTCCGGTTCTCATGT  
AAGAAAAAGTATTGTTTCATGTCATTTAAAGATAGTTTTAGCCTTTGGAAAATTCTCATT  
TGTCTTAATAAAATTTAAACGTTGAGTTTT

>**Gmax\_MSTRG.104177.1** GeneID=Gmax\_MSTRG.104177;Strand=+;Pos=Chr20:36602362-  
36602429,36607743-36608312,36608599-36609133,

GTTGTACATACCATATGGATAAGACTGAAGTTTCAAGCTCTGGATTTGGTAGAAGACCAG  
AAAGCAAGGTTAGCAGCTCAAATGACCACCACTCAAGGCTGCAACGATCAAATAAGTAAG  
AAACATACCATGGTTGAAAATTAAATGGGAAATAAAAAACACAACACAAAAGATAAAATAT  
AAGAGGAAGAACTCACCAAACCATTCAGCTGAAGGAATAGCATAGGTGAAGAATTCAC  
CAATCCCATGGAATAGTTCCATTGAAATTGGGACTCGAGTCCTTTCACATTCAGTAGAGA  
ATTTTCATATATAAGCCAAGTAAATCACATTCAGCCAGTATGAAGTACCAATTGAAAATG  
CTGCTCCCAAGTTACCAAATCCAGATTTAAAGACCATTAACCAACTGAAAGCCACATGGA  
AGCAAAGAGTAATGGAGGAACTTATGACAAGGGGACTGATCAAACCTTGCATCAAAAAGA  
ATCGAATCAAGGCCTGAAGTGTTGCATAAGCAAAGAGAGCAGGGATCATGCACAAAGCAA  
ATTTTCAGCTTCTTGTGAAATCGAAGGGTCTTGCCAAGAAATATGAGTATCTTCTCCA  
AGTAGACCCAGAAAAGAGTCAGAGGAAGACAAGCTAAATAGGTCTCAAAGCTTAAGAAGA

AAGCAGTGAGATGGGAAAGGAAGAGACTTACAATAAGACTGAAGCCAGAGACAGCACAGA  
GAGAGATGGCAATGGCTGTGCTAGAGAGAGCAAGCTTACCCAAGTGACCAACCATCATCA  
TTGAAATAATCTGTAGAAAATACTGTGACAAAGTCACAGTAATCATAGGAGCTGCTAGAT  
AACCCACTCTTTTCATTTCTGAGAAAAGACAGTCCATGTTATGGCTGAAGCTGAAGGAT  
TCTCCGGCTCTGAGTCCTTATCTAAGAGACTATTTTCCATATCCTCTCCAAAGGGTCACA  
GAATCACTGCACCTTGTCGAAACTGGTAGAAATAATGGCAGGGCTTTGGTGTTTTGTATG  
CTAAAAGGTTTAAATATTTACAAGTGGCAGCAGCAGTAGTTCTTCCAAGGTTTAAATATT  
TGTTTCAATAATGACTGTCTCAGAGTCTCTCATGGGCTTCCCCCTTATGTAGACGGAA  
CAATATTTCAAGTAAATTTTAAAATTTAAAATC

>**Gmax\_MSTRG.62823.1** GeneID=Gmax\_MSTRG.62823;Strand=-;Pos=Chr12:8615952-8616426,

TGGTACTGTTGATCCGAAAGATTTTTACACATGATGAATACGAAATTTATTGTTAAATAG  
ATCATTTTTATAACATGTTTGTCTCCCAACATGTGAACACAACGTGACTAACACTACGC  
AAACTATTCGGGTTAGACCAACAAATTGGTAGTGAAATTATGAATTTGGCCTCATCTTAC  
AATTTATTTACAACAAAAAGCTATGAGATCTAAAGCCCGATTTGTGTTATTGTATAATTG  
TGGGCTAGGCTACATTGAGAAACAAAGAGCCTCAGTTATTGACAAGTGGCTCCGTTTTGT  
CCTCCCCTTGTTCACCTCTTTGCTGCTTCTTCAACCTACATTAATTCAAGAAATTATG  
GTTAGAAATTATTAGCTCGTTAACTTCATACACATTACATAGTAGAATGATCAGAACAAC  
AGAAGAAGGTTGTTTATAGTCTTCTCTTTTTTACCTCTTATTCCAATCCGTTC

>**Gmax\_MSTRG.58090.2** GeneID=Gmax\_MSTRG.58090;Strand=-;Pos=Chr11:8552500-  
8553008,8553236-8553369,

CCTGGATGACCATCCGATCAGGTGTAAAAATATTGGGAAATAACCAAGGAACCGATGTTC  
CAATAATCCCTAACAACAATCCAAGTATAGCTCCAATTATCACGAGAGACCTTAGAAGCA  
TTCGGGCCTGTTATTTTGACAAACTCCGATTTACTCCATATATCAATTCAGGCATAAATG  
ATTGAGAGGTTTGGGAGAGAGGTTACCCCATACGGTACACATTAAATAGGTTTGGACCA  
TGACCTGAAGAGGGAATGAAGTTATCACTGGCCTTGAGTTTTTGTTTTTAAAAAAGCTC  
AGATGGCAGGCAAAGGAAGGAATAGTCACAAAACAGGAAACAAAAAACAATACTGA  
TGAGCAGCCATTGTATGTGTACCCATTGATGTAGCAAAATATATAAGTAGTGCGTAAAAA  
GCCACCTAAACATCAGAACTTCAGATTATATTAAGGTTATACCACTCTAGACAAAGCC  
ACAGATCTAGTATAATACTTGAGACAACCTTTGACATCAATGTTATAAAAAACAGGAGCAG

CAAGCCCAAATATCGTCAGAAGTTCCTCCCTGAAGGAATGGAGAAGGCAAGTGCATTAT  
ATCCCTTCATATTTAGATTTTGAATCATCATGTAAGAAGCAAC

>**Gmax\_MSTRG.85656.1** GeneID=Gmax\_MSTRG.85656;Strand=-;Pos=Chr16:34066562-34067182,  
AAATAGAATAGGAACCAACAGCAATCACAGGATTGTCTAGTAGACCAGCAAGTAGCATAA  
TGCATGTAATATACCATTGCTCTAAGCAATTCATTACAGATGATGCAAGGCTTAACCTAG  
CAAAGGCCCAAAATCCCTAAATGCCATCCAACAAAATCCACTCCATTCTTCTTTGCACC  
AACCAATGGTATACACAACCAAGCCACAGCATATAACCAACCTACGATATTAGTCACTA  
TTGCCAAGCCGGTTATACCCCAACCAATACATTTATGAATATGTAAAGCAACCCATTTT  
GTATAAGCAAATCCACAAATGCTATGCACATAATTACTTTAACCTTGCTCTGGGCCTGAA  
GAAATCTCTGGATGGGAAAAGCTACAGCAAAAGAAAACATGTAGGGAATTACTTGTATAG  
AATATCTTCCAGCAACTTCAGCTATTCTTCATCTTGGCCAAGCAACTTTAAGATTGGAG  
TGGCATATACATAAATAGGCAAGAGGATTATACAAGTGGCAGTAAGTATAATCCATGATC  
TTTGAACATAAATACAAGTAGATTGAATTTTTCTGCTCCAAAAGCTTGGCCACAAAGTG  
TTGCCAGTGCAGATGACATAC

>**Gmax\_MSTRG.55219.1** GeneID=Gmax\_MSTRG.55219;Strand=-;Pos=Chr10:49046691-49047235,  
CAAATCATCACTGCAGAAGGGATAGCAAAGCGAAAGAACTCCCAAATTCCTTGGAACAGC  
TCCATAGAAATGGGTGCACGGGTTTTTGCACAAGCAGGAGAGTATCTCATGTATAATCCA  
AGAAAAGTCACATTTAACCATATTGAAATGCTCATTGCTAATGCTCCACCAATATTATTC  
ATTCCAGTCTGGAACACCAAAGCCCAACAAAGGGGTATATGGATACAAAGAGTGACACAA  
GAACTTATAAGCATGGGAAGAAGCAGACTTTGCATTTGAAAATATCGAACAAACGGCTGC  
ATAATTGCATGTGCAAAAAGTGCGGGAACAAGCCAGATTAAGAATTTTCTGCTTCTTGT  
GCAATTAGAGGGTCTGGCCTATGAAAAGTAGGATCTTTCCATGCTGATCCAAATGAAA  
GTTAGGGGAAGACAAACGACTGTGAGAGAGAATATAGCAGTGTATGTTTGCACTCCAAC  
TTTTCATATTGCTGAGCTCCATAAGCCTGTCCACAAATAGTTTCCAGTCCACTAGCCATT  
CCTGC

>**Gmax\_MSTRG.47705.1** GeneID=Gmax\_MSTRG.47705;Strand=+;Pos=Chr09:40373989-40374776,  
CCTTCCCACCAATATGCAATACAAAAGCAAACACGATAGATGATGGAATCCCAACTATAT  
AGTATGACCCCAGATTGACAAATGCACCAATTTTCTGCCAACCACATCCTCTAGCAGTGC



CTGAATTATTGTTGACAAAGTGAAAAAGAAAGTTATACATCATCTATTTTCATGCTTATG  
TGATGTGCAAGAAGGAAATGTGGGTTCTAAAGAAAATTGGCCACAAAATGAACTAATTCC  
GTTTAAGTCTTAACTGTCAGTATGCCTCGCATATTTATGCAATATGCATTGGAGAAATTT  
AAAACCTAAAGAAAATCAAATCTTACAATTGCTTCACTGAAAGCTTCACATACACTCATTT  
GTACTATGCACACATGTTCTTTCCGGGTATTGGCCCATAGTAACCAGATGTCAATTGAC  
TGTATACTATTTGCATTTTTGTATGTGAGATGTATTGGAAGTTCCAATATGCCTCTCAGC  
CTATACCAAGTGCTTTTGAGTCATAGCTCCTGTGCAGACAAGTAAAAGTAATGGGGGAAAA  
GAAAAACCTGAAAGAACACATTGGAGTCCATCCAGAAAGTTGGATGCTGCCAGAATTGGG  
AACATAGTTGCTACATATTGACCACTTCTACTTCATTGCTATATGCATAGCCCCAGATA  
TTGCGTACAAGTATCATCACTGTTCCCACTATGATGCCCTCAATAATTGCTAGTACTAAG  
ACAACACGCACTGCTAAACGTGCATTCCACGGACGACCAGCTCCAAGTTCATTTGAGACA  
CGAATGCT

>**Gmax\_MSTRG.85660.1** GeneID=Gmax\_MSTRG.85660;Strand=-;Pos=Chr16:34078563-34079165,

CAATCACAGGATTGTCTAGTAGACCAGCAAGTAGTATAATGCATGTTCCATACCATTGCT  
CTAAGCAACTCATAACAGATGATGCAAGGCTTAACTTAGCAAATGACCACAAATCCCTGA  
ATGCCATCCATGAAAATCCAGTCCATTCTTCTTACACCAACCAATGGTATACACAACCA  
AAGCCATAGCATAAACCACCCCTGTGATATTAGTCACCATGGCTAAGCCAGTTGTACCCC  
AACCAAATACATTTATGAAGATGTAAAGCAGCACATTTTGTATGACCAAAACTGCAAGTG  
CTATGCACGTAATAACTTTAACCTTGATCTGGGCCTGAAGAAATGTCTGGAAGGGAAAAG  
TTATAGCACAGGAAAACATGTAGGGAATTACTTGTATGGAATATCTTCCAGCAAGATCAG  
CTATTTCTGTTGCTTGGCCAATAAACTTTAAGATTGGAGTGGCACATACATAAATAGGCA  
AGAGGATTATACAAGTGGCAGTAAGTATAATCCATGACCTTTGAACATAAATACAAGTTG  
ATTGAATTTGTCCTGCTCCAAAAGCTTGGCCACAAAGTGTTACCAATGCAGATGACATAC  
CAA

>**Gmax\_MSTRG.46904.1** GeneID=Gmax\_MSTRG.46904;Strand=-;Pos=Chr09:33354097-33354434,

CAACAACTGAAAATAGATGGAACCTCATGACCCCTTGGCTCACAGAGATAGAAGAGAGTTC  
AATGTCTCCAAGATGACCAGCATATATGGAAGTTGAGGAGTTTGTGAGAACCTGGAATAG  
ATGGGTCAATGCCACTGGCAATGCTATTCTCCATATCTTCACTGTCTCTGCCCACAAAAC  
AAATTTAACATCCTTCAAGCTTTTCACTGGAAAATAGTCAGCTTCTGAAGTAAAATTTTG

GACCACTAATGGTGTCTCCATTTGAGGAGTTCTCCCTTGATACTCAGTTTCTGAGGCTG  
AATTTTGTATAACTTCCAATCATGCATCTAAGCACG

>**Gmax\_MSTRG.17617.1** GeneID=Gmax\_MSTRG.17617;Strand=-;Pos=Chr04:8840746-8841061,  
AAAGAACTGGTTGAATGCAATTAAGAAGAACAGTAAAAGCTAACAACATTGCCAGCTCAT  
TGACCATTTGGATAACGGAAGAGCTCGATGTAAAGATCAAGGCAAGATTCTTGTTGAAGG  
ACACAATTACCAACCAAAATATAAATCCCACAAATAAAGTAGTTACCACAGAAACCACAG  
TTGCAAATCTTGACCTTTTGCATTGCCTGCACCAAGCTCATTTGCTACACGCACCCTGA  
GTTGAAGGAAGTTAGATGATTATAAGGGAGGAAAAATTAGTTGGTTTTGTACTGAGACAC  
AGTTCTTTACATCAAA

>**Gmax\_MSTRG.77932.1** GeneID=Gmax\_MSTRG.77932;Strand=-;Pos=Chr15:2770096-2770480,  
ATCTTTTTTCAGCACTAGTGATTGTTCCATTCCATGCAATCTTTCATTTTCAGTTATTC  
ATGCAATTAATTATATTTGCATGGTTACAAACAGAAGCTTGATTCTATATTTCAATTCAT  
TTCATATATATGAGACTATGAGAGTAGAGTTAGAGATTTTTCTGTACATACTTATGATG  
CAGAGGTAAATTTTTCAACCAATACCCCAAGCACAATCAAGCAGGGAAAAGTGCCTATTC  
TTTCCGAAGAATTTTTTAAGCGACTTAAAAACCTAGGGAAAGCTTCTCTTCACTTAAATG  
TAATCAGCAAACACCACTGAAACCTAGGCCTAATATGAAGCTATAACTACGGTGTCTGCC  
ATGTGCAGTCATGAGCTCCTTAGGA

>**Gmax\_MSTRG.46373.1** GeneID=Gmax\_MSTRG.46373;Strand=-;Pos=Chr09:18852614-18852946,  
TGATAGTATGCCATTTTTTTTAATAAAATTCATTATAGACCTTATGCCATGATGGAAACT  
AGTGCCAATAAGATGTATTGTCTTCATGCTTTTAACATGAGCAATGATCTAGAGGTCTAG  
CTCACTTGTTGAGCAAGATGTGTCAATCGTTATAATCCCTCTTGATACTATCGTTGATT  
CCTATGGATAAAAAAACATGAGAAATGCTTACCTCCACACACCGGCAAACATGCCAAGAC  
TCATGTAGATGGTTAGTGCAATCCATATCCCAACGAAACCTTTGCTCTTAGAGAGAAGAA  
ACAATGAAGCAACACTTGCCAATGACACGGTGA

>**Gmax\_MSTRG.547.1** GeneID=Gmax\_MSTRG.547;Strand=+;Pos=Chr01:2749414-2749652,  
GAGAGAACAGGCTGAACATTATTAATGACAATGCAGAAGCACAAAAATGGTGTGAGGTCC  
TTAACTAGATCTTGCACTTCTGTGTCGTTTGAAAACAGGGAAGGGTACTCATTCCGCGAG

ATCATCAAAACAATAGCGAGTAAACTCCGATCAAAACCGAAGTAATCACGGCAACCACT  
AGGGAAAATAATGCTGTTCTTGGGTGGCGTGCCCCTAGTTCATTTCGATATTCTCACACT

>**Gmax\_MSTRG.85377.1** GenelD=Gmax\_MSTRG.85377;Strand=+;Pos=Chr16:31794885-31796085,

GGTGCAACTTTATATAACAAGTAACTTCAACTTAGAAGATAGTCACAATCTAAATTGAT  
CATGAGTCAGCAATGTGAACTGTGGAGAATCAAATTTTTGGCGTTTAGCACAGGTCAAGT  
TCTGACGCAAGTTATACACAGCTTGAATAATTATTATTATAAGTGCTGCATTATGTGCAA  
CAGCTTTCAGGCAAAGCTGCTTTCAGTTTAATCTCTATGTCTCTCAGCCTTACATCTAAA  
ATATTATCAAATGTCAGATGCCAGATTCTCACATCCCATCCACATCTCCTTGCACTTGTC  
ACTCACAACACAACACAGCAAAAGCTACTTTTTTCATCTCAACACCCAAAACAAAACCTTGC  
CCATTAGGAACACCAGAGAGAGGGAGACAAAAGTGCTAAATATATATATATGTAGCAATT  
GGTATAGAAAATGAGATTTGGATTGGAATGGTTTCCCCAAGCAAATAAAATTAAATTA  
AATAAAAAAGACAAGCCCTCCTCAAAATTATCATAAAGCAGTTAACTCACAAGCCTCCAA  
CCCCATTGATCCTACCCAACAAAGAAAATCCCAATGTCATAATTGGTGTCATTTTCATTC  
TCTAGTGTGTGGTATCTTTTTCTTAGCATGTGTCATCTTGTGTTCCCATTTCCATTC  
ACCAAGAGCCCTTTGCTTTCTTCATCTCTCATTTTCCTTATTCCTAAGCCCATTGCAA  
CTACCCATTTCAATCCTAGTGAGCTTCTCAGCCTTCAAAGCCTCAGCTTCCCAATCTGTC  
CTCACCAACACAACATAGAGGATTGACACAGCACATGCCACCTGGGCCGACAGAAGCCCA  
AACCAAAGCCCACTGAACCCACCTGAACCAAAGGCCAGGCCACGGCCACTGGGGTG  
CCCACAAAGTAGAATGAGCCTAGGTTTATGTGGGCCCCAATACCAGGTCGGGCCGTGCCA  
CGAAGGATCCCACAGCCCGTGGTTTGTGGACAGTTCCCAAGCTCACACAGGCCCATAATC  
GGCATGACTGATGCAACCAAGGCTTTTACGGGCTCGTCGTTGGTGAAAAGCCCAGCCCAC  
CTTTGACCCAATATCACAGTCCATGTAACATTGATGAAGCCTATCACAAAAGCACATCCT  
AAGGCAACCGTTGCTGCTAGTTTTGCCTTGTATGGTTTCCAGCTCCAAGCTATTCCCT  
A

>**Gmax\_MSTRG.27310.1** GenelD=Gmax\_MSTRG.27310;Strand=-;Pos=Chr06:7113529-7114096,

GGGGGAACCCAGGAGTCCTTATAAACCCCGGAGAAGTAAATAAAGGAAGAAAGGAAGAGG  
AAGAGGTTTAGATTGGTCCACACCATCGCTATTGCGACGCCAGACACACCCATTTTAAAG  
TGGACCACTAATAAAAAAGTTGAGAGGGACGTGGAGGAGGACGGAGACGGCGGAGCAGTAG  
GTTAGGGGTAATGTGATGCTTTGTGTTCTGAGGTAGATTCTCAGAGGGTGGAGGAGGGAG

AGGAGGAAGAGGTCTGGGATAGAGAAGAGGATGAAGGTCTGTGCTGTGCTGGAGATCTCA  
TGGTCCTGCCCCGACCATAAGAGGATGTTCTTCATGTTTCAGCCACGTCAGGGAAATGGGG  
AGGGAGCTTGAGAGGAGAAGGAGGACGGTTCTCTGGAGGGTTAGGCCAGTGTCTTCAAT  
TGTTTGGCACCGTAGGCTTGCCCCGAAATGGGTTCCATTCCCATGGCCAGGCCCGAGATC  
ACGGAGTAGCCGGTGATGTTGGCGAACCCGATCGAGAGGGAGCCTCCGGCGAGCTCCATC  
TCGCCTAGGTAGCCCAGGAAGACCATGG

>**Gmax\_MSTRG.89036.1** GeneID=Gmax\_MSTRG.89036;Strand=+;Pos=Chr17:11018480-11020414,

CATCAATAGACCAAAGGGTCGTTGTACCTATTCAATCTTGTAATCTTCAAGTCTGAAGTA  
TCACTGCTTTTCGTTACTACAATTACAAGTAGCAATGATATTCAGGACACATCCGAGATGG  
CAAACACTCAAAATGGTATTGAGAAGGGACTCAGCAAAATGAACATTGGAGTATATATAT  
ATGATCGTGTTTTGACTCTAGAGTAGTGTGTCTACGACTTCTATACGTTTCTGATTCTTC  
CTCACCAAGTGTTTTATACATGAATTTGGGGTGATAGAGGTTTCTTTTCACACTTGATCA  
TTCTCATGGTTTTCAACAAGTTCATTTACCTCATATCTTGAACTTGTTCCCTGTACCTGT  
GCGATACATACAAACGTTTGTGCCTTGGTAGCTTCTTGACCCAATTTATTCTCACAATA  
AACGTCAACAACAAAATCAAGCAAGCAACGATACCAATCAAGAGTCCTATAGTGAATCCA  
GCAAGTCCTAACCGAAGCTTGAAGGCAAAAACCAACCCCAACGGCAGTGTCAGGAAATAG  
AACCCACCAAGACTAGCATACATGCCTAGCCGGGGTCGTCCAGTTCCTCGTACTATGCCT  
CCACAAACCGTCACAGGAAAATTAACACTTCCACCAGAGCCATCAACAACATTGCCTTC  
TTCACACCCTTTACAACCCCTTTATCATGACTAAACAAATCCCCCAAACCCCTCTTGCA  
GCCACCATCGTGGAACCACCGATACAACCAGATACAACACTCAGTGCCAAAGACACACGT  
GCTGATTCACAAGCTTGACCGGCACGGTTAGCACCAAGCTCATTGGACACACGAGTGGAA  
ACACTAGTGGCTAGAGAAATCATCACTGCGTAATGCAAATAGTCAAAGTTCTACACTATG  
GCTAGAACCCCCACTGCTTGTTTTGCATTTGCTAGGTGGCCAGTAAGGAAAAGTAGAATC  
TCATAACACCACCACTCAAGGCACGTGTTGAGGCAGCATGATCCACTAAGCTTGATTAGC  
CTAATCCAATCCATCATGTTCTGATCCCACCACCCTCCTCCTTCCACAACAGGCCCTCA  
CTTCTTCTCTCAAGAACCACAACATAAATCGCCAGCATAACCATAACCATGAGATCGGTT  
ATCCAAACCGCAATTGCAACTCCTCGGAGTCCCATGGTTTTGGAGAGTACTATGTTGACG  
GGTATGTGAAAGGCTAGTGCCACTGCAGAACTAAACATGGTGGGAAGAGTCACGCAATGA  
GAGCTGAGGTAGGCTTTTAAGGGACAAAGGAGTGCCTTGATAACAAGTCAGGTATGAGA  
TTGGAAACATAGGTTTTGGCAACGGTTGAGATCTCTTGTTGTTGGCCAAAAAGAATCAAA

ATCTTGCCAAGGTTAAGCCACAAGAAAGATAAGGGAAGTGTTACCAAAAGCAACAAGAGG  
GTTGTCATGAGAAGGGTCTTGTGGAGAAGCCTCGCGTTCTTGGCTCCATGTGCTTGTCCA  
CAGATTGGTTCCATGGCGCCGCTTAGACCGTTCAAGACAGAGAAGCCGGTGACGTTAGCA  
AAACTGAACCCGAGCGCGCCACCGGCTAAGTTCAGCTCCCCAAGGTGGCCAAGAAAAGCT  
GTTGTTATGGCTAACTTGGCAAACCAAGCCAAGTTCATGGGCACAAGTGAAGGGCTATC  
CCTCGTTGGACTCTTAGCTCTTCTACCACCATCTTCACAAAATTGTTGGCATTGGAAGGG  
CATTTTTGGGTGTGTGATGAAGGAAATGAGGGTTGCCGTTGGACCAGTCGTTTGC GTT  
ATGCTCTCTCCTTTAGATGTTGCTGACATTTTTGCTGAGATGAATCAGATGATGTTTTGG  
TGAGATTGTTGCCAAGTCCACTAGCGTGTTCCTTTCTTTAATAGTATAAGATTAGATA  
AGGTTTAGACTTTGG

>**Gmax\_MSTRG.55217.1** GenelD=Gmax\_MSTRG.55217;Strand=-;Pos=Chr10:49042628-49043924,

TGGAAGAGTTTTCTTAAATTTAAGCAAATGCAACATACAGAGATCTTTTTTTTTTTGTGG  
AATATAGGGGCCTAAGCCCCAAACAATACAATAAAAAACCACAAGGGAACACGGTTGAGG  
ATATATCTGCTACAACAACATTTTATAAAAAAACGGAACAAAGTCAAAAATCGAACAG  
CGGCCATCTAAAGATAAATCAAAGCCAGCAAGCTTGTCTGCGACCTGGTTGCCCTCTCAC  
AGCGCGTGAGACCAGACAAAACTCCTCCTTTGACCTCAAATTCATTAATGTTCTTGATC  
AACATGAAACAAGGATGAGTATCGGGACACTCCTTAATAAGCTCAATGACCAGCAAGCTG  
ACTCAACTATGAACTCCTTGAATCCACGACTCCAAGCAAGCTGCAAGCCAAGAAAAATTG  
CCCAAAGTTCGGCTGCCAAAACAGAACAGCAACCAATGTCCGCAACGAAGGGGAATAAAA  
CCAATCCAGTGTGATCACGAAGGACTCCTCCAGCTGCTGGCTTTCTCGAAGCTGTATGAA  
CAGCTGGATCACAGTTCAATTTGAACTGATTTGTTGGAGGAGGGAACCACTGAATGCTAG  
AGCTAGTCACAGGATTAACAATCTGAGGAACCAAATCTATTGGCACTGCAAATCACTG  
AGATAGCATCAACCTGGAGCAAAATCTGATTTGCAATATCAATCAGCTGTAACAAGGAAT  
TATTATCAAAGATTCTTTGTTTCTATATCTCCAAATGTAGTTCAAAGCCACAGCAAAAA  
TCATACACCAATTTCTGCCATTAACCATCAAGTTACTAGTGACATTCTCAAGAAGTCTAC  
TCTTAACTCCTAAAGAAAGAAGTTTGAGTGCAGAGAATGAGGAAGAATCAAGTACCATA  
TGGCTCGAATAATGGGGCAGTGTCTAAAGCCATGGTCATTATTTTCTGAATCAGCACCAC  
ACCTTCAGCAAGCAGCATCTAAAGTTAGGTGGCAGGAGCACTTATTCTCATTTGTCAAAA  
GCGCATTAACCTCAATTTTCCAGAGTAAAACACACACCCTCTCTGGACCTCTCAATTCC  
AGATGGCAGAATACAATGGATCATTGCACAGAGCATTATTATCCAGTAAATTTCCCATCA

CTAGACCCCTTCAAATCACGATATCAGAGCCTTCAAGCTATTCGGGGGAGGAGTGGT  
CTCAAATATTTCCCATCGAATTTTGTTTTCTAATACATAATATGCATGGTTTATTGTAAA  
GGTTTAAAAAAATTACAAATCATAAAGAAAATATAAC

>**Gmax\_MSTRG.58091.1** GeneID=Gmax\_MSTRG.58091;Strand=-;Pos=Chr11:8554799-8555270,

TGCAAATCAAATAAACAAATATAAATTGCGCCCAATATAATTAAGAATCTGAATTAATTT  
TTCATGCTAATTATTATAGCAATCATACACATATAAGTATCAAAGTGAACCTCAACCTAT  
GAGCCAACCCAGCTCGCGGACTAAACAAATTATAAAAACGATGGCTCACTTTTGTAGCCGG  
TTGTCCTGGTCTTAACCTCGCTTAACCCATAAGCTGAGATGGTCCAACATACTACTATCCT  
CTTTTTTTTTTTTATTAACATACTTCTATCCTTGTAAGTGGTGTGATGACTTCATCAA  
CTAGGCAGTCCTTAGCTTTAGCAGCTTATACTGTTCTGTATCTTCCGAGTATAAGATGCC  
TTTGGGAGAAAGAAGGCGCTGGAGGGCCATTGAAAACCGAGCCTAACAAATCACATAAGAA  
TTACAAATCAGAATGCTTTAAGAACTAATACTCTTGACTCAGAAATGCTGGC

>**Gmax\_MSTRG.65157.3** GeneID=Gmax\_MSTRG.65157;Strand=+;Pos=Chr12:38511442-  
38511522,38511675-38511775,38511902-38512225,38549594-38549605,

AGGAGGTGTGGGGATGTAAGGTGGTTGAGATGTTGGAGATGGGGTTTTTGGAGGTGTAGG  
AGTGAAAGGAGGCTGAGAAGAAGGGGAAGGGTTTTTGGAGGGTTTGGAGTGTAGGGAGG  
TTGAGAAATAGGAGAGGGAGTGTGGAGGGGTTGGGACATAAGGTTGGTTGCCAGGGGA  
AGGTGTTTTTGGAGGAGTGGAACATTGGAGGACTATAAGAAGGAGAAGGTGTTTTTGG  
AGGTGTAGGAACATAGGGTGGATGGTTACCCGGGGAAGGAGCTATTGGGGGGGCGTAAAT  
AGGAGAAGGTGTTTTGGGAGGTGTTGGAACATTAGGAGGAGTATAAACAGGGGAAGGAGT  
TTGTGGAGGAGTTGGAATAAATGGAGGATGATTAGTAGGTGAAGGTGCTTTAGGAGGAAC  
ATAGGGAGGACTGTGAATAGGAGAAGGTGTTTTTGGAGGGGTTGGAACATAAGGTGGATA  
AGGAATTTTTTGGAGGAGTTTGAGGAGGAGTTGGAATAA

>**Gmax\_MSTRG.104177.8** GeneID=Gmax\_MSTRG.104177;Strand=+;Pos=Chr20:36605721-  
36605828,36606807-36608312,36608596-36609133,

CGCCATTTCTTATTTTACTGCATTAGCTTAGTTACCTTAGTATAGCAATCCTAACAGTT  
CTTGCTCAAATTTTTCTTTTCAGGAATATTCGATGGATTTTGACATAGCCATAAAGAC  
TTGGAAGTGGAGGCAAACCTGTTTTTCCCAGTTTGTACAACTTGTGATGAGAGATAGCAT  
AATTGTTTGGCAGAAGGCACAGTCAGTATTCCAATCCAAAGGCCTTTTCTCTTAATTG

TAGCCAGAAACCCAATATGGCAGCCATTGGAATTCCCACAACATAATAAGCTCAAAGGTT  
TACATATGCTCCTATGTGCTGCCACCCACATCCTCTAGCAATACCTATAATGAAGGCATA  
ACTCAGATTCCATTGCTTAAGAAGAGTAATGTGCATTGAAAAATAGTTCAAACAAGAACT  
AACCTGAAAGGGTACCGTGTAACGTGTCTACTATAACAGATATACTTAAAAGAGGAACCA  
TATCTGTGACATAATCCACCACATCCTGCTCATTGCTAAATACATAACCTAAACCTGCC  
TGCTAGCAAAAATGATTGAGCTCACCAGAATGGCCTCAGAACTGCTAGAGTCATGGCAG  
CAGAAACAGATACTCGTGCTGATTGTGGACTTCAGCTCCTAATGCATTTGAAACTCTAG  
TGCTGAACAACCCGCCCAAAGAGAAACCAATCAGAAAGAGGAAAAAATTCATTTACTAT  
AATATCATTCTACATGAATACGAATATGCACAAATTGATGAGCTTAGGACTTGTGTGAAT  
CAAAACCTTGCTGCTGAGCCAATTGCTTCTGGGATTGTGTAGATAGTTGTGATGATGGAT  
AAACTGGTCAGAACATAGTTAACAATAACAACAAATTAGCAACACTTGCATGAATGGAAA  
TCAAAATTTGGCTGAGTAACAATTTCAACACAGATTTTAAACACAAAGCCATTCATGTC  
TGAAGGACTAGGATAAGTTGTACATACCATATGGATAAGACTGAAGTTTCAAGCTCTGGA  
TTTGGTAGAAGACCAGAAAGCAAGGTTAGCAGCTCAAATGACCACCACTCAAGGCTGCAA  
CGATCAAATAAGTAAGAAACATACCATGGTTGAAAATTAAATGGGAAATAAAAAACACAAC  
ACAAAAGATAAAATATAAGAGGAAGAACTCACCAAACCATTCAGCTGAAGGAATAGCA  
TAGGTGAAGAATTCACCAATCCCATGGAATAGTTCCATTGAAATTGGGACTCGAGTCCTT  
TCACATTCAGTAGAGAATTCATATATAAGCCAAGTAAAATCACATTCAGCCAGTATGAA  
GTACCAATTGAAAATGCTGCTCCCAAGTTACCAAATCCAGATTTAAAGACCATTAACCAA  
CTGAAAGCCACATGGAAGCAAAGAGTAATGGAGGAACTTATGACAAGGGGACTGATCAAA  
CTTTGCATCAAAAAGAATCGAATCAAGGCCTGAAGTGTTGCATAAGCAAAGAGAGCAGGG  
ATCATGCACAAAGCAAATTTTCCAGCTTCTTGTGAAATCGAAGGGTCTTGGCCAAGAAAT  
ATGAGTATCTTCTCCAAGTAGACCCAGAAAAGAGTCAGAGGAAGACAAGCTAAATAGTAG  
GTCTCAAAGCTTAAGAAGAAAGCAGTGAGATGGGAAAGGAAGAGACTTACAATAAGACTG  
AAGCCAGAGACAGCACAGAGAGAGATGGCAATGGCTGTGCTAGAGAGAGCAAGCTTACCC  
AAGTGACCAACCATCATCATTGAAATAATCTGTAGAAAATACTGTGACAAAGTCACAGTA  
ATCATAGGAGCTGCTAGATAACCCACTCTTTTCATTTCTGAGAAAAGACAGTCCATGTT  
ATGGCTGAAGCTGAAGGATTCTCCGGCTCTGAGTCCTTATCTAAGAGACTATTTTCCATA  
TCCTCTCAAAGGGTCACAGAATCACTGCACCTGTGCGAACTGGTAGAAAATAATGGCAG  
GGCTTTGGTGTTTTGTATGCTAAAAGGTTTAAATATTTACAAGTGGCAGCAGCAGTAGTT  
CTTCCAAGGTTTAAATATTTGTTTCAATAATGACTGTCTCAGAGTCTCTCATGGGCTTCC

CCCTCTTATGTAGACGGAACAATATTTCAAGTAAATTTTAAAATTTAAAATC

>**Gmax\_MSTRG.70935.3** GeneID=Gmax\_MSTRG.70935;Strand=-;Pos=Chr13:37706552-37706619,37707015-37707220,

AAGAGTAGCACCAGCAAGCTGAAGATCACCAAGGTGGCCAGCGAAAATTACAGAAACCAA  
CACGATTAAGTAATAGAACAAAGTTTGTAAAGGAACATAGGTAGTGAAAAAGTAATTGATG  
TTTGGCCTCCTCCAAATCCAGGATTTTGCTGTTCCACCATCGGTACTGTCTTGTGTTTT  
TTTATGATGAGATACATCTAATAGAGGTGTGAAGTGTGTTACTGTGCCATCTAAACTCCT  
GCTTTTCAGCATCTTCTATAATCTCTTTGCTCCT

>**Gmax\_MSTRG.33766.1** GeneID=Gmax\_MSTRG.33766;Strand=-;Pos=Chr07:9484568-9484827,

AAATTGTGAATCATTCACTCTCCACTGCTAATTTAGTCTTTGGTTTGATTTAACAGCC  
CAATTATGAATCTACGAGGGCACTTTCCTTTTATATACAAAATAGTTGTACCAAAAAAA  
TGTTCACTAAAACTGCTTTTCTAAATAATCAGAATCACTAAGCATAATTACTGTTCAAC  
TGTCGAAGATTTTAATTTTGGTCACTTGGCAGTGCATTTGCATCAGTTGGCACTCCGTTG  
CTTCTTATTCTTTTGTGC

>**Gmax\_MSTRG.55224.1** GeneID=Gmax\_MSTRG.55224;Strand=-;Pos=Chr10:49057222-49057518,

TCAAGGATCGGCTATTAAATGAAAAATAGTTGGCATAGCTCAAATTACATTTTGCATTC  
GAAACATTGCTAAACGTTTAATCCTATTATCATGACAAAAAATGCTACTATTATTCTTTA  
ATCAGATGCACGAAGGTACAAGCTCAAATAGCTAACCCTTCCAAAAAACCAAACTAA  
ACTCCTACTCCTCACTCACGGAATAAGTCCCCATCTTTAGAAAATTGGCCTTTGAGGGC  
TTGTCATACTCATACCAATATATTGTCTGCTGAAATTTTTTCATCAAATAACCTCTT

>**Gmax\_MSTRG.33765.1** GeneID=Gmax\_MSTRG.33765;Strand=-;Pos=Chr07:9481346-9481877,

CAGACCATGAGTGCTGAAGGAAAAGCAAGACTGAGAAATTGAGGAATGTTCTGCAAGGAT  
TCCCTTGAGAAACAGTCCAAGTGCTTTTGCAGGAAGAGGAGAACCTGATGTAAAGTGCT  
AGTAGCACCGTGTTAAGCCAATTTGAAATGCAAAATGCAATGGCAGCTCCTTTGATGCCA  
AGCCCAAATTTTAGAACCAAAAGCCAACAGAGAAGGGCATGTGCTAAGGTAGTGAATCCA  
GAAGCTAGCATCATTGGAAGGACAATGTTCTGGGTTTGTAGGAAGTTAGTAATGCACCGA  
AGAAGAGCGTTGGCTGAAAGGCTTGGGATCAAGTATGTGGCATATAGTTGAGCTTGTGCT



GCAATTGTTTTGTCTTGATGCAGAACAACCAGAATAGGCCTCAAGTATGCCCAAATAAAA  
GACATTGGTATAGTAGCAAGCATGATGATCACTATGGCTCTCTGCATGTGTATGCCAACC  
ATATGATACTGCTGTGCTCCATATGATTGACCACAAAATGTGTCAAGTGCAC

>**Gmax\_MSTRG.85659.1** GeneID=Gmax\_MSTRG.85659;Strand=-;Pos=Chr16:34078020-34078271,  
GCACTGATGACACCTTGGTAAACAGAGATAGAAGAAAGTTCAATGTCTCCAAGATGGCCA  
GCATAGATGGAAGTTGAGGAGATTGTGAGAACTGAAGCAGTGCAGACAGTGCCATAGGG  
AATGCTATTCTCCATATCTTCACTGTCTCTGTCCACAAAACAACTTCAAATCCTTCAAG  
CTTTTACCGGCAAGTAGTCAGATTCTGAAGTGAAGTTCTGGATCACTAAAGGTGTCTCC  
ATTTGAGGAGTT

>**Gmax\_MSTRG.10861.1** GeneID=Gmax\_MSTRG.10861;Strand=+;Pos=Chr03:460202-  
460230,465916-466105,  
GTTTAGTAACAAAGAACTGCTAACAAAGGTGACAAATCCCCACAGCAGTAGCCACATC  
TTCGTTTGAAGTAAAGAGATAAGCTACTTTTTCTTTAAATTAAGAAAGAAACAAATAA  
GATAAACCCAATTGCAAATGATGTAAGCACTGTCACAACTATAGAGAACTTTGCAGCTTT  
GGAGTTTTCCCTTCCAAGTTCATTTGCCACTCGAACACT

>**Gmax\_MSTRG.10860.1** GeneID=Gmax\_MSTRG.10860;Strand=+;Pos=Chr03:459418-459671,  
AAAATATATCAATCCAGAGACTAACTTAAGGAACATTCAATACTTTAAGAACTACTTGTA  
TAATTTATAATTTAATTAATTTAAGGACTATTTGGGAGACTACATTGATAGTTTATTCAA  
ATACCTATCAAGCAATCTCTTGGCTATATAACACCGGCTAAACAAATAAGGACGATATAG  
ATTAGAGTCTGAACTAATTATCTGATGTAAGTGTTCACGGTCAAGGTCCACCTTAGAC  
CACTTACTAATACG

>**Gmax\_MSTRG.91145.1** GeneID=Gmax\_MSTRG.91145;Strand=+;Pos=Chr17:40286874-40287099,  
GTCCGAAAATGCTAGCCATGTAAATCCACTCCATGCTCCATCTGACTTAGTGATGAAAAT  
GTACAACAATTGTGCAATCACAATCACCCACCATGATGTATTGAGAGTAACTGCTGCTCC  
AATTAGGCCCCATCCAAGCTTAAATATAACAAGCCAACTAAAAATGTGTGCAGCACCAA  
AACAACACTGATATCCATAACATCACCAGCACTTTCCTCTGTGCC

>**Gmax\_MSTRG.58088.1** GeneID=Gmax\_MSTRG.58088;Strand=-;Pos=Chr11:8549475-8550036,

ACCTAAAGCAGCAAGCTCAATTGAACTTCTCTGACCAATAACTGCAGTATCGATGAGACT  
CATAAGTGGTCCACATATCCAAAGTCCAGTTGCTGGTCCTGTGAACATCACAATTTCTT  
TATCTGATCCCATATGCCTTGCTTCGCGAGTTCCTTTTTCTCACCTGCCTCGATATTTCT  
TTCGTTGTCTTTCTTCTTCTTGTTCAGAGCCTCAGTGATCTGGTCTTCGTCTTGGCT  
TCGAGCGGTTACGAAGAAGCGATGGCGATGAAAGGTGGACGCTGAGGCTGCGCCGGATAG  
GCACAGGGTGGGAGGAATGGAAGGTGCGAAGAAGCGACGAGAAAAGTGATGGTTTGAGAG  
TGTTGAATTAGGGTTTTGGCGGAAGGGGAGTGAAGAGAGCAAAGGAGAGGTAGTGATTT  
CAGTTTGAAAGCCATTTTCGGTGTCTAACTCTGGTTGGGTGGAGGGAAGGAAAAAGGGAA  
GCTGAATAATCCCTCCCACCAAACACAGGCTGAGTGGCTCACGATGGTAACTCATTATC  
TAGTATATAGTAGTGTTTTCTT

>**Gmax\_MSTRG.85378.1** GeneID=Gmax\_MSTRG.85378;Strand=+;Pos=Chr16:31798250-31799600,31799844-31800091,

AAACACAGCCTGCAAGTGCCATTGGGACAGTGTACATCATGCTAGTTGTCTGAATGAGAA  
TACCAGTGGCAGCCACAGCCAGTGTGGACGTGGCAAGTACCCAGCCAGCACAGTCACAA  
TCTCGTACCACCACCACTCCAAACATATCATAAGGCAACTAGGCACAGCAAACCCCATCA  
ACTGCCCCAACCCAGAGCACACCACTCCCCACCACCACACCGCCACTTCAGCACCACT  
CCCTCTTCCTGCACACGCACACATACCCTGCCATCAGCACCACTGTTTAGATTAGTCA  
TCACTGAAGCCATGGCCACCCCTGGTACCCCAAGCCCCATCACCAACCAAAAAGATAGT  
TCAATGGCACATGGAACAAAACAGCCACAAGGGAGCAATACATCATAGGTTTGGTCACTT  
TTTGTGACCTCAAAAACACCCTTAAGGGTTGTAGTAAGGTGTTTGTTAAAAGGTCTGGGA  
GAGAGTAGAAGCAGTAGAGTGATGCCATTCTGTGATGGCACTGTCTTGGCCCATGAAAA  
GCATGATCCTTTGAGGTTTCAGCCACAGGAGGCTTATGGGGACTATTGCCATGAGGAGGA  
TGAGGACCATTCTGTTGGAGAGAGAGAGAGAGAAGGTCCCAGTTTTTGCTACCAAAGGCTT  
GGCTGCACACAGGTTCTAGGCCTGCTGCAAGACCCACAAGAACAGAGTACCCTGTTATGT  
TGGTGAAGCCTATGGAAAGTGCAACACCTGCTAGCTCTAGGCTTCCAAGCCTACCCAAAA  
AGAGAACAGAAACCACTGCTCTCACAAACACCAACATGTTTCATAGCTGTGATGGGTAGAG  
CCATGCCCCACAGCTCCTTCATCTCTTCATCACCTACTTGGCAACACAACATCACATGA  
CTAGAACACAAATAAGAAAGGATAAAAAAAAAAACTCATTTTTAAAACAATAGTCTTTTTTC  
TTTTTACTGGCATCAAGGTTCTAAATTACGGTTAAGGTCACAATAATTCGTCATGTTCT

TTGATATTGTGGGAAATTACATACACACAAATGTGGTAAGGTCTATGTGATCACCACAGG  
TTGTTTTGCAGTAGCAGACACTCGAAAAACCTTATTGTTGCGAACGAAATCGCGCGAACC  
GGTTTTTAAAAAGCCTTGACTTGATTTTAGCATCATGGTCGAGTATCTCTAAAAGAACT  
ACTCTTTTTCTCTTACAAAATGTGTTTCCATGGAGAAGTAAGTAGCAACATGAGTTTACC  
TGAGAGGTTGTGGGGAATTTGTGGGAAAAGAAATCATGGTCCTTGTTATCTCCCATTCTT  
CTTGACCAATATATGTATGTGTTGTTGTTCTTTTTTTTTCTCCTCCTTATGCTCCTTCTC  
TCTAAAACTGAAAAAAGGGGTGAAGCAAAGGGTGTGTGACAAGAAAGAAATGCTATGAG  
GGAAAAGGGGGGCACTTAAGTAGAGCAACCAACATAAACAGTGTGGTATAGTATGGCTCA  
AATACTTGAAAAAGTTTCAGTCTTTCATAATTCTAAGTATTTGTCAAAGGTGTAAAA  
ATAATTAAACATGAAACGTAAGGTCAATAATAATAATAA

>**Gmax\_MSTRG.17618.1** GeneID=Gmax\_MSTRG.17618;Strand=-;Pos=Chr04:8842303-8842915,

TGTCATTTAACCAATTGGATTAGTGGATTGTGTAAATTGAATTATGCGGATTGGAGTACA  
TAACTCAATTCATCTCATTAGGATAAGCTAAATACTTTATCTGTGAGACCCAACCTATTA  
CTCCTTTTATCTCTTCCCAAAATGTGTGTTGAAACACATTCGACCAAAGAGAGTTAACTT  
CCTCTCCATTATGGCATGGTCTAGTAGGAGAGACATAAACACATTTACAAAACTATGT  
GCGTATCTCTTCTACTGGTCTCTATAGCAATAAATGAAGACAATCCAGTTCCAAGCAAAA  
AACACGACATAAAAAACATGAGAAAAGGCATCCTAATCTTTTCCCCTCATCATCATCACTC  
TATACATAGATTGTCCCTCTGTTCAAGCTCAACTTCACTATTATCAGTGATTGAAGACGA  
CTCATCCAATTTACATACTTCACAAGCTTATGAATCCATCATATCTTTTCCACATTAT  
CTATAAGTTCCTCTTTCAAACCCATTCCGAAACACACCAGTATAGTAGACGCGGAGTTTT  
ATTTGAGCAACTGCGTCTTTTACAAGCTCCCGTTGCTTCTGTGTTAGAAAATACTTT  
AAGAGTATTCACC

>**Gmax\_MSTRG.64518.1** GeneID=Gmax\_MSTRG.64518;Strand=-;Pos=Chr12:35569920-35570159,

CCAGATAAGACGGGTTGAATGCCATTGAGGACAAGAGAAAGGGCAAGGAGTGGACAAAGA  
TCTGAAACTGCAGCAGCAACCTCTTACCCCCTGTGAAGGCATAGCTAATGACATCTCTT  
AATGCAAGAACCACAGTGCTGCAATTACTGATATTATGAAAGAAATCACTGTCACCACA  
ACCACCGAAAACGATGCTGATTTTGGACTTCTTGCTCCTAGTTCGTTGCTCACCCCTCAG

>**Gmax\_MSTRG.85378.2** GeneID=Gmax\_MSTRG.85378;Strand=+;Pos=Chr16:31798250-31799600,31799843-31800091,

AAACACAGCCTGCAAGTGCCATTGGGACAGTGTACATCATGCTAGTTGTCTGAATGAGAA  
TACCAGTGGCAGCCACAGCCAGTGTGGACGTGGCAAGTACCCAGCCAGCACAGTCACAA  
TCTCGTACCACCACCACTCCAAACATATCATAAGGCAACTAGGCACAGCAAACCCCATCA  
ACTGCCCCAACCCAGAGCACACCACTCCCCACCACCACACCGCCACTTCAGCACCACT  
CCCTCTTCCTGCACACGCACACATACCCTGCCATCAGCACCACTCATGTTTAGATTAGTCA  
TCACTGAAGCCATGGCCACCCCTGGTACCCCAAGCCCCATCACCACCACCAAAAGATAGT  
TCAATGGCACATGGAACAAAACAGCCACAAGGGAGCAATACATCATAGGTTTGGTCACTT  
TTTGTGACCTCAAAAACACCCTTAAGGGTTGTAGTAAGGTGTTTGTAAAAGGTCTGGGA  
GAGAGTAGAAGCAGTAGAGTGATGCCATTCTGTGATGGCACTGTCTTGGCCCATGAAAA  
GCATGATCCTTTGAGGTTTCAGCCACAGGAGGCTTATGGGGACTATTGCCATGAGGAGGA  
TGAGGACCATTCTGTTGGAGAGAGAGAGAGAGAAGGTCCCAGTTTTTGCTACCAAAGGCTT  
GGCTGCACACAGGTTCTAGGCCTGCTGCAAGACCCACAAGAACAGAGTACCCTGTTATGT  
TGGTGAAGCCTATGGAAAGTGCAACACCTGCTAGCTCTAGGCTTCCAAGCCTACCCAAAA  
AGAGAACAGAAACCACTGCTCTCACAAACACCAACATGTTTCATAGCTGTGATGGGTAGAG  
CCATGCCCCACAGCTCCTTCATCTCTCCATCACCTACTTGGCAACACAACATCACATGA  
CTAGAACACAAATAAGAAAGGATAAAAAAAAAAACTCATTTTTTAAACAATAGTCTTTTTTC  
TTTTTACTGGCATCAAGGTTCTAAATTACGGTTAAGGTCACAATAATTCGTCATGTTCT  
TTGATATTGTGGGAAATTACATACACACAAATGTGGTAAGGTCTATGTGATCACCACAGG  
TTGTTTTGCAGTAGCAGACACTCGAAAAACCTTATTGTTGCGAACGAAATCGCGCGAACC  
GGTTTTTAAAAAGCCTTGACTTGATTTTAGCATCATGGTCGAGTATCTCTAAAAGAACT  
ACTCTTTTTCTCTTACAAAATGTGTTTCCATGGAGAAGTAAGTAGCAACATGAGTTTACC  
TGAGAGGTTGTGGGGAATTTGTGGGAAAAGAAATCATGGTCCTTGTTATCTCCCATTCTT  
CTTGACCAATATATGTATGTGTTGTTGTTCTCTTTTTTTCTCCTCCTTATGCTCCTTCT  
CTCTAAAAACTGAAAAAAGGGGTGAAGCAAAGGGTGTGTGACAAGAAAGAAATGCTATGA  
GGGAAAAGGGGGGCACTTAAGTAGAGCAACCAACATAAACAGTGTGGTATAGTATGGCTC  
AAATACTTGAAAAAAGTTTCAGTCTTTCACCTAATTCTAAGTATTTGTCAAAAGGTGTAAA  
AATAATTAACATGAAACGTAAGGTCAATAATAATAATAA

>**Gmax\_MSTRG.20765.1** GeneID=Gmax\_MSTRG.20765;Strand=-;Pos=Chr05:132197-133379,

TGAAGGCTGAAGCATATTCATTAACTTGTGGCATCTGATTTATCAGACGCCAGAGGCAC  
AAATCCAGTACAAAAATCCCATCACATATTCACACCAACAAGTTGTGTATGTTAACATAA  
TTAAATCTCTTCACCAAAAAACAGATACAACTGGGCCACACTCACTATCCTCTATATGA  
CTCTATCTTTCCACTCCACCGCAGATGACAGTCCATGCAGAAACCAAACATCATTTATT  
TTTCAGTTTTCTTAAGCTTCATAGTGAACTTTAATTGAGTTCTCAACTACTCTCTCCCTC  
GCTTTAGTTGCCTGCAGCAACCACAAAATACAGTCATTTAATTGAATTTGTGGCAAATAA  
TAACTAGCTAGTGTCTTAAGAATATTATGTTTTCAATGATTTTTTTAGGCTCTCCTATGA  
TCCACATAATAAATATTTTTCATTTTTAGTTCTTTAACTAATACTCTAAGAACACGGGTT  
AGCATTTGTGATATTTGTACAGGTTACGTAATGTAAGGTATGGAATGAACGAACCTCTTT  
GTGCCAATCTGTTAGTGCTGTTACAATAGCAAGAATAATGACTTGTGTAAGAGAGCCTGA  
TAGAGTTCCCATCCAAAGGCCCTTGGCTCTTAGTTGCAGATGAAAACCAATAACAAACC  
CATTGGAATTCCCACAAGATAATAGGCTCCCAGGTTACATAGGCCCTATTTCTGGAA  
TCCTCCCCCTCTCGCAATCCCTGATAGTGCTCCAATTAGACTATCGGCAGTAACAGACAC  
ACACAAGAGTGGAGCCATCTCTGCAACGTAATCGATTACCTCCTTATCATTGCTGTACGC  
GTATCCTAATACATGTCGGCAACTAATGAAGACACTGCTCACAATAACTGCCTCTGCCAC  
CCCGAGAATCACAACCACTCGAACTGCACCTTTTGCTGTCTTTGGATTCCCTGCCCCCAG  
TTCATTTGAAACCCGAGTGCTGCAAACATCCATCATCAGATTAAGTGTGTTGGAAGCCCC  
AAAAAAAGGCAAATTTGGACCAAACCTTTTTTACCTTGCAGAGGCTCCAACAGCATAAGG  
AATAAAGTAGTGCAATGTGGTTGTGTTAAGGCTGCAAGAAGCGTATGAATGATCAAAAAG  
TTAATTAGAAGATCACGAGTTATTTACAGCAAGGGTATTCTTAG

>**Gmax\_MSTRG.70935.2** GeneID=Gmax\_MSTRG.70935;Strand=-;Pos=Chr13:37706547-  
37706792,37707188-37707391,

AAATTTTCCTAGCATATTGCATCATTGTTAAAGTAGCTAGCACCAATCTTATTATAAAAC  
TCAACAATATTGCTTATCATACATGATAATTCATTTCACTACATTCCTAAAGAAATTCTG  
AATATAATTTACCATGACAGCCAAACCAGTGACAGAAAACCAAGAGTTTGCAAGAGTAGC  
ACCAGCAAGCTGAAGATCACCAAGGTGGCCAGCGAAAATTACAGAAACCAACACGATTAA  
GTAATAGAACAAGTTTGTAAGGAACATAGGTAGTGAAAAAAGTAATTGATGTTTGGCCTC  
CTCCAAATCCAGGATTTTGCTGTTCCACCATCGGTACTGTCTTGTTTCTTTATGATG  
AGATACATCTAATAGAGGTGTGAAGTGTGTTACTGTGCCATCTAAACTCCTGCTTTTCAG  
CATCTTCTATAATCTCTTTGCTCCTATTTT

>**Gmax\_MSTRG.85657.1** GeneID=Gmax\_MSTRG.85657;Strand=-;Pos=Chr16:34067788-34068140,

CTGACATCACCTGTGAAGCACTATTGAGAACAAATTGTTACACCAAGAAGGTATGCTAAAT  
CAGCAGCAGCTAGTATCATATCCTCACTGTCGGTAAAGATTTTGGCAAACATCATCTTTAC  
TAAAGAAAATTACGGTCATGAAAAGAATACCAAGGAGGAGAGACTGGAACATTGTCACAC  
AGAAAGAGTATATGGCTGCTCTTGGATGCGACATGCCAAGCGTATTGGAGACACGAACAC  
TTGGAGGGTATTGAACCAATAGTCAGTGTAAGAATGAAACAAATACATGAAAAATAGATG  
TCTATGTCTTAGTTCGGATAAATATGGAAATTTTGGTTTTAGTTTATGAAAAC

>**Gmax\_MSTRG.10723.1** GeneID=Gmax\_MSTRG.10723;Strand=-;Pos=Chr02:48386690-48387375,

TATCTTGATGTGCATTGGAGTAGATTAGTGTAGAGAAGAGGGGCAGGAGTGGAATTGCA  
AAGAGAACCGGCTGCAGTGTGAGGAAGAGAGAGATGGGGGCAAGAAGTAAATTAAGAATG  
ATGGCAGTGATGCATGAGGGGATGAAGGAAATTAGAAGGAGCGTGACCTACATGCCTCGA  
CCAGGGGGATGAGGTGGTGGAGCAGGTGATGGAGGCGATGAGGCGTGTGCCGGAGGAGGT  
GCTGGATTCGGGTGGTTTGAGGACTCCGGTGGGTGGGGGTGTGAGGGACCTCGATCTCTA  
CGCTTCGCGAGAACACCGAGGTCGTTCTGGCGTCGTCGAGAGCCTCGAGGTTATGTCCA  
AGTAATATGCCTTCGAGCAGTTATTAGAGTACTCCCCCTTTTTGTAATAAATAAACTT  
CATTTTCTATTGCTATTTTTTACCTGGGTGGAATCCTCACCTGTAATAATTCGGCTTA  
ATTTTCATGTAATTATGTTTGCTCAACCAAAGAATACTTCTCTATTCTCCTATTTCGCAT  
AATCTGTAATGTAATGACACTGCCTTCCACCCCTCCGTAACATTATTAATAACTAAAT  
TGAACCATTTTCCTTTACACTGTAACATTGACTGGAAAAATGACTAATTCATTGCGAGA  
ACCTAGAAAGTGCTTCTAAAATGTCC

>**Gmax\_MSTRG.10863.1** GeneID=Gmax\_MSTRG.10863;Strand=+;Pos=Chr03:469768-470173,

GGCGAAGCGTATGATGACAGTGAACACAAGGGCATAAGCAGCGAGTTCCTTGAACCAAT  
ATGACCAATAAATGCTTGGCTTATAACACTGATGCCAAAGGTTGTGAACCTTGTGAATAT  
GGCTGGTGCTGCCACTATCCACATCACCTTGCTCTCTCCACACCCTCTTACCAATGA  
TAAATTCTCTTCTCTGATTTTTGCTCTCTGCTCAACAGCTTCTTCTCAAGATTCCCCTC  
CATTTTTTGAGTCTTTGGTTGTTGTTGGAGCCTCTGAAGATGGATCAGAGACTTCACAGT  
ACACAAGGGAGTTTTGGGCTGATATTATACAAAAGAAAAGGAAAAAAGAAAAAGAATG  
AGTATCTTATCGTTGCTCTTGCATGAGAGGGACAGCAACTAGACAC

>**Gmax\_MSTRG.6396.1** GeneID=Gmax\_MSTRG.6396;Strand=+;Pos=Chr02:7920926-7921612,

AAGTTGTGGATTAGGTAAAAGCCCAGCAAATAATGTAAGTAGCTCAAACGACCACATTTCT  
AAAACATGAACAATGAAACAATTAAGAAAATCAATTAGGAGATGACTAACTGAAAAAA  
CAATTGTGCAATGTCATAATACATTACCAAAACATCAGTCCAGAAGGAATAGCAAATTGG  
CAGAACTCTGGAATGCTTAATAAAGCATTAAAAGAAAACACAATTTTGGTTTTCTCACAT  
GCTGGAGAAAAATTCATATAAATTCCAAGCCCAATGACATTTAACCAATATGAAATTCCA  
ATAGCATATGCTGCTCCAACATGTCCTAGGGCTAATTTGAATACCAAAGCCCAACAAATA  
GGAACATGCAAACACAGAACCGCAATTGAGCTGAAAACCATGGGAAAGATCATACTCTGA  
GTCTGGAAGTAGCGAATCTGACATTGAAGAACAGCAAAGCCATACAATGCAGGGATGGAG  
TATATGCAGTACTCATGAGCTACATGAGAAATTTAGGGTCTTGACCAAACAACAATAGT  
ATTTTATCCACGAATATCCACAGCATAGATATGGGGAGACAAACCAAAGCAAAGTCACA  
ATTGCACAAAAAGTGTAGTTTCCAATCTCTGAAAATTCTTCTGCACCATAGGTTTGGCCA  
CATAAAGTTTCCAATGCACCAGCCATT

>**Gmax\_MSTRG.85661.1** GeneID=Gmax\_MSTRG.85661;Strand=-;Pos=Chr16:34079744-34079972,

CCTGACATCACTTGTGAAGCGCTATTGATAACCATCGATACACCAAGAAGGTATGCTAAA  
TCAGCAACAGCTCGTATCATATCCTCACTGTCGGTAAAGATCTTGGCAAACATCATCTTTA  
CTCAAGAAAAATGGCAATCATGAAAACAATGCCAAGGAGGAGAGACTGAAACATTGTCACG  
CAGAAAGAGTATATGGCTGCTCTTGGATGCGACATGCCAAGTGTATTGG

>**Gmax\_MSTRG.6401.1** GeneID=Gmax\_MSTRG.6401;Strand=+;Pos=Chr02:7932706-7933126,

CCAAAACACTAAACCCAGAAACATTGGTGAGAGAGGTTGCAATAGCAACACTTGAAAGAG  
AGAGCTGGTTAAGATGGCCAACCATTAAGGACACCACTGGCAAAGGTATTGTAACA  
CACTTGAAACCGCCATTGGAGCTGCTATAGTACCCACCTTCTTCAGCTCTTCCCTCATTT  
TCATCCATCCCCACTTTCCTGTCGAACTTCTTCCATCACTGCACCCTTTTATCATTTTT  
GTACGATCAATTTTTACTCTTTTATATCACTCACTTTCAAGTGTTATATATTATTACCTT  
TTCTTCTATATGTCGATCTTATCCTTCTTTGGCTCTGCCTCTACCTTTGTCCTCTTTTGT  
ATCATCACAACATAACACAACCTTTGCGTTATCTTTTTTCAAGTCACCCACGCAACTATACCT

T

>**Gmax\_MSTRG.47707.1** GeneID=Gmax\_MSTRG.47707;Strand=+;Pos=Chr09:40376755-40377191,

CACCCATCCATCAGTTTAACTTATGAAGGAAAAGAGAACTAACATACCAATAAACTGAA  
ACCTGTGACAGAGGCCAAAAGAAGTGGCCATGGAAGCACCAGAGAGAGACAACTCGCCAAG  
ATGGCCAACAAACATGACAGATATGATACTGAGGCAAAAATTCAAAGGGTCACTGATAT  
CAAAGGCCCTGCAAGCCATAACTGCTTCTTCACTTCTTCTATAACTTCCCTTCTCTCAAT  
ACCCCTCCCTGATGATGATGAGTGTGAGTGCTTAATCAATGGAGACTGAAGAGATGCACT  
TTGGTTTTGGTCTCCTCTCTCCATTTCTTCTTTGTTGCTCTTAAGTTCTTAACACAT  
GGAAGACTCAGACAGAGAAAAATGTTGCATATTGCATGGTGTGTTAAAAAGATTATAAA  
AACATCTGAAAACTCT

>**Gmax\_MSTRG.65157.2** GeneID=Gmax\_MSTRG.65157;Strand=+;Pos=Chr12:38510925-38511374,38511462-38511524,

CTACAACATAAAATTAATTATGAGACACGATCTCATCTGTCCAAAATAACAATATTAGCA  
AAAAAATGAAAATGTTCACAATTACTATATACTATAACTCAAGTTCCAAAAACAAAAG  
TTTGATTTTTCTAACCAAGAATGGTGCTTAGAGCAGCACCAGCCAGAATGGTCAGTGAAT  
ACAGCCCTAACCTCGACGGTGCTACAGACGACGCGCCGTTTGGTCTGGCTGGCGTCGTTT  
CGTTGACGCCCCCGACGACGACGACGACGACGGTGAGGGAGTTGTTGCTGCCGGAGAAA  
TGGTGGGAGTGGTGGCTGACGTCGACGGGGATGGTGGCGATGTTGCCGGAGCCAGGTAGG  
AAGGTGGGTAAGTGGGTGCAGATGAAGGTGAAGGTGAAGGTGGGTAAGATGGAGAGAGTG  
AGGTTGAGGGAGGGATGGTGGATGGATAGGGTGGTTGAGATGTTGGAGATGGGGTTTTTG  
GAGGTGTAGGAGTGAAAGGAGGCTGAGAAGAAG

>**Gmax\_MSTRG.65157.4** GeneID=Gmax\_MSTRG.65157;Strand=+;Pos=Chr12:38511442-38511522,38511675-38511823,38511902-38512515,

AGGAGGTGTGGGGATGTAAGGTGGTTGAGATGTTGGAGATGGGGTTTTTGGAGGTGTAGG  
AGTGAAAGGAGGCTGAGAAGAAGGGGAAGGGTTTTTGGAGGGTTTGGAGTGTAGGGAGG  
TTGAGAAATAGGAGAGGGAGTGTTTGGAGGGGTTGGGACATAAGGTTGGTTGCCAGGGGA  
AGGTGTTTTTGGAGGAGTGGGAACATTTGGAGGACTATAAGAAGGAGACGGTGTTTTTGG  
AGGAGTGGGAACATTTGGAGGACTATAAGAAGGAGAAGGTGTTTTTGGAGGTGTAGGAAC  
ATAGGGTGGATGGTTACCCGGGGAAGGAGCTATTGGGGGGCGTAAATAGGAGAAGGTGT  
TTTGGGAGGTGTTGGAACATTAGGAGGAGTATAAACAGGGGAAGGAGTTTGTGGAGGAGT  
TGGAATAAATGGAGGATGATTAGTAGGTGAAGGTGCTTTAGGAGGAACATAGGGAGGACT



GTGAATAGGAGAAGGTGTTTTGGAGGGGTTGGAACATAAGGTGGATAAGGAATTTTTGG  
AGGAGTTTGAGGAGGTGTTGGAACATAAGGTGCTTTTGGAGGAGTAATTGGAACATAGGG  
AGTGTTTGGAGGTGTTGGAGGATAATAAGGAGGTGGCTCTCTCACAGCCAACACCACAAT  
AATCAATTTCTGACCCTTTTCACAATTACCATCTTCCCCTAATGAAGTAAAATGGACC  
CGATCGATCAAACCTGAACTCCGATTCACTATCCTCAAACCTCTTGATCGGGTTCTTCTT  
GTTACATTTCTCATAATCATCCTTGTTCAACCACCAACACAGTATCCGAGCCCTTCTTGTA  
CTTA

>**Gmax\_MSTRG.104177.7** GeneID=Gmax\_MSTRG.104177;Strand=+;Pos=Chr20:36605721-  
36605828,36608599-36609160,

CGCCATTTCTTATTTTACTGCATTAGCTTAGTTACCTTAGTATAGCAATCCTAACAGTT  
CTTGCTCAAATTTTTCTTTTCAGGAATATTCGATGGATTTTGACATTAGGTCTCAAAG  
CTTAAGAAGAAAGCAGTGAGATGGGAAAGGAAGAGACTTACAATAAGACTGAAGCCAGAG  
ACAGCACAGAGAGAGATGGCAATGGCTGTGCTAGAGAGAGCAAGCTTACCCAAGTGACCA  
ACCATCATCATTGAAATAATCTGTAGAAAATACTGTGACAAAGTCACAGTAATCATAGGA  
GCTGCTAGATAACCCACTCTTTTCATTTCTGAGAAAAGACAGTCCATGTTATGGCTGAA  
GCTGAAGGATTCTCCGGCTCTGAGTCCTTATCTAAGAGACTATTTTCCATATCCTCTCCA  
AAGGGTCACAGAATCACTGCACCTTGTCGAACTGGTAGAAATAATGGCAGGGCTTTGGT  
GTTTTGTATGCTAAAGGTTTAAATATTTACAAGTGGCAGCAGCAGTAGTTCTTCCAAGG  
TTTAAATATTTGTTTCAATAATGACTGTCTCAGAGTCTCTCATGGGCTTCCCCCTCTTAT  
GTAGACGGAACAATATTTCAAGTAAATTTTAAAATTTAAAATCATTCCATCTAATCTAAT  
TTAATCTAAA

>**Gmax\_MSTRG.17616.1** GeneID=Gmax\_MSTRG.17616;Strand=-;Pos=Chr04:8838100-8839080,

GCAAGCATGACCCAGAAAGCCAAAGAAAGTTTGAAGAATTCCCAAAGGCCAACAAAAGCT  
TCAACAGAAAAACCAGTCCACGAGCGAGGGCAACCACCAAAGAGTGTATACCCGAGCATT  
CCCAAAACAGAGAGCCACCACGAGAAACCAATGGAAAGAGCAGTGCCAACAATCCCAATT  
CTCATCCTATAAACAAAAACCCAACTCACTAACACGTGAACCGCAAGAGCCACCCCTGAA  
ACCCAAGCAATGATGCCGGTCTTCAACTGGCACTGCAGGAACCGCTGCAAAGTGAAGTGG  
AACGGGAAGCTCAGGTGCAATGGGATCAACCAAACCGCCACCAGCCCCGCTGCTCCGCC  
ACCGCGACGGGCTGCCCTATTAGCTTCAACACCGGCGTCGCAAAAATGAACACCGGCAAC

AACAGAATGGAAGACAGGAACAGAACAACCCACGAGCGTTGCAAATAAACGCCCAATATG  
CGCTGTTGTCCGGCGCCGTACGCCTGCCCCGATAGTGTCTCAAGCGCACTCGCCATACCC  
AACTAAAAAAGGAATAAGTTCGTTAACAAAAATTAATACTAACGACTAACACAATAA  
TGCGGTGAATGAAAAGTGGGAAATAGTGAATGAAAAGTGGTAAGTGGAAAGTGTACCAA  
GAAACCGAAGGTGATGGAGATGAGGACGGTGCAGGCGATGGAAATGGCGGCGAGGTGAG  
ATCGCCGAGGTGGCCGGCTAAGGACTGGGTGACGACGGTGTGGAGAACATGGCGAGGCG  
GGTGAAGATGGAGGGGGCAGCGATGTGCCATAGCTTCTTGATTGGAACATGATCGTTG  
GAAGAGAGAGTGATTGTTGGATCCGTGTGGTGTGGTGGCAGCTTTGACTTTATCAGAGG  
ATGCTCATGCTCTCCTTCATTCAGAATATTTCCCATGTGTTTTGCTTCGCTTCGAGGT  
GTCGATTACTGGACAACAATA

>**Gmax\_MSTRG.70937.1** GeneID=Gmax\_MSTRG.70937;Strand=-;Pos=Chr13:37710136-37710668,  
GGGTGGGGATGTTGGCATATCTTCATGGTATACATATTTTTCTGCAAATATCTTTTC  
TCGTAGAAAAAATAACATTAGCACTCTTCATGACCTACTTTGTTAACATTTGCAACAAT  
TCTTTTATGAGGATACATGGTGTAAATATGTTTTTAATTAGGTAATTGGAGTGCCATCAGT  
ATATATAATACATAGAGAATGTCATTGCATTGTAGGTATTTCTAACAAAATCAAGGAGTT  
CATGGAGGAATGAAAAAGAGGGAATGGAAGGATACTGAGGAAAATTTGACCAACCAATTT  
TCATTCTCTTGCAAGCAATTGAATCTAAAAATAGTAGACTCCGTGGACTATTTTCATTGA  
CCCATACTAGCAAGCAATCAGTTAAGCAGATGGTGGTTGGATTTTCATCTCTGTCCAAGGA  
GACATTCAGTTTAGTCCATTTGGCACGCCATGCCAAAAATGAGAGAGTCCCAGTTTGACA  
AGCCAACCCACAAATCAGGCCAATCCATAAACCTGCACATTAACAAATCC

>**Gmax\_MSTRG.17415.1** GeneID=Gmax\_MSTRG.17415;Strand=-;Pos=Chr04:7719249-7719695,  
CAGGCGAGTGAGACTATCATGAAATGCGGGCTTTGGCGGGGCGGTTGGCGCCTAACTCG  
TTCCCCACTCTGGTGGAGACGGCGAGGCTGAGAGACGAAGGGAAGACGTAGACCAACGCA  
GTTGTCTGAATAAGGATTCCCATGGAGGCAATGGTGGATTTTGGGTTGAGAAGGAGTCCG  
CAGAGAATGATCATGAGTTCGTACCACCACCACTCGAGACAGACGGAGACGCAGTTAGGA  
ACAGCTAGTGCGAGAAGGGAAGACCATCCCCTGAGGCAGTCGGTGCTAGGGGGAACCCAC  
GAGTCCTTGTAGACACGAGAGAAGTAAACAAAGGAAGAAAGGAAGATGAAGAGGTTTAGG  
TTGGTCCACACCATGGCTATTGCAACGCCAGACACTCCCATTTTAAAGTGGACAATAAT  
AGGAAGTTGAGAGGGACGTGGAGGAGG

>**Gmax\_MSTRG.548.1** GeneID=Gmax\_MSTRG.548;Strand=+;Pos=Chr01:2753205-2753825,  
CACGTACGTGGATGTGTTTTGCAAGCACTCACCAGAGCATAACAGCAGAAGCAAGAGAGA  
GGCGAAAGAACCCCCAAAGACTCCGAAACGCTTCCCACGAGAACCCGTTCCACGCCGGCC  
AGCACCACCCTCCGAAAACATAAACCAACTGGGCCACCACCACGAACCACCACGATCCGT  
TGAGCACGACGGCGGCGCCACGAGCCCCACTCCAGCTTCACCATGAGCAGCCAGCTCA  
GCACCGGGTGCAGCACCATGGCCATCCCGGCTATCGCCGCGATCACCATCACCTTGCTCT  
GCGCCTGCAGGAACCTTCGCCACCGGAAAAATTCAGCGCGTAAGCGAACAGCTGCGGAATCA  
TCCAAATGGCGAAGGTCCCCGAGCCTCCGAAATTCGGTGTCTTGCCCTATCAACTTCA  
GAACTTGTCCCGCGAAGATGTACAAAGGGCACAGTACACAGGCCGTGCTGAGGAGTAACA  
CCCATGATCGTTGCATGTACACTCCCAGCATGTCCAGCTTCCCTGCCCCACCGCTTGTC  
CGCACAGCGTTTCCAACGCGCTTCCCATCCCTAGCTGCTCGGAATCACATTTTTTTTTAT  
CCAAAATAAACATCAAAATAT

>**Gmax\_MSTRG.89038.1** GeneID=Gmax\_MSTRG.89038;Strand=-;Pos=Chr17:11025148-11027394,  
TTGGTTAGTGGTCTTAATTTCAATAATAATTACTTCGTAATATAAATTTATCTATGCCT  
TGCAAATGATGGAAGGGACAACCCATATACTTCTTGCCATTTGGTTTGAAGCAGAATCCC  
CTGATTACAAGCTTTACTGTTTACTTCTTCTCTTTTCCGTTATCTTTCTCAGTAAACGAA  
CGGGGCTTTGATATTGAGATTTAAGAAACACAAGAGCTGCAGTACTCCTAAATTTCTGAA  
TCTCTGATGATGGGTAATTGATGCTTTGCTTTTAGATGTATGAATAGAATAGTTTTGCCT  
TGATTGCATTATGATCATTTGACACAATTATAACATTAGTACGTAGACCAACGTCTTGTT  
CTACCTATTGATTTAAATGCATTAATCTTCTAATTTTCAAATCTGAAGTTCCACTGCAT  
CCGTTACTACAATTACAAGTAGCAATGATATGATTTCAGAAAACACCCGAGATCACAAATA  
CTAGTGAGATTGAGAAGGGACTTAGCATATTGTACATGTCTAATCTTCTCACCCCAAGT  
GTTGTTATATATGAATTTGGGGTGATAGAGCCATAGAGGTTTCTTTCAACGTACAAGTTC  
ATTTACCTGATTTCTTGGAACCTGTTCTGTACCTGTGCGGGAATACATACTAACATTTG  
TGCCTTGGTAGCTTCTTGCAACCAATTTATTCTCACAATAAATGTTAACAACAAAATCAA  
GCATGCAACAACACCAATCAAGAATCCTATAATGAGTCCAGCAAGTCCTAAACGAAGCTT  
GAAGGCAAAAACCAACCCAATGGTAAGGCCAAGAAGTAGAATCCACCAATATTGGCATA  
CATTCTAGCCATGGTCTTGCAAGTCCCTCGCACTATGCCTCCACAAACCGTCACAGGAAA  
ATTAAACACTTCCACCAGAGCCATCAAAAACATTGTCTTCTTCACACCCTTTACAACCCC

TTTATCATGGCTAAACAAATTCCCCCAAACCCCTCTAGAAGCCACCATCATGGAACCACC  
GATACAACCCGATATAACACCCACTGCCAAAGACACACGTGCTGATTATAAGCTTGACC  
AGCACTATTAGCACCAAGCTCATTGGACACACGAGTGGAACACACGTGGCTAGAGAAAG  
CATCACTGAGTAAAGCAAATAGTCAAAGTTCAACACAATGGCCAGAACCCCCAGGGCTTG  
TTTTGCGTTTGCCAAGTGGCCAGTGAGCAAACTAGAATCTCGTAACACCACCACTCAAG  
GCACGTGTTGAGGCAGCATGACCCACTAAGCTTCATTAGCCTAATCCAATCCATCACATT  
CTGATCCCACCACCCTCCTTCCTTCCACAACATGCCCTCATTTCTTCTCTCAAGAACCAC  
AACATAAACCGCCAGCATAACCATAACCATGAGATCGGTTATCCAAACCGCAATCGAAAC  
TCCTCGGAGTCCCATGGTTTTGGAGAGTACTATGTTAACGGGTATGTGAAAGGCTAGTGC  
CACAGCAGAACTAAACATGGTGGAAGAGTCATGCACTGAGAGCTGAGGTAGGTTTTTAA  
GGGACAAAGGAGTGAAGTGACCAACAAGTCAGGTATGAGATAGGAAACATAGGTTTTGGC  
CACGGTTGAGATCTCTTGTTGTTGGCCAAAACAAATCAAAATCTTGTCACGTTCAACCA  
CATGAAAGATATGGGGAGTGATGCCAAAAGCAACAAGAGGGTTGTCATGAGAAGGGTCTT  
GTGGAGGAGCCTCACGTTCTTGGCTCCATGCGCTTGCCACAGATTGGTTCCATGGCGCC  
GCTTAGACCGTTCAAGACGGAGAAGCCGGTGATATTAGCAAACTGAACCCGAGAGCGCC  
ACCGGCTAAGTTCAGCTCCCCAAGGTGGCCAAGAAAAGCTGTTGTTATGGCTGTCTTGGC  
AAACCAAGCCAAGTTCATGGCCACAAGAGGAAGGGCTATCCCTCGTTGAACTCTTAGCTC  
TTCTAGTACCATCTTTATGAAATTTGCATTGAAAGGGCATTTTTTAGTGTGTGATGAAGG  
AGATGAGGGCCGATGGTTAGCCTTATCGTTTGTGCTTAGGTTCTCTACTTGTTTAGATGT  
TGCTGACATTTTTGCTGAGATAATGTTATGGTATGATTGTTGTGTTGTGAAGTTTCACTA  
GCGTGTTTCTTTGTTTTATATAAGATTGGTTAAGCAACCAATCTTATATAAAACAAAAG  
AAACACCCTATTGGAAGTTGTTTCTCA

>**Gmax\_MSTRG.10879.1** GeneID=Gmax\_MSTRG.10879;Strand=+;Pos=Chr03:549584-549901,  
AGAACACCATTGGCGAACCTAATGAGAACGGTGAAAACGAGAGCATAAGCGGCCAATTCC  
TTAGAACCAATATGGCCAACAAAAGCTTGGCTTATAACACTGATTCCAAAGGTGGAAAAC  
CTTGTTGAATATGGCTGGTGCCGCCACTATCCACATAACCTTGCTCTCATTCCACACCCTC  
TTGGCCAATGATAACTCTTCTTCTTCTTCTTCTTCTTCTTCTTCTTCTTCTTCTCAACAGC  
TTCTGCTTCAGATCCCCCTCCATTTTATTTTTGTTTTGGGTTTGGGATTGGTCAAAGA  
GAGAAAGAGAGAATGGCG

>**Gmax\_MSTRG.70933.1** GeneID=Gmax\_MSTRG.70933;Strand=-;Pos=Chr13:37697679-37699947,

TTGAGAGTCCCACTTCTCACGCGAGAAAATAATCTATCATCAATCATATGGTTCTCCAT  
TGTCATTACACGTAGTTTCCTAGTTTTTTTATAGTATTCTTTTCACGGTGGGATACATT  
ACTCCCCATCTATTCTTGATGTGTTCCCGTGAGACTGTTACATTATATGCCAAGATTTAC  
TCTCTGCAACTACCAAACTCCCAAATAAAATATAAAAAAAGTGTGAGCACTTTCTCA  
AAATGAATATAAGCAAGAAACGCTTCACCAAAATCATGTTCAAGTGTTCACCCTATCTGAT  
AAACTTCTGCATAATAGAATGCAAACCTTTTTCTTTTTTTTTTACCATAAGTCCAATTCC  
ATTCAGTTAAACAACAAGAGGCCGTTCTTTATCATTGTCCCTAGAGAGATCCAATTTAGT  
CCATTTGGCACGCCTTATGAAAAGGAAGAGAGTCCCACTTTGACAAAGTAACCCACAAAT  
CAGACCAATCCATAAACCTTATATCATAAAGCAAATTCAACACAATCATATTAATAAAAC  
AACTGAATGCAAAAAGATTGATATCAGAACAACATAACCAGACTATGCAATAAATATTT  
TATTTACCTTGACTGCAAATTGGTCTTAAATCCTAGGAAACATGATATTGGCAAACCAA  
TAAGATAAAATGTAGCAAGGTTAATGTAAGCAGCCAAGTGCTGCCAGCCACATCCTCTGG  
ACACCCCTGCAGTATTAAACACAATTCCTCCTTGAGAATTTTTAAGTTAAAGTTATAGT  
TTCAAAATTTAAAGAAATGACAAATGAGGAATTCAAACCTGACAAGACACCTTGGATGG  
CATCAAGTAATATAGAAATGGCAAGCAAGGGTGTCACTGAAGCAAACCTCTTTTAAATTG  
TAGAACTGTCGCTGAAAACTGAATCCAGATATTGTGACCAAATCCAAGTGCCAAAACAA  
AACATAATCCAAGGAGGAGAGAGAGCTTCAGTGTGACACTCATCGCATGTTTAGCTCGTT  
CCGGGTTGCCTGCTCCCAATTCATTGGATACCCTTGTGCTGTTAAAGTTAAATTTCAACT  
TTTCAACACATGTACTAGAATGTTGATTGAGAAGATATGCAACAATGCAAGCAAAGGAGA  
ATGTGTTCAATCAACTAACCTTGCAGCTGCACTGAGACCATAAGTGATCATGTAGGCAAT  
GAATTCTGTGTTTATACTGCAGATTTTTTTGAAGATTAAACAATAGTAAATTATATGAAAC  
TTTTTTTTTTCATTTTAATTAACAATATTAATAATATGAATCTGTTTTCGAACATATAA  
AGCTATTAGAATTTAGAACCTTACCATATTGCAATCAACGAAGTGGTTATCTGTGAGTCG  
GGCATTAGTCCAGCTAAGAAAACCAAACTTCAAAAGCCCAATACTCCAAACTGCATAA  
CATAAACATCAGGTAATAAGATGATATATGAATCTGGACGAACCATGGTTTTTACCCTTG  
TATTGAGGTGTTTTTCACTTTAAACAAATCGTGTCTCTGATTTTTCTTAATTTCTATTT  
GCGCTCTATAATTTATTGGTGCTCCTAGGTTTTTGCAAATTTGGGAGAATTTATTTCCAC  
TGTCTATTACTCTATTATTGAGTTTGTTATTGTGTTGGCTGTTTTTCCAATCAAGATGA  
ACAATCAAAAGGGCTAGCTAAGTGAAAGGTTATTAGTAATTCATACCATACCATTGCAGC  
AGAGGGCAGAGCTAGTCTCATGTTTGTAATAACGTAACGAAATGAATGCGTTGAAAATCC

TTTCCATGTCTGCTTGAACCTCTTAGCATACATTACATACAAGGCCAATAATAGCAATGA  
TATCCATAGTGAAATAGAAGCAGCAACTGGTGACCTGTAAACTCAGACCTGACCACTG  
AACCAAGCCATATGCAACACCAATATGAACCAGCATTGGAAGAGCAGAGAGTACAACCA  
TGGAATTACTACAGATTGTGTCTGGAGAAACCTCAAGATGTTTTGCAAGAAGCTATAAGC  
AAACACTCCCGGGATAAGAACTTCATATAAAGTGCAGCTGTTCTTGCAATGTCGGGAGA  
TTGATGAAGCAACACTAGGATGGGTTCTGTATAGAACCAAATAATGGATATAATGATTGA  
AAAAATAAGAGATATGATGCAAGAGGCTGTAGGTAAATTCCCAGCATTTGGTATTCCTT  
TGCACCAAATCCTTGTCCGCAGAGTGTTCCAGTGCCCCACTCAAACCA

>**Gmax\_MSTRG.46909.1** GeneID=Gmax\_MSTRG.46909;Strand=-;Pos=Chr09:33369122-33369354,

AGGGCACTGATGACACCTTGGTAAACAGAGATAGAAGAGAGTTCAATGTCTCCAATATGG  
CCAGCATAGATGGAAGTTGAGGAGATTGTGAGAACTGAAACAGTGCAGACAGTGCCATA  
GGGAATGCTATTCTCCATATCTTCACTGTTTCTGTCCACAAAACAACTTAACATCCTTC  
AAGCTTTTCACCGGCAAGTAGTCAGATTCTGAAGTGAACTTTTCGGTCACTAA

>**Gmax\_MSTRG.58090.1** GeneID=Gmax\_MSTRG.58090;Strand=-;Pos=Chr11:8552497-8553372,8553746-8553935,

GAAAGTTAATGTAAACATCCTAGAAGAGTAAGTATGGGAGAAGAAATAGTAATTTTATT  
ATTATATGCTAGCTTTCCATTTGTATAGAAGATGAAACGAACATACCAGCAACGTTCCC  
TCAAGGCTGACAGTAGGGGGTGTACAGCCAGGGCTATAAAGTATGGAATCAGCACCTTA  
TGCATCTGCGCCTCCTGGATGACCATCCGATCAGGTGTAAAAATATTGGGAAATAACCA  
GGAACCGATGTTCCAATAATCCCTAACAACAATCCAAGTATAGCTCCAATTATCACGAGA  
GACCTTAGAAGCATTCGGGCCTGTTATGAAAACCTGAAAAAGGAGAACTGAGAAATGAGA  
ATTGAATATATTTCCATAAAATAACATTGGTCAGAAAAGATAAATGGATTACCATCTTAT  
AAAACACTACTTCCTAACTAAAAATAATTTATCCTCTTACATAACAAAAACGTAACTAG  
GCACAAGAGAGATCAGAAACCACAGATATGAGGATTGGACATCAGAGTATGCTTTGTAAT  
GAGAAACACTAACCTTTGACAACTCCGATTTACTCCATATATCAATTCAGGCATAAATG  
ATTGAGAGGTTTGGGAGAGAGGTTACCCCATACGGTACACATTAAATAGGTTTGGACCA  
TGACCTGAAGAGGGAATGAAGTTATCACTGGCCTTGAGTTTTTGTTTTTAAAAAAGCTC  
AGATGGCAGGCAAAGGAAGGAATAGTCACAAAACAGGAAACAAAAAAACACTAACTTGA  
TGAGCAGCCATTGTATGTGTACCCATTGATGTAGCAAAATATATAAGTAGTGCGTAAAAA

GCCACCTAAACATCAGAACTTCAGATTATATTTAAAAGGTTATACCACTCTAGACAAAGCC  
ACAGATCTAGTATAATACTTGAGACAACCTTTGACATCAATGTTATAAAAAACAGGAGCAG  
CAAGCCCAAATATCGTCAGAAGTTCCTTCCCTGAAGGAATGGAGAAGGCAAGTGCATTAT  
ATCCCTTCATATTTAGATTTTGAATCATCATGTAAGAAGCAACAAC

>**Gmax\_MSTRG.5527.1** GeneID=Gmax\_MSTRG.5527;Strand=-;Pos=Chr02:3607713-  
3607922,3609643-3609753,

TATTTATCCCTTTTACCTTTATTTGGGAATAAGGATCATCTTTACCAATATAGGAGAAAT  
CATTATCAAAATCTTTATCAAGATAAGGGAAATACTTATTAAGTTATAAAATCAGGGTAA  
TGATCCACCAACCCGCTAGTTCTTTTTATGAGGCACAAACGGGAGAATTTATCCTGGAAG  
CGGAAGAGCTACTGAAAATGAGTGAACTATCACAAGGGTTTATGTACAAAGAACGGGCA  
AACCTTTATGGGTTATATCCGAAGACATGGAAATGGATGTTTTTATGTCAGCAGCAGAAG  
CCCAATCTCACGGAATTGTAG

>**Gmax\_MSTRG.34860.1** GeneID=Gmax\_MSTRG.34860;Strand=-;Pos=Chr07:19193297-19193579,

GATTATCTAGCCTGGCAAAGTACAGAGTCGGAAGAAATTATAACATAAAGTAATGTAAAA  
TCACTTATATGAGAAGATGTATGAATCAATAATTAGCCAAGTATGACATACAGCAGGTAT  
ACCCATGATATTCATAAGAATGCCAGAGCCAAGCGTAAGCACACAGTTTCAGCAATTCC  
AAGAGTTGCAGCAAGTGCTAAAGAAGTTGATACTGAAGGAAGGAGCTTCTTGCTTTGGTC  
CTTTCCTGAGAAATCATGACCCACATGAGATAAAAATTATTTG

>**Gmax\_MSTRG.17697.1** GeneID=Gmax\_MSTRG.17697;Strand=-;Pos=Chr04:9417435-9417745,

GCTATGTGAAAACCTTAATTGACTGAATTAGAACTTGAAAGACTAAAATTATACATTTGAG  
ATATCTAAAAGATCCATTGGAGGACAATATTTTATTGTCCTTTTAAATGATAAATACCCG  
TTGTTCCCAATTTATGCAACTGGTTATGGTAGAAAGTAGAACACATTCAACAAAAGAACC  
AACTTGACACCAATCCAAAGTCCTTTTCTCTTAGTTTTGCCAAAATGACAATAAGAC  
TGCCATTGGAATCCCGCATAGGTAAATGCTCCTATATTGACATAAACCCCTATGTGTTG  
CCATCAACAAC

>**Gmax\_MSTRG.46372.1** GeneID=Gmax\_MSTRG.46372;Strand=-;Pos=Chr09:18851935-18852149,

CGGGAGGCCTATTCTGATTAAGTGCACAACAAGAACAACCTTTGGAGAAGATTCCAGCTCC

AAAGTACAATCCAAATCCAACTGCAAAAGACAATCCAACTCCTAAAACAAAACATCATCTG  
GAGAGTTCGTGTTGCTGCAACAAGCACCTTTTCATAGTCTTCTCAGCAAAGGAACAAGC  
TAGAATTGCCTGAAAAGGAGAAAGTAATTAGTAAT

>**Gmax\_MSTRG.104177.4** GeneID=Gmax\_MSTRG.104177;Strand=+;Pos=Chr20:36605682-  
36605828,36606807-36609160,

AAATACCTTGGATGAATGAGAAAGAAGCAGAACAAATTATCGCCATTTCTTATTTTACTG  
CATTAGCTTAGTTACCTTAGTATAGCAATCCTAACAGTTCTTGCCTCAAATTTTTCTTT  
CAGGAATATTCGATGGATTTTGCACATAGCCATAAAGACTTGGAAGTGGAGGCAAACCTG  
TTTTTCCCAGTTTGTACAACCTTGTGATGAGAGATAGCATAATTGTTTGGCAGAAGGCACC  
AGTCAGTATTCCAATCCAAAGGCCTTTTCTCTTAATTGTAGCCAGAAACCCAATATGGC  
AGCCATTGGAATCCCACAACATAATAAGCTCAAAGGTTTACATATGCTCCTATGTGCTG  
CCACCCACATCCTCTAGCAATACCTATAATGAAGGCATAACTCAGATTCCATTGCTTAAG  
AAGAGTAATGTGCATTGAAAAATAGTTCAAACAAGAACTAACCTGAAAGGGTACCGTGTA  
ACGTGTCTACTATAACAGATATACTTAAAAGAGGAACCATATCTGTGACATAATCCACCA  
CATCCTGCTCATTGCTAAATACATAACCTAAACCTGCCTGCTAGCAAAAATGATTGAGC  
TCACCAGAATGGCCTCAGAACTGCTAGAGTCATGGCAGCAGAAACAGATACTCGTGCTG  
ATTGTGGACTTCCAGCTCCTAATGCATTTGAACTCTAGTGCTGAACAACCCGCCCAAAA  
GAGAAACCAATCAGAAAGAGGAAAAAATTCATTTACTATAATATCATTCTACATGAATAC  
GAATATGCACAAATTGATGAGCTTAGGACTTGTGTGAATCAAAACCTTGCTGCTGAGCCA  
ATTGCTTCTGGGATTGTGTAGATAGTTGTGATGATGGATAAACTGGTCAGAACATAGTTA  
ACAATAACAACAAATTAGCAACACTTGCATGAATGGAAATCAAAATTTGGCTGAGTAACA  
ATTTCAACACAGATTTTAAAACACAAAGCCATTCATGTCTGAAGGACTAGGATAAGTTGT  
ACATACCATATGGATAAGACTGAAGTTTCAAGCTCTGGATTTGGTAGAAGACCAGAAAGC  
AAGGTTAGCAGCTCAAATGACCACCACTCAAGGCTGCAACGATCAAATAAGTAAGAAACA  
TACCATGGTTGAAAATTAATGGGAAATAAAAAACACAACACAAAAGATAAAATATAAGAG  
GAAGAACTCACCAAACCATTCAGCTGAAGGAATAGCATAGGTGAAGAATTCACCAATC  
CCATGGAATAGTTCCATTGAAATTGGGACTCGAGTCCTTTCACATTCAGTAGAGAATTC  
ATATATAAGCCAAGTAAAATCACATTCAGCCAGTATGAAGTACCAATTGAAAATGCTGCT  
CCCAAGTTACCAAATCCAGATTTAAAGACCATTAACCAACTGAAAGCCACATGGAAGCAA  
AGAGTAATGGAGGAACTTATGACAAGGGGACTGATCAAACCTTGCATCAAAAAGAATCGA



ATCAAGGCCTGAAGTGTTGCATAAGCAAAGAGAGCAGGGATCATGCACAAAGCAAATTTT  
CCAGCTTCTTGTGAAATCGAAGGGTCTTGGCCAAGAAATATGAGTATCTTCTCCAAGTAG  
ACCCAGAAAAGAGTCAGAGGAAGACAAGCTAAAGTAAGAGAGACAATAGCAGTGTATATT  
TGAACACCAAATTTTCGATATTGCTGTGCTCCATATGCTTGCCACATTGAGTTTCCAGT  
GCACATGACATTCCAACTGTTTGACATGTACAAAAAAGACAAAGTGCAATTAATTCTTA  
TAATTTTTTTAGAGACCATAGGTATCTTCACATAAGAGAATCCTACTCGAACTTAAGCCA  
TTTTGTGTTTTAATTCATCTTCATCTCTTTTGTTTTTAATAATTTTCCATCCTTGATAA  
TTTGGGTTCATGCAGTAGTAGGTCTCAAAGCTTAAGAAGAAAGCAGTGAGATGGGAAAG  
GAAGAGACTTACAATAAGACTGAAGCCAGAGACAGCACAGAGAGAGATGGCAATGGCTGT  
GCTAGAGAGAGCAAGCTTACCCAAGTGACCAACCATCATCATTGAAATAATCTGTAGAAA  
ATACTGTGACAAAGTCACAGTAATCATAGGAGCTGCTAGATAACCCACTCTTTTCATTTT  
CTGAGAAAAGACAGTCCATGTTATGGCTGAAGCTGAAGGATTCTCCGGCTCTGAGTCCTT  
ATCTAAGAGACTATTTTCCATATCCTCTCCAAAGGGTCACAGAATCACTGCACCTGTGCG  
AAACTGGTAGAAATAATGGCAGGGCTTTGGTGTGTTTGTATGCTAAAAGGTTTAAATATTT  
ACAAGTGGCAGCAGCAGTAGTTCTTCCAAGGTTTAAATATTTGTTTCAATAATGACTGTC  
TCAGAGTCTCTCATGGGCTTCCCCCTTATGTAGACGGAACAATATTTCAAGTAAATTT  
TAAAATTTAAATCATTCCATCTAATCTAATTTAATCTAAA

>**Gmax\_MSTRG.85884.1** GenelD=Gmax\_MSTRG.85884;Strand=+;Pos=Chr16:35991281-35993500,

ACATTCAATGCCCTGCAAGATGTAATTGAATTTTACTGGAAATAGCAGAAGTCCTTAGAG  
GAGAGGCATATACCCAGTGAATTTTTCTTAAGGACAAAACCTAGGTGCAGCAGTAACTT  
ACGTGCTTTTAGTATTATTTTTTAAAATCAAAATTGAAGTTTCACATGGGTAACCTATAC  
TATTTTTTTTCTATGTAACTTGTATTATGCAAATTACCGAGATAAACTCTAATTTTA  
ATTTGAAAATAACAAAAAACAACCTTAAGGAACTGCATCTAATGTTATCTAAAAAT  
CATAAAATAAAAAATGCTATCCTCTGTCTCTACCCTACTGCCCTATACAGTTAAAGACAAA  
TTTACGAAACATCTTATCCTCTCTCTCAGTTTTTGTGTTTTCTTTAAGGAAGTTGAT  
GAATTTTAAACCAATCACTGTTTCAATTTTCTGAGTCAGCGAGCAGCAAAGAATCTTCA  
TTGCTTTCATGTTTGAGTGGCTTCTCTGGATCAACCTCACGGCTCTGATCAACACCAGAA  
GCTGCTCCTCCATTCTGTGAGTTTCTTGGCTCTTTGAGCCTCGAATTTCCCAATCAGTT  
CTACAAAGAACCACCAACATGGTCACTGCGCAAGACCCTTGAGCTGCAAGAAGGCCAAGC  
CAGAGCCCTTGAAAGTCATAGCCAGTGAAAAAGGCCAGCCAAATGGACACAGGCATTCCC

ACAAGATAGAAGCATCCCAAGTTGATGTTAGCACCAACTTTAGGCCTTGCTGTGCCTCTC  
AGCACCCACACCCTGTTGTTTGAGGGCAATTCCCAAGCTCACAAAGACCAATTATAGGT  
AACACCATAGATGTCAAAGTTATAATATCCTTGTCTTTGTGAACATGCTAGCCCATGTG  
TTCCTAACCATGAGAGCAAAAACCAATGCCAAGACACCTGACATGAAGCTGCAAGACAAC  
CCCACAATGGCAGAAAGCCTTGCCTTTGAGGGCTTTTGTGCACCAAGCTTGTGCCAACT  
CTTGTTGACACACTGAAGCTCAATGAAGAAGGGAAAATGTAAAGCAAAGAAGTGGTTTGA  
ATGAGAATCCCCATTGAAGCCACAGTAGCCTTGGGGTTCACCAACAAACCACACAACAAA  
ATCATGATCTCATACCACCACCACTCCAAGCACACCGAAACACAGCTTGAATGGCCAAA  
TTGAGAAGAGACTTCCACTGTGTGAAGCACTCAAAGGAGAAACCACCCCATGTTTTCTTG  
TGAGTGCCAGAGAAGACTATGTAAAGAATCAAGGAAGCCACAAGGTTGAAGTTTGTCAAC  
ACCCACCAAGAGCAACCCCTTGATTCCAAGCTTGAGGTGAGCCACAAGGAAATAGTTG  
ATGGGTATGTGAAGGAGAATAGAAAACTTGCACAAAGAGTGAGAGGGAGAGTAATGGAT  
TGGGTCTGAGGTAAATTCTCAAAGGGTGTAGGAAGGATTGTGCTATGAGGTCAGGAATG  
GAGTAAACAAGATATGATTGGGCTTGTGTGGCTATGGCCACATCCTGGCCACAAAGGAGG  
AGAATTTGCTTCATGTAGAGCCAAAGGAGTGATATGGGGAGGGAAGTGAATAGAAGAAGG  
AGAATGGTTCTTTGTAAGCAGAGGCCAAGGAGGGTGAATCTTTTGGCACCAAAGGCTTGG  
CCACAAATTGGTTCCATTCCACAGCTAGGCCTGAGAGAATTGAATAGCCAGTGATGTTT  
GCAAAGCCAATAGCTAGAGAGCCACCAGCTAAAGCTAGCTCACCAAGATGGCCAAGGAAG  
AGCATGGAGATCATGGAGCGGCAGTAGAGGAGGAGGCCAGTGAGGATCATTGGGATGACA  
ATTTTGGATATTGAAAACACTTCTTTGATGGCTTCAGGGACATGATGGGGTTTTGGTGCT  
GTTGTTGTTTTTGTGCTGTTGTTGATGGTGGTGGTGTGTTTGTGTTTTGTTGTTGTGTTG  
TTATGTTGATGAGGTGGTGGTGGTGGTGTGGTGGTGTGTTTGGGGTTTGGAGATCAAAGGG  
TTAGTGATTGAAATTGGGCAATCAGGAGGCGAAGTGCTGCAGCATTGGCAATTGCAAGTG  
ACGTCAAGAGTTGGATGACACATGGTGTGTTGTAGCTACTTTGTGTCCGTGTGGAGGGGA  
AAAAAATGGTATTGTTTTGAATAGACTTGAAACAGAGAGAGAGAGAGAGAGAGAAAGATG

>**Gmax\_MSTRG.4163.1** GeneID=Gmax\_MSTRG.4163;Strand=-;Pos=Chr01:54702238-54704775,

TTTTTATTTCTTCTTTGTATGAATGCATGCGTTTATGCTCTGCCTCTTCTCCGAATGTA  
CAATTAATAATTAGGACAATCTAGAAAGAATCAATTTTATGTTATAAAATCTAGCTTGAAT  
GCAAAAATATAAAAGAATCAACGTGACGTCACTGCAATGATGATCGATCAAATAATGAA  
TCAGAAATGAGAGCATTCTTTGTGGCGCCCGAACTGAACAAGCATTCTGATCTTGTTC

TCCTCCTCCTCACTAGAAATCAGACGATGATGTGAGTTCCTTGGCTCTTTGAACTTGACCC  
TCCCAATTGGTTCGAGCCAACACAATTAGCATGGTGAACATACAAGAGGCTTGAGCTGCC  
AATAAACCAAGCCACAAGCCTTTGAAATCAAAGCCGGCAAAGAACTCAACCTCACCGCA  
ACGGGCATTCCCACTAGATAGAAGCAACCCAAATTTATATTCGCTCCCAACTTGGGCCTT  
GCGGTTCCCCTCAAAACGCCGCAAACCGTTGTTTGC GGACAATTTCCAAGTTCACATAGT  
CCAATGATGGGCAACACCATCGATGTCAAAGCAATGATCTCCGCGTCACTTGTGAACATC  
GAAGCCCACACGTGCCTCACCGAACTGCGAAAAACAAAGCCGAGAAACCCAAACCGTAA  
CTGAAACATAACCCACGAGGGCTGCAAGTTTTGCCTTTTTGGGATTCTCCGCACCCAGT  
TCATTTCCAACACGTGTGGAAACGGCAAAGCTTAGGGAAGATGGGAAAATGTATATCAGA  
GCAGTGGTTTGAATCAGAACACCCATTGATGCAACCGTTGCTTGGGGATTAATCAATAAC  
CCGCATAGTAAAATCATGATTTTCGTACCACCACCACTCCAGGCAAACGGAAATGCAACTT  
GGAATTGCAAGATTCAAAGCGATTTCCAACCGCTGAAGACGCCCTTCAACGAAACACCG  
GGCCATGTTTTCTTGTATACGCCGGAGACCCAGATGTAGAGAATCAACGAAAAGACGAGG  
TTGAAATTCGTCCAAACAGCGCCTAAGGCAATGCCTTTGATTCCAAGCTTAAGCACAGAG  
ACAAGGAAGTAGTTGATGGGGACGTGAAGGAGAATAGACAGAGAGGCAGTGTATGTGAGA  
GGCAGGGTTATAGATTGACTTCTTAAGTAGATTCTCAAAGGGTGTAGCAATGATTGTGCT  
ACAAGATCGGGAATTGAAAATAGTATGAAAGATTGAGCTTCGGTGGCGATGTCTTCTTGT  
TGGCCACACAGGACCAATATTTTCTTCATGTTGAACCACAAGAATGATATAAAAAACACAA  
GTTAGAAGAAGCAAGACCATTGTCCTCTGCATCGCGAGGCCCAAAGTTTGAACCTTTTG  
GCCCCGAAAGCCTGGCCGCAAATGGGCTCCATGCCCATGGCGAGGCCCGAGAGAATAGAA  
TAGCCCGTGATGTTGGCGAATCCAATGGCGAGAGAGCCACCAGCTAAGGCGAGCTCACCG  
ACGCGACCGAGGAAGAGCATGGAGATTACGGAGCGAGAATAGAGTAGTAACCCGGTTAGC  
ACCATGGGTAATGCTATGTTGGCTATGCATTTGACTTCGTGAGGGCGAGGGAAAAATGG  
GTTTTATGGGGCTTTTGGTTATTTGGCCTTGTTGGAAGAATGTTGTTGTTGTTGGGGT  
TTGGGGATCAAAGGACGAACATGTCAGGCTCCTCATGAATTTTGGTTGGGGCATGTTT  
GGATGGCCCTCATTGCTTTCACACAGAGTGGAGGGAGATGATAACTGGCACATGGCTCGG  
AGACAGAGATAGTTATAAGGGAGTGCGTGTTTGTGTGTAAGTCACAAAAGTTTTGGTTTG  
GGGATTTGCGTTTTGCAACAAGAGTGTGTAAGGAGAGGTATTTAAAAGGGTGGGTCATT  
TGAAGATTTTTGGACGTATCTGAATTTATTTATGGAGTATCTGAGACGGCCACTAATGGA  
AAGATAGGGTCGACAGAGAGTATTGGCGTTTCCGAGTAGTACCAACTCAAATGCCTCCTC  
CTCACAGTTTTTTTTTATTATTTTAAAAAGAAGCAAATATTCAAAGCGTATTTTTATG

ACCGTCTAATATCGTTAGTGCAGGGATTAGTGGTGAAAGCTAGTGTGGGCTTTGACGTAC  
GTAATATATACTACTCCTATATAGAGTGCCTCGTACTGTAGGAAGGAATTACCGGTTCAA  
ACGAATAAAGGTCAAAAGCGTAGTAATTCCATTCCATTCCAAAATGAGTTAAAAATATAT  
ATTTAACTAATGCACTTAATTTGTTTTGTGTAACTCATATGATCGCTTTATATGAACTG  
GCCTATAGCATGAAGAAGTGTTAGGATTTGATGTATCCGAACCAAATAGGCAGAATTGCG  
TTTAGACGTCTTTCACCTTATGAGGAGAGGACCTATTATGAAAACGGCAGCTTGACTTAC  
TGTTTCTAAGTTGAGAGTTTAATTTGGGTCTTTTATCTTTAAACTTAAACTCGTGTGA  
AATAAATGCCATGTCGGC

>**Gmax\_MSTRG.6397.1** GeneID=Gmax\_MSTRG.6397;Strand=+;Pos=Chr02:7922530-7922920,

ATGGAACAAAAAAGTGAGGAGATGAAAGAAGACTTTACAAGAACACAAAAGCCTGTAAC  
TTCAGCAAAAGAAGTGGCAATTGCAACCCAGAGAAGGAGACAAGTACACCAAGATGTCC  
CACCATCATCAGTGACACAACCTGTAGAAGGTACTGACACATATTCGCAGCCACCATTGG  
AGCTGCCATGGAGCCTACCCTTTTAAGCTCTACACAAAATGCATCATCATCCTCTAATGG  
TGCCACCTCACTCTTCTTAGAAGCGGTGTTGCTTCCTCCTTACCCATCATCTCTCTCAG  
TTTTTCTATGCAAAGCAACGTTTCATGAAACAGATGTTAGACAACAAGATGATCAACAACA  
CGAGTTATATAGAACAAGATCACAAGAAAAA

>**Gmax\_MSTRG.46910.1** GeneID=Gmax\_MSTRG.46910;Strand=-;Pos=Chr09:33369728-33370433,

GAGGAAACCAAGAAATAGAAAGAGTTTTATTGAATTCAATGGAAAATGAAGAAAAAAAT  
GGAGAAAAGTGTGTAGTAGGAACCAATCTAAACAGCTGCAAATTAGTTAAAGTTGATAAT  
CTTACCAAATAGAAATAGGAACCAACATCAATCACAGGATTGTCTAGTAGACCAGCAAGGA  
GAATAATGCATGTACTATACCATTGGTCTAAGCAACTCATAACAGATGATGCAAGGCTTA  
ACTTAGCAAATGACCACAAATCCCTAAATGCCATCCATGAAAATCCAGTCCATTCTTCCT  
TACACCAACCAATGGTATACACAACCAAGCCGCAGCATAAACCCACCCTATGATATTAG  
TCACCATGGCTAAGCCAGTTGTACCCCAACCAATACATTTATGAAGATGTAAAGCAGCA  
CATTTTGTATGACCAAAACAGCAAGTGCTATGCAAGTAATAACTTTAACCTTGATCTGGG  
ACTGAAGAAATGTCTGAAAGGGAAAAGCTATTGCACAGGAAAACATGTAGGGAATTACTT  
GTATAGAATATCTTCCGGCAAGATCAGCTATTTCTTGGTCTTGGCCAATAAAATTTAAGA  
TTGGTGTGGCGTATACATAAATAGGTAAGAGGATTATACAAGTGGCAGTAAGTATAATCC  
ATGATCTTTGAACATAAATACATGTTGATTGAATTTGCCCTGCTCC

>**Gmax\_MSTRG.104177.6** GenelD=Gmax\_MSTRG.104177;Strand=+;Pos=Chr20:36605721-36605828,36606791-36608312,36608596-36609241,

CGCCATTTCTTATTTTACTGCATTAGCTTAGTTACCTTAGTATAGCAATCCTAACAGTT  
CTTGCCTCAAATTTTTCTTTTCAGGAATATTCGATGGATTTTGCACATACTGTGCCAAGT  
GCAGAGCCATAAAGACTTGGAAGTGGAGGCCAAACCTGTTTTTCCCAGTTTGTACAACCTG  
TGATGAGAGATAGCATAATTGTTTGGCAGAAGGCACCAGTCAGTATTCCAATCCAAAGGC  
CTTTTCCTCTTAATTGTAGCCAGAAACCCAATATGGCAGCCATTGGAATTCCCACAACAT  
AATAAGCTCAAAGGTTTACATATGCTCCTATGTGCTGCCACCCACATCCTCTAGCAATAC  
CTATAATGAAGGCATAACTCAGATTCCATTGCTTAAGAAGAGTAATGTGCATTGAAAAAT  
AGTTCAAACAAGAACTAACCTGAAAGGGTACCGTGTAACGTGTCTACTATAACAGATATA  
CTTAAAAGAGGAACCATATCTGTGACATAATCCACCACATCCTGCTCATTGCTAAATACA  
TAACCTAAACCTGCCTGCTAGCAAAAATGATTGAGCTCACCAGAATGGCCTCAGAACT  
GCTAGAGTCATGGCAGCAGAAACAGATACTCGTGCTGATTGTGGACTTCCAGCTCCTAAT  
GCATTTGAAACTCTAGTGCTGAACAACCCGCCCAAAGAGAAACCAATCAGAAAGAGGAA  
AAAATTCATTTACTATAATATCATTCTACATGAATACGAATATGCACAAATTGATGAGCT  
TAGGACTTGTGTGAATCAAAACCTTGCTGCTGAGCCAATTGCTTCTGGGATTGTGTAGAT  
AGTTGTGATGATGGATAAACTGGTCAGAACATAGTTAACAATAACAACAAATTAGCAACA  
CTTGCATGAATGGAAATCAAATTTGGCTGAGTAACAATTTCAACACAGATTTTAAAACA  
CAAAGCCATTCATGTCTGAAGGACTAGGATAAGTTGTACATACCATATGGATAAGACTGA  
AGTTTCAAGCTCTGGATTTGGTAGAAGACCAGAAAGCAAGGTTAGCAGCTCAAATGACCA  
CCACTCAAGGCTGCAACGATCAAATAAGTAAGAAACATACCATGGTTGAAAATTAAATGG  
GAAATAAAAACACAACACAAAAGATAAAATATAAGAGGAAGAACTCACCAAACCATTC  
AGCTGAAGGAATAGCATAGGTGAAGAATTCACCAATCCCATGGAATAGTTCCATTGAAAT  
TGGGACTCGAGTCCTTTCACATTCAGTAGAGAATTTCATATATAAGCCAAGTAAAATCAC  
ATTCAGCCAGTATGAAGTACCAATTGAAAATGCTGCTCCCAAGTTACCAAATCCAGATTT  
AAAGACCATTAACCAACTGAAAGCCACATGGAAGCAAAGAGTAATGGAGGAACTTATGAC  
AAGGGGACTGATCAAACCTTTCATCAAAAAGAATCGAATCAAGGCCTGAAGTGTTGCATA  
AGCAAAGAGAGCAGGGATCATGCACAAAGCAAATTTTCCAGCTTCTTGTGAAATCGAAGG  
GTCTTGGCCAAGAAATATGAGTATCTTCTCCAAGTAGACCCAGAAAAGAGTCAGAGGAAG  
ACAAGCTAAATAGTAGGTCTCAAAGCTTAAGAAGAAAGCAGTGAGATGGGAAAGGAAGAG

ACTTACAATAAGACTGAAGCCAGAGACAGCACAGAGAGAGATGGCAATGGCTGTGCTAGA  
GAGAGCAAGCTTACCCAAGTGACCAACCATCATCATTGAAATAATCTGTAGAAAATACTG  
TGACAAAGTCACAGTAATCATAGGAGCTGCTAGATAACCCACTCTTTTCATTTCTGAGA  
AAAGACAGTCCATGTTATGGCTGAAGCTGAAGGATTCTCCGGCTCTGAGTCCTTATCTAA  
GAGACTATTTTCCATATCCTCTCCAAAGGGTCACAGAATCACTGCACCTTGTCGAAACTG  
GTAGAAAATAATGGCAGGGCTTTGGTGTGTTTGTATGCTAAAAGGTTTAAATATTTACAAGT  
GGCAGCAGCAGTAGTTCTTCCAAGGTTTAAATATTTGTTTCAATAATGACTGTCTCAGAG  
TCTCTCATGGGCTTCCCCCTCTTATGTAGACGGAACAATATTTCAAGTAAATTTTAAAT  
TTAAATCATTCCATCTAATCTAATTTAATCTAAATTTTAAATTTTGATTTCTTATAATTT  
TAAATCTACAATTTTAAATTTTATTTTAAATTAAGACAATTTAGTCAGAACAG

>**Gmax\_MSTRG.69516.1** GeneID=Gmax\_MSTRG.69516;Strand=+;Pos=Chr13:31688211-31688444,  
ATTTGTGTCATTGTTGCCGGTAGCATTATATTCCTGTGATTCATCTTTATCTTCCCTAAA  
TTCTGTTGGAGCGTCAGTATTCATCACTTTGGGGGTACCTTTTCCATGTCTTGAAGCAT  
ATGATCCTCTGGCACAATTGTTTCGCCGAACTTGGCCTTACTATTACCATTTTCAGCTGC  
TTTGGTGTTCAAGTTTTGAATGGTATCTTCTTCAGCCACAAAGGAAGTGGTAAT

>**Gmax\_MSTRG.65157.6** GeneID=Gmax\_MSTRG.65157;Strand=+;Pos=Chr12:38511645-  
38511775,38511902-38511961,38512178-38512512,  
GGTTATTGGAACAAAAGGTGGTTGATGGGTAGGGGAAGGGGTTTTTGGAGGGTTTGGAGT  
GTAGGGAGGTTGAGAAATAGGAGAGGGAGTGTTTGGAGGGGTTGGGACATAAGGTTGGTT  
GCCAGGGGAAGGTGTTTTTGGAGGAGTGGGAACATTTGGAGGACTATAAGAAGGAGAAGG  
TGTTTTTGGAGGGGTTGGAACATAAGGTGGATAAGGAATTTTGGAGGAGTTTGGAGGAG  
TGTTGGAACATAAGGTGCTTTTGGAGGAGTAATTGGAACATAGGGAGTGTTTGGAGGTGT  
TGGAGGATAATAAGGAGGTGGCTCTCTCACAGCCAACACCACAATAATCAATTTCTGACC  
CTTTTACAATTACCATCTTTCCCACTAATGAAGTAAAATGGACCCGATCGATCAAAGT  
AAACTCCGATTCACTATCCTCAAACCTTCTTGATCGGGTTCTTCTTGTTACATTTCTCATA  
ATCATCCTTGTTCAACCAACACAGTATCCGAGCCCTTCTTGTAC

>**Gmax\_MSTRG.55220.1** GeneID=Gmax\_MSTRG.55220;Strand=-;Pos=Chr10:49047749-49049365,  
TAAAAATACATTTTAAATAAAATACAAACTAAAATACTAATTATACATATATTAGAACTA

GGGGAGCTCAATGTATTTTATTTTGGTACAAAAGGAATAAAATAAAAACAAGACAAAGA  
ACCTAAAAAATAACTACTATTCTCGGGTGAATGCAACACCCATAACATCTGCCATCAGT  
ACAGTGGATATGTCTTCTGAAGTGGGATCATTCCAAGTTAGAAATTGTTTCTCTTGAGAA  
GCACTCTTTTGGCTAAGAAATCTGCCCATGCATTACCTTGATGTAATGTATGTCTAACA  
TGAACAGTCCTACTTAACAGAGAAGTGCTTGAATTCTTTGATGATTACTGCAGAGGGG  
TGGAACATATTGGTACTCCTGATAATCGATATGGCATAAGTAGAATCTGAAATCATTGAC  
TCTTAAACACGACTCCAAGCCTCTTGAAGTCTCTTATGAAAAGTAAACACGTTGATAA  
ATATTCGTATCAAGATCATGTTGATAAAAAAAAAAAAAACAATATTAACAACATATCA  
TATTTAATATTTCAACATAATTTTAAATATTTAATAATTTAAAAATAAGTATATCAATA  
TCTTTACATCAATATTGATAAAGGGAGATAGATGAGAGGGAGGATATAGAAAAAGCGAGG  
AGAGTGAGAGTGGGAAAGTTACCAACCCAGCTCTGCGAGAAAACTTAAGACACTACAA  
ATTTAACGAAAAACAATAACAATGAAAAATAACAAACAAAATCTCATAAAGCATTACTT  
TCAAGTTTCAAACAGCTAAAAAGAGGTTGAGCTCCTACTTCTCATTGAGAGTTGTT  
CATGTCATTAGAAAATCGGCCTTTGATCATGGGTTTCTTATACGAGTCTATTGTCTGCTG  
AAATTCGCTATCAAATAACCTTTTTCTTGCCTTGATAGCCTGCATTGGTATTGAGTAAG  
ACCACACAATTCAACAAAATGCCTAAAGTGGTAGCCAGGCAAAGAATTATATACTTGTCC  
TTTTAAATTTGTTAAACAAGAATATTAATTTTGGGGTTTTATGACAAAGGTTAGAGGAC  
ATATATACCTGTTGTTCCCAATTTATGCAACTTGTTATGGTAGAAAATAGAATACATTGA  
ACAAAAGCACCGACTTGACACCAATCCAAAGTCCTTTCTCTCATTCTTAGCCAAAAAT  
GCCAGTGTGGCAGCAACAGGAATCCCAACAAAGATAGAATGCCCTAGATTCACATAAACC  
CCTATGTGTTGCCATCCACAACCTCTAGCAACCCCTGAGCCGAAGTATTATAAAACAAAT  
TGAGACAACGTTTCTTCTATATAAAATTTACCTAACAATAGAGAAGACAGAATTTTAC  
CAGCGAGAACGCCTTGATGCTGTCCAGTATAACAGATATGCAAATCAGAGGAGCCATGA  
CAGTGACATAATCAACAACCTCCTTCTCATTGCTGAAAATATAACCAAAATCATGGCGAC  
AGACAAAGAGGGTTCCGCTAACTATAGCTGTCTCCATGATTGCAAAAGACATTGCAGCCA  
ACACAGCAACATGGGCAGCATGTGGATTCCCTGCTCCTAATTCATTTGAAATCCTTG

>**Gmax\_MSTRG.55225.1** GeneID=Gmax\_MSTRG.55225;Strand=-;Pos=Chr10:49058648-49059711,

TGAAGGAATAGCACAGCGGAAGAAGTCCCCAATGCCATGGAATAGTTCCGTTGAAATTGG  
TACCCAAGTCTTTTTACATTCAATAGAGAATTTTATGTATAATACAAGTAAAATCACGTT  
CAGCCAGTATGAAGTACCAATAAAAAATGCTGCTCCTAAGTTACCAATCCAAATTTAAA

AACCAGTAGCCAACAGAAAGCTACATGGAAGCAAAGAGTAATGGAGGAACTTATGACAAG  
GGAAGCTCTGAAGGAGAAATAGGCTAACACAATAACAACTCTATAACAGAGTAATAGGCA  
GTGGAAATAAATCCTCCCAAACCTTACAGAATCTGTGAGGATAAAGTATAGAGCACAAAAT  
AGAAATTAAAGATAAGAAAGACACCATTTGTGTTTAAAGTGAAAAATCCCTCAATGCAAG  
GGTAAAAATCACGGGCCGTCTAGACCAAATAAATAACTCCGATATAATCAATGAAGATAC  
AAGAGAACCTCCAACTTCAAATATAGAACAGATAATGCGAAACACTTATCTCTCTCTA  
GATATCTTTTTCTGATCCAATCGAACAATTTGAAATATCACGCGCGTAGAATTTGCTAT  
CCAAAAATCAACCTGATTTAACGGTGAACAAATCCGCAGTTATAATCTGAAAAACAAAAT  
CACCATAATTTTCTCTCTCTCTCTTTCTTAACTGTTTTCTATCAAATAGTCCCTATCA  
CTGTATCTCACCTCTAATCTCACTTAAATAAGTGAGATATACAGGTCTTCTCATTTGGG  
GTCAAACCTTTGCATCAGAAAGTATCGAACCAAGGCCTGAAGTGTTGCATAATCAAAGAGA  
GCAGGGGTCATGCACAAAGCAAATTTTCCAGCTTCTTGAGAAATCAAAGGGTCTTGGCCA  
AGAAAAATGAGTATCTTCCCCAAGTATACCCACAAAGGACTCAAAGGAAGACAGGCTAAA  
GTAAGAGAGACAATAGCAGTGTACATTTGAACACCAAATTTTCGATATTGATGTGCTCCG  
TATGCTTGCCACATTGAGTTTCCAGTGCACATGACATTGCAAA

>**Gmax\_MSTRG.104177.5** GeneID=Gmax\_MSTRG.104177;Strand=+;Pos=Chr20:36605682-  
36605828,36606807-36608312,36608599-36609160,

AAATACCTTGGAATGAGAAAGAAGCAGAACAATTATCGCCATTTCTTATTTTACTG  
CATTAGCTTAGTTACCTTAGTATAGCAATCCTAACAGTTCTTGCCTCAAATTTTTCTTTT  
CAGGAATATTCGATGGATTTTGCACATAGCCATAAAGACTTGGAAGTGGAGGCAAACCTG  
TTTTTCCCAGTTTGTACAACTTGTGATGAGAGATAGCATAATTGTTTGGCAGAAGGCACC  
AGTCAGTATTCCAATCCAAAGGCCTTTTCTCTTAATTGTAGCCAGAAACCCAATATGGC  
AGCCATTGGAATCCCACAACATAATAAGCTCAAAGGTTTACATATGCTCCTATGTGCTG  
CCACCCACATCCTCTAGCAATACCTATAATGAAGGCATAACTCAGATTCCATTGCTTAAG  
AAGAGTAATGTGCATTGAAAAATAGTTCAAACAAGAACTAACCTGAAAGGGTACCGTGTA  
ACGTGTCTACTATAACAGATATACTTAAAAGAGGAACCATATCTGTGACATAATCCACCA  
CATCCTGCTCATTGCTAAATACATAACCTAAAACCTGCCTGCTAGCAAAAATGATTGAGC  
TCACCAGAATGGCCTCAGAACTGCTAGAGTCATGGCAGCAGAAACAGATACTCGTGCTG  
ATTGTGGACTTCCAGCTCCTAATGCATTTGAACTCTAGTGCTGAACAACCCGCCAAAAA  
GAGAAACCAATCAGAAAGAGGAAAAAATTCATTTACTATAATATCATTCTACATGAATAC



GAATATGCACAAATTGATGAGCTTAGGACTTGTGTGAATCAAAACCTTGCTGCTGAGCCA  
ATTGCTTCTGGGATTGTGTAGATAGTTGTGATGATGGATAAACTGGTCAGAACATAGTTA  
ACAATAACAACAAATTAGCAACACTTGCATGAATGGAAATCAAAATTTGGCTGAGTAACA  
ATTTCAACACAGATTTTAAAACACAAAGCCATTCATGTCTGAAGGACTAGGATAAGTTGT  
ACATACCATATGGATAAGACTGAAGTTTCAAGCTCTGGATTTGGTAGAAGACCAGAAAGC  
AAGGTTAGCAGCTCAAATGACCACCACTCAAGGCTGCAACGATCAAATAAGTAAGAAACA  
TACCATGGTTGAAAATTAATGGGAAATAAAAAACACAACACAAAAGATAAAATATAAGAG  
GAAGAACTCACCAAACCATTCAGCTGAAGGAATAGCATAGGTGAAGAATTCACCAATC  
CCATGGAATAGTTCCATTGAAATTGGGACTCGAGTCCTTTCACATTCAGTAGAGAATTC  
ATATATAAGCCAAGTAAAATCACATTCAGCCAGTATGAAGTACCAATTGAAAATGCTGCT  
CCCAAGTTACCAAATCCAGATTTAAAGACCATTAACCAACTGAAAGCCACATGGAAGCAA  
AGAGTAATGGAGGAACTTATGACAAGGGGACTGATCAAACTTTGCATCAAAAAGAATCGA  
ATCAAGGCCTGAAGTGTTGCATAAGCAAAGAGAGCAGGGATCATGCACAAAGCAAATTTT  
CCAGCTTCTTGTGAAATCGAAGGGTCTTGGCCAAGAAATATGAGTATCTTCTCCAAGTAG  
ACCCAGAAAAGAGTCAGAGGAAGACAAGCTAAATAGGTCTCAAAGCTTAAGAAGAAAGCA  
GTGAGATGGGAAAGGAAGAGACTTACAATAAGACTGAAGCCAGAGACAGCACAGAGAGAG  
ATGGCAATGGCTGTGCTAGAGAGAGCAAGCTTACCCAAGTGACCAACCATCATCATTGAA  
ATAATCTGTAGAAAATACTGTGACAAAGTCACAGTAATCATAGGAGCTGCTAGATAACCC  
ACTCTTTTCATTCCTGAGAAAAGACAGTCCATGTTATGGCTGAAGCTGAAGGATTCTCC  
GGCTCTGAGTCCTTATCTAAGAGACTATTTTCCATATCCTCTCAAAGGGTCACAGAATC  
ACTGCACCTTGTCGAAACTGGTAGAAATAATGGCAGGGCTTTGGTGTTTTGTATGCTAAA  
AGGTTTAAATATTTACAAGTGGCAGCAGCAGTAGTTCTTCCAAGGTTTAAATATTTGTTT  
CAATAATGACTGTCTCAGAGTCTCTCATGGGCTTCCCCCTTATGTAGACGGAACAATA  
TTTCAAGTAAATTTTAAAATTTAAATCATTCCATCTAATCTAATTTAATCTAAA

>**Gmax\_MSTRG.93967.1** GeneID=Gmax\_MSTRG.93967;Strand=+;Pos=Chr18:23063092-23063383,

CTTTTTCTTCAATACTAATATTATACTAAAACACTAGAAGAATTATTAAGAAAAACATA  
ACATTACTCATTTATTTTTTAAGGAAAAAAATGAATGCAGGATCGTCCACCTGATCCATG  
GGAAAGAGAAACAGCAAACAACTAAGTCATGGCTTGAAAAAAAATCAATAAAAGAAGGTA  
CACCTGCTTCTAGAATTTTCAAATTTTCATGTTTCTTGATCATTCTTCGCTATAGCATG  
CGTTTTTGAATCTTCATGCCACCCCACTGCTTTATTCTATCTTCCGCAAGG

>**Gmax\_MSTRG.82352.1** GeneID=Gmax\_MSTRG.82352;Strand=-;Pos=Chr15:51267918-51268113,51280055-51280065,

ACAACGAAATTACAACTGATCCTAAATGGTGAAAAGTGATACAAAACATTTTTCTGCTC  
ACAACGAAATTACAACTGATCCTAAATGGTGAAAAGTGATACAAAACATTTTTCTGCT  
CAACAACGAAATTTCTTTTGTAGATGTCATCATCAAGACATTGAGCGGCCTCTGAGAAA  
ACGCCAAGGTCCAGTTCCTGTTCCCAT

>**Gmax\_MSTRG.46911.1** GeneID=Gmax\_MSTRG.46911;Strand=-;Pos=Chr09:33370831-33371123,

CCTGACATCACATGTGAAGCACTATTGATAACCATTGATACGCCAAGAAGGTATGCTAAA  
TCAGCAACAGCTCGAATCATATCCTTACTGTTGGTAAAGATCTTGGCAAACATCTTTA  
CTCAAGAAAATGACAGTCATGAAAACAATGCCGAGGAGGAGAGACTGAAACATTGTCACG  
CAGAAAGAGTATATGGCTGCTCTTGGATGCGACTTGCCAAGTATATAGGAGACACGAATA  
CTTGGAGGGCATAGAACCAATAATCAGTGTAAGAATTGAAAAATATATAAGCA

>**Gmax\_MSTRG.93968.1** GeneID=Gmax\_MSTRG.93968;Strand=+;Pos=Chr18:23066532-23066883,

CCATGACCCCCTTGTCAAGCTTGTACCCTAAAATAAGACCCAGAGGAATACCGAAAAAGT  
AGTAACAAGCAATATTCACGTAAGCAACCACAGCCTGCCACCCTGCGCCAACAGCAACAC  
CTGAGAGAACGGGTTGCACGTTGTTGATGACAATGCAAAGGGCCAACATGGGCGTGAGCT  
CTACCACAATCTTTCTCACTTCTGAATCATTTGAAAACAAGAAAGGGTACTGGTTCCGGA  
AGATTATCAGCACCATCGAGAGCATGACACCGATCAGAGTTGAAGTAATCACAGCAACAA  
GAAGTGAAAACCTTTGCTGTTCTTGGGTGACATGCTCCTAGTTCATTTGACAC

>**Gmax\_MSTRG.54536.1** GeneID=Gmax\_MSTRG.54536;Strand=-;Pos=Chr10:46173137-46173501,46173594-46173706,

TGCTTCATAGCCAAGAAGGAACCCCAGTGGAAGCCCAAATAAGTAATAACAACCTATGTT  
GATGTAGGCCACCAGGGCTTGCCACCCACCTCCAATAGCAACACCTGCAAAAAAACAC  
TGGTTGAACACTGTTTAGAACCATTGTCACAGCAAGGAGGTATCCTAGTTTCGCAACAGC  
CTTATGCAAAACCTCACTGTTTGTA AAAATGATGGCATAATAATCTCTAGTCGCCAAAAT  
AATAGCCATGAAAAAGATTCCAAGAAAAGCGACTGAAAGACTGTCACATAGACAGAGTA  
CTTGGCAGCTCTTGGATGTCCAAGCCCAAGTTCATTGGAAACTCTGACACTGAAAATGAG  
AAAAACACAAACATTACGTGGCTAAGAGAAAAGCCTGCATTGCAAGCAACCAATACTAAC

AATGTGAAATTGTCAACATATTTGCCAGAGTAGACAGACAATGGGATAAATAACAGCA

>**Gmax\_MSTRG.55221.1** GeneID=Gmax\_MSTRG.55221;Strand=-;Pos=Chr10:49053505-49053763,

AAGAAGACTGAAACCAGTGACCCCTGATAGAGAAATGGCAAGGGCGGCGCTAGAGAGATA  
GAGTTCACCCAAATGACCAACTATCATAGTTGAGACAACTTGCAACAAATATTGTGAAGA  
AACCACTGCCACCATAGGCCCTGCTATATGGCATACCCTTCTCATTCTTCACTATAAAC  
ACCCCATGTTACTCTTTCTTGCTCATGTTTCTTTACTAGACTTTCTTCCATGCTAGAGAG  
AGAAAGAAGCAAGATCTTT

>**Gmax\_MSTRG.10869.1** GeneID=Gmax\_MSTRG.10869;Strand=+;Pos=Chr03:496734-496767,505757-506089,

AACACTGTTTAGTAGAATAGAGATTGCCAACAAAAACAAAGGTGACAAGTCCCCAACGGC  
ATCGGCCACGTCTTTATTTGAGGTAAATATGTAAGCAAGTTTTCCCCTTAAAAATAAGAA  
AAATAAGAAGAGAACAAATCCAATGGCCAAGGATGTAAGCACTGTCACAACTATAGAGAA  
CTTTCAGCTTTGGAGCTTCCTTTTCCAAGCTCGTTTGCCACTCGAACACTGCAAATGAG  
AAACCATAAAGTTAGTATTCCATGGTAAATGAACAATAGATGAAAATGTGGTAGGTTTAG  
ATGTGTGTCTGTGTGTGTTGGTGCTTGTTGAGGTTGGCCTTCTTGGCAAAACCGTCCACA  
ACCCCTC

>**Gmax\_MSTRG.54534.1** GeneID=Gmax\_MSTRG.54534;Strand=-;Pos=Chr10:46170368-46170785,

GCCAATGACGGAGTTAATGAGGGAGATAGCAGAGAGCTGAATGTCGCCGAGGTGTCCAAC  
GAACATGCTGGTCACGGAATTCACACCGAACTGACACCATATGTTGAAAACAATGGGCAT  
CGCAATCTGCCCACTCTCTTCGTCTCAATCCAGAACACCTTCTTACCTCCTTCAGCTC  
CCTCACCGCCACGTAGTCGCCGTTCTCCGTCACCAGCGCCGCCCTCGCCTTTGGCCAG  
CAGCAGGGGAGCGTCCATCTCTCAGTCACCCTACACGTCTACGCCTCTGATTGACGTTA  
AACTCTCACGGGCTTATATCCTGCAACTGCATATGCACATCCACCACTCCACCAGTGCAA  
TTTTCTTTCTTCAGTATTTATTATTATTATTATTCATACAACGAACGTAGAATGTAC

>**Gmax\_MSTRG.549.1** GeneID=Gmax\_MSTRG.549;Strand=+;Pos=Chr01:2754609-2755346,

TTTGCATCTGTAAGTGTTAAGAAAAGATAAAAAATATCGTGTAATAAATAAAAACT  
ATAGAAGTATTCATGTGTATCATAGTATTTAATATGTACTGTTAAAAATAAAAAATGTA

GAATTATAAAATGCTGCTAGCTAGACACGGATACTATTAGTATTCATGTGTATCAGGGTG  
TGTATATGATGTAGCCTCTTTCATCAATCATGAACCGTAGTTATGTGATTATGGAGAGAA  
GGATTTTACCATTATGCCGTAGGAGAAGCCGGCGATGAGGGAGTTTTCAACGGAGACGGC  
GGCGAGGTCAATGGTGCCGACGTGGCCGGCAAAGATTTGAGTGAAGGCGCCGAGGGAGTA  
CTTTGAGACGAAGGAGAAGATGGCGGGGGCCGGCGAGGTACCAGAGCTTCTTTGACTCCAC  
CATGAATTCCCTATAGAAGTCGCCGGCGCCGGTGATCGGAGCTATGTCAGGGGTGCCGGC  
GCTAAAACTGCGGTTGTTTCTGCTGGGTGAGGGTGGATTTGATGGGGTTCGTCGGCCCT  
GGCCGTGAGAAGTGGCTGTGTGGAGGAGTTGCCATCTGAGTGTTTCATATTGCAGAGAGA  
GAGAGAGTTGGAGTGAAATGACAGAGCAGAGTTTTTTGATAGGCTCAACAGCAAGTGTTA  
CAGACCAGGTTAATTTATATATATGACCTGGCTTATCAACATTTTAATTTTATTTAATAG  
AAAGAGATCATGTAAAAG

>**Gmax\_MSTRG.70932.1** GeneID=Gmax\_MSTRG.70932;Strand=-;Pos=Chr13:37696399-37696766,

CATAACTGCCACGCCAGTGACACTGAACCATGAATTTGCAAGAGTAGCACCAGCAAGCTG  
AAGCTCACCAAGGTGACCAACAAGCATGACAGAAACCAAAATGATCAAGTGATAGAACAA  
GTTGGTAAGAATCATTGGCAGTGAAAACAAGAGTTGGTGCTTGGCCTCTTCCATGTCCAA  
CACTTTGTTCCACCATCCCTCAGCTTGGGGGGATCTTGTGTTTTGATCTCTTCCATTATT  
ATCAGATGCTCTCAATAGGGGTACTCTGTTCTTCTGAACTAGAACTTGCCACCATCTT  
CTCTATCTCTCTTTTATCTGCTCCACGTTTTCCATATATATGTGTAAGGAAGCACTTTG  
AATTTTTG

>**Gmax\_MSTRG.62820.1** GeneID=Gmax\_MSTRG.62820;Strand=-;Pos=Chr12:8609947-8610587,8611168-8611712,

AGAGAATCCAGAGCCAACTCAGGGTGAGGAAGCAACCCTGCAAGCAGAACCAAAATTTGG  
AAGTACCAGGTCTCTAGGCAGAGCATCACCGCCGAAGCAGCAGACAGCTTAAAAAACTCT  
GGCAAGCCCGAAAACGCTTGAAAACTGAACCCTCTCCAAGTGCTTACACTTTTCACTC  
TTGACAATGTACACAACTGTGCAATCACAATGATCCACCACGAAACACTCAACACCAGC  
GACGCACCCAACAGACCAAGCCCCACCTCGTACACAACAAAATAACTCAACACAAGATGG  
ACCAACAACGTTGCTGTTGAAATGTATGCGCTTGGAGCCACTATGCTCTGGGCTTGGAGG  
AATTTTTGAATGGGGAAGTTTACAGCGTAAGCGAAGATTTGAGGGATTAGGCCGTAGACG  
AAAAGTGCTGCTGCGGATGCGATTCTTGGGGATTCTCCTAGGAAGATTAGAATGGGTTCG

GAGAAGATGTATATGATGGTTAGAATAATGCCTGCTAGCGTCAGAAGCACCGTTGATCTT  
TGCAGCAATGAGATGGAGAGAAACAGGGTGAGTAGTACTGTACCATGAGGCCATAAGCGA  
AGACTTGGATGCCGGTGTTTCCAAGAGAAGCAGCAGCAAGTTCAAGGTTACCGAGGTGGC  
CTGAAAAGATTTGTGTGGACATGGACATGACATAGTTGATAAGGTAGACGATAACAGCAG  
GAGCAGCAAGGTGAAACAAGAGCTTCAACTCCACCCATGTTGCCGGTCCAAGACGCTTCG  
CGAAAGGGACGCTAGTGTTTGAGAGTATTCGCTCAAGTTCACCATCTGATCCATGCTTTG  
AGCTGAATGATTGAGTACAAGAAGGTGGCTCGGGTGAAGGTCGTTTGAGACCAGCAAAG  
GTTTCATCAATGTCCTTGTGAAGTATGTAGAATCCATTTGGGAACTAACTTGTTTATGTT  
TGGAAAATGTTGTGGACTAAGCCTTTTTTCCCTCTGCAGCAGAGGAGGTTTTGAGGCTCA  
ACTACAAAAGGATTGGATGGGATTATATATTGTCCACTCTTAAATACGTTTTTAATTCTT  
TCATTTCAATTTGTTTTTGTCTTGTCTTGGTTATAATTTTTTTTTAAATAGTCATTCTC  
ATTAATATTATTTAGTGATATGTAACCTGTATCAAACCATGTCTAG

>**Gmax\_MSTRG.46905.1** GeneID=Gmax\_MSTRG.46905;Strand=-;Pos=Chr09:33355690-33356316,

CAAATAGAATAGGAGCCAACAGCAATCACAGGATTGTCTAGAAGACCAGCAAGTAGCATA  
ATGCATGTCATATACCATTGCTCTAAGCAACCCATTACAGATGATTGAAGACTTAACTTA  
GCAAAGGCCAACAAATCCCTAAATGCCATCCAAGAAAATCCACTCCATTCTTCTTGCAC  
CAACTAATGGTATAGACAACCAAAGCCCCAGCATACAACCACCCTATAATATTACTCACC  
ATGGCCAAGCCGGTTATACCCCAACCAATATATTTATGAAGATGTAAAGCAGTCCATT  
TGTATGAGCAAAACAACAAATGCTATGCACATAATAACTTTAACCTTGCTCTGGGCCTGA  
AGAAATCTAAGGGTGGGAAAACTATAGCAAATGAAAACATGTGGGGAATTACTTGAATA  
GAATATCTGCCAGCAAGATTAGCTATTCCTTCATCTTGGCCAAGCAACTTTAAGATTGGA  
GTGGCATATATATAAATAGGCAAGAGGATTATACAAGTGGCAGTAAGTATAATCCATGAC  
CTTTGAACATAAATGCAAGTAGATTGAATTTGCTCTGCTCCAAAAGCTTGGCCACAAAGT  
GTGGCCAGTGCAGATGACATACCAAAC

>**Gmax\_MSTRG.46371.1** GeneID=Gmax\_MSTRG.46371;Strand=-;Pos=Chr09:18849747-18850399,

GGTTTTAGACCCATTGCAGCTAATAGAGGTTTTGCAGCAAATATAAGGGTTGTTGCTTGA  
AGGAGACCAAGGATTGTGCCAAAAAGTAATGCTGTGGATGCTGAAGCAACGTGTCGCTTC  
TTCCTTCATCTTTTGGCACACTCTTGTTACTGCTACTACTAGTATCAGAGGTAGAC  
TTGCATATACTTGTATTGCAATCTGATAAAATGTGAGAACACAAAATTTCAATGCATTAA

TTTCCCTCCATTCATATATCTAAGTTTATCATAATGAATGTCCTACTCATTGGTTTGTGC  
TTATGCATTTGAACCAAATTAATTTACATCAACATGGACATTTATACACAGCAGTAGAAA  
AGGAAAAACTAGAAAGGGATAGAAAGTACCATTCATTTCCACATTCTCAGTCTCATTGTT  
CTCTTTGGATGCAACTTTCTCTATGTCTTGAAGGGAATGATCATCGAGCATTACTTGTTT  
TTTGGACTTAGCCTTATCACTTAACTTCTTTTCTGTATTGATTTTTTCAATGGTATTTTC  
CTCAGCTACGAAGGAAGTTGTGATGCTAACCAAAGGGAAGATGGTAATCCTTGAAGCTTG  
GTTGAACAAAGCAATGGACACTCCTGCAGCAGCAAGCTCCACGGGCCCTAAAC

>**Gmax\_MSTRG.47701.1** GeneID=Gmax\_MSTRG.47701;Strand=+;Pos=Chr09:40368419-40368631,  
AGCTTTAATTTTAACCATCTACTTGAATTATATGTTAAGATTCGTTCTTTTGAACTCTC  
ATATGTGTAATGTGTGCGTGTGTGTTGAGAAAGAGAGAGATGACATTTTGTATGGTGATT  
TAAATTAATGCCTCATGTCTTTAATTCTGTAAAGATGACATCAATTCATTTCTGTGATG  
GTAAATGGATCTCTCTGTGGCAACTCCTGAGGG

>**Gmax\_MSTRG.65157.7** GeneID=Gmax\_MSTRG.65157;Strand=+;Pos=Chr12:38511645-  
38511775,38511902-38511961,38512088-38512282,38566213-38566222,  
GGTTATTGGAACAAAAGGTGGTTGATGGGTAGGGGAAGGGGTTTTTGAGGGTTTGGAGT  
GTAGGGAGGTTGAGAAATAGGAGAGGGAGTGTTTGGAGGGGTGGGACATAAGGTTGGTT  
GCCAGGGGAAGGTGTTTTTGAGGAGTGGAACATTTGGAGGACTATAAGAAGGAGAAGG  
TGTTTTTGAGGAGTTGGAATAAATGGAGGATGATTAGTAGGTGAAGGTGCTTTAGGAGG  
AACATAGGGAGGACTGTGAATAGGAGAAGGTGTTTTTGAGGGGTTGGAACATAAGGTGG  
ATAAGGAATTTTTGGAGGAGTTTGAGGAGGTGTTGGAACATAAGGTGCTTTTGAGGAGT  
AATTGGAACATAGGGAGTGTTTGGAGCAGGTGTTTT

>**Gmax\_MSTRG.8277.1** GeneID=Gmax\_MSTRG.8277;Strand=-;Pos=Chr02:31120425-31120669,  
GTAAAGAATCACTTTTTTCAAATAAAAACTATCATTTTAATAGAGCAACCCTTACCCA  
CAAAGGGAGCAATCACTTGCAGTAGTACTAGTATTCCATGATGGGAGGATTCTCTTCAAT  
GTAGCTTGTGTTGTGCACATGAGAATCAGAATACCAAACTCTCAGTCGTTAGTAATAGG  
CTGGTACTACTAAAGCCCAACATTGTTTACCTTAAGGAAGCTCCAAGGCCCTGATCCAGT  
ACCAA

>**Gmax\_MSTRG.10870.1** GeneID=Gmax\_MSTRG.10870;Strand=+;Pos=Chr03:497768-497800,506951-507465,

GACAACAGGCCAAAGATCTTTGAATGCCAAAAACAAAATGAGAAACCTTTCCATGTATC  
GGAGACCAACCACATGTTATAAATATTAGTTGACCAATATTAGGAATCCAAAATGCCAA  
ATTTGTTGAAGTCATTGCACCAGGAATCTCGAGCTTGAATTGAATTGTCAATAGCCAAGA  
GAGGAACAAATGAATAACTATTGAGAATGCTGCCAAGAAAGAAATGATGGTATTTTGTCT  
TTGAGATTGCAGGAAATTCTGGCAAGTGAAAGAGGCAATAAAAGCAAATATCATAGGAAT  
TGACCAAAGAGAAATATTTCTGCCACTTCTGCTATATTCTCATCTTGGCCTAAGAGCAT  
CAAAATCGGCCTCGTGAAGATGAACACCGGAAGAAGAAAGAGTGAAGTTATGGACATAAC  
TATCCATGATCTTTGAAGATGCACTCCCATCATGACATATTCTTTGCACCGTATGCTTG  
TCCGCAAAGTGTTGACAACGCACTCGCCATTCTAACTAGAGTTGTTACAACAGACACAA  
ATAACTTG

>**Gmax\_MSTRG.55223.1** GeneID=Gmax\_MSTRG.55223;Strand=-;Pos=Chr10:49056210-49056895,

CCCAATTTATGCAACCTGTTATGATAGAAAGTAGAATACATTGAACAAAAGCACCACTTT  
GTATGCCAATCCATAGTCCTTTTCTCCCAATCGCACCAAAAATGCTAATAAGGCAGCCA  
TTGGAATCCCACAAAGGTAGAAGGCCCTAGATTGACATAAACCCCTAAATGTTGCCATC  
CACAACCTCTAGCAATCCCTGAACCAAATAATTAACAAATTGAGAGAAAGCTTTTCTTC  
TATATAAAATTCACTTAAGGATGGCCATTGAGAGAAAGAATACCTGTTAGAACACCTTGT  
ATGCTGTCTAGTATAACAGATATACATACCAGAGGAGCCATGGCAGTGACATAATCAACA  
ACTTCCTTCTCATTGCTGAAAATATAACCAAAAACATTGCGGCAGGCGAAGAGTGTTGCA  
CTTACTATACTTGTCTCAATTACTGCAAGAGACATTGCTGCTAACACGGCAACACGTGCA  
GCATGTGAATTCCCAGCTCCTAATTCATTTGAAACCCTTGCTGCTATAATCAGAGAGGAGA  
AAAGATAATTAGTTTAGATGCATGCTCAAGGCAGCTGGGTACTAGTGTAAACATTTAACT  
ATGAAGAATGAGTGTGTCTATGATGCAACCTTGCTGCTGCACCAATTCCAAAGGGTATCG  
TATAGAGAGTTGCAATGGTGTGAGG

>**Gmax\_MSTRG.46912.1** GeneID=Gmax\_MSTRG.46912;Strand=-;Pos=Chr09:33372465-33372784,

GGCAAAGATGAACGTTTATTGATACGTGACTCCATAAACTCTACATTTTTTTTTTTGGT  
GGGTCCATTAACCTCTACATAGTGAAGTGTGTACAAGTCGTCTTCTACAGTTCTACTAGATC  
AATCAACCAAAGTAAAGGGACATATGTAAACCATAAATGGATTAACTGCACACTCTTTT

ACCATATTCTTTAAACATACTCTATGTTATTATCTTGAAGTTTAGAAGAAAATATAAAA  
TTATGTAAGATTCATTTCTTATTAAATGAATTTTTACATAATTTTATTAATTTTCAGTAA  
AATGAAACGTTGCTATTTCT

>**Gmax\_MSTRG.6169.1** GeneID=Gmax\_MSTRG.6169;Strand=+;Pos=Chr02:6597684-6598881,

GTCAAACAAGTAGAACCAACTCTTAATAACAGGTAACTTCAATTTAGATCAAAGTCACG  
ATCTAAATTGATCATGAGTCAGCAGTGTGGACTGTGGAGAATCAAATTGTTGGCGTTTAG  
CACAGGTCGAGTTCTGACGCGAGTTATACACGGCTTGAATAATTATCAAGTGCTGCATTG  
TGTGCAACAGCTTTCAGGCAAAGCTGCTTTCAGTTTAATCTCTGTCTCTTACGTCTCAGC  
CTTACATCTAAAATATTATCAAATGTCAGATGCCAGATTCTCACATCCAGTCACATCTCC  
ATGCACTTGTCACTCACAACACAGCAAAAGCTACTTTTTCATCACAATACCCAAAACAAA  
ACTTGCCCATTAGGAACACAAGAGAAGGTGAGAGAAAAGTGCTAAAATATGTAAACAATT  
GGTATCGAAAATGAGATTTGGATTGGAATGGTTTCCCAAGCAAATTAATTAATTTTAA  
AAAAATAAGATAAGCCCTCCTCAAAATTATCATAAAGCAACCACTCACAAGCCTCCAACC  
CCATTGATCCTACCCACCAAAACAAAATCCCAATGTCATAAATCATAATTGGTGTCATTTC  
ATTTCTCTAGTGTGGTGTCTTTTTCTTAGCAAATGTCATCTTTGTTGTTCCCATTTCCA  
TTCACCAACAACCTTTTCTTCTCATCTCTCATTTTCCTTATTCTAAGCCCATTG  
CAACTACCCATTTCAATCCTTGTGAGCTTCTCAGCCTTCAAAGCCTCAGCTTCCCAATCT  
GTCCTCACCAACACAACATAGAGGATTGACACAGCACATGCAACCTGGGCCGACAGAAGC  
CCAAACCAAAGCCCACTGAACCCAACCTTGAACCAAATGCCAGGCCCACTGCCACCGGG  
GTGCCCACAAAGTAGAAAGAGCCCAGGTTTATGTGAGCCCCAATACCAGGCCGGGCCATG  
CCACGAAGGATCCCACAGCCCGTGGTTTGTGGGCAGTTTCCAAGCTCACACAAGCCCATA  
ATTGGCATAACTGATGCAACCAACGCTTTGACGGGCTCATCATTGGTGAAAAGCCCAGCC  
CATCTTTGACCCAGAATCACAGTCCATGTCACATTGATGAAGCCTATCACAAAAGCACAT  
CCTAAGGCAACCACTGCTGCTAGCTTTCCTTGTATGGTTTTCCAGCTCCAAGCTCAT

>**Gmax\_MSTRG.21809.1** GeneID=Gmax\_MSTRG.21809;Strand=+;Pos=Chr05:4903580-4905472,

CGAACTAAATAGTTTTCTTGAGTGCATTCTGATCATTCAATACAAATATTAGACCAAC  
GGGTAGTTCTACTTCTACCTATTGATTTAAATGCATAATCTTGTAATTTTCAAATCCGA  
GATCGCAAACACTCAGAATGGTATTGAGAAAGGACTCAGCAAATGAACATTGGAGTATG  
ATCACCGGTTTTGACTCTTGAGTGTGTCTACGACTTCTATACGTTTCTGATTCTTCCTCA



CCAAGTGTTATATACATGAATATGGGGTGATAGAGGTTTCTTGCACACTTGATCACCTT  
CAGGGTTTTAGTAAGTTCATTTACCTCATTTCTTGAACTTGTTTCATGTACCTGTGCGT  
TACATACAAACGTTTGTGCCTTGGTAGCTTCTCCACCCAATTTATTCTCACAATAAATG  
TTAACAACAGAACCAAGCAAGCAGCAATACCAATCAGGAGTCCTATAAGGAGTCCACCAA  
GTCCAAACCGAAGCTTGAAGGCAAAAACACACCCAATGGTAGTGTGAGGAAATAGAACC  
CACCAAGACTAGCATACATGCTTAGCCAGGGTCGTCCAGTTCCTCGTACTATGCCTCCAC  
AAACCGTCACAGGAAAATTAACACTTCGACCAGAGCCATCAGCAACATTGCCTTCTCCA  
CACCTTTTACAACCCCTTTTTGATGACTAAACAAATTCCCCCAAACCCCTCTAGCAGCCA  
CCATGATGGAACCTCCAATGCAACCCGATATAACACTCACTGCCAAAGACACACGTGCTG  
ATTTATAAGCTTGACCAGCACGGTTAGCACCAAGTTCATTGGACACACGAGTGGAAACAC  
TAGTGGCTAGAGAAAGCATCACTGCATAAAGCAAATAGTCAAAGTTTAACACTATGGCCA  
GAACCCCCACTGCTTGTTTTGCATTTGCCAAGTGGCCAGTGAGGAAAAGTAGAATCTCAT  
AACACCACCACTCAAGGCACGTGTTGAGGCAGCATGATCCACTAAGCTTGATTAGCCTAC  
TCCAATCCATCATGTTCTGATCCCACCACCCTCCTCCTTCCACAACATGCTCCCATTTC  
TTCTCTCAAGAACCACAACATAAATTGCAAGCATAACCATAACAATGAGGTCGGTTACCC  
AAACCGCGATTGAACTCCTCGGAGTCCCATGGTTTTGGAGAGTAGTATGTTAACGGGTA  
TGTGAAAGGCTAGTGCCACAGCAGAACTAAACATGGTGGGAAGAGTCATGCACTGAGAGC  
TGAGGTAGGCTTTTAAGGGACAAAGGAGTGCCTTGATAAACAAGTCAGGTATGAGATAGG  
AAACATAGGTTTTGGCCACTATTGAGATCTCTTGTTGTTGGCCAAAAGAATCAAAATCT  
TGTCACGTTAAGCCACAAGAAAGATAAGGGAAGTGTTACCAAAGCAACAAGAGGGTTG  
TCATGAGAAGGGTCTTGTGAAGGAGCCTCACGTTCTTGGCTCCATGTGCTTGTCCACAAA  
TGGGTTCCATGGCGCCGCTTAGACCGTTCAAGACAGCGAAGCCGGAGACATTAGCAAAAC  
TGAACCCGAGTGCGCCACCGGCTAAGTTCAGCTCCCCAAGGTGGCCGAGAAAAGCTGTTG  
TTATGGCTAAGTTGGCGAACCAAGCCAAGTTCATGGCCACAAGTGGAAGGGCTATCCCTC  
GTTGGACTCTTAGCTCTTCTACCACCATCTTCACAAAATTGGCATTCAAAGGGCATTTTT  
TAGTGTGCGATGAAGGAGTTGAGGGGTGTCGGTTGGCCCTGTCGTTTGTGCTTAAGTTCT  
CTCCTTCTTAGATGTTGCTGACATTTTTGCTGAGATGAATCAGATAATGTTTTGGTGAG  
ATTGTTGCCAAGTTTCACTAGCGTACCTGTTTC

>**Gmax\_MSTRG.157.1** GeneID=Gmax\_MSTRG.157;Strand=+;Pos=Chr01:707531-709259,  
CGTCAATCAACAATCATCATAATTTTTTTTTTTATTTTCATCAAGAGTAGTTGTTGTTGTC

CAAAGTGGCAATCAACGGTTGTTTGTGGCCGTCGGATCCTTCATCAAGGGCCGTAAGTAA  
CTGGGCCCCGACAGGCCTGGTACTCCCAATCGGTGGTCCCAATCATATACAACATGAGGCC  
CGCACAACAAACCTGGGCGGACAATAGGCCAGCCAGAGCCACAGAACCCAACCTCGAG  
CCAGAACGCAAGGCCAACTGCCACGGGCATCCCCACCAGATAAAACGCTCCCAGGTTAC  
ATTCGCCGCCACGTTGCGCCTCGCCGTCCCCCTACCACCCCGCACCCACCGTCTGCGG  
GCAGTTTCCCAGCTCGCACAGCCCCAGAATCGGTAGCGCCGCCCCCGTCAGCCGCAGAAT  
CCCCTCGTCTCCGGTGAACATCCTCCCCACCTCCTCCGCATCGCCGTCGCAAAAACCAC  
CGCGGAGAACCCCATACGGCGGCAAAGAACACCGCCACCACCGCCGACATCCTGGCGCG  
TCGTCCCCTGTTGGCGCAAGCTCGTTTCCACGCGCGTAGACACCGCAAGCCCCAGCGA  
GGAGGGAAAAACGTAGATCAAGGACGTAGTCTGGATTAAAATCCCCATAGCCGCCACGCT  
GGCAGTGGGGTCCACCAACAACCCACACAACAAAATCATGATCTCATACCACCACCACTC  
CAAACAAACGGAGACACAGCTCGGCGCCGCGAGCCGAATTAGCGGCTCCAGCAGGTAA  
AACTCCCAGGCTCGGCGCGGTCCACGTGGCCAGGTGGACCCCACTTATCCACAAATAGAG  
AACCAGCAAACATAGAATGGAAAAGCTGGAGGCGGCGGCGGCGGCGGCGACGCCACCCAG  
GCCGCGCTCGACGAGAGCCAGGTTAAAGGCCACGTGGAGGAGGGTGCCGGCGAGGGACGC  
TAAGGTGACAGGTGGGTGACGTTCTGGGCGCGAAGGTAGACTCTGATTGGGTGGAGGAA  
AGAGTTGATAAGGAGGTGGGGAGGAGGAAGAGCAAGTAGGTTTGTGCCATTTGGGTGAT  
GTGTGTGTGCTGGTTGAGTAAGATGAAGATNNNNNNNNNNNNNNNNNNNNNNNNNNNNNN  
NNNNNNNNNNNNNNNNNNNNNNNNNNNNNNNNNNNNNNNNNNNNNNNNNNNNNNNNNN  
NNNNNNNNNNNAGACCATGGAACGCGCGTAGAAAATTAGACCAGTGAGTGCTGTGCGGAAT  
GCCACCTCCCACAGGGATTCGTTCTCCTATCACATCCCACATTATTGTCCTAGTCGAA  
CCTCGTCTTGTTAATAACCCACCTAATTCTGTCTGCTTTTCCGTATCATGCATCTGCTCT  
GATTTTGATTGCGACATGTTCTTGTTATATCAGTACGTCTTCGTTGATTAGGAAATCAAG  
TTAATCTAGGAGGTAAACACCCAGAAATTTTATCACGCAAAGTAACCTTACACCATAGC  
TTAAATCCAAAACCAAGGTGGGAACTCAAAGTAGGGTGTGATGGATTTACTATATGTGTG  
TTTATGAGAATGATACACAAACACACTAGCTAGTGTGTTGTGATGAATGAAATTAAGA  
GGAGGGGGTGGGACTCTGTTTTTGTGTTGATGGGTGGAAAGCGAACAAGGGAGGAAATAG  
GTGGAGGGAAGGAGCGGAGTGATAAATTAAGAACTAGGTAATTATTAC

>**Gmax\_MSTRG.70936.1** GeneID=Gmax\_MSTRG.70936;Strand=-;Pos=Chr13:37708922-37709311,  
CCTGATAAGACACCTTGACAGAATCTAGTAATATGGAAATGGAAAGAAAGGGTGTCACT

GAAGCCAACTCCTCTTTAATTTTAGAACTATCACTGAACATCTGAATCCATATATTGTGA  
CCAAATGCAAGTGCCAAAACAAAACATAAACCAAGGAGAGAGAGAGCTTGAGACTGACA  
CCCATTGCATGCTTAGCTCGATCCAGGTGGCCTGATCCCAATTCATTGGAGACCCTTGTA  
CTAATATCATACTCAATTTTTTTAGCTATTCAAAAATTGTATAATGTGTGCCGATTCAGA  
AGATACACAACAATGCAAACAAAAGGAGAACATTCTTAACTTACTAACCTTGCAGCTGCA  
CTGAGACCATAAGTGATCAGATAGGCAATT

>**Gmax\_MSTRG.99026.1** GeneID=Gmax\_MSTRG.99026;Strand=-;Pos=Chr19:37882699-37883154,

GCTAAAACAGAGAAACCTTTCCATGTTTCAGGGCACCAACCACATGTAATAAATATTAGT  
TGACCAATATTCGGAATCCAGTATGCCAAAATTGTTGAAATCATTGCCCCAGGAATCCCA  
TACTTGAATTGCATTGTGAATAGCCAAGAGAGGGACACATGAATGATTATTGATAAAGCT  
GCCAAAAATGAAATAATGACATTCTTGCTTTGAGATTGAAGGAATGTCTGGCAGTTGTTT  
GAGACAATATAAGCAAATAAGATAGGAATTGACCAAAGAGAAATGGTTCCTGCCACTTGT  
CCTATGCTCTCATCTTGGCCTAAGATAGTCAAAATTGGGCTTGTGAAGATCAACAGGGGA  
AGAAGACAGATTGCAGTTAAGAATAAACTATCCATGATCTTTGAAGATACACTCCCATC  
ATGTCATATTCTTTGCACCGTATGCTTGTCCACAA

>**Gmax\_MSTRG.5524.1** GeneID=Gmax\_MSTRG.5524;Strand=-;Pos=Chr02:3553029-3553331,3625710-3626398,

GTAAGTTCTTTCTTAACATTAATAAATTACCCACTTATTTGAAAACCTCCAATTTTATAGAC  
TTCAACATGAGTAAAGTGCCATCAAACATGGGCAGGTGGTATTCTTCAAAGAAAATTCTT  
CAAAAGGTTACAGTTGAAGGTATAAATGAATAATCTATACAGTCACTGGCAGTATGACA  
TTACATCTGACGCTTATCAGCATATTGACTATGAATACCTCCAAACTACCTAGTTGCATG  
CTTTTGCATCTGCCTTAGAACCTGTAGGGTGAAATCTTTCTGAAGCCGCCATGCATTTTA  
AACCAAACTTCTGCAGCTTCCTTTTCTACTGAAAACCTCACCAACTTTCTTGATAATG  
CTATAAATACATTGGTCAGCAACAAGAAAAAAGTTGCTGCCTCACTGTACTGCCTTTA  
AAAAGCCAGAACAAAAATAGATTATCTGATGTGTAAACACAAATCATGCCATGGCATCAG  
CCTGTTTTCTGGTTAACCGTGCATACAAACCATCTTTTAAGAGAAGTTCCTGTGACTTC  
CCATCTGCTTGAACAGAAGTTAATGAAAATTATGTTTCCGATTAGGGCAAAGAAAGGATA  
AGCATAGCTTCTCATTCAAACACATAAAATCCAAACAGTTTCAGTAATGCTTGGGATGTT  
AAAGAAGCCTTATTCTACTTGTAAGTTCAAGATGATATAGAAGAAAGTGTAAGGTTTAAG

AATAATCTCCAATGAAGGACAAATAGTAGAAACGGAGGTTATGTTTTTTTTCTCTCCGAG  
GGATGGATGGATGAAGAACTTCCAAAAGCGCAAGAGTATAATGCAGCTTTTACAATGATT  
TTCTTACAACCTTGAATAACCTCTATCGTCTTCGTATTGCTCCATGAATTCATCATTGAA  
CTTTTTGAAACTATCCATAATATCAGGCATGTCTTCCTCAGCTGGTAAAATAGTTGTCCT  
CAAATGGAACACCCTGTAAGCATAAGTTTGAC

>**Gmax\_MSTRG.104177.2** GenelD=Gmax\_MSTRG.104177;Strand=+;Pos=Chr20:36602365-  
36602429,36607743-36609133,

GTACATACCATATGGATAAGACTGAAGTTTCAAGCTCTGGATTTGGTAGAAGACCAGAAA  
GCAAGGTTAGCAGCTCAAATGACCACCACTCAAGGCTGCAACGATCAAATAAGTAAGAAA  
CATACCATGGTTGAAAATTAATGGGAAATAAAAAACACAACACAAAAGATAAAATATAAG  
AGGAAGAAACTCACCAAACCATTCAGCTGAAGGAATAGCATAGGTGAAGAATTCACCAA  
TCCCATGGAATAGTTCCATTGAAATTGGGACTCGAGTCCTTTCACATTCAGTAGAGAATT  
TCATATATAAGCCAAGTAAAATCACATTCAGCCAGTATGAAGTACCAATTGAAAATGCTG  
CTCCAAGTTACCAAATCCAGATTTAAAGACCATTAACCAACTGAAAGCCACATGGAAGC  
AAAGAGTAATGGAGGAACTTATGACAAGGGGACTGATCAAACTTTGCATCAAAAAGAATC  
GAATCAAGGCCTGAAGTGTTGCATAAGCAAAGAGAGCAGGGATCATGCACAAAGCAAATT  
TTCCAGCTTCTTGTGAAATCGAAGGGTCTTGCCAAGAAATATGAGTATCTTCTCCAAGT  
AGACCCAGAAAAGAGTCAGAGGAAGACAAGCTAAAGTAAGAGAGACAATAGCAGTGTATA  
TTTGAACACCAAATTTTCGATATTGCTGTGCTCCATATGCTTGCCACATTGAGTTTCCA  
GTGCACATGACATTCCAAACTGTTTGACATGTACAAAAAAGACAAAGTGCAATTAATTCT  
TATAATTTTTTTAGAGACCATAGGTATCTTCACATAAGAGAATCCTACTCGAACTTAAGC  
CATTTTGTGTTTTAATTCATCTTCATCTCTTTTGTTTTTAATAATTTTCCATCCTTTGAT  
AATTTGGGTTCAATGCAGTAGTAGGTCTCAAAGCTTAAGAAGAAAGCAGTGAGATGGGAA  
AGGAAGAGACTTACAATAAGACTGAAGCCAGAGACAGCACAGAGAGAGATGGCAATGGCT  
GTGCTAGAGAGAGCAAGCTTACCCAAGTGACCAACCATCATCATTGAAATAATCTGTAGA  
AAATACTGTGACAAAGTCACAGTAATCATAGGAGCTGCTAGATAACCCACTCTTTTCATT  
TCCTGAGAAAAGACAGTCCATGTTATGGCTGAAGCTGAAGGATTCTCCGGCTCTGAGTCC  
TTATCTAAGAGACTATTTTCCATATCCTCTCCAAAGGGTCACAGAATCACTGCACCTTGT  
CGAAACTGGTAGAAATAATGGCAGGGCTTTGGTGTTTTGTATGCTAAAAGGTTTAAATAT  
TTACAAGTGGCAGCAGCAGTAGTTCTTCCAAGGTTTAAATATTTGTTTCAATAATGACTG

TCTCAGAGTCTCTCATGGGCTTCCCCCTTTATGTAGACGGAACAATATTTCAAGTAAAT  
TTTAAAATTTAAAATC

>**Gmax\_MSTRG.99025.1** GeneID=Gmax\_MSTRG.99025;Strand=-;Pos=Chr19:37876995-37877310,37879224-37879843,

ATAGAGTAAATAATAGGTCGTAAATGCTCCTAACTATAAATAGCGCTAGGTTTTTCAGAT  
TGATTCCTCAGCCTCCTCTGTCTCTCATTTTCGTTTTTCCCCTTCTCCTCTCAAAACCCT  
TTCTTTTTCCCGCCGCCACAAAACCTGTCTCAGAAAAATGATGATCTCGGACTCATTCA  
CCGTTGGATTGTCGTGAAATTTGAGCACCACGTTGCAACCCAATTTGAGAATTCTCAC  
CGTTGGGAATTGAAAAATCATGTCTGGGCTTAGAGGAAAACCCTTCGCATTGTAGCTTTT  
TATTTTTCTGCAGAAACCCAAAACCTGTCTCGGTAAAACTACGATCCCGGTTTCGTTAACC  
GTTGGATTTTCATGAAATTTGGATATGTTGCTCGAAATTAAATTTCTCACACTCTCACCG  
TTGGGATTTGCGAGATAATATTCTTGGTGGGAGAAAAAGGAATCGCATGAAGACAGTACA  
AGCGGAGGCTTCAATCTCTTCTCCGTCTCTCTGACGTTGAGAATTCTATCGGAGCAGTC  
GGAGGAAAAACTTGAGGAATCTCAGGAAACCGCTATAGATGTCTCTATCGTTGTCGGAAG  
ACACGTGAGTCCGCTTAGAGACGACTAGGTGAATTGATTTAAGGAACCTTTTGCTGAAGG  
ACGTCGAGACACAACGCTCTGATAGGATGTGGCATTGGGGTATAGGGTTTTATATTAATT  
GTATGAAGTCTTAAACGGTCTTGCTTAAACCGAGATAACTTTATTAGAAATTTGGACAAG  
TTTGAATATGATGTAGAAGAAAGTGAATGTGAGCCTTTTATCCTTTTGAAAACTTGAT  
TTACAAATGTAAAAAATACTATTAATTAATTTGGATTTTATTCTTTATCAG  
TATATATGTGAGAGATAGATGGTGTACAGTAAGAG

>**Gmax\_MSTRG.34859.1** GeneID=Gmax\_MSTRG.34859;Strand=-;Pos=Chr07:19191538-19191837,

CTGAAATGACGAAGCAGCGAAGAAGAGGAATTATATGGTGGTTTAGGGGAAGAGGGTTGG  
AGGGACGGAGTTTCAACAGAATCATTATTGGCATTGTTGTTTTGCGAAGAAGCTTTGGGT  
GGAACTCGAACTCGAGCACGAAAACGAGCGAAGCAATGAGGCTTTGTGAGAGGTTTCAGC  
GTTGGGGATTTAGAGAGTGTGTGCAGAGAAAAGAGGTAGTAGAGAGAGAAGACGCCATT  
CTCAATTTGAGCTTCAGAATCAGATATGAATCTTGAGAGTGGAATTTATGGAAATGCCA

>**Gmax\_MSTRG.5537.2** GeneID=Gmax\_MSTRG.5537;Strand=+;Pos=Chr02:3723902-3723911,3724148-3724578,3724648-3724859,

AATGATCAAGGGCGGAAAAGCCTCCACGTGGACGAATCATCAAAGACAATGCTTCTCTCG

AAAGTTTTTAAGCCAAGACCATGGCTACGAAGATTCCAGAGAGTGCGGAGCCAGCAATGA  
AGGCCTTGCTGGCGGAGAATGCGGCGGAGGGTGGCGGTGGTGGCTCGGCGCCACCTGCGG  
GTCCGGGAGCGGGTCCGGCTGTGCCTGGTGGTGGGAGAACTAGCGGAAGGGACTGGTG  
AGGTTGCAGGAGAAGAAGCAGGTGTAGGTGCAGCTGTTGGTGTGGCGTTGGTGTGTTG  
CTGGTGGTGATGTTGCTGGTGGAGGAGTTGCTGCTGCTGGTGGTGGTGTGCTGGTGGTG  
GTGTTGCTGGCGGGGTGGGTGCTGGTGCAGGTGCTGATCTTGGTGGTGGTGGTGGTGGG  
TTGTAGTGGGTGGTTGTGTGGCACCAGAACCCATCTAGCTATAGAGAAAATGAGAGACCA  
AAGAAAATGTTGTAGTGCTTGTGTGTGTAAGAGAAGAGAGAGAGAGAGAGAGAGTTTGAGCAGT  
GGAAAGATGATAAGGGAACAGAATATATAAAAAGAGAGGTAGAGTATGTAAGTGGGGGGC  
TTCAAAGGCGTTAAAGGACAGCGCTGATTAATGCATCAATAATGCTACAAGAT

>**Gmax\_MSTRG.20763.1** GenelD=Gmax\_MSTRG.20763;Strand=-;Pos=Chr05:130422-130681,  
GGTAGCAATAGCAACTCCAGAGAAGGAGACCAGTATCCCAAGATGTCCACCATCATCAA  
AGACACAACCTGTAGAAGGTACTGCGACACCGTGACAGCCACCATTGGAGCCGCCATGGA  
GCTTACCCTCTTGAACCTCTTGGCAAAATGTACTCTCCACCCCATTATTATTCTCTTGCTC  
GCCACTCTTTCTCAGCACTAGCAGTGGTGCTGCCAACTCTCTGGAGCTTTCATATTGTC  
AACACTGGTCAATGTTTCATG

>**Gmax\_MSTRG.6400.1** GenelD=Gmax\_MSTRG.6400;Strand=+;Pos=Chr02:7929647-7930398,  
CTCGCAGGCCCACCACTTAAGACTGTATGACAGATAAGTGACCATGTTGGCCAAATCATT  
ATGATCGTGTTGCAAAATCTTCTCAAAATACTCAAGACTTTTTTTTTTTGTATTGGCAGA  
AATAAAAAATAGTATAAGGAGATTTATTTTAATTAATAAAATATTCTTAAAAAAAAGTGT  
ATGGATAGCAAAGCGAGAGAATAGTTACCAAACCATGACTGCTGCTGGGACAGCAAAGCG  
AAAGAACTCTCCAACACCAACCAAAGCATTCTTGGAGAAAGAGATGCGTGTTTTCTCACA  
AGCAGAGGAATACCTCACAAAGGACAAAAGCATTATCACATTAAACCAAACGCAAAGGCT  
GAAGGAGATTGCGGCACCAACATGTCCCAACCCCAGTTTAAAAACAAGGGTCCAACATGT  
TACTACGTGGAAGCACAAAGCTATAGCGGAGGTTAGAATCATGGGAGAAATCAAACCTCTG  
GGTCTGGAAAAATCGTGTTAGAGGTTTGAGAATTGCGGAACCAAATAGAGCAGGTATTAG  
CCAAATGGCATATTTACGAACTTCAAGGGATATTGTTGGGTCTTGGCCTAATAGAGTTAA  
TATTTTGTCAATTGAAAATCCATAGAATTGTGATCGGGAAACAAACCAAAGAAAGGGATAT  
TATGGCAGTGTAAGTATATAGTCCAAATTTTTCATATTGCCCTGCCCCGAAAGCTTGGCC

ACATAAAGTTTCCAATCCACCAGCCATCCCTG

>**Gmax\_MSTRG.10877.1** GeneID=Gmax\_MSTRG.10877;Strand=+;Pos=Chr03:546888-547123,

GAGAGTACAGGTTGAACACTGTTTCAGTAATATAGAGACCGACAACAAAGGTGACAAATCC

CCAACAGCAAAGGCCACCTCTTTATTTGAGGTAAATATATATGCAAGTCTTTCTCTAAAA

AATAAGAAGAATATGAACAGAAGGAATCCGATGGCCAATGATGTGAGCACTGACACAATA

ATAGAGAACTTTGCAGCTTTGGCACTTCCTCTTCCAAGTTCATTTGCCACTCGAAC
