# Supplementary material for: The Identification of MATE Antisense Transcripts in Soybean Using Strand-Specific RNA-Seq Datasets
Source: Genes (Basel). 2022 Jan 26;13(2):228. doi: 10.3390/genes13020228 (PMC8871956; doi:10.3390/genes13020228)
Supplement: Supplementary file 1 [file genes-13-00228-s001.zip]

Archive with 5 entries (5 files):
- Supplementary Figure S1.pdf
- Supplementary Material 1.pdf
- Supplementary Material 2.pdf
- Supplementary Table S1.pdf
- Supplementary Table S2.pdf
